# Supplementary material for: CRISPR/Cas9-Mediated Targeted Mutagenesis of CYP93E2 Modulates the Triterpene Saponin Biosynthesis in Medicago truncatula
Source: Frontiers journal article supplement (doi:10.3389/fpls.2021.690231), 2021-07-26
Supplement: Data_Sheet_2.PDF [file Data_Sheet_2.PDF]

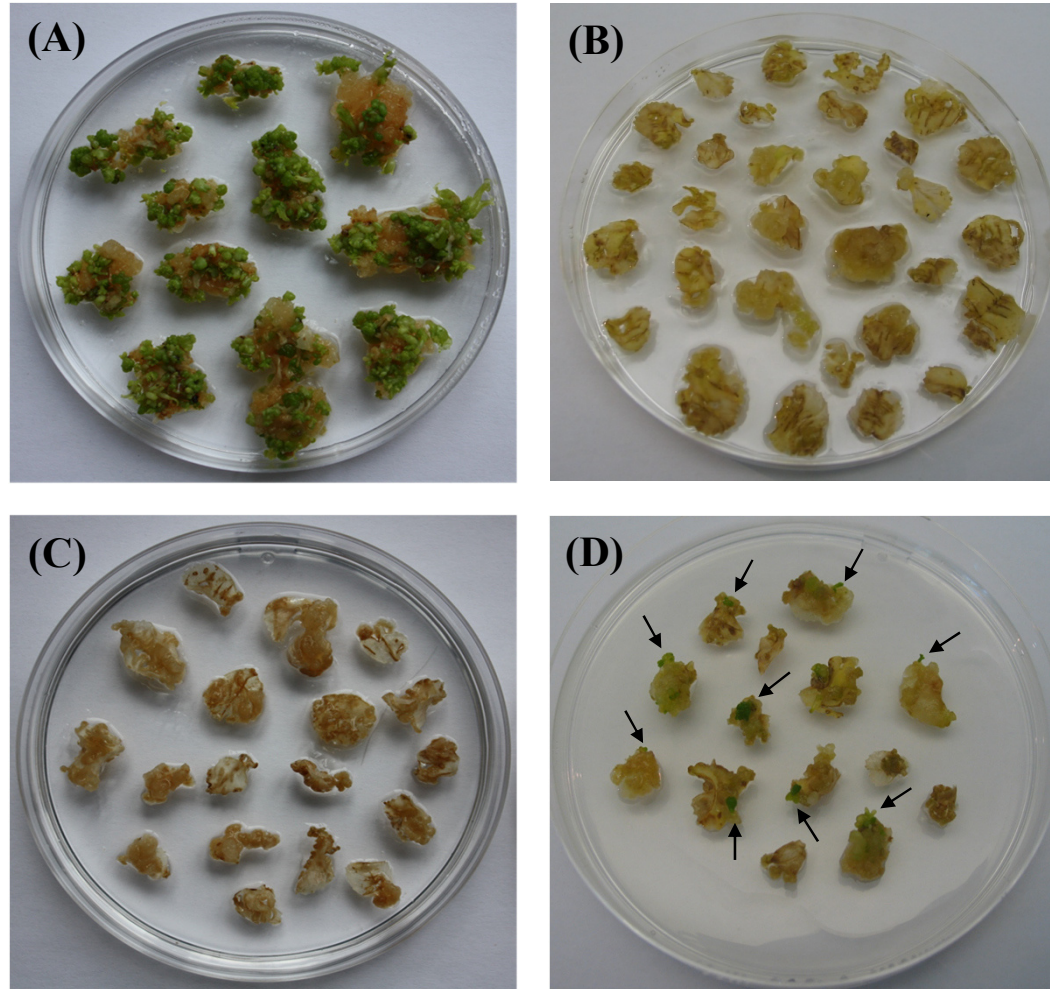

**Supplementary Figure 2** | Genetic transformation and *in vitro* somatic embryogenesis of *Medicago truncatula* (M9-10a genotype). **(A)** Somatic embryogenesis from M9-10a leaf explants cultured on embryo induction medium (EIM) lacking kanamycin (positive control). **(B)** Leaf explants of M9-10a cultured on EIM containing kanamycin (negative control). **(C)** Leaf explants of M9-10a cultured on EIM with kanamycin after co-cultivation with EHA105 pCas9-CYP72A61. **(D)** Leaf explants of M9-10a cultured on EIM containing kanamycin after co-cultivation with EHA105 pCas9-CYP93E2. Black arrows indicate differentiation of somatic embryos on EIM selective medium.
