# Supplementary material for: CRISPR/Cas9-Mediated Targeted Mutagenesis of CYP93E2 Modulates the Triterpene Saponin Biosynthesis in Medicago truncatula
Source: Frontiers journal article supplement (doi:10.3389/fpls.2021.690231), 2021-07-26
Supplement: Data_Sheet_3.PDF [file Data_Sheet_3.PDF]

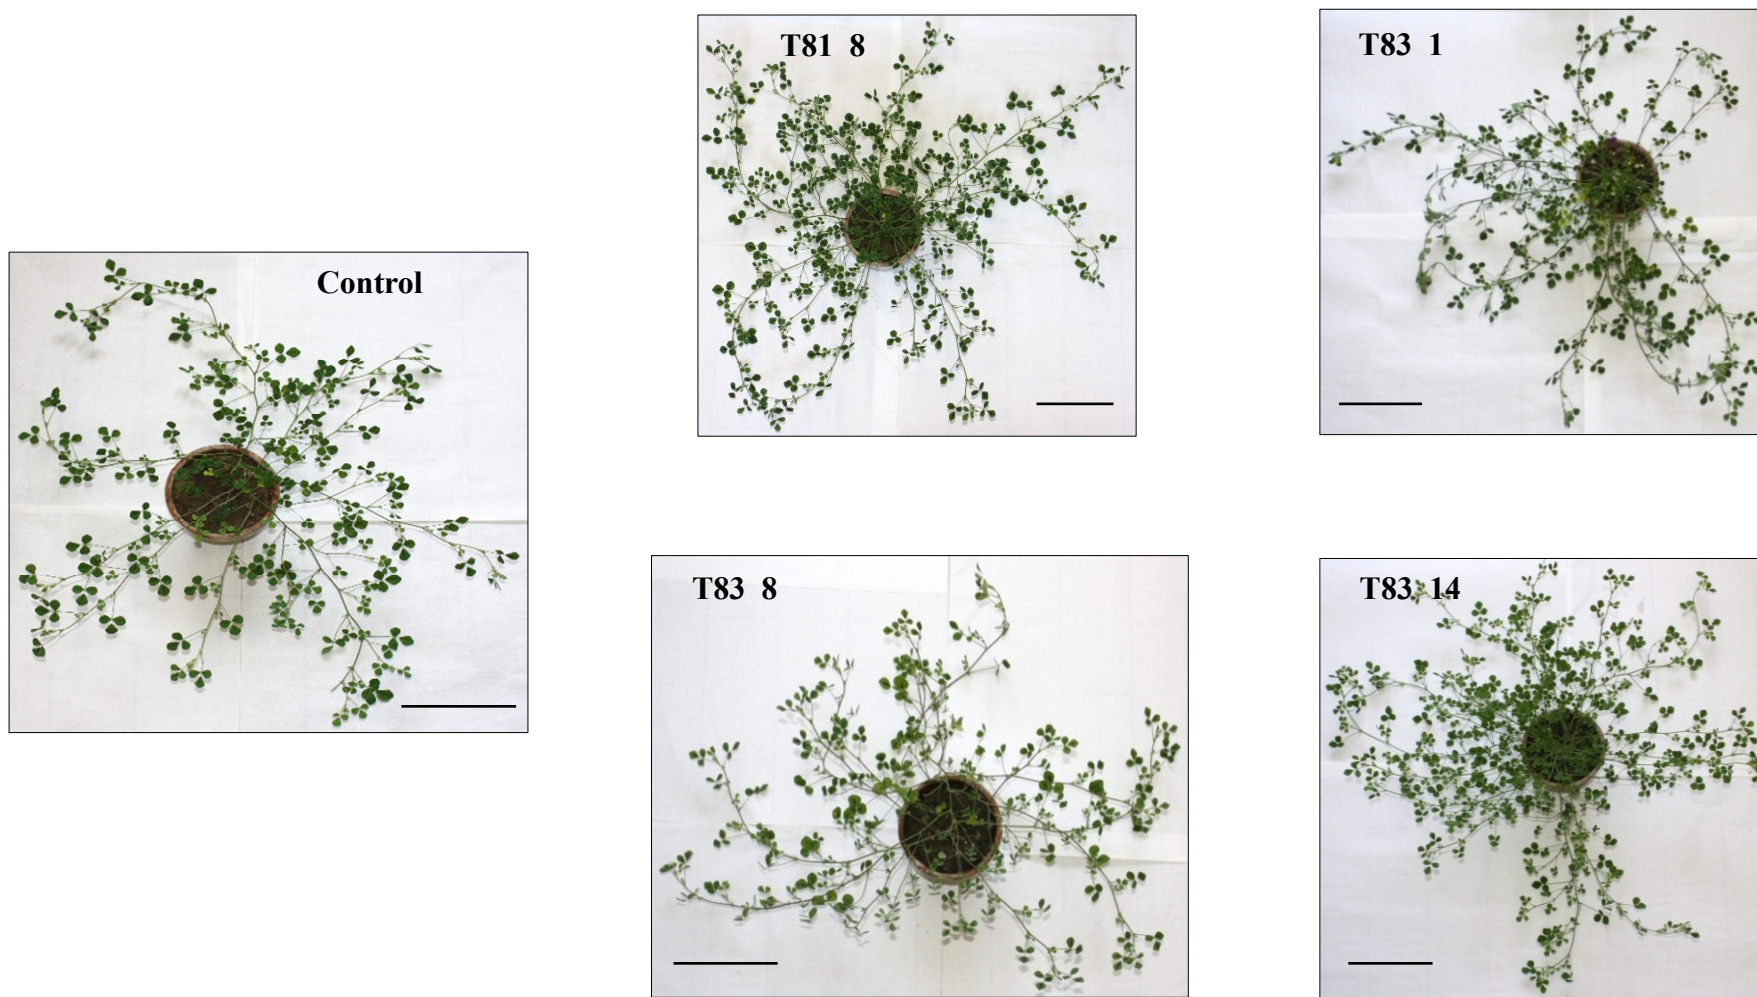

**Supplementary Figure 3** | The phenotype of control and *CYP93E2* mutant (T81 8, T83 1, T83 8 and T83 14, respectively) plant lines under greenhouse conditions. Pictures were taken at the start of plant flowering. Scale bar = 12 cm.
