# Supplementary material for: CRISPR/Cas9-Mediated Targeted Mutagenesis of CYP93E2 Modulates the Triterpene Saponin Biosynthesis in Medicago truncatula
Source: Frontiers journal article supplement (doi:10.3389/fpls.2021.690231), 2021-07-26
Supplement: Data_Sheet_7.PDF [file Data_Sheet_7.PDF]

**Supplementary Table 3** | Transformation efficiency of M9-10a leaf explants co-cultivated with different *A. tumefaciens* strains: EHA105 *pnptII*-Cas9 (control), EHA105 pCas9-CYP93E2 and EHA105 pCYP72A61.

| Bacterial Strain           | No. of explants infected | No. of explants producing kanamycin-resistant somatic embryos | Transformation efficiency (%) * | No. of explants producing kanamycin-resistant plant lines | Transformation efficiency (%) ** | No. of kanamycin-resistant plant lines tested by PCR (Cas9) | No. of kanamycin-resistant plant lines Cas9 + |
|----------------------------|--------------------------|---------------------------------------------------------------|---------------------------------|-----------------------------------------------------------|----------------------------------|-------------------------------------------------------------|-----------------------------------------------|
| EHA105 <i>pnptII</i> -Cas9 | 272                      | 31                                                            | 11.4                            | 12                                                        | 4.4                              | 3                                                           | 3                                             |
| EHA105 pCas9-CYP93E2       | 529                      | 54                                                            | 10.2                            | 34                                                        | 6.4                              | 52                                                          | 51                                            |
| EHA105 pCas9-CYP72A61      | 487                      | 0                                                             | 0                               | 0                                                         | 0                                | 0                                                           | 0                                             |

\* The transformation efficiency was calculated dividing the number of leaf explants with kanamycin-resistant somatic embryos by the number of infected explants.

\*\* The transformation efficiency was calculated dividing the number of leaf explants with kanamycin-resistant plant lines by the number of infected explants.
