# Supplementary material for: CRISPR/Cas9-Mediated Targeted Mutagenesis of CYP93E2 Modulates the Triterpene Saponin Biosynthesis in Medicago truncatula
Source: Frontiers journal article supplement (doi:10.3389/fpls.2021.690231), 2021-07-26
Supplement: Data_Sheet_8.PDF [file Data_Sheet_8.PDF]

**Supplementary Table 4** | *CYP93E2* mutant T0 barrel medic plant lines: sequences at Sg1 and Sg2 target site.

| Number of plant lines | Sg1 target site                                 | Sg2 target site                         | Selected plant line |
|-----------------------|-------------------------------------------------|-----------------------------------------|---------------------|
| 8                     | WT                                              | WT                                      | —                   |
| 2                     | Heterozygous: WT and one long bp deletions      | WT                                      | —                   |
| 6                     | Heterozygous: WT and one short bp deletions     | WT                                      | —                   |
| 10                    | Heterozygous: WT and multiple mutated alleles   | WT                                      | —                   |
| 4                     | Biallelic: short bp deletions                   | WT                                      | —                   |
| 1                     | Biallelic: -4bp deletion and +1bp insertion     | WT                                      | —                   |
| 1                     | Homozygous: +1 bp insertion                     | WT                                      | T83 14              |
| 1                     | Homozygous: -7 bp deletion                      | WT                                      | —                   |
| 2                     | Heterozygous: WT and one short bp deletions     | Heterozygous: WT and short bp deletions | —                   |
| 1                     | Heterozygous: WT and multiple mutated alleles   | Heterozygous: WT and -55 bp deletions   | —                   |
| 3                     | Biallelic: short bp deletions                   | Heterozygous for long bp deletion       | —                   |
| 1                     | Biallelic: -4 bp deletion and -30 bp deletions  | Heterozygous: WT and -1 bp deletion     | —                   |
| 2                     | Biallelic: short bp deletions                   | Heterozygous: WT and short deletion     | —                   |
| 2                     | Biallelic: short bp deletion and +1bp insertion | Heterozygous: WT and short bp deletion  | T83 1               |
| 1                     | Heterozygous: WT and a long bp deletion         | Biallelic: -4bp and -6bp deletions      | —                   |
| 1                     | Biallelic: -1bp and -4bp deletions              | Biallelic: -1bp and -3bp deletions      | T81 8               |
| 2                     | Homozygous: +1bp insertion                      | Biallelic: short bp deletions           | —                   |
| 1                     | Homozygous: -4bp deletion                       | Biallelic: -28bp and -70bp deletions    | T83 8               |
| 1                     | Biallelic: -5bp deletion and +1bp insertion     | Homozygous: -11bp deletion              | —                   |
| 1                     | Biallelic: -3bp and -4bp deletions              | Homozygous: -126bp deletion             | —                   |
