# Supplementary material for: CRISPR/Cas9-Mediated Targeted Mutagenesis of CYP93E2 Modulates the Triterpene Saponin Biosynthesis in Medicago truncatula
Source: Front Plant Sci. 2021 Jul 26;12:690231. doi: 10.3389/fpls.2021.690231 (PMC8350446; doi:10.3389/fpls.2021.690231)
Supplement: Supplementary file 9 [file Data_Sheet_9.XLSX]

## Sheet: CYP93E2 gRNA1
#Bulge type	crRNA	DNA	Chromosome	Position	Direction	Mismatches	Bulge Size
X	GTAGCCTTGGATTTCAAGCANGG	GTAGCCTTGGATTTCAAGCATGG	7	19508664	+	0	0
RNA	GTAGCCTTGGATTTCAAGCANGG	t-AGCCTTGGATTTCAAGCATGG	7	19508665	+	1	1
DNA	G-TAGCCTTGGATTTCAAGCANGG	cGTAGCCTTGGATTTCAAGCATGG	7	19508663	+	1	1
RNA	GTAGCCTTGGATTTCAAGCANGG	GT-GCCTTGcATTTgAAGCATGG	5	2472022	+	2	1
RNA	GTAGCCTTGGATTTCAAGCANGG	ta-GCCTTGGATTTCAAGCATGG	7	19508665	+	2	1
RNA	GTAGCCTTGGATTTCAAGCANGG	GTAG-CTTGGATTTtAAGaAGGG	4	46919485	-	2	1
RNA	GTAGCCTTGGATTTCAAGCANGG	GTAGC-TTGGATTTtAAGaAGGG	4	46919485	-	2	1
DNA	GTAG-CCTTGGATTTCAAGCANGG	GTAGACCcTGcATTTCAAGCATGG	6	12737177	+	2	1
DNA	GT-AGCCTTGGATTTCAAGCANGG	cgTAGCCTTGGATTTCAAGCATGG	7	19508663	+	2	1
RNA	GTAGCCTTGGATTTCAAGCANGG	GT-GCaaTGGATTaCAAGCAAGG	5	17891000	-	3	1
RNA	GTAGCCTTGGATTTCAAGCANGG	G-tGCCTTGcATTTgAAGCATGG	5	2472022	+	3	1
RNA	GTAGCCTTGGATTTCAAGCANGG	G-AGCaTTtGATTTtAAGCAAGG	5	42401579	+	3	1
RNA	GTAGCCTTGGATTTCAAGCANGG	GTAGCCTTat-TTTCAAGCtTGG	6	32675536	-	3	1
RNA	GTAGCCTTGGATTTCAAGCANGG	GTAGCCTTGG-TTctgAGCAAGG	5	24408604	-	3	1
RNA	GTAGCCTTGGATTTCAAGCANGG	GTAGCC-TGcATTTCAAGtgGGG	5	34576517	+	3	1
RNA	GTAGCCTTGGATTTCAAGCANGG	GTAGCCT-GcATTTCAAGtgGGG	5	34576517	+	3	1
RNA	GTAGCCTTGGATTTCAAGCANGG	GTAGCCTT-atTTTCAAGCtTGG	6	32675536	-	3	1
RNA	GTAGCCTTGGATTTCAAGCANGG	GTAGCCTTa-tTTTCAAGCtTGG	6	32675536	-	3	1
RNA	GTAGCCTTGGATTTCAAGCANGG	GTtGgCTT-GAaTTCAAGCAAGG	5	2323605	-	3	1
RNA	GTAGCCTTGGATTTCAAGCANGG	GTtGgCTTG-AaTTCAAGCAAGG	5	2323605	-	3	1
RNA	GTAGCCTTGGATTTCAAGCANGG	tTAGCCTTtGATTTCAA-tAAGG	5	38746893	-	3	1
RNA	GTAGCCTTGGATTTCAAGCANGG	GTAGCggTGGATTTCgA-CATGG	8	1815341	-	3	1
RNA	GTAGCCTTGGATTTCAAGCANGG	GTAGatTTGGATTTCAA-tATGG	3	1609497	+	3	1
RNA	GTAGCCTTGGATTTCAAGCANGG	GTg-CCTTGcATTTgAAGCATGG	5	2472022	+	3	1
RNA	GTAGCCTTGGATTTCAAGCANGG	tag-CCTTGGATTTCAAGCATGG	7	19508665	+	3	1
RNA	GTAGCCTTGGATTTCAAGCANGG	GTA-CCTTGGtTTaCAAGtAGGG	7	22505129	-	3	1
RNA	GTAGCCTTGGATTTCAAGCANGG	GgAG-CTTGGATTaCAAGtATGG	2	517503	+	3	1
RNA	GTAGCCTTGGATTTCAAGCANGG	GgAGC-TTGGATTaCAAGtATGG	2	517503	+	3	1
RNA	GTAGCCTTGGATTTCAAGCANGG	GTtG-CTTGGcTTTCAAGaAGGG	1	4358859	-	3	1
RNA	GTAGCCTTGGATTTCAAGCANGG	GTtGC-TTGGcTTTCAAGaAGGG	1	4358859	-	3	1
RNA	GTAGCCTTGGATTTCAAGCANGG	tTAGCCTTtGATTTCAAt-AAGG	5	38746893	-	3	1
RNA	GTAGCCTTGGATTTCAAGCANGG	GTAGCaTTGGcTTTCAAG-tTGG	2	6915453	+	3	1
RNA	GTAGCCTTGGATTTCAAGCANGG	GTAGCaTTGGcTTTCAAG-tTGG	7	15044004	-	3	1
RNA	GTAGCCTTGGATTTCAAGCANGG	GTccCCgTGGATTTCAAG-AAGG	1	6200354	-	3	1
RNA	GTAGCCTTGGATTTCAAGCANGG	GTAtCCcTGGcTTTCAAG-ACGG	1	27781761	+	3	1
RNA	GTAGCCTTGGATTTCAAGCANGG	GTAGatTTGGATTTCAAt-ATGG	3	1609497	+	3	1
RNA	GTAGCCTTGGATTTCAAGCANGG	GTAGgCaTGGATTTCAAG-tGGG	4	6316368	+	3	1
RNA	GTAGCCTTGGATTTCAAGCANGG	GTcGCCTTGaATTTC-gGCAAGG	scaffold1039	2332	-	3	1
RNA	GTAGCCTTGGATTTCAAGCANGG	GTcGCCTTGaATTTCg-GCAAGG	scaffold1039	2332	-	3	1
RNA	GTAGCCTTGGATTTCAAGCANGG	GTAGCCTTGGtTcTg-AGCAAGG	5	24408604	-	3	1
RNA	GTAGCCTTGGATTTCAAGCANGG	GTAGCCTTGGtTcTgA-GCAAGG	5	24408604	-	3	1
RNA	GTAGCCTTGGATTTCAAGCANGG	GgAGCtTTGGAcTTC-AGCATGG	3	25150260	-	3	1
RNA	GTAGCCTTGGATTTCAAGCANGG	GgAGCtTTGGAcTTCA-GCATGG	3	25150260	-	3	1
RNA	GTAGCCTTGGATTTCAAGCANGG	GTtGgCTTGaA-TTCAAGCAAGG	5	2323605	-	3	1
RNA	GTAGCCTTGGATTTCAAGCANGG	GTtGgCTTGaAT-TCAAGCAAGG	5	2323605	-	3	1
RNA	GTAGCCTTGGATTTCAAGCANGG	GTtGgCTTGaATT-CAAGCAAGG	5	2323605	-	3	1
RNA	GTAGCCTTGGATTTCAAGCANGG	GaAGCCTTGGATgT-AtGCAAGG	scaffold0539	10953	-	3	1
RNA	GTAGCCTTGGATTTCAAGCANGG	GTAGCCTTGGtTcT-gAGCAAGG	5	24408604	-	3	1
RNA	GTAGCCTTGGATTTCAAGCANGG	GTAGCCTTtGcTTT-AAGtAAGG	2	39536212	+	3	1
RNA	GTAGCCTTGGATTTCAAGCANGG	GTAGtCTTtGcTTT-AAGCAAGG	1	1551432	+	3	1
RNA	GTAGCCTTGGATTTCAAGCANGG	aT-GCCTTGtcTTTCAAGCAAGG	4	16290867	+	3	1
RNA	GTAGCCTTGGATTTCAAGCANGG	GcAaCCTTGG-TTTCAAGaAAGG	4	9432591	-	3	1
RNA	GTAGCCTTGGATTTCAAGCANGG	GTAGCt-TGGATTTtAAGaAGGG	4	46919485	-	3	1
RNA	GTAGCCTTGGATTTCAAGCANGG	GTAGCtT-GGATTTtAAGaAGGG	4	46919485	-	3	1
RNA	GTAGCCTTGGATTTCAAGCANGG	GTA-gCTTGGATTTtAAGaAGGG	4	46919485	-	3	1
RNA	GTAGCCTTGGATTTCAAGCANGG	GTAGCaTTGGA-TTCAtcCATGG	4	21194385	-	3	1
RNA	GTAGCCTTGGATTTCAAGCANGG	GTAGCaTTGGAT-TCAtcCATGG	4	21194385	-	3	1
RNA	GTAGCCTTGGATTTCAAGCANGG	GTAGCaTTGGATT-CAtcCATGG	4	21194385	-	3	1
RNA	GTAGCCTTGGATTTCAAGCANGG	GTAGCaTTGGA-TTCAtcCATGG	4	27250158	-	3	1
RNA	GTAGCCTTGGATTTCAAGCANGG	GTAGCaTTGGAT-TCAtcCATGG	4	27250158	-	3	1
RNA	GTAGCCTTGGATTTCAAGCANGG	GTAGCaTTGGATT-CAtcCATGG	4	27250158	-	3	1
DNA	GTAGCCTTGGATTTCAAGC-ANGG	GTAGtCTTGcAaTTCAAGCTATGG	8	13775825	+	3	1
DNA	GTAGCCTTGGATTTCAAGC-ANGG	tTAGCCTTcaATTTCAAGCAAAGG	4	39054567	+	3	1
DNA	GTAGCCTTGGATTTCAAG-CANGG	GTAttCTTcGATTTCAAGACACGG	8	29089836	-	3	1
DNA	GTAGCCTTGGATTTC-AAGCANGG	GTAGCCTTGtgTcTCCAAGCATGG	2	27489908	-	3	1
DNA	GTAGCCTTGGATTT-CAAGCANGG	GTAGCCTTGtgTcTCCAAGCATGG	2	27489908	-	3	1
DNA	GTAGCCTTGGATT-TCAAGCANGG	GTgGgCTTcGATTGTCAAGCAAGG	2	5400409	+	3	1
DNA	GTAGCCTTGGAT-TTCAAGCANGG	GTAGCCTTGtgTCTcCAAGCATGG	2	27489908	-	3	1
DNA	GTAGCCTTG-GATTTCAAGCANGG	GTAGCCTTGTGtcTcCAAGCATGG	2	27489908	-	3	1
DNA	GTAGCCTT-GGATTTCAAGCANGG	aTAGCCTTAGGATTaCAAaCACGG	8	34069186	-	3	1
DNA	GTAGCCT-TGGATTTCAAGCANGG	GTAGaCcCTGcATTTCAAGCATGG	6	12737177	+	3	1
DNA	GTAGCC-TTGGATTTCAAGCANGG	GTAGCCATTaGATTaaAAGCAAGG	scaffold0517	4713	-	3	1
DNA	GTAGCC-TTGGATTTCAAGCANGG	GTAGaCCcTGcATTTCAAGCATGG	6	12737177	+	3	1
DNA	GTAGCC-TTGGATTTCAAGCANGG	GTAGCCATTaGATTaaAAGCAAGG	1	37403338	+	3	1
DNA	GTAGC-CTTGGATTTCAAGCANGG	aTAGCACTTGGATTTgAgGCATGG	6	9540912	+	3	1
DNA	GTAGC-CTTGGATTTCAAGCANGG	GTAGaCCcTGcATTTCAAGCATGG	6	12737177	+	3	1
DNA	GTA-GCCTTGGATTTCAAGCANGG	GTAGaCCcTGcATTTCAAGCATGG	6	12737177	+	3	1
DNA	GTA-GCCTTGGATTTCAAGCANGG	cgtAGCCTTGGATTTCAAGCATGG	7	19508663	+	3	1
DNA	GT-AGCCTTGGATTTCAAGCANGG	GTTAttCTTGGATTTCcAGCATGG	3	4773709	-	3	1
DNA	G-TAGCCTTGGATTTCAAGCANGG	GTTAttCTTGGATTTCcAGCATGG	3	4773709	-	3	1
RNA	GTAGCCTTGGATTTCAAGCANGG	GT-caCaTGGtTTTCAAGCAGGG	scaffold0091	35511	+	4	1
RNA	GTAGCCTTGGATTTCAAGCANGG	GT-caCaTGGtTTTCAAGCAGGG	scaffold0091	38743	-	4	1
RNA	GTAGCCTTGGATTTCAAGCANGG	ag-GCCTTtGATTTCAAGaATGG	6	18070003	-	4	1
RNA	GTAGCCTTGGATTTCAAGCANGG	GT-GCCcTGGAaTTCAActAGGG	6	31950477	-	4	1
RNA	GTAGCCTTGGATTTCAAGCANGG	GT-GCCaacGAaTTCAAGCATGG	6	32189490	-	4	1
RNA	GTAGCCTTGGATTTCAAGCANGG	GT-GCgTTGaATTTgAAGCtAGG	5	29596199	+	4	1
RNA	GTAGCCTTGGATTTCAAGCANGG	Ga-GCaTTtGATTTtAAGCAAGG	5	42401579	+	4	1
RNA	GTAGCCTTGGATTTCAAGCANGG	cT-GCtaTGGATcTCAAGCAAGG	8	4788070	+	4	1
RNA	GTAGCCTTGGATTTCAAGCANGG	tT-ttCTTGGATTTCAgGCATGG	8	16103284	+	4	1
RNA	GTAGCCTTGGATTTCAAGCANGG	GT-GCCTTcaAaTTaAAGCAAGG	8	27820385	+	4	1
RNA	GTAGCCTTGGATTTCAAGCANGG	GT-GtCTTcaATTTCAAGtACGG	8	44754445	+	4	1
RNA	GTAGCCTTGGATTTCAAGCANGG	cT-GCtTTcGATTTCcAGCATGG	2	2193413	-	4	1
RNA	GTAGCCTTGGATTTCAAGCANGG	GT-GCCcTGGATTgttAGCAGGG	2	5369636	+	4	1
RNA	GTAGCCTTGGATTTCAAGCANGG	GT-GCCTTaGgTTTCAAtCtTGG	7	10314219	-	4	1
RNA	GTAGCCTTGGATTTCAAGCANGG	GT-aCCTTGGtTTaCAAGtAGGG	7	22505129	-	4	1
RNA	GTAGCCTTGGATTTCAAGCANGG	GT-GCCTTGGATTTgtgGCtTGG	7	23579354	+	4	1
RNA	GTAGCCTTGGATTTCAAGCANGG	Gg-GCCTTGGAcTgCAtGCAAGG	7	35760275	-	4	1
RNA	GTAGCCTTGGATTTCAAGCANGG	GT-tgCTTGGcTTTCAAGaAGGG	1	4358859	-	4	1
RNA	GTAGCCTTGGATTTCAAGCANGG	GT-GCtTTGGtTTTgAAGCcTGG	1	31668755	-	4	1
RNA	GTAGCCTTGGATTTCAAGCANGG	GT-GgaTTGcATTTCAAtCAAGG	1	44134154	-	4	1
RNA	GTAGCCTTGGATTTCAAGCANGG	GT-GgaTTGcATTTCAAtCAAGG	1	44142588	-	4	1
RNA	GTAGCCTTGGATTTCAAGCANGG	aT-GCCTTGaATcTtAAGCATGG	3	27735076	-	4	1
RNA	GTAGCCTTGGATTTCAAGCANGG	GT-cCCTTGGtTacCAAGCAAGG	3	28192895	-	4	1
RNA	GTAGCCTTGGATTTCAAGCANGG	GT-GCCTTccAcTTCAAGaAAGG	3	46047205	-	4	1
RNA	GTAGCCTTGGATTTCAAGCANGG	GT-GCCTTGaAgTTtAAGCcAGG	3	53440404	+	4	1
RNA	GTAGCCTTGGATTTCAAGCANGG	GT-GCCTTGtAaTTCgAaCATGG	4	2132594	+	4	1
RNA	GTAGCCTTGGATTTCAAGCANGG	GT-GtCaTGatTTTCAAGCAGGG	4	5396228	+	4	1
RNA	GTAGCCTTGGATTTCAAGCANGG	GT-GtCTTtGgTTTCAAGgAGGG	4	6990372	-	4	1
RNA	GTAGCCTTGGATTTCAAGCANGG	G-AtCCaccGATTTCAAGCACGG	scaffold1313	1629	-	4	1
RNA	GTAGCCTTGGATTTCAAGCANGG	G-AtCCTTGtATcTCAAtCATGG	scaffold0356	16443	-	4	1
RNA	GTAGCCTTGGATTTCAAGCANGG	G-AGaCTTGGAgTTCAtGgAGGG	scaffold0030	129722	+	4	1
RNA	GTAGCCTTGGATTTCAAGCANGG	a-gGCCTTtGATTTCAAGaATGG	6	18070003	-	4	1
RNA	GTAGCCTTGGATTTCAAGCANGG	G-tGCaaTGGATTaCAAGCAAGG	5	17891000	-	4	1
RNA	GTAGCCTTGGATTTCAAGCANGG	G-AGgCTTtGAaTTgAAGCAAGG	5	41433645	+	4	1
RNA	GTAGCCTTGGATTTCAAGCANGG	G-AGgCTTtGAaTTgAAGCAAGG	5	41446365	+	4	1
RNA	GTAGCCTTGGATTTCAAGCANGG	G-AcCCTTGGATTcCAgGtATGG	8	6272469	-	4	1
RNA	GTAGCCTTGGATTTCAAGCANGG	G-AGCgTTGGATTTCAtcgACGG	8	7652857	+	4	1
RNA	GTAGCCTTGGATTTCAAGCANGG	G-AGCtTTGGtTTTCAAatAGGG	8	8273064	+	4	1
RNA	GTAGCCTTGGATTTCAAGCANGG	G-AcCgTTGGATTTaAAtCAAGG	2	25616904	+	4	1
RNA	GTAGCCTTGGATTTCAAGCANGG	G-AGCtTTGaATTTCttGCAAGG	7	18759701	-	4	1
RNA	GTAGCCTTGGATTTCAAGCANGG	G-gGCCTTGGAcTgCAtGCAAGG	7	35760275	-	4	1
RNA	GTAGCCTTGGATTTCAAGCANGG	G-AtCCTTGGATTgatAGCATGG	7	41768533	-	4	1
RNA	GTAGCCTTGGATTTCAAGCANGG	G-AGCCTTGcAaTcCAAaCATGG	1	11227247	+	4	1
RNA	GTAGCCTTGGATTTCAAGCANGG	G-AGCCTTGGggacCAAGCAAGG	1	23908076	+	4	1
RNA	GTAGCCTTGGATTTCAAGCANGG	G-AGCCTaGcATTTCAAcaATGG	1	28306312	-	4	1
RNA	GTAGCCTTGGATTTCAAGCANGG	G-AGCCTTGGAggTgAAGaAAGG	1	41002576	+	4	1
RNA	GTAGCCTTGGATTTCAAGCANGG	a-AGCacTGGATTTgAAGCATGG	1	49747358	+	4	1
RNA	GTAGCCTTGGATTTCAAGCANGG	G-AGtCTTGaATaTCAtGCATGG	1	49774181	-	4	1
RNA	GTAGCCTTGGATTTCAAGCANGG	t-AttCTTGGATTTCcAGCATGG	3	4773709	-	4	1
RNA	GTAGCCTTGGATTTCAAGCANGG	a-AGtaTTGGATgTCAAGCATGG	3	12411882	+	4	1
RNA	GTAGCCTTGGATTTCAAGCANGG	G-AGCaaTtGATTTCAtGCATGG	3	14559912	-	4	1
RNA	GTAGCCTTGGATTTCAAGCANGG	c-AGCCTTaGATTaCAAGtAAGG	3	43745051	-	4	1
RNA	GTAGCCTTGGATTTCAAGCANGG	G-AtCCTTcaATTTCAAGtATGG	4	2717886	+	4	1
RNA	GTAGCCTTGGATTTCAAGCANGG	GTgGaaTTGG-TTTCAgGCAGGG	6	9560730	+	4	1
RNA	GTAGCCTTGGATTTCAAGCANGG	aTgGCCTTGt-TTTgAAGCAAGG	6	10237144	+	4	1
RNA	GTAGCCTTGGATTTCAAGCANGG	GTtGgCTTGa-aTTCAAGCAAGG	5	2323605	-	4	1
RNA	GTAGCCTTGGATTTCAAGCANGG	GTAGaCaTtG-TTTCAAGCtTGG	5	5993684	-	4	1
RNA	GTAGCCTTGGATTTCAAGCANGG	GTAGaCaTtG-TTTCAAGCtTGG	5	5993489	-	4	1
RNA	GTAGCCTTGGATTTCAAGCANGG	GTAGaCTTGG-TgTtAAGaAAGG	5	35617307	-	4	1
RNA	GTAGCCTTGGATTTCAAGCANGG	GTAGaCTTtG-TTcCAAGCtTGG	8	11196046	+	4	1
RNA	GTAGCCTTGGATTTCAAGCANGG	GTAGagTTGt-TTTCAAaCATGG	8	16484508	+	4	1
RNA	GTAGCCTTGGATTTCAAGCANGG	GTAGCCTTaG-cTTaAtGCATGG	8	28194863	+	4	1
RNA	GTAGCCTTGGATTTCAAGCANGG	tTAGCCaTGG-TggCAAGCAGGG	8	38297441	-	4	1
RNA	GTAGCCTTGGATTTCAAGCANGG	GcAGttTTGG-TTTaAAGCATGG	2	22362745	+	4	1
RNA	GTAGCCTTGGATTTCAAGCANGG	GTAGCCTTtG-cTTtAAGtAAGG	2	39536212	+	4	1
RNA	GTAGCCTTGGATTTCAAGCANGG	GTttCCTTGG-TTTCAAcCtTGG	7	33545753	+	4	1
RNA	GTAGCCTTGGATTTCAAGCANGG	aaAGCCTTGG-TTTtAAtCAAGG	7	37215480	-	4	1
RNA	GTAGCCTTGGATTTCAAGCANGG	GTAGtCTTtG-cTTtAAGCAAGG	1	1551432	+	4	1
RNA	GTAGCCTTGGATTTCAAGCANGG	GTtGCtTTGG-TTTCAAaaATGG	1	3381484	-	4	1
RNA	GTAGCCTTGGATTTCAAGCANGG	GTAaCCggGG-TTaCAAGCATGG	1	8772685	+	4	1
RNA	GTAGCCTTGGATTTCAAGCANGG	GTtGttTTGG-TTTgAAGCAAGG	1	29034844	+	4	1
RNA	GTAGCCTTGGATTTCAAGCANGG	GTAGtCTTtG-TTTtAAGCtTGG	3	30729567	-	4	1
RNA	GTAGCCTTGGATTTCAAGCANGG	GTgtCtTTGG-TTTCAAGgAGGG	4	6990372	-	4	1
RNA	GTAGCCTTGGATTTCAAGCANGG	GTcaCa-TGGtTTTCAAGCAGGG	scaffold0091	35511	+	4	1
RNA	GTAGCCTTGGATTTCAAGCANGG	GTcaCaT-GGtTTTCAAGCAGGG	scaffold0091	35511	+	4	1
RNA	GTAGCCTTGGATTTCAAGCANGG	GTcaCa-TGGtTTTCAAGCAGGG	scaffold0091	38743	-	4	1
RNA	GTAGCCTTGGATTTCAAGCANGG	GTcaCaT-GGtTTTCAAGCAGGG	scaffold0091	38743	-	4	1
RNA	GTAGCCTTGGATTTCAAGCANGG	GcAGtC-cGGATTTCAAGCtTGG	6	6211646	+	4	1
RNA	GTAGCCTTGGATTTCAAGCANGG	GcAGtCc-GGATTTCAAGCtTGG	6	6211646	+	4	1
RNA	GTAGCCTTGGATTTCAAGCANGG	GTgGCC-gGGATTTgAAcCACGG	6	12184554	-	4	1
RNA	GTAGCCTTGGATTTCAAGCANGG	GTgGCCg-GGATTTgAAcCACGG	6	12184554	-	4	1
RNA	GTAGCCTTGGATTTCAAGCANGG	agAcCC-TGcATTTCAAGCATGG	6	12737179	+	4	1
RNA	GTAGCCTTGGATTTCAAGCANGG	agAcCCT-GcATTTCAAGCATGG	6	12737179	+	4	1
RNA	GTAGCCTTGGATTTCAAGCANGG	agAaaC-TGGATTTCAAGCATGG	6	16994282	-	4	1
RNA	GTAGCCTTGGATTTCAAGCANGG	agAaaCT-GGATTTCAAGCATGG	6	16994282	-	4	1
RNA	GTAGCCTTGGATTTCAAGCANGG	GTAGCC-TtatTTTCAAGCtTGG	6	32675536	-	4	1
RNA	GTAGCCTTGGATTTCAAGCANGG	GTAGCCT-tatTTTCAAGCtTGG	6	32675536	-	4	1
RNA	GTAGCCTTGGATTTCAAGCANGG	agAaaC-TGGATTTCAAGCATGG	5	1183453	+	4	1
RNA	GTAGCCTTGGATTTCAAGCANGG	agAaaCT-GGATTTCAAGCATGG	5	1183453	+	4	1
RNA	GTAGCCTTGGATTTCAAGCANGG	GTtGgC-TtGAaTTCAAGCAAGG	5	2323605	-	4	1
RNA	GTAGCCTTGGATTTCAAGCANGG	GTtGgCT-tGAaTTCAAGCAAGG	5	2323605	-	4	1
RNA	GTAGCCTTGGATTTCAAGCANGG	cTAGCa-TGaATTTCAcGCAGGG	5	6536163	+	4	1
RNA	GTAGCCTTGGATTTCAAGCANGG	cTAGCaT-GaATTTCAcGCAGGG	5	6536163	+	4	1
RNA	GTAGCCTTGGATTTCAAGCANGG	GTgGtC-TaGATTTCAAGCtCGG	8	10558678	+	4	1
RNA	GTAGCCTTGGATTTCAAGCANGG	GTgGtCT-aGATTTCAAGCtCGG	8	10558678	+	4	1
RNA	GTAGCCTTGGATTTCAAGCANGG	GTAGtC-TGGATTTgAAcCtTGG	8	29603177	+	4	1
RNA	GTAGCCTTGGATTTCAAGCANGG	GTAGtCT-GGATTTgAAcCtTGG	8	29603177	+	4	1
RNA	GTAGCCTTGGATTTCAAGCANGG	GgAGCt-TGGATTaCAAGtATGG	2	517503	+	4	1
RNA	GTAGCCTTGGATTTCAAGCANGG	GgAGCtT-GGATTaCAAGtATGG	2	517503	+	4	1
RNA	GTAGCCTTGGATTTCAAGCANGG	GcAtCC-TGGATTTCAAaCcAGG	2	34688232	-	4	1
RNA	GTAGCCTTGGATTTCAAGCANGG	GcAtCCT-GGATTTCAAaCcAGG	2	34688232	-	4	1
RNA	GTAGCCTTGGATTTCAAGCANGG	GcAtCC-TGGATTTCAAaCcAGG	2	34710644	-	4	1
RNA	GTAGCCTTGGATTTCAAGCANGG	GcAtCCT-GGATTTCAAaCcAGG	2	34710644	-	4	1
RNA	GTAGCCTTGGATTTCAAGCANGG	GaAatC-TGGATTTCAAtCAAGG	7	38040420	+	4	1
RNA	GTAGCCTTGGATTTCAAGCANGG	GaAatCT-GGATTTCAAtCAAGG	7	38040420	+	4	1
RNA	GTAGCCTTGGATTTCAAGCANGG	GTtGCt-TGGcTTTCAAGaAGGG	1	4358859	-	4	1
RNA	GTAGCCTTGGATTTCAAGCANGG	GTtGCtT-GGcTTTCAAGaAGGG	1	4358859	-	4	1
RNA	GTAGCCTTGGATTTCAAGCANGG	caAaCC-TGGATTTCAAGCtTGG	1	8130688	+	4	1
RNA	GTAGCCTTGGATTTCAAGCANGG	caAaCCT-GGATTTCAAGCtTGG	1	8130688	+	4	1
RNA	GTAGCCTTGGATTTCAAGCANGG	GTAaCC-gGGgTTaCAAGCATGG	1	8772685	+	4	1
RNA	GTAGCCTTGGATTTCAAGCANGG	GTAaCCg-GGgTTaCAAGCATGG	1	8772685	+	4	1
RNA	GTAGCCTTGGATTTCAAGCANGG	GcAGCC-ccGAgTTCAAGCAGGG	1	19887653	+	4	1
RNA	GTAGCCTTGGATTTCAAGCANGG	GcAGCCc-cGAgTTCAAGCAGGG	1	19887653	+	4	1
RNA	GTAGCCTTGGATTTCAAGCANGG	GTAGCC-TacATaTCAAGCtTGG	3	17268540	+	4	1
RNA	GTAGCCTTGGATTTCAAGCANGG	GTAGCCT-acATaTCAAGCtTGG	3	17268540	+	4	1
RNA	GTAGCCTTGGATTTCAAGCANGG	GTAcCCcT-GAcTTCAcGCAGGG	scaffold0890	1874	+	4	1
RNA	GTAGCCTTGGATTTCAAGCANGG	GTAcCCcTG-AcTTCAcGCAGGG	scaffold0890	1874	+	4	1
RNA	GTAGCCTTGGATTTCAAGCANGG	GTAGCCTT-cATTTgAAatATGG	scaffold0156	19564	+	4	1
RNA	GTAGCCTTGGATTTCAAGCANGG	GTAGCCTTc-ATTTgAAatATGG	scaffold0156	19564	+	4	1
RNA	GTAGCCTTGGATTTCAAGCANGG	aTgGCCTT-GtTTTgAAGCAAGG	6	10237144	+	4	1
RNA	GTAGCCTTGGATTTCAAGCANGG	aTgGCCTTG-tTTTgAAGCAAGG	6	10237144	+	4	1
RNA	GTAGCCTTGGATTTCAAGCANGG	aTAGCgaT-GATTTCAAGgATGG	6	21768323	+	4	1
RNA	GTAGCCTTGGATTTCAAGCANGG	aTAGCgaTG-ATTTCAAGgATGG	6	21768323	+	4	1
RNA	GTAGCCTTGGATTTCAAGCANGG	tTAGCtTT-GATaaCAAGCAGGG	6	31409065	+	4	1
RNA	GTAGCCTTGGATTTCAAGCANGG	tTAGCtTTG-ATaaCAAGCAGGG	6	31409065	+	4	1
RNA	GTAGCCTTGGATTTCAAGCANGG	GTAGatTT-GATTTgAAtCAAGG	5	17407536	+	4	1
RNA	GTAGCCTTGGATTTCAAGCANGG	GTAGatTTG-ATTTgAAtCAAGG	5	17407536	+	4	1
RNA	GTAGCCTTGGATTTCAAGCANGG	GTAGCaTT-tATTTCAAaaAAGG	5	17883286	+	4	1
RNA	GTAGCCTTGGATTTCAAGCANGG	GTAGCaTTt-ATTTCAAaaAAGG	5	17883286	+	4	1
RNA	GTAGCCTTGGATTTCAAGCANGG	GcAGCCTT-tAaTTCAAGtAGGG	5	22215141	+	4	1
RNA	GTAGCCTTGGATTTCAAGCANGG	GcAGCCTTt-AaTTCAAGtAGGG	5	22215141	+	4	1
RNA	GTAGCCTTGGATTTCAAGCANGG	GTAGCCTT-GgTTctgAGCAAGG	5	24408604	-	4	1
RNA	GTAGCCTTGGATTTCAAGCANGG	GTAGCCTTG-gTTctgAGCAAGG	5	24408604	-	4	1
RNA	GTAGCCTTGGATTTCAAGCANGG	GaAttCTT-GAaTTCAAGCAAGG	5	26439779	+	4	1
RNA	GTAGCCTTGGATTTCAAGCANGG	GaAttCTTG-AaTTCAAGCAAGG	5	26439779	+	4	1
RNA	GTAGCCTTGGATTTCAAGCANGG	GaAttCTT-GAaTTCAAGCAAGG	5	26452044	+	4	1
RNA	GTAGCCTTGGATTTCAAGCANGG	GaAttCTTG-AaTTCAAGCAAGG	5	26452044	+	4	1
RNA	GTAGCCTTGGATTTCAAGCANGG	GTAGCCTg-cATTTCAAGtgGGG	5	34576517	+	4	1
RNA	GTAGCCTTGGATTTCAAGCANGG	GTAGCCTgc-ATTTCAAGtgGGG	5	34576517	+	4	1
RNA	GTAGCCTTGGATTTCAAGCANGG	GTAaCaaT-aATTTCAAGCAAGG	5	35173290	-	4	1
RNA	GTAGCCTTGGATTTCAAGCANGG	GTAaCaaTa-ATTTCAAGCAAGG	5	35173290	-	4	1
RNA	GTAGCCTTGGATTTCAAGCANGG	GaAGaCTT-GAaTTgAAGCAAGG	5	41569858	-	4	1
RNA	GTAGCCTTGGATTTCAAGCANGG	GaAGaCTTG-AaTTgAAGCAAGG	5	41569858	-	4	1
RNA	GTAGCCTTGGATTTCAAGCANGG	GTgGtCTa-GATTTCAAGCtCGG	8	10558678	+	4	1
RNA	GTAGCCTTGGATTTCAAGCANGG	GTgGtCTaG-ATTTCAAGCtCGG	8	10558678	+	4	1
RNA	GTAGCCTTGGATTTCAAGCANGG	GTAGagTT-GtTTTCAAaCATGG	8	16484508	+	4	1
RNA	GTAGCCTTGGATTTCAAGCANGG	GTAGagTTG-tTTTCAAaCATGG	8	16484508	+	4	1
RNA	GTAGCCTTGGATTTCAAGCANGG	GTtGCtTT-GATaTCAAGCgTGG	8	16672709	-	4	1
RNA	GTAGCCTTGGATTTCAAGCANGG	GTtGCtTTG-ATaTCAAGCgTGG	8	16672709	-	4	1
RNA	GTAGCCTTGGATTTCAAGCANGG	GgAGCtTT-GAaTTgAAGCATGG	2	2212182	-	4	1
RNA	GTAGCCTTGGATTTCAAGCANGG	GgAGCtTTG-AaTTgAAGCATGG	2	2212182	-	4	1
RNA	GTAGCCTTGGATTTCAAGCANGG	GcAGCCTT-aAaTTCAAGaAGGG	2	6245020	+	4	1
RNA	GTAGCCTTGGATTTCAAGCANGG	GcAGCCTTa-AaTTCAAGaAGGG	2	6245020	+	4	1
RNA	GTAGCCTTGGATTTCAAGCANGG	GTAatCcT-GATaTCAAGCATGG	7	62739	+	4	1
RNA	GTAGCCTTGGATTTCAAGCANGG	GTAatCcTG-ATaTCAAGCATGG	7	62739	+	4	1
RNA	GTAGCCTTGGATTTCAAGCANGG	GgAagCaT-GATTTCAAGCAAGG	7	17140417	-	4	1
RNA	GTAGCCTTGGATTTCAAGCANGG	GgAagCaTG-ATTTCAAGCAAGG	7	17140417	-	4	1
RNA	GTAGCCTTGGATTTCAAGCANGG	GcAGCCcc-GAgTTCAAGCAGGG	1	19887653	+	4	1
RNA	GTAGCCTTGGATTTCAAGCANGG	GcAGCCccG-AgTTCAAGCAGGG	1	19887653	+	4	1
RNA	GTAGCCTTGGATTTCAAGCANGG	tTAGCCTT-GATTTgAAagAAGG	1	50475281	+	4	1
RNA	GTAGCCTTGGATTTCAAGCANGG	tTAGCCTTG-ATTTgAAagAAGG	1	50475281	+	4	1
RNA	GTAGCCTTGGATTTCAAGCANGG	GctGCCTT-GATTTgAAGgATGG	3	6722563	+	4	1
RNA	GTAGCCTTGGATTTCAAGCANGG	GctGCCTTG-ATTTgAAGgATGG	3	6722563	+	4	1
RNA	GTAGCCTTGGATTTCAAGCANGG	GTAGCCTa-cATaTCAAGCtTGG	3	17268540	+	4	1
RNA	GTAGCCTTGGATTTCAAGCANGG	GTAGCCTac-ATaTCAAGCtTGG	3	17268540	+	4	1
RNA	GTAGCCTTGGATTTCAAGCANGG	GTAGgCTTcGATaTCAA-aAGGG	scaffold1240	1178	-	4	1
RNA	GTAGCCTTGGATTTCAAGCANGG	GTcGCCTTGaATTTCgg-CAAGG	scaffold1039	2332	-	4	1
RNA	GTAGCCTTGGATTTCAAGCANGG	tTAGCCTTtGATTTCAc-tAAGG	scaffold0014	80540	+	4	1
RNA	GTAGCCTTGGATTTCAAGCANGG	GTtGtCTTGGAgTTCAt-CAAGG	scaffold0011	75753	+	4	1
RNA	GTAGCCTTGGATTTCAAGCANGG	tTAGCCTTtGATTTCAc-tAAGG	6	603337	+	4	1
RNA	GTAGCCTTGGATTTCAAGCANGG	tTAGCCTTtGATTTCAc-tAAGG	6	2973196	+	4	1
RNA	GTAGCCTTGGATTTCAAGCANGG	tTAGCCTTtGATTTCAc-tAAGG	6	3808965	+	4	1
RNA	GTAGCCTTGGATTTCAAGCANGG	GTAGCgTTtGATTTttA-CAAGG	6	3816818	-	4	1
RNA	GTAGCCTTGGATTTCAAGCANGG	tTAGCCTTtGATTTCAc-tAAGG	6	17762877	-	4	1
RNA	GTAGCCTTGGATTTCAAGCANGG	GTAGgCTTcGATaTCAA-aAGGG	6	18641004	+	4	1
RNA	GTAGCCTTGGATTTCAAGCANGG	tTtGCtTTGcATTTCAA-CATGG	6	34064956	+	4	1
RNA	GTAGCCTTGGATTTCAAGCANGG	tTAGCCTTtGATTTCAc-tAAGG	5	213357	-	4	1
RNA	GTAGCCTTGGATTTCAAGCANGG	GTActaTTGGATTTaAA-CATGG	5	7996102	-	4	1
RNA	GTAGCCTTGGATTTCAAGCANGG	GTAGCCTTGGtTcTgAg-CAAGG	5	24408604	-	4	1
RNA	GTAGCCTTGGATTTCAAGCANGG	tTAGCCTTtGATTTCAc-tAAGG	5	27015420	-	4	1
RNA	GTAGCCTTGGATTTCAAGCANGG	tTAGCCTTtGATTTCAc-tAAGG	5	40147149	-	4	1
RNA	GTAGCCTTGGATTTCAAGCANGG	tTAGCCTTtGATTTCAc-tAAGG	8	4283412	-	4	1
RNA	GTAGCCTTGGATTTCAAGCANGG	GTAGCCTTaGATcTCtc-CAAGG	8	6339277	+	4	1
RNA	GTAGCCTTGGATTTCAAGCANGG	tTAGCCTTtGATTTCAc-tAAGG	8	11383874	-	4	1
RNA	GTAGCCTTGGATTTCAAGCANGG	tTAGCCTatGATTTCAA-tATGG	8	11942421	+	4	1
RNA	GTAGCCTTGGATTTCAAGCANGG	tTAGCCTatGATTTCAA-tATGG	8	11928816	-	4	1
RNA	GTAGCCTTGGATTTCAAGCANGG	GTAGgCTTcGATaTCAA-aAGGG	8	17743326	+	4	1
RNA	GTAGCCTTGGATTTCAAGCANGG	tTAGCCTTtGATTTCAc-tAAGG	8	18655289	-	4	1
RNA	GTAGCCTTGGATTTCAAGCANGG	GTAGgCTTaGATaTCAA-aAGGG	8	30530955	-	4	1
RNA	GTAGCCTTGGATTTCAAGCANGG	GgAGCCTTtGcTTTaAA-CATGG	8	30880895	-	4	1
RNA	GTAGCCTTGGATTTCAAGCANGG	tTAGCCTTtGATTTCAc-tAAGG	8	40221633	-	4	1
RNA	GTAGCCTTGGATTTCAAGCANGG	tTAGCCTTtGATTTCAc-tAAGG	8	42435248	+	4	1
RNA	GTAGCCTTGGATTTCAAGCANGG	GTtGgCTatGATTTCAA-CATGG	8	42323957	-	4	1
RNA	GTAGCCTTGGATTTCAAGCANGG	tTAGCtTTGaATTTtAA-CATGG	8	44511681	+	4	1
RNA	GTAGCCTTGGATTTCAAGCANGG	tTAGCCTTtGATTTCAc-tAAGG	2	1631989	+	4	1
RNA	GTAGCCTTGGATTTCAAGCANGG	GTtGtCTTaGATTTCAA-aAGGG	2	2797033	+	4	1
RNA	GTAGCCTTGGATTTCAAGCANGG	tcAGCCTgGcATTTCAA-CAAGG	2	3135475	+	4	1
RNA	GTAGCCTTGGATTTCAAGCANGG	GTAGCaTTGGcTTTCAA-gtTGG	2	6915453	+	4	1
RNA	GTAGCCTTGGATTTCAAGCANGG	aTgcCCTTGGATTTCcA-CAAGG	2	8149677	-	4	1
RNA	GTAGCCTTGGATTTCAAGCANGG	aTgcCCTTGGATTTCcA-CAAGG	2	8154301	-	4	1
RNA	GTAGCCTTGGATTTCAAGCANGG	GTAGgCTTcGATaTCAA-aAGGG	2	40880144	-	4	1
RNA	GTAGCCTTGGATTTCAAGCANGG	tTAGCCTTtGATTTCAc-tAAGG	2	42288367	+	4	1
RNA	GTAGCCTTGGATTTCAAGCANGG	tTAGCCTTtGATTTCAc-tAAGG	2	45726817	-	4	1
RNA	GTAGCCTTGGATTTCAAGCANGG	tTAGCCTTtGATTTCAc-tAAGG	7	2361228	+	4	1
RNA	GTAGCCTTGGATTTCAAGCANGG	tTAGCCTTtGATTTCAc-tAAGG	7	2390170	-	4	1
RNA	GTAGCCTTGGATTTCAAGCANGG	tTAGCCTTtGATTTCAc-tAAGG	7	4510805	+	4	1
RNA	GTAGCCTTGGATTTCAAGCANGG	tTAGCCTTtGATTTCAc-tAAGG	7	4512647	+	4	1
RNA	GTAGCCTTGGATTTCAAGCANGG	tTAGCCTTtGATTTCAc-tAAGG	7	4508963	+	4	1
RNA	GTAGCCTTGGATTTCAAGCANGG	tTAGCCTTtGATTTCAc-tAAGG	7	6360169	+	4	1
RNA	GTAGCCTTGGATTTCAAGCANGG	tTAGCCTTtGATTTCAc-tAAGG	7	8359575	+	4	1
RNA	GTAGCCTTGGATTTCAAGCANGG	GTActaTTGGATTTaAA-CATGG	7	8957187	-	4	1
RNA	GTAGCCTTGGATTTCAAGCANGG	GTAGCaTTGGcTTTCAA-gtTGG	7	15044004	-	4	1
RNA	GTAGCCTTGGATTTCAAGCANGG	cTctCCTTGGtTTTCAA-CATGG	7	26418998	+	4	1
RNA	GTAGCCTTGGATTTCAAGCANGG	tTAGCCTTtGATTTCAc-tAAGG	7	34310973	+	4	1
RNA	GTAGCCTTGGATTTCAAGCANGG	GTAGCCTTtGAcTcCAc-CAAGG	7	41295557	+	4	1
RNA	GTAGCCTTGGATTTCAAGCANGG	tTAGCCTTtGATTTCAc-tAAGG	7	48599591	+	4	1
RNA	GTAGCCTTGGATTTCAAGCANGG	tTAGCCTTtGATTTCAc-tAAGG	1	193499	-	4	1
RNA	GTAGCCTTGGATTTCAAGCANGG	GTccCCgTGGATTTCAA-gAAGG	1	6200354	-	4	1
RNA	GTAGCCTTGGATTTCAAGCANGG	tTAGCCTTtGATTTCAc-tAAGG	1	11348586	-	4	1
RNA	GTAGCCTTGGATTTCAAGCANGG	GTAGgCTTcGATaTCAA-aAGGG	1	17679671	-	4	1
RNA	GTAGCCTTGGATTTCAAGCANGG	tTAGCCTTtGATTTCAc-tAAGG	1	19752573	-	4	1
RNA	GTAGCCTTGGATTTCAAGCANGG	GTAtCCcTGGcTTTCAA-gACGG	1	27781761	+	4	1
RNA	GTAGCCTTGGATTTCAAGCANGG	aTAGCCTTtGATTTCAc-tAAGG	1	28242276	-	4	1
RNA	GTAGCCTTGGATTTCAAGCANGG	tTAGCCTTtGATTTCAc-tAAGG	1	29136135	-	4	1
RNA	GTAGCCTTGGATTTCAAGCANGG	tTAGCCTTtGATTTCAc-tAAGG	1	31925963	+	4	1
RNA	GTAGCCTTGGATTTCAAGCANGG	GTAGgCTTcGATaTCAA-aAGGG	1	33166009	+	4	1
RNA	GTAGCCTTGGATTTCAAGCANGG	aTAGCCTTtGATTTCAc-tAAGG	1	37033330	+	4	1
RNA	GTAGCCTTGGATTTCAAGCANGG	tTAGCCTTtGATTTCAc-tAAGG	1	37168185	-	4	1
RNA	GTAGCCTTGGATTTCAAGCANGG	tTAGCCTTtGATTTCAc-tAAGG	1	37879168	+	4	1
RNA	GTAGCCTTGGATTTCAAGCANGG	GTAcCaTTtaATTTCAA-CAAGG	1	44185785	-	4	1
RNA	GTAGCCTTGGATTTCAAGCANGG	GTAGCaTTGtATTaCAA-aAGGG	1	44627316	+	4	1
RNA	GTAGCCTTGGATTTCAAGCANGG	tTAGCCTTtGATTTCAt-tAAGG	1	47115059	-	4	1
RNA	GTAGCCTTGGATTTCAAGCANGG	GTAGgCTTcGATaTCAA-aAGGG	1	51521832	+	4	1
RNA	GTAGCCTTGGATTTCAAGCANGG	aTAtCCTTGGATTgaAA-CAAGG	3	3913976	-	4	1
RNA	GTAGCCTTGGATTTCAAGCANGG	GaAGCaaTGGAcTTCAA-CACGG	3	11410564	+	4	1
RNA	GTAGCCTTGGATTTCAAGCANGG	GgAGCtTTGGAcTTCAg-CATGG	3	25150260	-	4	1
RNA	GTAGCCTTGGATTTCAAGCANGG	tTAGCCTTcGATTTCAc-tAAGG	3	30236013	-	4	1
RNA	GTAGCCTTGGATTTCAAGCANGG	GTAGgCTTcGATaTCAA-aAGGG	3	33750320	+	4	1
RNA	GTAGCCTTGGATTTCAAGCANGG	GTAcCtTTaGATTgCAA-CAAGG	3	34707366	+	4	1
RNA	GTAGCCTTGGATTTCAAGCANGG	tTAGCCTTtGATTTCAc-tAAGG	3	34491101	-	4	1
RNA	GTAGCCTTGGATTTCAAGCANGG	aTAGCCTTtGATTTCAc-tAAGG	3	36018739	-	4	1
RNA	GTAGCCTTGGATTTCAAGCANGG	GTtaCCTTGGATaTCAA-CcTGG	3	42223017	+	4	1
RNA	GTAGCCTTGGATTTCAAGCANGG	aTAGCCTTtGATTTCAc-tAAGG	3	43402047	+	4	1
RNA	GTAGCCTTGGATTTCAAGCANGG	aTAGCCTTtGATTTCAc-tAAGG	3	43403990	+	4	1
RNA	GTAGCCTTGGATTTCAAGCANGG	tTAGCCTTtGATTTCAc-tAAGG	3	49199727	+	4	1
RNA	GTAGCCTTGGATTTCAAGCANGG	GTAGgCTTcGATaTCAA-aAGGG	3	50018630	+	4	1
RNA	GTAGCCTTGGATTTCAAGCANGG	GTAtaCTTGGAaTTCAA-CtAGG	3	54641667	-	4	1
RNA	GTAGCCTTGGATTTCAAGCANGG	tTAGCCTTtGATTTCAc-tAAGG	3	54593593	-	4	1
RNA	GTAGCCTTGGATTTCAAGCANGG	cTAGCCTTtGATTTCAc-tAAGG	3	55302222	+	4	1
RNA	GTAGCCTTGGATTTCAAGCANGG	GTtGtCTTtGATcTCAA-CATGG	4	2029818	+	4	1
RNA	GTAGCCTTGGATTTCAAGCANGG	aTAGCCTTtGATTTCAc-tAAGG	4	2209601	-	4	1
RNA	GTAGCCTTGGATTTCAAGCANGG	GTAGgCaTGGATTTCAA-gtGGG	4	6316368	+	4	1
RNA	GTAGCCTTGGATTTCAAGCANGG	GTc-aCaTGGtTTTCAAGCAGGG	scaffold0091	35511	+	4	1
RNA	GTAGCCTTGGATTTCAAGCANGG	GTc-aCaTGGtTTTCAAGCAGGG	scaffold0091	38743	-	4	1
RNA	GTAGCCTTGGATTTCAAGCANGG	GTA-CCTTGGATaTagAaCATGG	6	5321113	-	4	1
RNA	GTAGCCTTGGATTTCAAGCANGG	agA-CCcTGcATTTCAAGCATGG	6	12737179	+	4	1
RNA	GTAGCCTTGGATTTCAAGCANGG	GTA-CCTTGGtTTggAAGaAAGG	6	25377462	+	4	1
RNA	GTAGCCTTGGATTTCAAGCANGG	cTA-tCTTGtATTTCgAGCAAGG	6	26057956	+	4	1
RNA	GTAGCCTTGGATTTCAAGCANGG	cTA-tCTTGtATTTCgAGCAAGG	6	26077926	+	4	1
RNA	GTAGCCTTGGATTTCAAGCANGG	cTA-tCTTGtATTTCgAGCAAGG	6	26144904	+	4	1
RNA	GTAGCCTTGGATTTCAAGCANGG	tTA-CCTgGcATTTCAAGaAGGG	6	31784885	-	4	1
RNA	GTAGCCTTGGATTTCAAGCANGG	GTA-CCTTGcATTTaAcaCATGG	5	4823575	+	4	1
RNA	GTAGCCTTGGATTTCAAGCANGG	GTg-CaaTGGATTaCAAGCAAGG	5	17891000	-	4	1
RNA	GTAGCCTTGGATTTCAAGCANGG	GTA-CCTTGagaTTgAAGCAAGG	8	5859896	+	4	1
RNA	GTAGCCTTGGATTTCAAGCANGG	cTA-CCTTcaATTTCAAGCtTGG	8	14356743	+	4	1
RNA	GTAGCCTTGGATTTCAAGCANGG	GTA-CCaTGGATTTtAgGCtTGG	8	14313850	-	4	1
RNA	GTAGCCTTGGATTTCAAGCANGG	tTt-tCTTGGATTTCAgGCATGG	8	16103284	+	4	1
RNA	GTAGCCTTGGATTTCAAGCANGG	GgA-gCTTGGATTaCAAGtATGG	2	517503	+	4	1
RNA	GTAGCCTTGGATTTCAAGCANGG	GTA-CCTTGGATTcaAAtCtTGG	2	37816754	-	4	1
RNA	GTAGCCTTGGATTTCAAGCANGG	GcA-CCaTGGtTTTCAAaCAAGG	2	43238749	+	4	1
RNA	GTAGCCTTGGATTTCAAGCANGG	GTA-CCTgGGgcTaCAAGCAGGG	7	7493643	-	4	1
RNA	GTAGCCTTGGATTTCAAGCANGG	GTA-CCTTGGATTTgtAttATGG	7	37087136	-	4	1
RNA	GTAGCCTTGGATTTCAAGCANGG	GTt-gCTTGGcTTTCAAGaAGGG	1	4358859	-	4	1
RNA	GTAGCCTTGGATTTCAAGCANGG	tTA-tgTTGcATTTCAAGCATGG	1	12401741	-	4	1
RNA	GTAGCCTTGGATTTCAAGCANGG	GTA-CCTTcaAgTTCAAGaATGG	1	14072338	-	4	1
RNA	GTAGCCTTGGATTTCAAGCANGG	tTA-CCTTGGAcTgCAAGaATGG	1	20145104	-	4	1
RNA	GTAGCCTTGGATTTCAAGCANGG	tTA-CCTTtGtTTTCAAcCATGG	3	13961068	+	4	1
RNA	GTAGCCTTGGATTTCAAGCANGG	tTA-CCTTtGtTTTCAAcCATGG	3	15383635	-	4	1
RNA	GTAGCCTTGGATTTCAAGCANGG	GTA-CCTTGGATcgtAcGCAAGG	3	27305782	-	4	1
RNA	GTAGCCTTGGATTTCAAGCANGG	GTc-CCTTGGtTacCAAGCAAGG	3	28192895	-	4	1
RNA	GTAGCCTTGGATTTCAAGCANGG	aTA-CaTTGGATcTCAAGCtTGG	4	4925512	-	4	1
X	GTAGCCTTGGATTTCAAGCANGG	GagGCCTTtGATTTCAAGaATGG	6	18070003	-	4	0
X	GTAGCCTTGGATTTCAAGCANGG	GTAGtaaTGGATTTCAAtCAGGG	5	3767500	+	4	0
X	GTAGCCTTGGATTTCAAGCANGG	GTccCCTTGGAcTTgAAGCAAGG	5	6709178	-	4	0
X	GTAGCCTTGGATTTCAAGCANGG	GTAtCCTTGGtTTTaAAcCAAGG	5	34350859	+	4	0
X	GTAGCCTTGGATTTCAAGCANGG	GgAGCaTTtGATTTtAAGCAAGG	5	42401578	+	4	0
X	GTAGCCTTGGATTTCAAGCANGG	GTAGCCaTGGATcTCcAcCAAGG	7	37594564	-	4	0
X	GTAGCCTTGGATTTCAAGCANGG	tTAttCTTGGATTTCcAGCATGG	3	4773709	-	4	0
X	GTAGCCTTGGATTTCAAGCANGG	GTAGCaTTtGATTTCActCATGG	3	19314828	+	4	0
X	GTAGCCTTGGATTTCAAGCANGG	GcAGCCTTaGATTaCAAGtAAGG	3	43745051	-	4	0
RNA	GTAGCCTTGGATTTCAAGCANGG	GTca-CaTGGtTTTCAAGCAGGG	scaffold0091	35511	+	4	1
RNA	GTAGCCTTGGATTTCAAGCANGG	GTcaC-aTGGtTTTCAAGCAGGG	scaffold0091	35511	+	4	1
RNA	GTAGCCTTGGATTTCAAGCANGG	GTca-CaTGGtTTTCAAGCAGGG	scaffold0091	38743	-	4	1
RNA	GTAGCCTTGGATTTCAAGCANGG	GTcaC-aTGGtTTTCAAGCAGGG	scaffold0091	38743	-	4	1
RNA	GTAGCCTTGGATTTCAAGCANGG	cTAt-CTTGtATTTCgAGCAAGG	6	26077926	+	4	1
RNA	GTAGCCTTGGATTTCAAGCANGG	cTAtC-TTGtATTTCgAGCAAGG	6	26077926	+	4	1
RNA	GTAGCCTTGGATTTCAAGCANGG	cTAt-CTTGtATTTCgAGCAAGG	6	26057956	+	4	1
RNA	GTAGCCTTGGATTTCAAGCANGG	cTAtC-TTGtATTTCgAGCAAGG	6	26057956	+	4	1
RNA	GTAGCCTTGGATTTCAAGCANGG	cTAt-CTTGtATTTCgAGCAAGG	6	26144904	+	4	1
RNA	GTAGCCTTGGATTTCAAGCANGG	cTAtC-TTGtATTTCgAGCAAGG	6	26144904	+	4	1
RNA	GTAGCCTTGGATTTCAAGCANGG	tTAG-CTTtGATaaCAAGCAGGG	6	31409065	+	4	1
RNA	GTAGCCTTGGATTTCAAGCANGG	tTAGC-TTtGATaaCAAGCAGGG	6	31409065	+	4	1
RNA	GTAGCCTTGGATTTCAAGCANGG	aTAG-CTTaaATTTCcAGCATGG	5	913230	-	4	1
RNA	GTAGCCTTGGATTTCAAGCANGG	aTAGC-TTaaATTTCcAGCATGG	5	913230	-	4	1
RNA	GTAGCCTTGGATTTCAAGCANGG	GTgc-CTTGcATTTgAAGCATGG	5	2472022	+	4	1
RNA	GTAGCCTTGGATTTCAAGCANGG	GTgcC-TTGcATTTgAAGCATGG	5	2472022	+	4	1
RNA	GTAGCCTTGGATTTCAAGCANGG	cTAG-CaTGaATTTCAcGCAGGG	5	6536163	+	4	1
RNA	GTAGCCTTGGATTTCAAGCANGG	cTAGC-aTGaATTTCAcGCAGGG	5	6536163	+	4	1
RNA	GTAGCCTTGGATTTCAAGCANGG	GTAG-aTTtGATTTgAAtCAAGG	5	17407536	+	4	1
RNA	GTAGCCTTGGATTTCAAGCANGG	GTAGa-TTtGATTTgAAtCAAGG	5	17407536	+	4	1
RNA	GTAGCCTTGGATTTCAAGCANGG	GTAG-CcTGcATTTCAAGtgGGG	5	34576517	+	4	1
RNA	GTAGCCTTGGATTTCAAGCANGG	GTAGC-cTGcATTTCAAGtgGGG	5	34576517	+	4	1
RNA	GTAGCCTTGGATTTCAAGCANGG	tTtt-CTTGGATTTCAgGCATGG	8	16103284	+	4	1
RNA	GTAGCCTTGGATTTCAAGCANGG	tTttC-TTGGATTTCAgGCATGG	8	16103284	+	4	1
RNA	GTAGCCTTGGATTTCAAGCANGG	GTtG-CTTtGATaTCAAGCgTGG	8	16672709	-	4	1
RNA	GTAGCCTTGGATTTCAAGCANGG	GTtGC-TTtGATaTCAAGCgTGG	8	16672709	-	4	1
RNA	GTAGCCTTGGATTTCAAGCANGG	GTtG-CTTGGATTTtAcGCtAGG	8	27315712	-	4	1
RNA	GTAGCCTTGGATTTCAAGCANGG	GTtGC-TTGGATTTtAcGCtAGG	8	27315712	-	4	1
RNA	GTAGCCTTGGATTTCAAGCANGG	GgAG-CTTtGAaTTgAAGCATGG	2	2212182	-	4	1
RNA	GTAGCCTTGGATTTCAAGCANGG	GgAGC-TTtGAaTTgAAGCATGG	2	2212182	-	4	1
RNA	GTAGCCTTGGATTTCAAGCANGG	GTAG-tTTGatTTTCAAaCATGG	2	7067683	-	4	1
RNA	GTAGCCTTGGATTTCAAGCANGG	GTAGt-TTGatTTTCAAaCATGG	2	7067683	-	4	1
RNA	GTAGCCTTGGATTTCAAGCANGG	caAG-CTTGGAaaTCAAGCATGG	7	856407	+	4	1
RNA	GTAGCCTTGGATTTCAAGCANGG	caAGC-TTGGAaaTCAAGCATGG	7	856407	+	4	1
RNA	GTAGCCTTGGATTTCAAGCANGG	caAG-CTTGGAaaTCAAGCATGG	7	1214411	+	4	1
RNA	GTAGCCTTGGATTTCAAGCANGG	caAGC-TTGGAaaTCAAGCATGG	7	1214411	+	4	1
RNA	GTAGCCTTGGATTTCAAGCANGG	tagc-CTTGGATTTCAAGCATGG	7	19508665	+	4	1
RNA	GTAGCCTTGGATTTCAAGCANGG	tagcC-TTGGATTTCAAGCATGG	7	19508665	+	4	1
RNA	GTAGCCTTGGATTTCAAGCANGG	GTAc-CTTGGtTTaCAAGtAGGG	7	22505129	-	4	1
RNA	GTAGCCTTGGATTTCAAGCANGG	GTAcC-TTGGtTTaCAAGtAGGG	7	22505129	-	4	1
RNA	GTAGCCTTGGATTTCAAGCANGG	GTAG-CTTGctTggCAAGCATGG	7	26561928	+	4	1
RNA	GTAGCCTTGGATTTCAAGCANGG	GTAGC-TTGctTggCAAGCATGG	7	26561928	+	4	1
RNA	GTAGCCTTGGATTTCAAGCANGG	GTcG-CTTGGgTTTgAAcCACGG	1	10654439	+	4	1
RNA	GTAGCCTTGGATTTCAAGCANGG	GTcGC-TTGGgTTTgAAcCACGG	1	10654439	+	4	1
RNA	GTAGCCTTGGATTTCAAGCANGG	tTAt-gTTGcATTTCAAGCATGG	1	12401741	-	4	1
RNA	GTAGCCTTGGATTTCAAGCANGG	tTAtg-TTGcATTTCAAGCATGG	1	12401741	-	4	1
RNA	GTAGCCTTGGATTTCAAGCANGG	GTgG-aTTGcATTTCAAtCAAGG	1	44142588	-	4	1
RNA	GTAGCCTTGGATTTCAAGCANGG	GTgGa-TTGcATTTCAAtCAAGG	1	44142588	-	4	1
RNA	GTAGCCTTGGATTTCAAGCANGG	GTgG-aTTGcATTTCAAtCAAGG	1	44134154	-	4	1
RNA	GTAGCCTTGGATTTCAAGCANGG	GTgGa-TTGcATTTCAAtCAAGG	1	44134154	-	4	1
RNA	GTAGCCTTGGATTTCAAGCANGG	GTAG-tTgGGATTTCAtGaAAGG	3	26237130	-	4	1
RNA	GTAGCCTTGGATTTCAAGCANGG	GTAGt-TgGGATTTCAtGaAAGG	3	26237130	-	4	1
RNA	GTAGCCTTGGATTTCAAGCANGG	GTAG-aTTGaATcTaAAGCATGG	3	32872388	-	4	1
RNA	GTAGCCTTGGATTTCAAGCANGG	GTAGa-TTGaATcTaAAGCATGG	3	32872388	-	4	1
RNA	GTAGCCTTGGATTTCAAGCANGG	GTAG-aTaGGATTTtAAGaATGG	3	33789424	+	4	1
RNA	GTAGCCTTGGATTTCAAGCANGG	GTAGa-TaGGATTTtAAGaATGG	3	33789424	+	4	1
RNA	GTAGCCTTGGATTTCAAGCANGG	aTAG-CTTGGtTcTCAtGCAAGG	4	1162706	-	4	1
RNA	GTAGCCTTGGATTTCAAGCANGG	aTAGC-TTGGtTcTCAtGCAAGG	4	1162706	-	4	1
RNA	GTAGCCTTGGATTTCAAGCANGG	GTAGgCTTcGATaTCAAa-AGGG	scaffold1240	1178	-	4	1
RNA	GTAGCCTTGGATTTCAAGCANGG	GTAtCCTTGcATTcCgAG-ATGG	scaffold0191	29130	+	4	1
RNA	GTAGCCTTGGATTTCAAGCANGG	GTAagCTTtGATTTCAcG-ACGG	scaffold0162	99	+	4	1
RNA	GTAGCCTTGGATTTCAAGCANGG	aagGCCTTGaATTTCAAG-AGGG	scaffold0156	27419	-	4	1
RNA	GTAGCCTTGGATTTCAAGCANGG	GTccCCgTGaATTTCAAG-AAGG	scaffold0029	8294	-	4	1
RNA	GTAGCCTTGGATTTCAAGCANGG	tTAGCCTTtGATTTCAct-AAGG	scaffold0014	80540	+	4	1
RNA	GTAGCCTTGGATTTCAAGCANGG	tTAGCCTTtGATTTCAct-AAGG	6	603337	+	4	1
RNA	GTAGCCTTGGATTTCAAGCANGG	tTAGCCTTtGATTTCAct-AAGG	6	2973196	+	4	1
RNA	GTAGCCTTGGATTTCAAGCANGG	tTAGCCTTtGATTTCAct-AAGG	6	3808965	+	4	1
RNA	GTAGCCTTGGATTTCAAGCANGG	GTAGCtaTtaATTTCAAG-AAGG	6	9929742	-	4	1
RNA	GTAGCCTTGGATTTCAAGCANGG	tTAGCCTTtGATTTCAct-AAGG	6	17762877	-	4	1
RNA	GTAGCCTTGGATTTCAAGCANGG	GTAGgCTTcGATaTCAAa-AGGG	6	18641004	+	4	1
RNA	GTAGCCTTGGATTTCAAGCANGG	GTAGCCTTGGtTgTCttG-ATGG	6	24829888	-	4	1
RNA	GTAGCCTTGGATTTCAAGCANGG	GTAaCCTTGGATTcCttG-AAGG	6	29246601	+	4	1
RNA	GTAGCCTTGGATTTCAAGCANGG	tTAGCCTTtGATTTCAct-AAGG	5	213357	-	4	1
RNA	GTAGCCTTGGATTTCAAGCANGG	GTAGCCaTGaAaTTCAAG-tGGG	5	4961388	+	4	1
RNA	GTAGCCTTGGATTTCAAGCANGG	tTAGCCTTtGATTTCAct-AAGG	5	27015420	-	4	1
RNA	GTAGCCTTGGATTTCAAGCANGG	GTcctCTTGaATTTCAAG-AAGG	5	29898165	+	4	1
RNA	GTAGCCTTGGATTTCAAGCANGG	GTAGCtaTtaATTTCAAG-AAGG	5	40018209	-	4	1
RNA	GTAGCCTTGGATTTCAAGCANGG	tTAGCCTTtGATTTCAct-AAGG	5	40147149	-	4	1
RNA	GTAGCCTTGGATTTCAAGCANGG	GctGCtTTGGATTTgAAG-AGGG	8	1309301	-	4	1
RNA	GTAGCCTTGGATTTCAAGCANGG	GTAGCggTGGATTTCgAc-ATGG	8	1815341	-	4	1
RNA	GTAGCCTTGGATTTCAAGCANGG	tTAGCCTTtGATTTCAct-AAGG	8	4283412	-	4	1
RNA	GTAGCCTTGGATTTCAAGCANGG	tTAGCCTTtGATTTCAct-AAGG	8	11383874	-	4	1
RNA	GTAGCCTTGGATTTCAAGCANGG	tTAGCCTatGATTTCAAt-ATGG	8	11942421	+	4	1
RNA	GTAGCCTTGGATTTCAAGCANGG	tTAGCCTatGATTTCAAt-ATGG	8	11928816	-	4	1
RNA	GTAGCCTTGGATTTCAAGCANGG	GTAGgCTTcGATaTCAAa-AGGG	8	17743326	+	4	1
RNA	GTAGCCTTGGATTTCAAGCANGG	tTAGCCTTtGATTTCAct-AAGG	8	18655289	-	4	1
RNA	GTAGCCTTGGATTTCAAGCANGG	GTctCCaTGaATTTCAAG-AAGG	8	24702523	-	4	1
RNA	GTAGCCTTGGATTTCAAGCANGG	GTtcCaTTGcATTTCAAG-ATGG	8	28260134	-	4	1
RNA	GTAGCCTTGGATTTCAAGCANGG	GTAGgCTTaGATaTCAAa-AGGG	8	30530955	-	4	1
RNA	GTAGCCTTGGATTTCAAGCANGG	tTAGCCTTtGATTTCAct-AAGG	8	40221633	-	4	1
RNA	GTAGCCTTGGATTTCAAGCANGG	tTAGCCTTtGATTTCAct-AAGG	8	42435248	+	4	1
RNA	GTAGCCTTGGATTTCAAGCANGG	tTAGCCTTtGATTTCAct-AAGG	2	1631989	+	4	1
RNA	GTAGCCTTGGATTTCAAGCANGG	GTtGtCTTaGATTTCAAa-AGGG	2	2797033	+	4	1
RNA	GTAGCCTTGGATTTCAAGCANGG	tTgGatTTGGATTTCAAG-ATGG	2	11461003	+	4	1
RNA	GTAGCCTTGGATTTCAAGCANGG	aTAGCCaTGGATggCAAG-ATGG	2	29459359	+	4	1
RNA	GTAGCCTTGGATTTCAAGCANGG	aTAtCtaTGGATTTCAAG-AAGG	2	41108578	+	4	1
RNA	GTAGCCTTGGATTTCAAGCANGG	GTAGgCTTcGATaTCAAa-AGGG	2	40880144	-	4	1
RNA	GTAGCCTTGGATTTCAAGCANGG	tTAGCCTTtGATTTCAct-AAGG	2	42288367	+	4	1
RNA	GTAGCCTTGGATTTCAAGCANGG	GaAttCTTGGgTTTCAAG-ATGG	2	43185805	+	4	1
RNA	GTAGCCTTGGATTTCAAGCANGG	GaAGCacTGcATTTCAAG-ATGG	2	44832970	+	4	1
RNA	GTAGCCTTGGATTTCAAGCANGG	tTAGCCTTtGATTTCAct-AAGG	2	45726817	-	4	1
RNA	GTAGCCTTGGATTTCAAGCANGG	tTAGCCTTtGATTTCAct-AAGG	7	2361228	+	4	1
RNA	GTAGCCTTGGATTTCAAGCANGG	tTAGCCTTtGATTTCAct-AAGG	7	2390170	-	4	1
RNA	GTAGCCTTGGATTTCAAGCANGG	tTAGCCTTtGATTTCAct-AAGG	7	4508963	+	4	1
RNA	GTAGCCTTGGATTTCAAGCANGG	tTAGCCTTtGATTTCAct-AAGG	7	4510805	+	4	1
RNA	GTAGCCTTGGATTTCAAGCANGG	tTAGCCTTtGATTTCAct-AAGG	7	4512647	+	4	1
RNA	GTAGCCTTGGATTTCAAGCANGG	tTAGCCTTtGATTTCAct-AAGG	7	6360169	+	4	1
RNA	GTAGCCTTGGATTTCAAGCANGG	tTAGCCTTtGATTTCAct-AAGG	7	8359575	+	4	1
RNA	GTAGCCTTGGATTTCAAGCANGG	GTgGCCTctGATTTCcAG-AAGG	7	25231064	+	4	1
RNA	GTAGCCTTGGATTTCAAGCANGG	tTAtggTTGGATTTCAAG-AAGG	7	24922296	-	4	1
RNA	GTAGCCTTGGATTTCAAGCANGG	tTAGCCTTtGATTTCAct-AAGG	7	34310973	+	4	1
RNA	GTAGCCTTGGATTTCAAGCANGG	GTAGCCagGGATaTgAAG-AAGG	7	37306964	+	4	1
RNA	GTAGCCTTGGATTTCAAGCANGG	aTgGCCTTGGATgTCtAG-AAGG	7	40709450	+	4	1
RNA	GTAGCCTTGGATTTCAAGCANGG	tTAGCCTTtGATTTCAct-AAGG	7	48599591	+	4	1
RNA	GTAGCCTTGGATTTCAAGCANGG	tTAGCCTTtGATTTCAct-AAGG	1	193499	-	4	1
RNA	GTAGCCTTGGATTTCAAGCANGG	GTccCCgTGaATTTCAAG-AAGG	1	1064257	-	4	1
RNA	GTAGCCTTGGATTTCAAGCANGG	tTAGCCTTtGATTTCAct-AAGG	1	11348586	-	4	1
RNA	GTAGCCTTGGATTTCAAGCANGG	GTAGgCTTcGATaTCAAa-AGGG	1	17679671	-	4	1
RNA	GTAGCCTTGGATTTCAAGCANGG	tTAGCCTTtGATTTCAct-AAGG	1	19752573	-	4	1
RNA	GTAGCCTTGGATTTCAAGCANGG	aTAGCCTTtGATTTCAct-AAGG	1	28242276	-	4	1
RNA	GTAGCCTTGGATTTCAAGCANGG	tTAGCCTTtGATTTCAct-AAGG	1	29136135	-	4	1
RNA	GTAGCCTTGGATTTCAAGCANGG	tTAGCCTTtGATTTCAct-AAGG	1	31925963	+	4	1
RNA	GTAGCCTTGGATTTCAAGCANGG	GTAGgCTTcGATaTCAAa-AGGG	1	33166009	+	4	1
RNA	GTAGCCTTGGATTTCAAGCANGG	aTAGCCTTtGATTTCAct-AAGG	1	37033330	+	4	1
RNA	GTAGCCTTGGATTTCAAGCANGG	tTAGCCTTtGATTTCAct-AAGG	1	37168185	-	4	1
RNA	GTAGCCTTGGATTTCAAGCANGG	tTAGCCTTtGATTTCAct-AAGG	1	37879168	+	4	1
RNA	GTAGCCTTGGATTTCAAGCANGG	tTAtCCTTtGATTTCcAG-AAGG	1	42533635	+	4	1
RNA	GTAGCCTTGGATTTCAAGCANGG	GTAGCaTTGtATTaCAAa-AGGG	1	44627316	+	4	1
RNA	GTAGCCTTGGATTTCAAGCANGG	tTAGCCTTtGATTTCAtt-AAGG	1	47115059	-	4	1
RNA	GTAGCCTTGGATTTCAAGCANGG	GTAGgCTTcGATaTCAAa-AGGG	1	51521832	+	4	1
RNA	GTAGCCTTGGATTTCAAGCANGG	cTAGCCTTGctTTTgAAG-ATGG	3	28532349	-	4	1
RNA	GTAGCCTTGGATTTCAAGCANGG	tTAGCCTTcGATTTCAct-AAGG	3	30236013	-	4	1
RNA	GTAGCCTTGGATTTCAAGCANGG	GTAGgCTTcGATaTCAAa-AGGG	3	33750320	+	4	1
RNA	GTAGCCTTGGATTTCAAGCANGG	tTAGCCTTtGATTTCAct-AAGG	3	34491101	-	4	1
RNA	GTAGCCTTGGATTTCAAGCANGG	aTAGCCTTtGATTTCAct-AAGG	3	36018739	-	4	1
RNA	GTAGCCTTGGATTTCAAGCANGG	aTAGCCTTtGATTTCAct-AAGG	3	43402047	+	4	1
RNA	GTAGCCTTGGATTTCAAGCANGG	aTAGCCTTtGATTTCAct-AAGG	3	43403990	+	4	1
RNA	GTAGCCTTGGATTTCAAGCANGG	tTtGCCTTGGATTTtgAG-AAGG	3	46650816	-	4	1
RNA	GTAGCCTTGGATTTCAAGCANGG	tTAGCCTTtGATTTCAct-AAGG	3	49199727	+	4	1
RNA	GTAGCCTTGGATTTCAAGCANGG	GTAGgCTTcGATaTCAAa-AGGG	3	50018630	+	4	1
RNA	GTAGCCTTGGATTTCAAGCANGG	tTAGCCTTtGATTTCAct-AAGG	3	54593593	-	4	1
RNA	GTAGCCTTGGATTTCAAGCANGG	cTAGCCTTtGATTTCAct-AAGG	3	55302222	+	4	1
RNA	GTAGCCTTGGATTTCAAGCANGG	aTAGCCTTtGATTTCAct-AAGG	4	2209601	-	4	1
RNA	GTAGCCTTGGATTTCAAGCANGG	GaAGCCTTGGATgTa-tGCAAGG	scaffold0539	10953	-	4	1
RNA	GTAGCCTTGGATTTCAAGCANGG	GaAGCCTTGGATgTat-GCAAGG	scaffold0539	10953	-	4	1
RNA	GTAGCCTTGGATTTCAAGCANGG	tTAGCCTTtGATTTC-ActAAGG	scaffold0014	80540	+	4	1
RNA	GTAGCCTTGGATTTCAAGCANGG	tTAGCCTTtGATTTCA-ctAAGG	scaffold0014	80540	+	4	1
RNA	GTAGCCTTGGATTTCAAGCANGG	GTtGtCTTGGAgTTC-AtCAAGG	scaffold0011	75753	+	4	1
RNA	GTAGCCTTGGATTTCAAGCANGG	GTtGtCTTGGAgTTCA-tCAAGG	scaffold0011	75753	+	4	1
RNA	GTAGCCTTGGATTTCAAGCANGG	tTAGCCTTtGATTTC-ActAAGG	6	603337	+	4	1
RNA	GTAGCCTTGGATTTCAAGCANGG	tTAGCCTTtGATTTCA-ctAAGG	6	603337	+	4	1
RNA	GTAGCCTTGGATTTCAAGCANGG	tTAGCCTTtGATTTC-ActAAGG	6	2973196	+	4	1
RNA	GTAGCCTTGGATTTCAAGCANGG	tTAGCCTTtGATTTCA-ctAAGG	6	2973196	+	4	1
RNA	GTAGCCTTGGATTTCAAGCANGG	tTAGCCTTtGATTTC-ActAAGG	6	3808965	+	4	1
RNA	GTAGCCTTGGATTTCAAGCANGG	tTAGCCTTtGATTTCA-ctAAGG	6	3808965	+	4	1
RNA	GTAGCCTTGGATTTCAAGCANGG	tTAGCCTTtGATTTC-ActAAGG	6	17762877	-	4	1
RNA	GTAGCCTTGGATTTCAAGCANGG	tTAGCCTTtGATTTCA-ctAAGG	6	17762877	-	4	1
RNA	GTAGCCTTGGATTTCAAGCANGG	tTAGCCTTtGATTTC-ActAAGG	5	213357	-	4	1
RNA	GTAGCCTTGGATTTCAAGCANGG	tTAGCCTTtGATTTCA-ctAAGG	5	213357	-	4	1
RNA	GTAGCCTTGGATTTCAAGCANGG	GTAGgaTTtGATTTC-AGaATGG	5	3145860	-	4	1
RNA	GTAGCCTTGGATTTCAAGCANGG	GTAGgaTTtGATTTCA-GaATGG	5	3145860	-	4	1
RNA	GTAGCCTTGGATTTCAAGCANGG	tTAGCCTTtGATTTC-ActAAGG	5	27015420	-	4	1
RNA	GTAGCCTTGGATTTCAAGCANGG	tTAGCCTTtGATTTCA-ctAAGG	5	27015420	-	4	1
RNA	GTAGCCTTGGATTTCAAGCANGG	tTAGCCTTtGATTTC-AatAAGG	5	38746893	-	4	1
RNA	GTAGCCTTGGATTTCAAGCANGG	tTAGCCTTtGATTTCA-atAAGG	5	38746893	-	4	1
RNA	GTAGCCTTGGATTTCAAGCANGG	tTAGCCTTtGATTTC-ActAAGG	5	40147149	-	4	1
RNA	GTAGCCTTGGATTTCAAGCANGG	tTAGCCTTtGATTTCA-ctAAGG	5	40147149	-	4	1
RNA	GTAGCCTTGGATTTCAAGCANGG	GTAGCggTGGATTTC-gaCATGG	8	1815341	-	4	1
RNA	GTAGCCTTGGATTTCAAGCANGG	GTAGCggTGGATTTCg-aCATGG	8	1815341	-	4	1
RNA	GTAGCCTTGGATTTCAAGCANGG	tTAGCCTTtGATTTC-ActAAGG	8	4283412	-	4	1
RNA	GTAGCCTTGGATTTCAAGCANGG	tTAGCCTTtGATTTCA-ctAAGG	8	4283412	-	4	1
RNA	GTAGCCTTGGATTTCAAGCANGG	GTAGCCTTaGATcTC-tcCAAGG	8	6339277	+	4	1
RNA	GTAGCCTTGGATTTCAAGCANGG	GTAGCCTTaGATcTCt-cCAAGG	8	6339277	+	4	1
RNA	GTAGCCTTGGATTTCAAGCANGG	tTAGCCTTtGATTTC-ActAAGG	8	11383874	-	4	1
RNA	GTAGCCTTGGATTTCAAGCANGG	tTAGCCTTtGATTTCA-ctAAGG	8	11383874	-	4	1
RNA	GTAGCCTTGGATTTCAAGCANGG	GTgaCCTTcGATTTt-AGCAAGG	8	14939778	-	4	1
RNA	GTAGCCTTGGATTTCAAGCANGG	GTgaCCTTcGATTTtA-GCAAGG	8	14939778	-	4	1
RNA	GTAGCCTTGGATTTCAAGCANGG	tTAGCCTTtGATTTC-ActAAGG	8	18655289	-	4	1
RNA	GTAGCCTTGGATTTCAAGCANGG	tTAGCCTTtGATTTCA-ctAAGG	8	18655289	-	4	1
RNA	GTAGCCTTGGATTTCAAGCANGG	tTAGCCTTtGATTTC-ActAAGG	8	40221633	-	4	1
RNA	GTAGCCTTGGATTTCAAGCANGG	tTAGCCTTtGATTTCA-ctAAGG	8	40221633	-	4	1
RNA	GTAGCCTTGGATTTCAAGCANGG	tTAGCCTTtGATTTC-ActAAGG	8	42435248	+	4	1
RNA	GTAGCCTTGGATTTCAAGCANGG	tTAGCCTTtGATTTCA-ctAAGG	8	42435248	+	4	1
RNA	GTAGCCTTGGATTTCAAGCANGG	tTAGCCTTtGATTTC-ActAAGG	2	1631989	+	4	1
RNA	GTAGCCTTGGATTTCAAGCANGG	tTAGCCTTtGATTTCA-ctAAGG	2	1631989	+	4	1
RNA	GTAGCCTTGGATTTCAAGCANGG	GTAGCCTTtGcTTTa-AGtAAGG	2	39536212	+	4	1
RNA	GTAGCCTTGGATTTCAAGCANGG	GTAGCCTTtGcTTTaA-GtAAGG	2	39536212	+	4	1
RNA	GTAGCCTTGGATTTCAAGCANGG	tTAGCCTTtGATTTC-ActAAGG	2	42288367	+	4	1
RNA	GTAGCCTTGGATTTCAAGCANGG	tTAGCCTTtGATTTCA-ctAAGG	2	42288367	+	4	1
RNA	GTAGCCTTGGATTTCAAGCANGG	tTAGCCTTtGATTTC-ActAAGG	2	45726817	-	4	1
RNA	GTAGCCTTGGATTTCAAGCANGG	tTAGCCTTtGATTTCA-ctAAGG	2	45726817	-	4	1
RNA	GTAGCCTTGGATTTCAAGCANGG	tTAGCCTTtGATTTC-ActAAGG	7	2361228	+	4	1
RNA	GTAGCCTTGGATTTCAAGCANGG	tTAGCCTTtGATTTCA-ctAAGG	7	2361228	+	4	1
RNA	GTAGCCTTGGATTTCAAGCANGG	tTAGCCTTtGATTTC-ActAAGG	7	2390170	-	4	1
RNA	GTAGCCTTGGATTTCAAGCANGG	tTAGCCTTtGATTTCA-ctAAGG	7	2390170	-	4	1
RNA	GTAGCCTTGGATTTCAAGCANGG	tTAGCCTTtGATTTC-ActAAGG	7	4508963	+	4	1
RNA	GTAGCCTTGGATTTCAAGCANGG	tTAGCCTTtGATTTCA-ctAAGG	7	4508963	+	4	1
RNA	GTAGCCTTGGATTTCAAGCANGG	tTAGCCTTtGATTTC-ActAAGG	7	4512647	+	4	1
RNA	GTAGCCTTGGATTTCAAGCANGG	tTAGCCTTtGATTTCA-ctAAGG	7	4512647	+	4	1
RNA	GTAGCCTTGGATTTCAAGCANGG	tTAGCCTTtGATTTC-ActAAGG	7	4510805	+	4	1
RNA	GTAGCCTTGGATTTCAAGCANGG	tTAGCCTTtGATTTCA-ctAAGG	7	4510805	+	4	1
RNA	GTAGCCTTGGATTTCAAGCANGG	tTAGCCTTtGATTTC-ActAAGG	7	6360169	+	4	1
RNA	GTAGCCTTGGATTTCAAGCANGG	tTAGCCTTtGATTTCA-ctAAGG	7	6360169	+	4	1
RNA	GTAGCCTTGGATTTCAAGCANGG	tTAGCCTTtGATTTC-ActAAGG	7	8359575	+	4	1
RNA	GTAGCCTTGGATTTCAAGCANGG	tTAGCCTTtGATTTCA-ctAAGG	7	8359575	+	4	1
RNA	GTAGCCTTGGATTTCAAGCANGG	tTAGCCTTtGATTTC-ActAAGG	7	34310973	+	4	1
RNA	GTAGCCTTGGATTTCAAGCANGG	tTAGCCTTtGATTTCA-ctAAGG	7	34310973	+	4	1
RNA	GTAGCCTTGGATTTCAAGCANGG	GTAGCCTTtGAcTcC-AcCAAGG	7	41295557	+	4	1
RNA	GTAGCCTTGGATTTCAAGCANGG	GTAGCCTTtGAcTcCA-cCAAGG	7	41295557	+	4	1
RNA	GTAGCCTTGGATTTCAAGCANGG	GctGCtTTGaATTTC-AGCAGGG	7	42384839	-	4	1
RNA	GTAGCCTTGGATTTCAAGCANGG	GctGCtTTGaATTTCA-GCAGGG	7	42384839	-	4	1
RNA	GTAGCCTTGGATTTCAAGCANGG	tTAGCCTTtGATTTC-ActAAGG	7	48599591	+	4	1
RNA	GTAGCCTTGGATTTCAAGCANGG	tTAGCCTTtGATTTCA-ctAAGG	7	48599591	+	4	1
RNA	GTAGCCTTGGATTTCAAGCANGG	tTAGCCTTtGATTTC-ActAAGG	1	193499	-	4	1
RNA	GTAGCCTTGGATTTCAAGCANGG	tTAGCCTTtGATTTCA-ctAAGG	1	193499	-	4	1
RNA	GTAGCCTTGGATTTCAAGCANGG	GTAGtCTTtGcTTTa-AGCAAGG	1	1551432	+	4	1
RNA	GTAGCCTTGGATTTCAAGCANGG	GTAGtCTTtGcTTTaA-GCAAGG	1	1551432	+	4	1
RNA	GTAGCCTTGGATTTCAAGCANGG	tTAGCCTTtGATTTC-ActAAGG	1	11348586	-	4	1
RNA	GTAGCCTTGGATTTCAAGCANGG	tTAGCCTTtGATTTCA-ctAAGG	1	11348586	-	4	1
RNA	GTAGCCTTGGATTTCAAGCANGG	aTAGCCTTGGAaTTt-gGCAAGG	1	14619275	-	4	1
RNA	GTAGCCTTGGATTTCAAGCANGG	aTAGCCTTGGAaTTtg-GCAAGG	1	14619275	-	4	1
RNA	GTAGCCTTGGATTTCAAGCANGG	tTAGCCTTtGATTTC-ActAAGG	1	19752573	-	4	1
RNA	GTAGCCTTGGATTTCAAGCANGG	tTAGCCTTtGATTTCA-ctAAGG	1	19752573	-	4	1
RNA	GTAGCCTTGGATTTCAAGCANGG	aTAGCCTTtGATTTC-ActAAGG	1	28242276	-	4	1
RNA	GTAGCCTTGGATTTCAAGCANGG	aTAGCCTTtGATTTCA-ctAAGG	1	28242276	-	4	1
RNA	GTAGCCTTGGATTTCAAGCANGG	tTAGCCTTtGATTTC-ActAAGG	1	29136135	-	4	1
RNA	GTAGCCTTGGATTTCAAGCANGG	tTAGCCTTtGATTTCA-ctAAGG	1	29136135	-	4	1
RNA	GTAGCCTTGGATTTCAAGCANGG	tTAGCCTTtGATTTC-ActAAGG	1	31925963	+	4	1
RNA	GTAGCCTTGGATTTCAAGCANGG	tTAGCCTTtGATTTCA-ctAAGG	1	31925963	+	4	1
RNA	GTAGCCTTGGATTTCAAGCANGG	GcAGCCaTGGAaTTC-cGCATGG	1	35666232	-	4	1
RNA	GTAGCCTTGGATTTCAAGCANGG	GcAGCCaTGGAaTTCc-GCATGG	1	35666232	-	4	1
RNA	GTAGCCTTGGATTTCAAGCANGG	aTAGCCTTtGATTTC-ActAAGG	1	37033330	+	4	1
RNA	GTAGCCTTGGATTTCAAGCANGG	aTAGCCTTtGATTTCA-ctAAGG	1	37033330	+	4	1
RNA	GTAGCCTTGGATTTCAAGCANGG	tTAGCCTTtGATTTC-ActAAGG	1	37168185	-	4	1
RNA	GTAGCCTTGGATTTCAAGCANGG	tTAGCCTTtGATTTCA-ctAAGG	1	37168185	-	4	1
RNA	GTAGCCTTGGATTTCAAGCANGG	tTAGCCTTtGATTTC-ActAAGG	1	37879168	+	4	1
RNA	GTAGCCTTGGATTTCAAGCANGG	tTAGCCTTtGATTTCA-ctAAGG	1	37879168	+	4	1
RNA	GTAGCCTTGGATTTCAAGCANGG	tTAGCCTTtGATTTC-AttAAGG	1	47115059	-	4	1
RNA	GTAGCCTTGGATTTCAAGCANGG	tTAGCCTTtGATTTCA-ttAAGG	1	47115059	-	4	1
RNA	GTAGCCTTGGATTTCAAGCANGG	GcAcCCTTGGAcTTC-AGaAGGG	3	172839	-	4	1
RNA	GTAGCCTTGGATTTCAAGCANGG	GcAcCCTTGGAcTTCA-GaAGGG	3	172839	-	4	1
RNA	GTAGCCTTGGATTTCAAGCANGG	GTAGatTTGGATTTC-AatATGG	3	1609497	+	4	1
RNA	GTAGCCTTGGATTTCAAGCANGG	GTAGatTTGGATTTCA-atATGG	3	1609497	+	4	1
RNA	GTAGCCTTGGATTTCAAGCANGG	GTgGttTTGGAgTTC-AGCAAGG	3	1495899	-	4	1
RNA	GTAGCCTTGGATTTCAAGCANGG	GTgGttTTGGAgTTCA-GCAAGG	3	1495899	-	4	1
RNA	GTAGCCTTGGATTTCAAGCANGG	tTAGCCTTcGATTTC-ActAAGG	3	30236013	-	4	1
RNA	GTAGCCTTGGATTTCAAGCANGG	tTAGCCTTcGATTTCA-ctAAGG	3	30236013	-	4	1
RNA	GTAGCCTTGGATTTCAAGCANGG	tTAGCCTTtGATTTC-ActAAGG	3	34491101	-	4	1
RNA	GTAGCCTTGGATTTCAAGCANGG	tTAGCCTTtGATTTCA-ctAAGG	3	34491101	-	4	1
RNA	GTAGCCTTGGATTTCAAGCANGG	aTAGCCTTtGATTTC-ActAAGG	3	36018739	-	4	1
RNA	GTAGCCTTGGATTTCAAGCANGG	aTAGCCTTtGATTTCA-ctAAGG	3	36018739	-	4	1
RNA	GTAGCCTTGGATTTCAAGCANGG	aTAGCCTTtGATTTC-ActAAGG	3	43402047	+	4	1
RNA	GTAGCCTTGGATTTCAAGCANGG	aTAGCCTTtGATTTCA-ctAAGG	3	43402047	+	4	1
RNA	GTAGCCTTGGATTTCAAGCANGG	aTAGCCTTtGATTTC-ActAAGG	3	43403990	+	4	1
RNA	GTAGCCTTGGATTTCAAGCANGG	aTAGCCTTtGATTTCA-ctAAGG	3	43403990	+	4	1
RNA	GTAGCCTTGGATTTCAAGCANGG	tTAGCCTTtGATTTC-ActAAGG	3	49199727	+	4	1
RNA	GTAGCCTTGGATTTCAAGCANGG	tTAGCCTTtGATTTCA-ctAAGG	3	49199727	+	4	1
RNA	GTAGCCTTGGATTTCAAGCANGG	tTAGCCTTtGATTTC-ActAAGG	3	54593593	-	4	1
RNA	GTAGCCTTGGATTTCAAGCANGG	tTAGCCTTtGATTTCA-ctAAGG	3	54593593	-	4	1
RNA	GTAGCCTTGGATTTCAAGCANGG	agAGtCTTGGATTTC-AGaATGG	3	55197595	+	4	1
RNA	GTAGCCTTGGATTTCAAGCANGG	agAGtCTTGGATTTCA-GaATGG	3	55197595	+	4	1
RNA	GTAGCCTTGGATTTCAAGCANGG	cTAGCCTTtGATTTC-ActAAGG	3	55302222	+	4	1
RNA	GTAGCCTTGGATTTCAAGCANGG	cTAGCCTTtGATTTCA-ctAAGG	3	55302222	+	4	1
RNA	GTAGCCTTGGATTTCAAGCANGG	aTAGCCTTtGATTTC-ActAAGG	4	2209601	-	4	1
RNA	GTAGCCTTGGATTTCAAGCANGG	aTAGCCTTtGATTTCA-ctAAGG	4	2209601	-	4	1
RNA	GTAGCCTTGGATTTCAAGCANGG	GcAGCCTTGGgTTTt-tGCATGG	4	5128680	+	4	1
RNA	GTAGCCTTGGATTTCAAGCANGG	GcAGCCTTGGgTTTtt-GCATGG	4	5128680	+	4	1
RNA	GTAGCCTTGGATTTCAAGCANGG	GaAGCCTTGGA-TgtAtGCAAGG	scaffold0539	10953	-	4	1
RNA	GTAGCCTTGGATTTCAAGCANGG	GaAGCCTTGGAT-gtAtGCAAGG	scaffold0539	10953	-	4	1
RNA	GTAGCCTTGGATTTCAAGCANGG	GaAGCCTTGGATg-tAtGCAAGG	scaffold0539	10953	-	4	1
RNA	GTAGCCTTGGATTTCAAGCANGG	GTttaCTTGGA-TTCAtGCATGG	scaffold0127	19941	+	4	1
RNA	GTAGCCTTGGATTTCAAGCANGG	GTttaCTTGGAT-TCAtGCATGG	scaffold0127	19941	+	4	1
RNA	GTAGCCTTGGATTTCAAGCANGG	GTttaCTTGGATT-CAtGCATGG	scaffold0127	19941	+	4	1
RNA	GTAGCCTTGGATTTCAAGCANGG	GTttaCTTGGA-TTCAtGCATGG	6	5748298	-	4	1
RNA	GTAGCCTTGGATTTCAAGCANGG	GTttaCTTGGAT-TCAtGCATGG	6	5748298	-	4	1
RNA	GTAGCCTTGGATTTCAAGCANGG	GTttaCTTGGATT-CAtGCATGG	6	5748298	-	4	1
RNA	GTAGCCTTGGATTTCAAGCANGG	GTttaCTTGGA-TTCAtGCATGG	6	5858651	-	4	1
RNA	GTAGCCTTGGATTTCAAGCANGG	GTttaCTTGGAT-TCAtGCATGG	6	5858651	-	4	1
RNA	GTAGCCTTGGATTTCAAGCANGG	GTttaCTTGGATT-CAtGCATGG	6	5858651	-	4	1
RNA	GTAGCCTTGGATTTCAAGCANGG	GTAGCCTTatt-TTCAAGCtTGG	6	32675536	-	4	1
RNA	GTAGCCTTGGATTTCAAGCANGG	GTAGCCTTattT-TCAAGCtTGG	6	32675536	-	4	1
RNA	GTAGCCTTGGATTTCAAGCANGG	GTAGCCTTattTT-CAAGCtTGG	6	32675536	-	4	1
RNA	GTAGCCTTGGATTTCAAGCANGG	GTtGtgTTGtA-TTCAAGCAAGG	5	1401971	-	4	1
RNA	GTAGCCTTGGATTTCAAGCANGG	GTtGtgTTGtAT-TCAAGCAAGG	5	1401971	-	4	1
RNA	GTAGCCTTGGATTTCAAGCANGG	GTtGtgTTGtATT-CAAGCAAGG	5	1401971	-	4	1
RNA	GTAGCCTTGGATTTCAAGCANGG	GcAGCCTTtaA-TTCAAGtAGGG	5	22215141	+	4	1
RNA	GTAGCCTTGGATTTCAAGCANGG	GcAGCCTTtaAT-TCAAGtAGGG	5	22215141	+	4	1
RNA	GTAGCCTTGGATTTCAAGCANGG	GcAGCCTTtaATT-CAAGtAGGG	5	22215141	+	4	1
RNA	GTAGCCTTGGATTTCAAGCANGG	GTAGCCTTGGt-TctgAGCAAGG	5	24408604	-	4	1
RNA	GTAGCCTTGGATTTCAAGCANGG	GTAGCCTTGGtT-ctgAGCAAGG	5	24408604	-	4	1
RNA	GTAGCCTTGGATTTCAAGCANGG	GTAGCCTTGGtTc-tgAGCAAGG	5	24408604	-	4	1
RNA	GTAGCCTTGGATTTCAAGCANGG	GaAttCTTGaA-TTCAAGCAAGG	5	26439779	+	4	1
RNA	GTAGCCTTGGATTTCAAGCANGG	GaAttCTTGaAT-TCAAGCAAGG	5	26439779	+	4	1
RNA	GTAGCCTTGGATTTCAAGCANGG	GaAttCTTGaATT-CAAGCAAGG	5	26439779	+	4	1
RNA	GTAGCCTTGGATTTCAAGCANGG	GaAttCTTGaA-TTCAAGCAAGG	5	26452044	+	4	1
RNA	GTAGCCTTGGATTTCAAGCANGG	GaAttCTTGaAT-TCAAGCAAGG	5	26452044	+	4	1
RNA	GTAGCCTTGGATTTCAAGCANGG	GaAttCTTGaATT-CAAGCAAGG	5	26452044	+	4	1
RNA	GTAGCCTTGGATTTCAAGCANGG	GgAGCgTTGGA-TTgAAcCAGGG	5	37742332	+	4	1
RNA	GTAGCCTTGGATTTCAAGCANGG	GgAGCgTTGGAT-TgAAcCAGGG	5	37742332	+	4	1
RNA	GTAGCCTTGGATTTCAAGCANGG	GgAGCgTTGGATT-gAAcCAGGG	5	37742332	+	4	1
RNA	GTAGCCTTGGATTTCAAGCANGG	GgAGCgTTGGA-TTgAAcCAGGG	5	37776414	+	4	1
RNA	GTAGCCTTGGATTTCAAGCANGG	GgAGCgTTGGAT-TgAAcCAGGG	5	37776414	+	4	1
RNA	GTAGCCTTGGATTTCAAGCANGG	GgAGCgTTGGATT-gAAcCAGGG	5	37776414	+	4	1
RNA	GTAGCCTTGGATTTCAAGCANGG	GaAGaCTTGaA-TTgAAGCAAGG	5	41569858	-	4	1
RNA	GTAGCCTTGGATTTCAAGCANGG	GaAGaCTTGaAT-TgAAGCAAGG	5	41569858	-	4	1
RNA	GTAGCCTTGGATTTCAAGCANGG	GaAGaCTTGaATT-gAAGCAAGG	5	41569858	-	4	1
RNA	GTAGCCTTGGATTTCAAGCANGG	tTAGCCTTGGA-TgCAgGtATGG	5	42497801	-	4	1
RNA	GTAGCCTTGGATTTCAAGCANGG	tTAGCCTTGGAT-gCAgGtATGG	5	42497801	-	4	1
RNA	GTAGCCTTGGATTTCAAGCANGG	tTAGCCTTGGATg-CAgGtATGG	5	42497801	-	4	1
RNA	GTAGCCTTGGATTTCAAGCANGG	GTAtCCTTtGA-TTCAcaCATGG	8	11270247	-	4	1
RNA	GTAGCCTTGGATTTCAAGCANGG	GTAtCCTTtGAT-TCAcaCATGG	8	11270247	-	4	1
RNA	GTAGCCTTGGATTTCAAGCANGG	GTAtCCTTtGATT-CAcaCATGG	8	11270247	-	4	1
RNA	GTAGCCTTGGATTTCAAGCANGG	GaAtCaTTGtA-TTCAAGCAGGG	8	13172165	-	4	1
RNA	GTAGCCTTGGATTTCAAGCANGG	GaAtCaTTGtAT-TCAAGCAGGG	8	13172165	-	4	1
RNA	GTAGCCTTGGATTTCAAGCANGG	GaAtCaTTGtATT-CAAGCAGGG	8	13172165	-	4	1
RNA	GTAGCCTTGGATTTCAAGCANGG	GTAGCCTTaGc-TTaAtGCATGG	8	28194863	+	4	1
RNA	GTAGCCTTGGATTTCAAGCANGG	GTAGCCTTaGcT-TaAtGCATGG	8	28194863	+	4	1
RNA	GTAGCCTTGGATTTCAAGCANGG	GTAGCCTTaGcTT-aAtGCATGG	8	28194863	+	4	1
RNA	GTAGCCTTGGATTTCAAGCANGG	GaAGCCTTGGA-TaaAAGtAAGG	8	44450030	+	4	1
RNA	GTAGCCTTGGATTTCAAGCANGG	GaAGCCTTGGAT-aaAAGtAAGG	8	44450030	+	4	1
RNA	GTAGCCTTGGATTTCAAGCANGG	GaAGCCTTGGATa-aAAGtAAGG	8	44450030	+	4	1
RNA	GTAGCCTTGGATTTCAAGCANGG	GgAGCtTTGaA-TTgAAGCATGG	2	2212182	-	4	1
RNA	GTAGCCTTGGATTTCAAGCANGG	GgAGCtTTGaAT-TgAAGCATGG	2	2212182	-	4	1
RNA	GTAGCCTTGGATTTCAAGCANGG	GgAGCtTTGaATT-gAAGCATGG	2	2212182	-	4	1
RNA	GTAGCCTTGGATTTCAAGCANGG	GcAGCCTTaaA-TTCAAGaAGGG	2	6245020	+	4	1
RNA	GTAGCCTTGGATTTCAAGCANGG	GcAGCCTTaaAT-TCAAGaAGGG	2	6245020	+	4	1
RNA	GTAGCCTTGGATTTCAAGCANGG	GcAGCCTTaaATT-CAAGaAGGG	2	6245020	+	4	1
RNA	GTAGCCTTGGATTTCAAGCANGG	GTAGCCTTtGc-TTtAAGtAAGG	2	39536212	+	4	1
RNA	GTAGCCTTGGATTTCAAGCANGG	GTAGCCTTtGcT-TtAAGtAAGG	2	39536212	+	4	1
RNA	GTAGCCTTGGATTTCAAGCANGG	GTAGCCTTtGcTT-tAAGtAAGG	2	39536212	+	4	1
RNA	GTAGCCTTGGATTTCAAGCANGG	GTAGaCTTGGA-TTCAgaCtCGG	7	33523384	+	4	1
RNA	GTAGCCTTGGATTTCAAGCANGG	GTAGaCTTGGAT-TCAgaCtCGG	7	33523384	+	4	1
RNA	GTAGCCTTGGATTTCAAGCANGG	GTAGaCTTGGATT-CAgaCtCGG	7	33523384	+	4	1
RNA	GTAGCCTTGGATTTCAAGCANGG	GTAGCCTTtGA-cTCcAcCAAGG	7	41295557	+	4	1
RNA	GTAGCCTTGGATTTCAAGCANGG	GTAGCCTTtGAc-TCcAcCAAGG	7	41295557	+	4	1
RNA	GTAGCCTTGGATTTCAAGCANGG	GTAGCCTTtGAcT-CcAcCAAGG	7	41295557	+	4	1
RNA	GTAGCCTTGGATTTCAAGCANGG	GTAGtCTTtGc-TTtAAGCAAGG	1	1551432	+	4	1
RNA	GTAGCCTTGGATTTCAAGCANGG	GTAGtCTTtGcT-TtAAGCAAGG	1	1551432	+	4	1
RNA	GTAGCCTTGGATTTCAAGCANGG	GTAGtCTTtGcTT-tAAGCAAGG	1	1551432	+	4	1
RNA	GTAGCCTTGGATTTCAAGCANGG	GTActCTTGGA-TTCgAGgAAGG	1	21335178	+	4	1
RNA	GTAGCCTTGGATTTCAAGCANGG	GTActCTTGGAT-TCgAGgAAGG	1	21335178	+	4	1
RNA	GTAGCCTTGGATTTCAAGCANGG	GTActCTTGGATT-CgAGgAAGG	1	21335178	+	4	1
RNA	GTAGCCTTGGATTTCAAGCANGG	tTAGCCaTGtA-TaCAAGCAAGG	1	46213075	-	4	1
RNA	GTAGCCTTGGATTTCAAGCANGG	tTAGCCaTGtAT-aCAAGCAAGG	1	46213075	-	4	1
RNA	GTAGCCTTGGATTTCAAGCANGG	tTAGCCaTGtATa-CAAGCAAGG	1	46213075	-	4	1
RNA	GTAGCCTTGGATTTCAAGCANGG	aTAtCCTTGGA-TTgAAaCAAGG	3	3913976	-	4	1
RNA	GTAGCCTTGGATTTCAAGCANGG	aTAtCCTTGGAT-TgAAaCAAGG	3	3913976	-	4	1
RNA	GTAGCCTTGGATTTCAAGCANGG	aTAtCCTTGGATT-gAAaCAAGG	3	3913976	-	4	1
RNA	GTAGCCTTGGATTTCAAGCANGG	acgGCCTTGGA-TTCAAGtAAGG	3	41356068	+	4	1
RNA	GTAGCCTTGGATTTCAAGCANGG	acgGCCTTGGAT-TCAAGtAAGG	3	41356068	+	4	1
RNA	GTAGCCTTGGATTTCAAGCANGG	acgGCCTTGGATT-CAAGtAAGG	3	41356068	+	4	1
RNA	GTAGCCTTGGATTTCAAGCANGG	GTcGCCTTGaATTT-cgGCAAGG	scaffold1039	2332	-	4	1
RNA	GTAGCCTTGGATTTCAAGCANGG	aTgGgCTgGGATTT-AAGCACGG	scaffold0194	28666	+	4	1
RNA	GTAGCCTTGGATTTCAAGCANGG	cTAaCCaTGGcTTT-AAGCAGGG	scaffold0049	16169	+	4	1
RNA	GTAGCCTTGGATTTCAAGCANGG	cTAaCCaTGGcTTT-AAGCAGGG	scaffold0021	164443	+	4	1
RNA	GTAGCCTTGGATTTCAAGCANGG	cTAaCCaTGGcTTT-AAGCAGGG	6	11374972	+	4	1
RNA	GTAGCCTTGGATTTCAAGCANGG	cTAaCCaTGGcTTT-AAGCAGGG	6	27749804	-	4	1
RNA	GTAGCCTTGGATTTCAAGCANGG	GcAGCtTTGGAaTT-AAGaATGG	6	32001765	+	4	1
RNA	GTAGCCTTGGATTTCAAGCANGG	GTtGgCTTGaATTc-AAGCAAGG	5	2323605	-	4	1
RNA	GTAGCCTTGGATTTCAAGCANGG	tcAaCaTTGGATTT-AAGCATGG	5	6778512	-	4	1
RNA	GTAGCCTTGGATTTCAAGCANGG	GTActaTTGGATTT-AAaCATGG	5	7996102	-	4	1
RNA	GTAGCCTTGGATTTCAAGCANGG	GTAtCCTTGGAgTT-AAttAGGG	5	13752012	+	4	1
RNA	GTAGCCTTGGATTTCAAGCANGG	cTAaCCaTGGcTTT-AAGCAGGG	5	15329556	-	4	1
RNA	GTAGCCTTGGATTTCAAGCANGG	tcAaCaTTGGATTT-AAGCATGG	5	17488543	+	4	1
RNA	GTAGCCTTGGATTTCAAGCANGG	cTAaCCaTGGcTTT-AAGCAGGG	5	18709180	+	4	1
RNA	GTAGCCTTGGATTTCAAGCANGG	GTAGaCTTGGtgTT-AAGaAAGG	5	35617307	-	4	1
RNA	GTAGCCTTGGATTTCAAGCANGG	GgAGCgTTGGATTg-AAcCAGGG	5	37742332	+	4	1
RNA	GTAGCCTTGGATTTCAAGCANGG	GgAGCgTTGGATTg-AAcCAGGG	5	37776414	+	4	1
RNA	GTAGCCTTGGATTTCAAGCANGG	GaAGaCTTGaATTg-AAGCAAGG	5	41569858	-	4	1
RNA	GTAGCCTTGGATTTCAAGCANGG	aTAGCaTTGGATTT-AAcCtAGG	8	10985022	+	4	1
RNA	GTAGCCTTGGATTTCAAGCANGG	GTgaCCTTcGATTT-tAGCAAGG	8	14939778	-	4	1
RNA	GTAGCCTTGGATTTCAAGCANGG	GTAGCCTTaGcTTa-AtGCATGG	8	28194863	+	4	1
RNA	GTAGCCTTGGATTTCAAGCANGG	GTgGCCTTGGAgTT-AActAAGG	8	30297399	-	4	1
RNA	GTAGCCTTGGATTTCAAGCANGG	GgAGCCTTtGcTTT-AAaCATGG	8	30880895	-	4	1
RNA	GTAGCCTTGGATTTCAAGCANGG	GaAGCCTTGGATaa-AAGtAAGG	8	44450030	+	4	1
RNA	GTAGCCTTGGATTTCAAGCANGG	cTAaCCaTGGcTTT-AAGCAGGG	8	45498004	-	4	1
RNA	GTAGCCTTGGATTTCAAGCANGG	GgAGCtTTGaATTg-AAGCATGG	2	2212182	-	4	1
RNA	GTAGCCTTGGATTTCAAGCANGG	aTAcCCTcGGATTT-AAtCAAGG	2	2656454	-	4	1
RNA	GTAGCCTTGGATTTCAAGCANGG	GTActaTTGGATTT-AAaCATGG	7	8957187	-	4	1
RNA	GTAGCCTTGGATTTCAAGCANGG	aaAGCCTTGGtTTT-AAtCAAGG	7	37215480	-	4	1
RNA	GTAGCCTTGGATTTCAAGCANGG	tTAGCtTaGGATTT-AtGCAAGG	1	29481	+	4	1
RNA	GTAGCCTTGGATTTCAAGCANGG	GcAGCtTTGGATTT-AActAAGG	1	7886267	+	4	1
RNA	GTAGCCTTGGATTTCAAGCANGG	aTAGCCTTGGAaTT-tgGCAAGG	1	14619275	-	4	1
RNA	GTAGCCTTGGATTTCAAGCANGG	aTAGgCTgGGATTT-AtGCACGG	1	18057800	+	4	1
RNA	GTAGCCTTGGATTTCAAGCANGG	GTAattTTGGATTT-AAGCtCGG	1	37503130	+	4	1
RNA	GTAGCCTTGGATTTCAAGCANGG	GTgGCaTTGaATTT-AAGgATGG	3	3728143	-	4	1
RNA	GTAGCCTTGGATTTCAAGCANGG	aTAtCCTTGGATTg-AAaCAAGG	3	3913976	-	4	1
RNA	GTAGCCTTGGATTTCAAGCANGG	cTAaCCaTGGcTTT-AAGCAGGG	3	5151141	-	4	1
RNA	GTAGCCTTGGATTTCAAGCANGG	taAcCCTTGaATTT-AAGCAAGG	3	11150254	-	4	1
RNA	GTAGCCTTGGATTTCAAGCANGG	aTgGgCTTGGATTT-AtGCACGG	3	16276699	-	4	1
RNA	GTAGCCTTGGATTTCAAGCANGG	caAcCaTTGGATTT-AAGCAAGG	3	20659542	+	4	1
RNA	GTAGCCTTGGATTTCAAGCANGG	GgAGCtTTGGAcTT-cAGCATGG	3	25150260	-	4	1
RNA	GTAGCCTTGGATTTCAAGCANGG	GTAGtCTTtGtTTT-AAGCtTGG	3	30729567	-	4	1
RNA	GTAGCCTTGGATTTCAAGCANGG	tcAaCaTTGGATTT-AAGCATGG	3	43095961	-	4	1
RNA	GTAGCCTTGGATTTCAAGCANGG	GcAGCCTTGGgTTT-ttGCATGG	4	5128680	+	4	1
RNA	GTAGCCTTGGATTTCAAGCANGG	cT-tatTTGGATTTCAAGCATGG	4	19151108	-	4	1
RNA	GTAGCCTTGGATTTCAAGCANGG	GT-GCaTTtGATaTCAAGtATGG	4	29220764	-	4	1
RNA	GTAGCCTTGGATTTCAAGCANGG	tT-ttCTTGGATTTCAgGCATGG	4	31299485	+	4	1
RNA	GTAGCCTTGGATTTCAAGCANGG	GT-tCCTTGaATTaCAAGgAAGG	4	33647076	-	4	1
RNA	GTAGCCTTGGATTTCAAGCANGG	GT-GCCTTGtgTTTCAAGttAGG	4	39044089	+	4	1
RNA	GTAGCCTTGGATTTCAAGCANGG	GT-agCTTGGATTTtAAGaAGGG	4	46919485	-	4	1
RNA	GTAGCCTTGGATTTCAAGCANGG	aT-cCCTTGGATTTagAGCATGG	4	50397319	+	4	1
RNA	GTAGCCTTGGATTTCAAGCANGG	tT-GCCTTtGATTTCAtGaAAGG	4	50250544	-	4	1
RNA	GTAGCCTTGGATTTCAAGCANGG	a-AGgCTTGaATTTgAAGCAAGG	4	9495154	-	4	1
RNA	GTAGCCTTGGATTTCAAGCANGG	a-tGCCTTGtcTTTCAAGCAAGG	4	16290867	+	4	1
RNA	GTAGCCTTGGATTTCAAGCANGG	G-AaCaTTGGAcTTCAAaCAAGG	4	20910357	+	4	1
RNA	GTAGCCTTGGATTTCAAGCANGG	G-AGgCTTtGATTTgAAGaATGG	4	36260775	-	4	1
RNA	GTAGCCTTGGATTTCAAGCANGG	GTAGCaTTGG-aTTCAtcCATGG	4	21194385	-	4	1
RNA	GTAGCCTTGGATTTCAAGCANGG	GTAGtCTTGG-gaTCAAGgAAGG	4	26639410	-	4	1
RNA	GTAGCCTTGGATTTCAAGCANGG	GTAGCaTTGG-aTTCAtcCATGG	4	27250158	-	4	1
RNA	GTAGCCTTGGATTTCAAGCANGG	GTAGCCTTct-TTgCAAGaAAGG	4	42768916	-	4	1
RNA	GTAGCCTTGGATTTCAAGCANGG	GaAGCC-cGGATTgaAAGCAAGG	4	26838728	+	4	1
RNA	GTAGCCTTGGATTTCAAGCANGG	GaAGCCc-GGATTgaAAGCAAGG	4	26838728	+	4	1
RNA	GTAGCCTTGGATTTCAAGCANGG	GTAGCC-aGGATTTtAAGacAGG	4	29580930	+	4	1
RNA	GTAGCCTTGGATTTCAAGCANGG	GTAGCCa-GGATTTtAAGacAGG	4	29580930	+	4	1
RNA	GTAGCCTTGGATTTCAAGCANGG	GcAaCCTT-GgTTTCAAGaAAGG	4	9432591	-	4	1
RNA	GTAGCCTTGGATTTCAAGCANGG	GcAaCCTTG-gTTTCAAGaAAGG	4	9432591	-	4	1
RNA	GTAGCCTTGGATTTCAAGCANGG	cTAGgaTT-GATTTCAtGCACGG	4	24243636	+	4	1
RNA	GTAGCCTTGGATTTCAAGCANGG	cTAGgaTTG-ATTTCAtGCACGG	4	24243636	+	4	1
RNA	GTAGCCTTGGATTTCAAGCANGG	GTAGtCaT-GATTTCAAtCtCGG	4	25486905	-	4	1
RNA	GTAGCCTTGGATTTCAAGCANGG	GTAGtCaTG-ATTTCAAtCtCGG	4	25486905	-	4	1
RNA	GTAGCCTTGGATTTCAAGCANGG	GTAaCaTT-GATgTCAAGCtTGG	4	26222490	-	4	1
RNA	GTAGCCTTGGATTTCAAGCANGG	GTAaCaTTG-ATgTCAAGCtTGG	4	26222490	-	4	1
RNA	GTAGCCTTGGATTTCAAGCANGG	GTgtCCTT-GATTTaAAGtATGG	4	26945095	-	4	1
RNA	GTAGCCTTGGATTTCAAGCANGG	GTgtCCTTG-ATTTaAAGtATGG	4	26945095	-	4	1
RNA	GTAGCCTTGGATTTCAAGCANGG	GTAaCaTT-GATgTCAAGCtTGG	4	33542054	-	4	1
RNA	GTAGCCTTGGATTTCAAGCANGG	GTAaCaTTG-ATgTCAAGCtTGG	4	33542054	-	4	1
RNA	GTAGCCTTGGATTTCAAGCANGG	GTAGCCTT-ctTTgCAAGaAAGG	4	42768916	-	4	1
RNA	GTAGCCTTGGATTTCAAGCANGG	GTAGCCTTc-tTTgCAAGaAAGG	4	42768916	-	4	1
RNA	GTAGCCTTGGATTTCAAGCANGG	GTtGgCTT-aATTTCAgGCATGG	4	45669946	+	4	1
RNA	GTAGCCTTGGATTTCAAGCANGG	GTtGgCTTa-ATTTCAgGCATGG	4	45669946	+	4	1
RNA	GTAGCCTTGGATTTCAAGCANGG	GTAGCtTg-GATTTtAAGaAGGG	4	46919485	-	4	1
RNA	GTAGCCTTGGATTTCAAGCANGG	GTAGCtTgG-ATTTtAAGaAGGG	4	46919485	-	4	1
RNA	GTAGCCTTGGATTTCAAGCANGG	GTtGCaTT-GATTTCAAttAAGG	4	46726707	-	4	1
RNA	GTAGCCTTGGATTTCAAGCANGG	GTtGCaTTG-ATTTCAAttAAGG	4	46726707	-	4	1
RNA	GTAGCCTTGGATTTCAAGCANGG	GTAGtgTTGcAaTTCAA-CAAGG	4	18918840	+	4	1
RNA	GTAGCCTTGGATTTCAAGCANGG	GaAGCCaaGGAaTTCAA-CATGG	4	20744116	-	4	1
RNA	GTAGCCTTGGATTTCAAGCANGG	GTtcaCTTcGATTTCAA-CAAGG	4	32800340	+	4	1
RNA	GTAGCCTTGGATTTCAAGCANGG	GTAGgCTTcGATaTCAA-aAGGG	4	33605774	+	4	1
RNA	GTAGCCTTGGATTTCAAGCANGG	GTAGtCaTGGATTTaAA-CtTGG	4	40211638	+	4	1
RNA	GTAGCCTTGGATTTCAAGCANGG	tTAGCCTTtGATTTCAc-tAAGG	4	41964303	-	4	1
RNA	GTAGCCTTGGATTTCAAGCANGG	tTAGCCTTtGATTTCAc-tAAGG	4	50262955	+	4	1
RNA	GTAGCCTTGGATTTCAAGCANGG	tTAGCCTTtGATTTCAc-tAAGG	4	50674103	+	4	1
RNA	GTAGCCTTGGATTTCAAGCANGG	tTAGCCTTtGATTTCAc-tAAGG	4	55085622	+	4	1
RNA	GTAGCCTTGGATTTCAAGCANGG	tTAGCCTTtGATTTCAc-tAAGG	4	54882908	-	4	1
RNA	GTAGCCTTGGATTTCAAGCANGG	aTg-CCTTGtcTTTCAAGCAAGG	4	16290867	+	4	1
RNA	GTAGCCTTGGATTTCAAGCANGG	tTA-agTcGGATTTCAAGCATGG	4	19149430	+	4	1
RNA	GTAGCCTTGGATTTCAAGCANGG	cTt-atTTGGATTTCAAGCATGG	4	19151108	-	4	1
RNA	GTAGCCTTGGATTTCAAGCANGG	GaA-CaTTGGAcTTCAAaCAAGG	4	20910357	+	4	1
RNA	GTAGCCTTGGATTTCAAGCANGG	tTt-tCTTGGATTTCAgGCATGG	4	31299485	+	4	1
RNA	GTAGCCTTGGATTTCAAGCANGG	GTt-CCTTGaATTaCAAGgAAGG	4	33647076	-	4	1
RNA	GTAGCCTTGGATTTCAAGCANGG	aTc-CCTTGGATTTagAGCATGG	4	50397319	+	4	1
X	GTAGCCTTGGATTTCAAGCANGG	GTtGCCTTtGATTTCAtGaAAGG	4	50250544	-	4	0
RNA	GTAGCCTTGGATTTCAAGCANGG	tTAa-gTcGGATTTCAAGCATGG	4	19149430	+	4	1
RNA	GTAGCCTTGGATTTCAAGCANGG	tTAag-TcGGATTTCAAGCATGG	4	19149430	+	4	1
RNA	GTAGCCTTGGATTTCAAGCANGG	cTta-tTTGGATTTCAAGCATGG	4	19151108	-	4	1
RNA	GTAGCCTTGGATTTCAAGCANGG	cTtat-TTGGATTTCAAGCATGG	4	19151108	-	4	1
RNA	GTAGCCTTGGATTTCAAGCANGG	tTtt-CTTGGATTTCAgGCATGG	4	31299485	+	4	1
RNA	GTAGCCTTGGATTTCAAGCANGG	tTttC-TTGGATTTCAgGCATGG	4	31299485	+	4	1
RNA	GTAGCCTTGGATTTCAAGCANGG	GTAG-tTTGGATgTCAAtaAAGG	4	38374147	+	4	1
RNA	GTAGCCTTGGATTTCAAGCANGG	GTAGt-TTGGATgTCAAtaAAGG	4	38374147	+	4	1
RNA	GTAGCCTTGGATTTCAAGCANGG	tgAG-CTTGGATTTCAAttATGG	4	52053461	+	4	1
RNA	GTAGCCTTGGATTTCAAGCANGG	tgAGC-TTGGATTTCAAttATGG	4	52053461	+	4	1
RNA	GTAGCCTTGGATTTCAAGCANGG	GaAGCaTTGGATTTaAAG-tGGG	4	14292894	-	4	1
RNA	GTAGCCTTGGATTTCAAGCANGG	GaAGCaTTGGATTTaAAG-tGGG	4	14308943	-	4	1
RNA	GTAGCCTTGGATTTCAAGCANGG	GTccCCgTGaATTTCAAG-AAGG	4	16365639	+	4	1
RNA	GTAGCCTTGGATTTCAAGCANGG	GTAGgCTTcGATaTCAAa-AGGG	4	33605774	+	4	1
RNA	GTAGCCTTGGATTTCAAGCANGG	GTccCCgTGaATTTCAAG-AAGG	4	39531398	+	4	1
RNA	GTAGCCTTGGATTTCAAGCANGG	tTAGCCTTtGATTTCAct-AAGG	4	41964303	-	4	1
RNA	GTAGCCTTGGATTTCAAGCANGG	GTAGCtTTGaATTatAAG-ATGG	4	43768567	-	4	1
RNA	GTAGCCTTGGATTTCAAGCANGG	tTAGCCTTtGATTTCAct-AAGG	4	50262955	+	4	1
RNA	GTAGCCTTGGATTTCAAGCANGG	tTtGggTTGGATTTCAAG-AAGG	4	50371475	+	4	1
RNA	GTAGCCTTGGATTTCAAGCANGG	tTAGCCTTtGATTTCAct-AAGG	4	50674103	+	4	1
RNA	GTAGCCTTGGATTTCAAGCANGG	GTAaCtTTGGtaTTCAAG-AGGG	4	54011162	+	4	1
RNA	GTAGCCTTGGATTTCAAGCANGG	tTAGCCTTtGATTTCAct-AAGG	4	55085622	+	4	1
RNA	GTAGCCTTGGATTTCAAGCANGG	tTAGCCTTtGATTTCAct-AAGG	4	54882908	-	4	1
RNA	GTAGCCTTGGATTTCAAGCANGG	cctGCCTTGGATTTC-AGCgGGG	4	28218389	-	4	1
RNA	GTAGCCTTGGATTTCAAGCANGG	cctGCCTTGGATTTCA-GCgGGG	4	28218389	-	4	1
RNA	GTAGCCTTGGATTTCAAGCANGG	tTAGCCTTtGATTTC-ActAAGG	4	41964303	-	4	1
RNA	GTAGCCTTGGATTTCAAGCANGG	tTAGCCTTtGATTTCA-ctAAGG	4	41964303	-	4	1
RNA	GTAGCCTTGGATTTCAAGCANGG	tTAGCCTTtGATTTC-ActAAGG	4	50262955	+	4	1
RNA	GTAGCCTTGGATTTCAAGCANGG	tTAGCCTTtGATTTCA-ctAAGG	4	50262955	+	4	1
RNA	GTAGCCTTGGATTTCAAGCANGG	tTAGCCTTtGATTTC-ActAAGG	4	50674103	+	4	1
RNA	GTAGCCTTGGATTTCAAGCANGG	tTAGCCTTtGATTTCA-ctAAGG	4	50674103	+	4	1
RNA	GTAGCCTTGGATTTCAAGCANGG	tTAGCCTTtGATTTC-ActAAGG	4	55085622	+	4	1
RNA	GTAGCCTTGGATTTCAAGCANGG	tTAGCCTTtGATTTCA-ctAAGG	4	55085622	+	4	1
RNA	GTAGCCTTGGATTTCAAGCANGG	tTAGCCTTtGATTTC-ActAAGG	4	54882908	-	4	1
RNA	GTAGCCTTGGATTTCAAGCANGG	tTAGCCTTtGATTTCA-ctAAGG	4	54882908	-	4	1
RNA	GTAGCCTTGGATTTCAAGCANGG	GcAaCCTTGGt-TTCAAGaAAGG	4	9432591	-	4	1
RNA	GTAGCCTTGGATTTCAAGCANGG	GcAaCCTTGGtT-TCAAGaAAGG	4	9432591	-	4	1
RNA	GTAGCCTTGGATTTCAAGCANGG	GcAaCCTTGGtTT-CAAGaAAGG	4	9432591	-	4	1
RNA	GTAGCCTTGGATTTCAAGCANGG	GTAGtCTTGGg-aTCAAGgAAGG	4	26639410	-	4	1
RNA	GTAGCCTTGGATTTCAAGCANGG	GTAGtCTTGGga-TCAAGgAAGG	4	26639410	-	4	1
RNA	GTAGCCTTGGATTTCAAGCANGG	GTAGtCTTGGgaT-CAAGgAAGG	4	26639410	-	4	1
RNA	GTAGCCTTGGATTTCAAGCANGG	GTAGCaTTGGA-cTCAtcCATGG	4	27261987	-	4	1
RNA	GTAGCCTTGGATTTCAAGCANGG	GTAGCaTTGGAc-TCAtcCATGG	4	27261987	-	4	1
RNA	GTAGCCTTGGATTTCAAGCANGG	GTAGCaTTGGAcT-CAtcCATGG	4	27261987	-	4	1
RNA	GTAGCCTTGGATTTCAAGCANGG	GTAGCaTTGtA-gTCAAtCACGG	4	28830268	+	4	1
RNA	GTAGCCTTGGATTTCAAGCANGG	GTAGCaTTGtAg-TCAAtCACGG	4	28830268	+	4	1
RNA	GTAGCCTTGGATTTCAAGCANGG	GTAGCaTTGtAgT-CAAtCACGG	4	28830268	+	4	1
RNA	GTAGCCTTGGATTTCAAGCANGG	GTAGCtTTGtA-cTaAAGCAAGG	4	30414429	-	4	1
RNA	GTAGCCTTGGATTTCAAGCANGG	GTAGCtTTGtAc-TaAAGCAAGG	4	30414429	-	4	1
RNA	GTAGCCTTGGATTTCAAGCANGG	GTAGCtTTGtAcT-aAAGCAAGG	4	30414429	-	4	1
RNA	GTAGCCTTGGATTTCAAGCANGG	cTAaCCaTGGcTTT-AAGCAGGG	4	14933492	+	4	1
RNA	GTAGCCTTGGATTTCAAGCANGG	GaAGCaTTtGATTT-AtGCAAGG	4	17124936	-	4	1
RNA	GTAGCCTTGGATTTCAAGCANGG	GTAGCaTTGGATTc-AtcCATGG	4	21194385	-	4	1
RNA	GTAGCCTTGGATTTCAAGCANGG	GTAGCaTTGGATTc-AtcCATGG	4	27250158	-	4	1
RNA	GTAGCCTTGGATTTCAAGCANGG	GTAGCtTTGtAcTa-AAGCAAGG	4	30414429	-	4	1
RNA	GTAGCCTTGGATTTCAAGCANGG	GaAGCtTgGGATTT-AAtCAAGG	4	37544420	-	4	1
RNA	GTAGCCTTGGATTTCAAGCANGG	GTAGtCaTGGATTT-AAaCtTGG	4	40211638	+	4	1
RNA	GTAGCCTTGGATTTCAAGCANGG	aTAGaCaTGGATTT-AAtCAAGG	4	42087542	+	4	1
RNA	GTAGCCTTGGATTTCAAGCANGG	tTAcCaTTGGATTT-AAtCAAGG	4	54818336	+	4	1
DNA	GTAGCCTTGGATTTCAAGC-ANGG	GTttCCTTGcATTTCAAtCAAAGG	5	6305658	+	4	1
DNA	GTAGCCTTGGATTTCAAGC-ANGG	GTccCCTTGGAcTTgAAGCAAGGG	5	6709177	-	4	1
DNA	GTAGCCTTGGATTTCAAGC-ANGG	GaAGCCaTGaATTTaAAGCTAGGG	5	13760056	-	4	1
DNA	GTAGCCTTGGATTTCAAGC-ANGG	tTAcCCTTtGATTTCAtGCTATGG	8	3424879	-	4	1
DNA	GTAGCCTTGGATTTCAAGC-ANGG	GTAttCTTcGATTTCAAGaCACGG	8	29089836	-	4	1
DNA	GTAGCCTTGGATTTCAAGC-ANGG	tTAtCCTTGGATTgCAAGaTAAGG	3	30519832	+	4	1
DNA	GTAGCCTTGGATTTCAAGC-ANGG	GcAGCCTTaGATTaCAAGtAAGGG	3	43745050	-	4	1
DNA	GTAGCCTTGGATTTCAAGC-ANGG	taAcCCTTGGATTTaAAGCAACGG	4	50183932	-	4	1
DNA	GTAGCCTTGGATTTCAAG-CANGG	GcAaCCTTGGAgTTCAgGGCACGG	scaffold0886	2535	+	4	1
DNA	GTAGCCTTGGATTTCAAG-CANGG	aTAttCTTGGATTTCAtGTCAAGG	5	2613415	-	4	1
DNA	GTAGCCTTGGATTTCAAG-CANGG	GTAGtCTTGcAaTTCAAGCtATGG	8	13775825	+	4	1
DNA	GTAGCCTTGGATTTCAAG-CANGG	GTAtCgTTGGAaTTCAtGTCAGGG	7	46160011	-	4	1
DNA	GTAGCCTTGGATTTCAAG-CANGG	agAGtgTTGGATTTCAAGGCATGG	1	50070884	+	4	1
DNA	GTAGCCTTGGATTTCAAG-CANGG	GTgcatTTGGATTTCAAGGCAAGG	1	50943193	-	4	1
DNA	GTAGCCTTGGATTTCAAG-CANGG	tTAtCCTTGGATTgCAAGAtAAGG	3	30519832	+	4	1
DNA	GTAGCCTTGGATTTCAAG-CANGG	GcAGCCTTaGATTaCAAGTaAGGG	3	43745050	-	4	1
DNA	GTAGCCTTGGATTTCAAG-CANGG	GTgcatTTGGATTTCAAGGCAAGG	3	51032718	+	4	1
DNA	GTAGCCTTGGATTTCAAG-CANGG	GTAGagTTGGtTTTaAAGACATGG	4	7239451	+	4	1
DNA	GTAGCCTTGGATTTCAAG-CANGG	tTAGCCTTcaATTTCAAGCaAAGG	4	39054567	+	4	1
DNA	GTAGCCTTGGATTTCAA-GCANGG	GcAaCCTTGGAgTTCAgGGCACGG	scaffold0886	2535	+	4	1
DNA	GTAGCCTTGGATTTCAA-GCANGG	GTAGtCTTGttTTaCAATGCATGG	scaffold0062	58527	+	4	1
DNA	GTAGCCTTGGATTTCAA-GCANGG	GTAGtCTTGttTTTtAATGCATGG	scaffold0062	70629	+	4	1
DNA	GTAGCCTTGGATTTCAA-GCANGG	GTAGtCTTGttTTaCAATGCATGG	8	18689338	+	4	1
DNA	GTAGCCTTGGATTTCAA-GCANGG	GTAttCTTcGATTTCAAGaCACGG	8	29089836	-	4	1
DNA	GTAGCCTTGGATTTCAA-GCANGG	GTAGtCTTGttTTaCAATGCATGG	2	15709615	+	4	1
DNA	GTAGCCTTGGATTTCAA-GCANGG	GTAGtCTTGttTTTtAATGCATGG	2	15722072	+	4	1
DNA	GTAGCCTTGGATTTCAA-GCANGG	GTAGCCTTGtgTcTCcAAGCATGG	2	27489908	-	4	1
DNA	GTAGCCTTGGATTTCAA-GCANGG	taAGCgTTGGATaTCAAAGCAAGG	1	21394836	+	4	1
DNA	GTAGCCTTGGATTTCAA-GCANGG	agAGtgTTGGATTTCAAGGCATGG	1	50070884	+	4	1
DNA	GTAGCCTTGGATTTCAA-GCANGG	GTgcatTTGGATTTCAAGGCAAGG	1	50943193	-	4	1
DNA	GTAGCCTTGGATTTCAA-GCANGG	GTgcatTTGGATTTCAAGGCAAGG	3	51032718	+	4	1
DNA	GTAGCCTTGGATTTCAA-GCANGG	GTAttCaTGGATTTCtATGCAGGG	4	51441452	+	4	1
DNA	GTAGCCTTGGATTTCA-AGCANGG	GcAaCCTTGGAgTTCAGgGCACGG	scaffold0886	2535	+	4	1
DNA	GTAGCCTTGGATTTCA-AGCANGG	GgAcCaTTGGATTgCATAGCATGG	scaffold0010	158340	+	4	1
DNA	GTAGCCTTGGATTTCA-AGCANGG	GTtGCCTTtGATTTaATAGaAAGG	6	21979446	-	4	1
DNA	GTAGCCTTGGATTTCA-AGCANGG	tTAaCCTTGGAcaTCACAGCAAGG	5	29586835	+	4	1
DNA	GTAGCCTTGGATTTCA-AGCANGG	GTgGCCTTaGATTTCgTAaCATGG	2	19932498	+	4	1
DNA	GTAGCCTTGGATTTCA-AGCANGG	GTAGCCTTGtgTcTCcAAGCATGG	2	27489908	-	4	1
DNA	GTAGCCTTGGATTTCA-AGCANGG	GaAaCCTTGGcTTTCtCAGCAAGG	2	44226386	-	4	1
DNA	GTAGCCTTGGATTTCA-AGCANGG	GTtGtCTTGGATTTgAGAcCAAGG	7	34339011	+	4	1
DNA	GTAGCCTTGGATTTCA-AGCANGG	GaAaCCTTGGcTTTCtCAGCAAGG	7	39551744	-	4	1
DNA	GTAGCCTTGGATTTCA-AGCANGG	GTgGCCTTGGcTTTCgCAaCATGG	1	20128256	+	4	1
DNA	GTAGCCTTGGATTTCA-AGCANGG	taAGCgTTGGATaTCAAAGCAAGG	1	21394836	+	4	1
DNA	GTAGCCTTGGATTTCA-AGCANGG	GTAtCaTTGGATTTCATAGatTGG	3	9587855	+	4	1
DNA	GTAGCCTTGGATTTCA-AGCANGG	GaAaCCTTGGcTTTCtCAGCAAGG	4	2883254	+	4	1
DNA	GTAGCCTTGGATTTCA-AGCANGG	GTgGCCTTGGcTTTCgTAaCATGG	4	54422844	-	4	1
DNA	GTAGCCTTGGATTTC-AAGCANGG	GTgGCCTTaGATTTCGtAaCATGG	2	19932498	+	4	1
DNA	GTAGCCTTGGATTTC-AAGCANGG	GaAaCCTTGGcTTTCTcAGCAAGG	2	44226386	-	4	1
DNA	GTAGCCTTGGATTTC-AAGCANGG	GaAaCCTTGGcTTTCTcAGCAAGG	7	39551744	-	4	1
DNA	GTAGCCTTGGATTTC-AAGCANGG	GTgGCCTTGGcTTTCGcAaCATGG	1	20128256	+	4	1
DNA	GTAGCCTTGGATTTC-AAGCANGG	taAGCgTTGGATaTCAAAGCAAGG	1	21394836	+	4	1
DNA	GTAGCCTTGGATTTC-AAGCANGG	GTtGtCTTGGtTTTCGAAaCATGG	1	30839610	+	4	1
DNA	GTAGCCTTGGATTTC-AAGCANGG	GTAGCgTTGcATaTaTAAGCATGG	1	36938807	-	4	1
DNA	GTAGCCTTGGATTTC-AAGCANGG	GaAaCCTTGGcTTTCTcAGCAAGG	4	2883254	+	4	1
DNA	GTAGCCTTGGATTTC-AAGCANGG	GTAttCaTGGATTTCTAtGCAGGG	4	51441452	+	4	1
DNA	GTAGCCTTGGATTTC-AAGCANGG	GTgGCCTTGGcTTTCGtAaCATGG	4	54422844	-	4	1
DNA	GTAGCCTTGGATTT-CAAGCANGG	GTgGgCTTcGATTgTCAAGCAAGG	2	5400409	+	4	1
DNA	GTAGCCTTGGATTT-CAAGCANGG	GTAGCgTTGcATaTAtAAGCATGG	1	36938807	-	4	1
DNA	GTAGCCTTGGATTT-CAAGCANGG	GTAGtCacGtATTTGCAAGCAGGG	4	26499542	-	4	1
DNA	GTAGCCTTGGATT-TCAAGCANGG	GTAGgCgTGGATgCTgAAGCAGGG	scaffold0118	25723	-	4	1
DNA	GTAGCCTTGGATT-TCAAGCANGG	cTAGCtTTGGATTCTCAAtCtTGG	8	8170073	-	4	1
DNA	GTAGCCTTGGATT-TCAAGCANGG	GTAGCCTTGtgTcTcCAAGCATGG	2	27489908	-	4	1
DNA	GTAGCCTTGGATT-TCAAGCANGG	GTtGCtTTtGAgTCTCAAGCAAGG	2	34672815	+	4	1
DNA	GTAGCCTTGGATT-TCAAGCANGG	GTAGCtTTcGAcTATgAAGCACGG	1	6574083	-	4	1
DNA	GTAGCCTTGGATT-TCAAGCANGG	GcAGCCTTGGAaTCTgAAGCcAGG	1	22936716	+	4	1
DNA	GTAGCCTTGGATT-TCAAGCANGG	aTAGCCTTGaAaTATCAAGgAGGG	1	39042821	-	4	1
DNA	GTAGCCTTGGAT-TTCAAGCANGG	GTAGgCgTGGATGcTgAAGCAGGG	scaffold0118	25723	-	4	1
DNA	GTAGCCTTGGAT-TTCAAGCANGG	GTAaCaTTctATCTTCAAGCATGG	8	480802	+	4	1
DNA	GTAGCCTTGGAT-TTCAAGCANGG	GTgGgCTTcGATTgTCAAGCAAGG	2	5400409	+	4	1
DNA	GTAGCCTTGGAT-TTCAAGCANGG	GTAGCgTTGcATATatAAGCATGG	1	36938807	-	4	1
DNA	GTAGCCTTGGA-TTTCAAGCANGG	GTAGatTTGGAATTTtAAGtATGG	5	7266892	+	4	1
DNA	GTAGCCTTGGA-TTTCAAGCANGG	GTAaCCaTGGAATTTgAAGaAGGG	8	28410532	-	4	1
DNA	GTAGCCTTGGA-TTTCAAGCANGG	GTAGCCcTGGAGTTTgAAaaAGGG	8	37709605	-	4	1
DNA	GTAGCCTTGGA-TTTCAAGCANGG	GTgGgCTTcGATTgTCAAGCAAGG	2	5400409	+	4	1
DNA	GTAGCCTTGGA-TTTCAAGCANGG	GTAGCCTTGtgTcTcCAAGCATGG	2	27489908	-	4	1
DNA	GTAGCCTTGGA-TTTCAAGCANGG	GTtGCtTTtGAGTcTCAAGCAAGG	2	34672815	+	4	1
DNA	GTAGCCTTGGA-TTTCAAGCANGG	GTAGaCTTGGAATTTgAgGtATGG	1	6635591	+	4	1
DNA	GTAGCCTTGGA-TTTCAAGCANGG	GTAGCtTTcGACTaTgAAGCACGG	1	6574083	-	4	1
DNA	GTAGCCTTGGA-TTTCAAGCANGG	GcAGCCTTGGAATcTgAAGCcAGG	1	22936716	+	4	1
DNA	GTAGCCTTGGA-TTTCAAGCANGG	aTAGCCTTGaAATaTCAAGgAGGG	1	39042821	-	4	1
DNA	GTAGCCTTGGA-TTTCAAGCANGG	GaAGCCTTcGAATTTCAgGgATGG	3	6592353	+	4	1
DNA	GTAGCCTTGGA-TTTCAAGCANGG	GTAGCtTTaGAGTTTgAAaCATGG	4	36810539	-	4	1
DNA	GTAGCCTTGG-ATTTCAAGCANGG	GTAGaCcctGCATTTCAAGCATGG	6	12737177	+	4	1
DNA	GTAGCCTTGG-ATTTCAAGCANGG	GTAtCCacGGCATTTCcAGCATGG	6	12922162	+	4	1
DNA	GTAGCCTTGG-ATTTCAAGCANGG	GTAGatTTGGAATTTtAAGtATGG	5	7266892	+	4	1
DNA	GTAGCCTTGG-ATTTCAAGCANGG	GTAaCCaTGGAATTTgAAGaAGGG	8	28410532	-	4	1
DNA	GTAGCCTTGG-ATTTCAAGCANGG	aTAGCCTTaGGATTaCAAaCACGG	8	34069186	-	4	1
DNA	GTAGCCTTGG-ATTTCAAGCANGG	GgAtCCTTGGCAaTTCAtGCAAGG	2	17600035	+	4	1
DNA	GTAGCCTTGG-ATTTCAAGCANGG	GTAGCCTTGtGtcTcCAAGCATGG	2	27489908	-	4	1
DNA	GTAGCCTTGG-ATTTCAAGCANGG	GTAGaCTTGGAATTTgAgGtATGG	1	6635591	+	4	1
DNA	GTAGCCTTGG-ATTTCAAGCANGG	GcAGCCTTGGAATcTgAAGCcAGG	1	22936716	+	4	1
DNA	GTAGCCTTGG-ATTTCAAGCANGG	aTAGCCTTGaAATaTCAAGgAGGG	1	39042821	-	4	1
DNA	GTAGCCTTGG-ATTTCAAGCANGG	GaAGCCTTcGAATTTCAgGgATGG	3	6592353	+	4	1
DNA	GTAGCCTTGG-ATTTCAAGCANGG	GgAtCCTTGGCAaTTCAcGCAAGG	4	18154580	-	4	1
DNA	GTAGCCTTG-GATTTCAAGCANGG	GTAGCCaTtAGATTaaAAGCAAGG	scaffold0517	4713	-	4	1
DNA	GTAGCCTTG-GATTTCAAGCANGG	GTtcCCTTaAGtTTTCAAGCACGG	5	17383659	-	4	1
DNA	GTAGCCTTG-GATTTCAAGCANGG	aTAGCCTTaGGATTaCAAaCACGG	8	34069186	-	4	1
DNA	GTAGCCTTG-GATTTCAAGCANGG	GatGCCTTGAGATcTCAAGgATGG	2	24608412	+	4	1
DNA	GTAGCCTTG-GATTTCAAGCANGG	GTAGCCaTtAGATTaaAAGCAAGG	1	37403338	+	4	1
DNA	GTAGCCTTG-GATTTCAAGCANGG	aTAGCCTTGAaATaTCAAGgAGGG	1	39042821	-	4	1
DNA	GTAGCCTTG-GATTTCAAGCANGG	ccAGCtTTGTGATTTCAAGCtTGG	3	48857075	+	4	1
DNA	GTAGCCTT-GGATTTCAAGCANGG	GTAGCCaTTaGATTaaAAGCAAGG	scaffold0517	4713	-	4	1
DNA	GTAGCCTT-GGATTTCAAGCANGG	GTAGaCccTGcATTTCAAGCATGG	6	12737177	+	4	1
DNA	GTAGCCTT-GGATTTCAAGCANGG	GTtcCCTTAaGtTTTCAAGCACGG	5	17383659	-	4	1
DNA	GTAGCCTT-GGATTTCAAGCANGG	GTAGgCgTCGGAgTTCAAaCACGG	8	3449299	-	4	1
DNA	GTAGCCTT-GGATTTCAAGCANGG	GatGCaTTAGGATgTCAAGCAAGG	2	1811733	-	4	1
DNA	GTAGCCTT-GGATTTCAAGCANGG	GaAGCCTTTGGAaTTCcAGgAAGG	2	17853824	-	4	1
DNA	GTAGCCTT-GGATTTCAAGCANGG	GTAGCCTTGtGtcTcCAAGCATGG	2	27489908	-	4	1
DNA	GTAGCCTT-GGATTTCAAGCANGG	GTAGCCaTTaGATTaaAAGCAAGG	1	37403338	+	4	1
DNA	GTAGCCTT-GGATTTCAAGCANGG	tTAaCCTTTGGATTTgAAGgAGGG	1	37106449	-	4	1
DNA	GTAGCCTT-GGATTTCAAGCANGG	GaAGCCTTCGaATTTCAgGgATGG	3	6592353	+	4	1
DNA	GTAGCCT-TGGATTTCAAGCANGG	GTAGCCaTTaGATTaaAAGCAAGG	scaffold0517	4713	-	4	1
DNA	GTAGCCT-TGGATTTCAAGCANGG	tTAGaaaCTGGATTTCAAGCATGG	6	16994282	-	4	1
DNA	GTAGCCT-TGGATTTCAAGCANGG	GTAGCCTCTGcATTTtcAGgAAGG	8	28495521	+	4	1
DNA	GTAGCCT-TGGATTTCAAGCANGG	aTAGCCTTaGGATTaCAAaCACGG	8	34069186	-	4	1
DNA	GTAGCCT-TGGATTTCAAGCANGG	GaAGCCTTTGGAaTTCcAGgAAGG	2	17853824	-	4	1
DNA	GTAGCCT-TGGATTTCAAGCANGG	tTAaCCTTTGGATTTgAAGgAGGG	1	37106449	-	4	1
DNA	GTAGCCT-TGGATTTCAAGCANGG	GTAGCCaTTaGATTaaAAGCAAGG	1	37403338	+	4	1
DNA	GTAGCCT-TGGATTTCAAGCANGG	GTctCCTATaaATTTCAAGCATGG	3	53662871	+	4	1
DNA	GTAGCCT-TGGATTTCAAGCANGG	GTAGCCTATaGATaaCAAaCAAGG	4	54152098	-	4	1
DNA	GTAGCCT-TGGATTTCAAGCANGG	GTAGCCTATaGATaaCAAaCAGGG	4	54127770	-	4	1
DNA	GTAGCCT-TGGATTTCAAGCANGG	GTAGCCTATaGATaaCAAaCAAGG	4	54140892	-	4	1
DNA	GTAGCC-TTGGATTTCAAGCANGG	GgAtCCATTGGAgTTCAAGCcTGG	scaffold0408	558	+	4	1
DNA	GTAGCC-TTGGATTTCAAGCANGG	GTAcCCCTTcGAcTTCAAGaACGG	scaffold0043	40945	+	4	1
DNA	GTAGCC-TTGGATTTCAAGCANGG	aTAGCaCTTGGATTTgAgGCATGG	6	9540912	+	4	1
DNA	GTAGCC-TTGGATTTCAAGCANGG	GgAtCCATTGGAgTTCAAGCcTGG	6	14753480	-	4	1
DNA	GTAGCC-TTGGATTTCAAGCANGG	tTAGaaAcTGGATTTCAAGCATGG	6	16994282	-	4	1
DNA	GTAGCC-TTGGATTTCAAGCANGG	GTAGgCGTcGGAgTTCAAaCACGG	8	3449299	-	4	1
DNA	GTAGCC-TTGGATTTCAAGCANGG	GcAGCCATTtGATTTgAtGCAAGG	8	32319126	+	4	1
DNA	GTAGCC-TTGGATTTCAAGCANGG	aTAGCCTTaGGATTaCAAaCACGG	8	34069186	-	4	1
DNA	GTAGCC-TTGGATTTCAAGCANGG	GaAGCCTTTGGAaTTCcAGgAAGG	2	17853824	-	4	1
DNA	GTAGCC-TTGGATTTCAAGCANGG	tTAaCCTTTGGATTTgAAGgAGGG	1	37106449	-	4	1
DNA	GTAGCC-TTGGATTTCAAGCANGG	GcAtCCCTTGGATTTagAGCATGG	4	50397317	+	4	1
DNA	GTAGC-CTTGGATTTCAAGCANGG	GTAGCCaTTaGATTaaAAGCAAGG	scaffold0517	4713	-	4	1
DNA	GTAGC-CTTGGATTTCAAGCANGG	GgAGtTCTTGaATTTgAAGCAAGG	scaffold0049	35742	+	4	1
DNA	GTAGC-CTTGGATTTCAAGCANGG	GTAcCCCTTcGAcTTCAAGaACGG	scaffold0043	40945	+	4	1
DNA	GTAGC-CTTGGATTTCAAGCANGG	tTAGaAacTGGATTTCAAGCATGG	6	16994282	-	4	1
DNA	GTAGC-CTTGGATTTCAAGCANGG	tTgGCTCTTGcATTTCAAGaAAGG	8	36709228	+	4	1
DNA	GTAGC-CTTGGATTTCAAGCANGG	GTtGCTCaTaGtTTTCAAGCATGG	2	21819226	+	4	1
DNA	GTAGC-CTTGGATTTCAAGCANGG	GTAGCACTactATcTCAAGCATGG	7	251804	-	4	1
DNA	GTAGC-CTTGGATTTCAAGCANGG	GctGCACTTGGATcTCAAtCAAGG	7	37976089	-	4	1
DNA	GTAGC-CTTGGATTTCAAGCANGG	tTAGCTCTTGaATTTCcAaCATGG	7	44019146	-	4	1
DNA	GTAGC-CTTGGATTTCAAGCANGG	GTAGCCaTTaGATTaaAAGCAAGG	1	37403338	+	4	1
DNA	GTAGC-CTTGGATTTCAAGCANGG	GTtatTCTTGGATTTCcAGCATGG	3	4773709	-	4	1
DNA	GTAGC-CTTGGATTTCAAGCANGG	GTcGtACTTGGATTTCAtGCtTGG	4	7405054	-	4	1
DNA	GTAGC-CTTGGATTTCAAGCANGG	GcAtCCCTTGGATTTagAGCATGG	4	50397317	+	4	1
DNA	GTAGC-CTTGGATTTCAAGCANGG	GTtGaGCTTGGATTTCAAttATGG	4	52053459	+	4	1
DNA	GTAGC-CTTGGATTTCAAGCANGG	GTAGgACaTtGATTTCAAaCACGG	4	54974084	-	4	1
DNA	GTAG-CCTTGGATTTCAAGCANGG	GTAGCCaTTaGATTaaAAGCAAGG	scaffold0517	4713	-	4	1
DNA	GTAG-CCTTGGATTTCAAGCANGG	GgAGTtCTTGaATTTgAAGCAAGG	scaffold0049	35742	+	4	1
DNA	GTAG-CCTTGGATTTCAAGCANGG	GTAcCCCTTcGAcTTCAAGaACGG	scaffold0043	40945	+	4	1
DNA	GTAG-CCTTGGATTTCAAGCANGG	aTAGCaCTTGGATTTgAgGCATGG	6	9540912	+	4	1
DNA	GTAG-CCTTGGATTTCAAGCANGG	tTAGAaacTGGATTTCAAGCATGG	6	16994282	-	4	1
DNA	GTAG-CCTTGGATTTCAAGCANGG	tgAGGCCTTtGATTTCAAGaATGG	6	18070003	-	4	1
DNA	GTAG-CCTTGGATTTCAAGCANGG	GTAGGCgTcGGAgTTCAAaCACGG	8	3449299	-	4	1
DNA	GTAG-CCTTGGATTTCAAGCANGG	aTAcTCCTTtGATTTtAAGCATGG	7	19024391	-	4	1
DNA	GTAG-CCTTGGATTTCAAGCANGG	cgtaGCCTTGGATTTCAAGCATGG	7	19508663	+	4	1
DNA	GTAG-CCTTGGATTTCAAGCANGG	aTAcTCCTTtGATTTtAAGCATGG	7	20730220	+	4	1
DNA	GTAG-CCTTGGATTTCAAGCANGG	GTAGCCaTTaGATTaaAAGCAAGG	1	37403338	+	4	1
DNA	GTAG-CCTTGGATTTCAAGCANGG	GTtaTtCTTGGATTTCcAGCATGG	3	4773709	-	4	1
DNA	GTAG-CCTTGGATTTCAAGCANGG	GTcGTaCTTGGATTTCAtGCtTGG	4	7405054	-	4	1
DNA	GTAG-CCTTGGATTTCAAGCANGG	GcAtCCCTTGGATTTagAGCATGG	4	50397317	+	4	1
DNA	GTAG-CCTTGGATTTCAAGCANGG	GTtGAgCTTGGATTTCAAttATGG	4	52053459	+	4	1
DNA	GTAG-CCTTGGATTTCAAGCANGG	GTAGGaCaTtGATTTCAAaCACGG	4	54974084	-	4	1
DNA	GTA-GCCTTGGATTTCAAGCANGG	GTACcCCTTcGAcTTCAAGaACGG	scaffold0043	40945	+	4	1
DNA	GTA-GCCTTGGATTTCAAGCANGG	tgAGGCCTTtGATTTCAAGaATGG	6	18070003	-	4	1
DNA	GTA-GCCTTGGATTTCAAGCANGG	GTAGGCgTcGGAgTTCAAaCACGG	8	3449299	-	4	1
DNA	GTA-GCCTTGGATTTCAAGCANGG	GTACGgaTTGGtTTTCAAaCATGG	8	42240753	+	4	1
DNA	GTA-GCCTTGGATTTCAAGCANGG	GTATGCaTTtGATTTCActCATGG	2	43006141	+	4	1
DNA	GTA-GCCTTGGATTTCAAGCANGG	aTACtCCTTtGATTTtAAGCATGG	7	19024391	-	4	1
DNA	GTA-GCCTTGGATTTCAAGCANGG	aTACtCCTTtGATTTtAAGCATGG	7	20730220	+	4	1
DNA	GTA-GCCTTGGATTTCAAGCANGG	GTtAttCTTGGATTTCcAGCATGG	3	4773709	-	4	1
DNA	GTA-GCCTTGGATTTCAAGCANGG	aTAAGtaTTGGATgTCAAGCATGG	3	12411880	+	4	1
DNA	GTA-GCCTTGGATTTCAAGCANGG	GTAAGCaTTGaATaTgAAGCATGG	3	26565172	+	4	1
DNA	GTA-GCCTTGGATTTCAAGCANGG	aTATGCCTTGaATcTtAAGCATGG	3	27735076	-	4	1
DNA	GTA-GCCTTGGATTTCAAGCANGG	caATGCCTTGtcTTTCAAGCAAGG	4	16290865	+	4	1
DNA	GTA-GCCTTGGATTTCAAGCANGG	GcATcCCTTGGATTTagAGCATGG	4	50397317	+	4	1
DNA	GTA-GCCTTGGATTTCAAGCANGG	GTAGGaCaTtGATTTCAAaCACGG	4	54974084	-	4	1
DNA	GT-AGCCTTGGATTTCAAGCANGG	GTAgaCCcTGcATTTCAAGCATGG	6	12737177	+	4	1
DNA	GT-AGCCTTGGATTTCAAGCANGG	GTTAaCCTTaGATgTCAAGaAAGG	1	38574662	+	4	1
DNA	GT-AGCCTTGGATTTCAAGCANGG	aTAAGtaTTGGATgTCAAGCATGG	3	12411880	+	4	1
DNA	GT-AGCCTTGGATTTCAAGCANGG	GTAAGCaTTGaATaTgAAGCATGG	3	26565172	+	4	1
DNA	G-TAGCCTTGGATTTCAAGCANGG	GTTAaCCTTaGATgTCAAGaAAGG	1	38574662	+	4	1
RNA	GTAGCCTTGGATTTCAAGCANGG	Ga-tCCaccGATTTCAAGCACGG	scaffold1313	1629	-	5	1
RNA	GTAGCCTTGGATTTCAAGCANGG	GT-GCCaTcGATTaCAAagATGG	scaffold0939	223	-	5	1
RNA	GTAGCCTTGGATTTCAAGCANGG	GT-tCCTTGGATaTCAAattGGG	scaffold0437	1574	+	5	1
RNA	GTAGCCTTGGATTTCAAGCANGG	aT-cCaTTGGAgTTCAAGCcTGG	scaffold0408	560	+	5	1
RNA	GTAGCCTTGGATTTCAAGCANGG	tT-GCtTTGcATTTtAtGCATGG	scaffold0376	7074	-	5	1
RNA	GTAGCCTTGGATTTCAAGCANGG	Ga-tCCTTGtATcTCAAtCATGG	scaffold0356	16443	-	5	1
RNA	GTAGCCTTGGATTTCAAGCANGG	aT-tCCTTtGtgTTCAAGCAAGG	scaffold0303	8516	-	5	1
RNA	GTAGCCTTGGATTTCAAGCANGG	Gc-GatTTGGATTTaAAaCAAGG	scaffold0255	14795	+	5	1
RNA	GTAGCCTTGGATTTCAAGCANGG	ac-GCtTTGGATTTtcAGCACGG	scaffold0126	11523	+	5	1
RNA	GTAGCCTTGGATTTCAAGCANGG	GT-GgCTTGGAgaggAAGCATGG	scaffold0125	8480	-	5	1
RNA	GTAGCCTTGGATTTCAAGCANGG	GT-GtgTgGGtTTTCAAGgAGGG	scaffold0039	7624	-	5	1
RNA	GTAGCCTTGGATTTCAAGCANGG	GT-GgCTTGGAgaggAAGCATGG	scaffold0031	17983	+	5	1
RNA	GTAGCCTTGGATTTCAAGCANGG	aT-GCCTTGaAgTTCtgGCATGG	scaffold0030	131765	+	5	1
RNA	GTAGCCTTGGATTTCAAGCANGG	Ga-GaCTTGGAgTTCAtGgAGGG	scaffold0030	129722	+	5	1
RNA	GTAGCCTTGGATTTCAAGCANGG	aT-GCCTTGaAgTTCcgGCATGG	scaffold0030	124786	+	5	1
RNA	GTAGCCTTGGATTTCAAGCANGG	GT-GaaTTGGATcTCAAatAAGG	scaffold0009	283	-	5	1
RNA	GTAGCCTTGGATTTCAAGCANGG	aT-GCCTTGGATTaaAAtCcGGG	scaffold0001	81193	+	5	1
RNA	GTAGCCTTGGATTTCAAGCANGG	GT-GCCaTGGAaTTCcttCAAGG	6	987646	-	5	1
RNA	GTAGCCTTGGATTTCAAGCANGG	GT-GgCTgGaATTTCAcaCAGGG	6	1714854	-	5	1
RNA	GTAGCCTTGGATTTCAAGCANGG	GT-cCCTTcGgTTTtAAGaATGG	6	2759993	+	5	1
RNA	GTAGCCTTGGATTTCAAGCANGG	GT-aCCTTGGATaTagAaCATGG	6	5321113	-	5	1
RNA	GTAGCCTTGGATTTCAAGCANGG	GT-tCtTTGGAgTTCgAaCACGG	6	9689543	-	5	1
RNA	GTAGCCTTGGATTTCAAGCANGG	tT-GaCgTaaATTTCAAGCATGG	6	11844314	+	5	1
RNA	GTAGCCTTGGATTTCAAGCANGG	GT-GgCcgGGATTTgAAcCACGG	6	12184554	-	5	1
RNA	GTAGCCTTGGATTTCAAGCANGG	ag-aCCcTGcATTTCAAGCATGG	6	12737179	+	5	1
RNA	GTAGCCTTGGATTTCAAGCANGG	GT-GCaTTtGtTTTtAAGaAAGG	6	14767073	-	5	1
RNA	GTAGCCTTGGATTTCAAGCANGG	aT-cCaTTGGAgTTCAAGCcTGG	6	14753480	-	5	1
RNA	GTAGCCTTGGATTTCAAGCANGG	GT-GgCTgGGATTTgAAaCtCGG	6	16130811	-	5	1
RNA	GTAGCCTTGGATTTCAAGCANGG	Gc-tCCTTGaAaTTtAAGCATGG	6	16809697	-	5	1
RNA	GTAGCCTTGGATTTCAAGCANGG	GT-GCCTTGcAcTTCAgagAAGG	6	20161302	+	5	1
RNA	GTAGCCTTGGATTTCAAGCANGG	GT-GCCTTGGtTTTgtgGCtTGG	6	20764391	+	5	1
RNA	GTAGCCTTGGATTTCAAGCANGG	GT-GCCTTGcAcTTCAgagAAGG	6	22171506	-	5	1
RNA	GTAGCCTTGGATTTCAAGCANGG	tT-ttCTTGGAaTTCAAtCAGGG	6	22787543	-	5	1
RNA	GTAGCCTTGGATTTCAAGCANGG	GT-GtCTTGGATTcaAAtCcCGG	6	24117481	+	5	1
RNA	GTAGCCTTGGATTTCAAGCANGG	GT-aCCTTGGtTTggAAGaAAGG	6	25377462	+	5	1
RNA	GTAGCCTTGGATTTCAAGCANGG	cT-ttCTTGtATTTCgAGCAAGG	6	25485098	+	5	1
RNA	GTAGCCTTGGATTTCAAGCANGG	cT-GtCTTGtATTTtgAGCAAGG	6	25581758	+	5	1
RNA	GTAGCCTTGGATTTCAAGCANGG	cT-atCTTGtATTTCgAGCAAGG	6	26057956	+	5	1
RNA	GTAGCCTTGGATTTCAAGCANGG	cT-atCTTGtATTTCgAGCAAGG	6	26077926	+	5	1
RNA	GTAGCCTTGGATTTCAAGCANGG	cT-atCTTGtATTTCgAGCAAGG	6	26144904	+	5	1
RNA	GTAGCCTTGGATTTCAAGCANGG	GT-GtCTTGaATcTtAAaCATGG	6	28027354	+	5	1
RNA	GTAGCCTTGGATTTCAAGCANGG	Gg-GCCTTaaATTTtgAGCACGG	6	28985303	+	5	1
RNA	GTAGCCTTGGATTTCAAGCANGG	tT-GCtTTGGAaTTtAAGaAGGG	6	30123191	+	5	1
RNA	GTAGCCTTGGATTTCAAGCANGG	GT-GCtTTGGAgTTttAGgAGGG	6	31215718	+	5	1
RNA	GTAGCCTTGGATTTCAAGCANGG	tT-aCCTgGcATTTCAAGaAGGG	6	31784885	-	5	1
RNA	GTAGCCTTGGATTTCAAGCANGG	tT-GgaTTtGATTTCAtGCAGGG	6	33173470	+	5	1
RNA	GTAGCCTTGGATTTCAAGCANGG	aT-tCCTTGGtTTcCAAGCtTGG	6	34312218	+	5	1
RNA	GTAGCCTTGGATTTCAAGCANGG	tT-GgCTTGaATcaCAAGCAGGG	5	414014	+	5	1
RNA	GTAGCCTTGGATTTCAAGCANGG	tT-cCCTTtaATTgCAAGCATGG	5	2770321	+	5	1
RNA	GTAGCCTTGGATTTCAAGCANGG	GT-GCCTTatcTTgCAtGCATGG	5	4108886	+	5	1
RNA	GTAGCCTTGGATTTCAAGCANGG	tT-GCCaTGGATTTtAAGttGGG	5	4474017	+	5	1
RNA	GTAGCCTTGGATTTCAAGCANGG	GT-aCCTTGcATTTaAcaCATGG	5	4823575	+	5	1
RNA	GTAGCCTTGGATTTCAAGCANGG	tT-cCCTgGGATaTCAAaCAGGG	5	5277163	-	5	1
RNA	GTAGCCTTGGATTTCAAGCANGG	tc-cCCTTGGAcTTgAAGCAAGG	5	6709178	-	5	1
RNA	GTAGCCTTGGATTTCAAGCANGG	GT-GCtTTGGATTcCAgagATGG	5	7817542	-	5	1
RNA	GTAGCCTTGGATTTCAAGCANGG	GT-GCCTTGGAaTTggAtaAGGG	5	11083509	+	5	1
RNA	GTAGCCTTGGATTTCAAGCANGG	tT-GCCaTtGtTTTgAAGCAAGG	5	12568422	-	5	1
RNA	GTAGCCTTGGATTTCAAGCANGG	tg-GCtTTGGATTTgAAGgATGG	5	13849253	-	5	1
RNA	GTAGCCTTGGATTTCAAGCANGG	GT-cCCTTGatTcTCAAGgAAGG	5	15196948	-	5	1
RNA	GTAGCCTTGGATTTCAAGCANGG	GT-GCtTTGGtgTgCAgGCAGGG	5	15694920	-	5	1
RNA	GTAGCCTTGGATTTCAAGCANGG	cT-cCCTTGGATgTCcAtCAAGG	5	18080113	+	5	1
RNA	GTAGCCTTGGATTTCAAGCANGG	aT-tCCTTtGtgTTCAAGCAAGG	5	21755856	+	5	1
RNA	GTAGCCTTGGATTTCAAGCANGG	cT-cCCTTcGAcTTCAAGaACGG	5	22441994	+	5	1
RNA	GTAGCCTTGGATTTCAAGCANGG	tg-GCaTTGGATTTgAAGgATGG	5	23350534	-	5	1
RNA	GTAGCCTTGGATTTCAAGCANGG	GT-cCtTTGGggTTCAAGCgTGG	5	28231735	+	5	1
RNA	GTAGCCTTGGATTTCAAGCANGG	aT-tCCTTtGtgTTCAAGCAAGG	5	30950622	-	5	1
RNA	GTAGCCTTGGATTTCAAGCANGG	GT-ctCTaGGgTTaCAAGCAGGG	5	33446462	+	5	1
RNA	GTAGCCTTGGATTTCAAGCANGG	GT-caCTTtGATTTCAAaaATGG	5	33481652	+	5	1
RNA	GTAGCCTTGGATTTCAAGCANGG	GT-GCtTTGGggTTtAtGCATGG	5	33640878	-	5	1
RNA	GTAGCCTTGGATTTCAAGCANGG	tg-GCtTTGGATTTgAAGgATGG	5	34827710	-	5	1
RNA	GTAGCCTTGGATTTCAAGCANGG	GT-GCagTGGtTTTggAGCATGG	5	39962375	+	5	1
RNA	GTAGCCTTGGATTTCAAGCANGG	GT-GaCTTatATTTgAAaCATGG	5	40114901	+	5	1
RNA	GTAGCCTTGGATTTCAAGCANGG	Ga-GgCTTtGAaTTgAAGCAAGG	5	41446365	+	5	1
RNA	GTAGCCTTGGATTTCAAGCANGG	Ga-GgCTTtGAaTTgAAGCAAGG	5	41433645	+	5	1
RNA	GTAGCCTTGGATTTCAAGCANGG	aT-GCCTTttATTgCtAGCATGG	5	42464771	+	5	1
RNA	GTAGCCTTGGATTTCAAGCANGG	cT-tCCTTGaATTcCAAGCcAGG	8	326274	+	5	1
RNA	GTAGCCTTGGATTTCAAGCANGG	GT-GCCaTGGAaTTCcttCAAGG	8	1997354	+	5	1
RNA	GTAGCCTTGGATTTCAAGCANGG	GT-GaCTTtGtTTgCAAGaATGG	8	2618825	+	5	1
RNA	GTAGCCTTGGATTTCAAGCANGG	GT-GaCTTtatTTgCAAGCATGG	8	2630534	+	5	1
RNA	GTAGCCTTGGATTTCAAGCANGG	cT-GCtacGGATcTCAAGCAAGG	8	4297087	-	5	1
RNA	GTAGCCTTGGATTTCAAGCANGG	aT-GCCTTGGAaTTCtctCATGG	8	5249767	+	5	1
RNA	GTAGCCTTGGATTTCAAGCANGG	aT-GCCTTGGAaTTCcgtCATGG	8	5272758	-	5	1
RNA	GTAGCCTTGGATTTCAAGCANGG	GT-aCCTTGagaTTgAAGCAAGG	8	5859896	+	5	1
RNA	GTAGCCTTGGATTTCAAGCANGG	cT-tCCTTGtgTTgCAAGCAAGG	8	5800336	-	5	1
RNA	GTAGCCTTGGATTTCAAGCANGG	Ga-cCCTTGGATTcCAgGtATGG	8	6272469	-	5	1
RNA	GTAGCCTTGGATTTCAAGCANGG	GT-GCCaccGATTcCAAGaAGGG	8	7095471	-	5	1
RNA	GTAGCCTTGGATTTCAAGCANGG	Ga-GCgTTGGATTTCAtcgACGG	8	7652857	+	5	1
RNA	GTAGCCTTGGATTTCAAGCANGG	Ga-GCtTTGGtTTTCAAatAGGG	8	8273064	+	5	1
RNA	GTAGCCTTGGATTTCAAGCANGG	GT-GgtcTaGATTTCAAGCtCGG	8	10558678	+	5	1
RNA	GTAGCCTTGGATTTCAAGCANGG	cT-aCCTTcaATTTCAAGCtTGG	8	14356743	+	5	1
RNA	GTAGCCTTGGATTTCAAGCANGG	GT-aCCaTGGATTTtAgGCtTGG	8	14313850	-	5	1
RNA	GTAGCCTTGGATTTCAAGCANGG	GT-GCtTTtGATTTgAAGttGGG	8	14710374	+	5	1
RNA	GTAGCCTTGGATTTCAAGCANGG	cT-GgCaTGGATTTtAAcCATGG	8	16497248	-	5	1
RNA	GTAGCCTTGGATTTCAAGCANGG	GT-tgCTTtGATaTCAAGCgTGG	8	16672709	-	5	1
RNA	GTAGCCTTGGATTTCAAGCANGG	GT-GCCaTcGgTTTCgAGgATGG	8	22502686	-	5	1
RNA	GTAGCCTTGGATTTCAAGCANGG	aT-GtCTTGGATTagAAGaAAGG	8	24277027	+	5	1
RNA	GTAGCCTTGGATTTCAAGCANGG	GT-tgCTTGGATTTtAcGCtAGG	8	27315712	-	5	1
RNA	GTAGCCTTGGATTTCAAGCANGG	GT-GCaTTtGATTTaAAtgATGG	8	29927373	-	5	1
RNA	GTAGCCTTGGATTTCAAGCANGG	GT-GtCTTGGAcTTCAgtCtTGG	8	30250535	-	5	1
RNA	GTAGCCTTGGATTTCAAGCANGG	GT-GgCTaGGATTTgAAcCtCGG	8	30741304	+	5	1
RNA	GTAGCCTTGGATTTCAAGCANGG	tT-GgCTTGaATTTCAtaCAGGG	8	31869495	-	5	1
RNA	GTAGCCTTGGATTTCAAGCANGG	tT-tCCTTaagTTTCAAGCAAGG	8	33616894	+	5	1
RNA	GTAGCCTTGGATTTCAAGCANGG	Gg-ctCTTGcATTTCAAGaAAGG	8	36709230	+	5	1
RNA	GTAGCCTTGGATTTCAAGCANGG	GT-taCTTGGATcaaAAGCAAGG	8	42697999	+	5	1
RNA	GTAGCCTTGGATTTCAAGCANGG	Gg-agCTTGGATTaCAAGtATGG	2	517503	+	5	1
RNA	GTAGCCTTGGATTTCAAGCANGG	GT-GttgTGaATTTgAAGCATGG	2	1393051	-	5	1
RNA	GTAGCCTTGGATTTCAAGCANGG	GT-GaCTcGGgTTcCAAcCAGGG	2	1633952	-	5	1
RNA	GTAGCCTTGGATTTCAAGCANGG	GT-taCTTGcATTTCAtaCATGG	2	3361958	-	5	1
RNA	GTAGCCTTGGATTTCAAGCANGG	aT-tCCTTtGtgTTCAAGCAAGG	2	4460704	+	5	1
RNA	GTAGCCTTGGATTTCAAGCANGG	aT-tCCTTtGtgTTCAAGCAAGG	2	5344349	-	5	1
RNA	GTAGCCTTGGATTTCAAGCANGG	aT-GCaTTGcATTgCAtGCACGG	2	6373381	+	5	1
RNA	GTAGCCTTGGATTTCAAGCANGG	GT-GCaTTtcATTTCAcGtACGG	2	7083426	-	5	1
RNA	GTAGCCTTGGATTTCAAGCANGG	tT-GttTTGGATTTCcAtCATGG	2	7895053	-	5	1
RNA	GTAGCCTTGGATTTCAAGCANGG	GT-GCCTTGGgTTctAAaCtCGG	2	9440906	-	5	1
RNA	GTAGCCTTGGATTTCAAGCANGG	GT-GCCTTGGgTTctAAaCtCGG	2	9452132	-	5	1
RNA	GTAGCCTTGGATTTCAAGCANGG	GT-GCCTgaaATTTtAAaCAAGG	2	13009054	+	5	1
RNA	GTAGCCTTGGATTTCAAGCANGG	GT-GCgaTGGATTcaAAGaATGG	2	13200992	-	5	1
RNA	GTAGCCTTGGATTTCAAGCANGG	tT-GCtTTGGtTTcCAtGCAGGG	2	17117377	+	5	1
RNA	GTAGCCTTGGATTTCAAGCANGG	cT-GgCTgGGATTTCcAaCACGG	2	17712269	+	5	1
RNA	GTAGCCTTGGATTTCAAGCANGG	GT-tCCTaGGgTTTCAcaCAGGG	2	17959490	+	5	1
RNA	GTAGCCTTGGATTTCAAGCANGG	GT-GCtTTGGATTTtAAtagTGG	2	23214155	+	5	1
RNA	GTAGCCTTGGATTTCAAGCANGG	Ga-cCgTTGGATTTaAAtCAAGG	2	25616904	+	5	1
RNA	GTAGCCTTGGATTTCAAGCANGG	GT-GCCTTaGtTTTggAGaATGG	2	29570121	+	5	1
RNA	GTAGCCTTGGATTTCAAGCANGG	GT-GCCTTaGtTTTggAGaATGG	2	29613255	+	5	1
RNA	GTAGCCTTGGATTTCAAGCANGG	GT-GCCTTaGtTTTggAGaATGG	2	29579465	+	5	1
RNA	GTAGCCTTGGATTTCAAGCANGG	tg-GCaTTGGATTTgAAGgATGG	2	29811311	+	5	1
RNA	GTAGCCTTGGATTTCAAGCANGG	tg-GCtTTGGATTTgAAGgATGG	2	30215038	+	5	1
RNA	GTAGCCTTGGATTTCAAGCANGG	tT-GCtTTGGATTTgtAaCATGG	2	31410112	-	5	1
RNA	GTAGCCTTGGATTTCAAGCANGG	GT-GCtTTttATaTCAtGCATGG	2	32900047	+	5	1
RNA	GTAGCCTTGGATTTCAAGCANGG	tT-tCCTTGGAaaTCAAcCATGG	2	34391900	+	5	1
RNA	GTAGCCTTGGATTTCAAGCANGG	tT-GtgTTGGATTcCAAaCAAGG	2	34329719	-	5	1
RNA	GTAGCCTTGGATTTCAAGCANGG	tT-GCCTTGatTTTgAAGgAGGG	2	34677857	+	5	1
RNA	GTAGCCTTGGATTTCAAGCANGG	GT-aCCTTGGATTcaAAtCtTGG	2	37816754	-	5	1
RNA	GTAGCCTTGGATTTCAAGCANGG	GT-cCCTTtGAaaTCAAGaATGG	2	41973231	-	5	1
RNA	GTAGCCTTGGATTTCAAGCANGG	aT-GCaTTtGATTTCActCATGG	2	43006143	+	5	1
RNA	GTAGCCTTGGATTTCAAGCANGG	Gc-aCCaTGGtTTTCAAaCAAGG	2	43238749	+	5	1
RNA	GTAGCCTTGGATTTCAAGCANGG	cT-GCCTTaGATaTtAAaCATGG	2	43766692	-	5	1
RNA	GTAGCCTTGGATTTCAAGCANGG	tT-GgCTTGGATTTCAAcggCGG	7	942098	+	5	1
RNA	GTAGCCTTGGATTTCAAGCANGG	GT-GtCTTGGATgTtgAaCATGG	7	1096988	-	5	1
RNA	GTAGCCTTGGATTTCAAGCANGG	GT-GtCTTGGATgTtgAaCATGG	7	1560292	+	5	1
RNA	GTAGCCTTGGATTTCAAGCANGG	tc-cCCTTGGAcTTCAAGaACGG	7	1376342	-	5	1
RNA	GTAGCCTTGGATTTCAAGCANGG	GT-GtCTTGGATgTtgAaCATGG	7	1571929	-	5	1
RNA	GTAGCCTTGGATTTCAAGCANGG	GT-GCCTTGGtaTgCAAaCtTGG	7	3204364	+	5	1
RNA	GTAGCCTTGGATTTCAAGCANGG	GT-caCTTtGATTTgAAtCAAGG	7	3335016	+	5	1
RNA	GTAGCCTTGGATTTCAAGCANGG	GT-GCCTTGGtaTgCAAaCtTGG	7	3180713	-	5	1
RNA	GTAGCCTTGGATTTCAAGCANGG	aT-GCaTgGaATTTCcAGCAAGG	7	3819227	+	5	1
RNA	GTAGCCTTGGATTTCAAGCANGG	Gg-GagTTGGATTTgcAGCAGGG	7	4498709	+	5	1
RNA	GTAGCCTTGGATTTCAAGCANGG	Gg-GagTTGGATTTgcAGCAGGG	7	4329177	-	5	1
RNA	GTAGCCTTGGATTTCAAGCANGG	tT-tCCTTGGAcagCAAGCAAGG	7	4559854	-	5	1
RNA	GTAGCCTTGGATTTCAAGCANGG	aT-cCCTTGGATTgCAcaCAGGG	7	7138187	+	5	1
RNA	GTAGCCTTGGATTTCAAGCANGG	GT-aCCTgGGgcTaCAAGCAGGG	7	7493643	-	5	1
RNA	GTAGCCTTGGATTTCAAGCANGG	GT-cCCTTcGAaaTCAAGaATGG	7	9008621	-	5	1
RNA	GTAGCCTTGGATTTCAAGCANGG	GT-GtCTTtGgTTTCcAaCACGG	7	9883547	-	5	1
RNA	GTAGCCTTGGATTTCAAGCANGG	GT-ttCTTcGATTTCAAtaATGG	7	11902371	+	5	1
RNA	GTAGCCTTGGATTTCAAGCANGG	aT-cCCTctGtTTTCAAGCAAGG	7	12708373	-	5	1
RNA	GTAGCCTTGGATTTCAAGCANGG	GT-GtaTTGGtTTTCcAcCACGG	7	12904927	-	5	1
RNA	GTAGCCTTGGATTTCAAGCANGG	GT-GggTTGacTTTCAAcCATGG	7	18073638	+	5	1
RNA	GTAGCCTTGGATTTCAAGCANGG	GT-GtCTTtGATcTgtAGCAAGG	7	18967607	+	5	1
RNA	GTAGCCTTGGATTTCAAGCANGG	Ga-GCtTTGaATTTCttGCAAGG	7	18759701	-	5	1
RNA	GTAGCCTTGGATTTCAAGCANGG	GT-GatTTtGtTTTCAAGaAAGG	7	19253090	+	5	1
RNA	GTAGCCTTGGATTTCAAGCANGG	ac-tCCTTtGATTTtAAGCATGG	7	19024391	-	5	1
RNA	GTAGCCTTGGATTTCAAGCANGG	aT-GCCTTGGATcagAAGaAAGG	7	19143814	-	5	1
RNA	GTAGCCTTGGATTTCAAGCANGG	tT-GCtTTGGgTTTtAAGCtTGG	7	19350127	-	5	1
RNA	GTAGCCTTGGATTTCAAGCANGG	ac-tCCTTtGATTTtAAGCATGG	7	20730222	+	5	1
RNA	GTAGCCTTGGATTTCAAGCANGG	aT-GCCTTcaATaTCAAcCATGG	7	20468364	-	5	1
RNA	GTAGCCTTGGATTTCAAGCANGG	aT-GCCTTGGATcagAAGaAAGG	7	20743213	-	5	1
RNA	GTAGCCTTGGATTTCAAGCANGG	GT-GaCTTccAgTgCAAGCAAGG	7	25094494	+	5	1
RNA	GTAGCCTTGGATTTCAAGCANGG	GT-GttTTGttTTTCAAtCATGG	7	28847616	-	5	1
RNA	GTAGCCTTGGATTTCAAGCANGG	aT-GaCTTGaATTTgAcGCAGGG	7	34882926	-	5	1
RNA	GTAGCCTTGGATTTCAAGCANGG	GT-GCCaTGGAaTTCcttCAAGG	7	35252538	-	5	1
RNA	GTAGCCTTGGATTTCAAGCANGG	aT-GCtTTGGAcTgCAAGaAAGG	7	35765779	-	5	1
RNA	GTAGCCTTGGATTTCAAGCANGG	aT-GCCTTtGgTTaCAAGtAAGG	7	36804758	-	5	1
RNA	GTAGCCTTGGATTTCAAGCANGG	GT-aCCTTGGATTTgtAttATGG	7	37087136	-	5	1
RNA	GTAGCCTTGGATTTCAAGCANGG	aT-tCCaTGGATTTCAgGtATGG	7	37296308	-	5	1
RNA	GTAGCCTTGGATTTCAAGCANGG	tT-GaCTTGaAaTaCAAGCATGG	7	38551196	-	5	1
RNA	GTAGCCTTGGATTTCAAGCANGG	GT-GgCaTacATgTCAAGCAGGG	7	40084906	-	5	1
RNA	GTAGCCTTGGATTTCAAGCANGG	tg-GCCTTGGATgTCtAGaAGGG	7	40709451	+	5	1
RNA	GTAGCCTTGGATTTCAAGCANGG	tg-GCtTTGGATTTgAAGgATGG	7	41254360	-	5	1
RNA	GTAGCCTTGGATTTCAAGCANGG	cT-GCCTTGGcTTTaAtGtATGG	7	41488466	+	5	1
RNA	GTAGCCTTGGATTTCAAGCANGG	Ga-tCCTTGGATTgatAGCATGG	7	41768533	-	5	1
RNA	GTAGCCTTGGATTTCAAGCANGG	GT-GCCTataATTTCAgGtATGG	7	42725630	+	5	1
RNA	GTAGCCTTGGATTTCAAGCANGG	GT-ctCTTGcATTTCAAGttTGG	7	48495334	+	5	1
RNA	GTAGCCTTGGATTTCAAGCANGG	tT-ttCTTGacTTTCAAGCAAGG	1	715048	-	5	1
RNA	GTAGCCTTGGATTTCAAGCANGG	GT-GCCTTtGtcTTgAtGCAGGG	1	1270421	+	5	1
RNA	GTAGCCTTGGATTTCAAGCANGG	GT-GCtTTGGATTctgAGtAAGG	1	1238874	-	5	1
RNA	GTAGCCTTGGATTTCAAGCANGG	GT-GtCcTGcATTgaAAGCAGGG	1	2036473	+	5	1
RNA	GTAGCCTTGGATTTCAAGCANGG	tT-GCtTTtGATaTCAAGtATGG	1	3090657	-	5	1
RNA	GTAGCCTTGGATTTCAAGCANGG	GT-GtCacGaATTTCAgGCAGGG	1	3282243	-	5	1
RNA	GTAGCCTTGGATTTCAAGCANGG	GT-GCCTgGatTaTCAgGCAAGG	1	4760492	-	5	1
RNA	GTAGCCTTGGATTTCAAGCANGG	GT-GCCaTtGATaTaAAGgAAGG	1	5760126	+	5	1
RNA	GTAGCCTTGGATTTCAAGCANGG	GT-GCtTTGttTTTCcAcCAAGG	1	5859610	+	5	1
RNA	GTAGCCTTGGATTTCAAGCANGG	tT-GCCTTtGATTTCAttCtGGG	1	6360909	+	5	1
RNA	GTAGCCTTGGATTTCAAGCANGG	tT-GCCTTtGATTTCAttCtAGG	1	6400185	+	5	1
RNA	GTAGCCTTGGATTTCAAGCANGG	GT-cgCTTGGgTTTgAAcCACGG	1	10654439	+	5	1
RNA	GTAGCCTTGGATTTCAAGCANGG	Ga-GCCTTGcAaTcCAAaCATGG	1	11227247	+	5	1
RNA	GTAGCCTTGGATTTCAAGCANGG	aT-GCaTTtGATTTtAAGaATGG	1	11553891	-	5	1
RNA	GTAGCCTTGGATTTCAAGCANGG	tT-atgTTGcATTTCAAGCATGG	1	12401741	-	5	1
RNA	GTAGCCTTGGATTTCAAGCANGG	tT-GCCaTGGATccCAtGCATGG	1	13305986	+	5	1
RNA	GTAGCCTTGGATTTCAAGCANGG	Gg-GgCTgGGATTTaAAcCACGG	1	13406492	+	5	1
RNA	GTAGCCTTGGATTTCAAGCANGG	GT-GCCTTtttTTTCAAaaAAGG	1	13679763	-	5	1
RNA	GTAGCCTTGGATTTCAAGCANGG	GT-aCCTTcaAgTTCAAGaATGG	1	14072338	-	5	1
RNA	GTAGCCTTGGATTTCAAGCANGG	tg-GCaTTGaATTTgAAGCATGG	1	15414974	+	5	1
RNA	GTAGCCTTGGATTTCAAGCANGG	tT-aCCTTGGAcTgCAAGaATGG	1	20145104	-	5	1
RNA	GTAGCCTTGGATTTCAAGCANGG	GT-GaCTTttATTTCAAatAAGG	1	20993695	-	5	1
RNA	GTAGCCTTGGATTTCAAGCANGG	tc-cCCTTGGATTTCcAtCAAGG	1	22576035	+	5	1
RNA	GTAGCCTTGGATTTCAAGCANGG	tT-GagTgGGtTTTCAAGCAAGG	1	23250378	+	5	1
RNA	GTAGCCTTGGATTTCAAGCANGG	Ga-GCCTTGGggacCAAGCAAGG	1	23908076	+	5	1
RNA	GTAGCCTTGGATTTCAAGCANGG	GT-GtCaTtcATTaCAAGCATGG	1	23538904	-	5	1
RNA	GTAGCCTTGGATTTCAAGCANGG	aT-GCCTcGGATTaCAAcCtTGG	1	27083720	-	5	1
RNA	GTAGCCTTGGATTTCAAGCANGG	aT-GCCTcGGATTaCAAcCtTGG	1	27081128	-	5	1
RNA	GTAGCCTTGGATTTCAAGCANGG	Ga-GCCTaGcATTTCAAcaATGG	1	28306312	-	5	1
RNA	GTAGCCTTGGATTTCAAGCANGG	cT-GCCTTGGATTgaAgtCATGG	1	28349865	-	5	1
RNA	GTAGCCTTGGATTTCAAGCANGG	Gg-GCCTcGGATTcaAAGgACGG	1	29035315	+	5	1
RNA	GTAGCCTTGGATTTCAAGCANGG	aT-GaCTTtGATTTCAAGggTGG	1	31515092	-	5	1
RNA	GTAGCCTTGGATTTCAAGCANGG	tg-GCaTTGGATTTgAAGgATGG	1	33804873	+	5	1
RNA	GTAGCCTTGGATTTCAAGCANGG	GT-GaCTTccATgcCAAGCATGG	1	37807368	-	5	1
RNA	GTAGCCTTGGATTTCAAGCANGG	aT-GCCacGGATTTCAAGttAGG	1	39354051	-	5	1
RNA	GTAGCCTTGGATTTCAAGCANGG	GT-GCtTTtGAaTTgAAaCAAGG	1	40303871	+	5	1
RNA	GTAGCCTTGGATTTCAAGCANGG	tT-cCCaTGGtTTgCAAGCATGG	1	40363236	+	5	1
RNA	GTAGCCTTGGATTTCAAGCANGG	aT-GtCaTGGATTTtAAcCATGG	1	40779308	+	5	1
RNA	GTAGCCTTGGATTTCAAGCANGG	Ga-GCCTTGGAggTgAAGaAAGG	1	41002576	+	5	1
RNA	GTAGCCTTGGATTTCAAGCANGG	cT-GgCaTGGATTTtAAcCATGG	1	40778810	-	5	1
RNA	GTAGCCTTGGATTTCAAGCANGG	GT-GCaTTtGAcTTgAtGCAAGG	1	43131486	-	5	1
RNA	GTAGCCTTGGATTTCAAGCANGG	aT-GCaTTtGAaTTgAAGCAGGG	1	43986935	+	5	1
RNA	GTAGCCTTGGATTTCAAGCANGG	tg-GCaTTGGATTTgAAGgATGG	1	44710173	-	5	1
RNA	GTAGCCTTGGATTTCAAGCANGG	cT-GCtagGGATcTCAAGCAAGG	1	45984303	+	5	1
RNA	GTAGCCTTGGATTTCAAGCANGG	tT-GCCTTGGgTTTCgActATGG	1	46914313	+	5	1
RNA	GTAGCCTTGGATTTCAAGCANGG	cT-GCCcTGGATaTaAAGtAAGG	1	47153040	-	5	1
RNA	GTAGCCTTGGATTTCAAGCANGG	cT-taCTTGGtTTTgAAGCAAGG	1	48329606	+	5	1
RNA	GTAGCCTTGGATTTCAAGCANGG	tT-GCtTTGGATgTCAAagATGG	1	49103440	+	5	1
RNA	GTAGCCTTGGATTTCAAGCANGG	aa-GCacTGGATTTgAAGCATGG	1	49747358	+	5	1
RNA	GTAGCCTTGGATTTCAAGCANGG	Ga-GtCTTGaATaTCAtGCATGG	1	49774181	-	5	1
RNA	GTAGCCTTGGATTTCAAGCANGG	tg-GCtTTGGATTTgAAGgATGG	1	50517928	+	5	1
RNA	GTAGCCTTGGATTTCAAGCANGG	GT-GCCTTtGATTTttcGCtAGG	3	2780786	-	5	1
RNA	GTAGCCTTGGATTTCAAGCANGG	aT-tCCTTtGtgTTCAAGCAAGG	3	4373861	+	5	1
RNA	GTAGCCTTGGATTTCAAGCANGG	GT-GCCTataATTTCAgGtATGG	3	4827949	+	5	1
RNA	GTAGCCTTGGATTTCAAGCANGG	ta-ttCTTGGATTTCcAGCATGG	3	4773709	-	5	1
RNA	GTAGCCTTGGATTTCAAGCANGG	GT-cCCTTGaATTTaAtGCtTGG	3	5701963	-	5	1
RNA	GTAGCCTTGGATTTCAAGCANGG	GT-cCCTTGaATTTgAtGCtTGG	3	5790606	-	5	1
RNA	GTAGCCTTGGATTTCAAGCANGG	GT-GCaTgGGATgTCgAcCATGG	3	6779035	+	5	1
RNA	GTAGCCTTGGATTTCAAGCANGG	Gg-GggTaGGgTTTCAAGCAGGG	3	6831762	-	5	1
RNA	GTAGCCTTGGATTTCAAGCANGG	GT-GtCTTGGtacTCAAGgAAGG	3	7170021	+	5	1
RNA	GTAGCCTTGGATTTCAAGCANGG	GT-GCCaccGATTcCAAGaAGGG	3	8376307	+	5	1
RNA	GTAGCCTTGGATTTCAAGCANGG	Gc-GCtTTGcATTTaAAaCATGG	3	10698781	+	5	1
RNA	GTAGCCTTGGATTTCAAGCANGG	tT-GgtTTGGcTTTCAcGCAAGG	3	11025243	-	5	1
RNA	GTAGCCTTGGATTTCAAGCANGG	aT-GCaTTtaATTTtAAGCAGGG	3	11420560	+	5	1
RNA	GTAGCCTTGGATTTCAAGCANGG	aa-GtaTTGGATgTCAAGCATGG	3	12411882	+	5	1
RNA	GTAGCCTTGGATTTCAAGCANGG	tT-aCCTTtGtTTTCAAcCATGG	3	13961068	+	5	1
RNA	GTAGCCTTGGATTTCAAGCANGG	GT-GCaTaGGATTTtcAtCATGG	3	14793771	+	5	1
RNA	GTAGCCTTGGATTTCAAGCANGG	Ga-GCaaTtGATTTCAtGCATGG	3	14559912	-	5	1
RNA	GTAGCCTTGGATTTCAAGCANGG	tT-aCCTTtGtTTTCAAcCATGG	3	15383635	-	5	1
RNA	GTAGCCTTGGATTTCAAGCANGG	GT-GCtTTGGAgTTggAGtAAGG	3	21133305	-	5	1
RNA	GTAGCCTTGGATTTCAAGCANGG	Gg-tCtTTtGATTTtAAGCAAGG	3	24625146	+	5	1
RNA	GTAGCCTTGGATTTCAAGCANGG	GT-aCCTTGGATcgtAcGCAAGG	3	27305782	-	5	1
RNA	GTAGCCTTGGATTTCAAGCANGG	Gg-ttCTTtGATTTCAAGCtTGG	3	28577515	+	5	1
RNA	GTAGCCTTGGATTTCAAGCANGG	GT-GCCTTtGATTTaAtGatTGG	3	32856820	+	5	1
RNA	GTAGCCTTGGATTTCAAGCANGG	cT-GgCaTGGATTTtAAcCATGG	3	34224489	+	5	1
RNA	GTAGCCTTGGATTTCAAGCANGG	cT-GgCTTcagTTTCAAGCAAGG	3	34033787	-	5	1
RNA	GTAGCCTTGGATTTCAAGCANGG	Gg-GtgTTGGATgTCAAGgAGGG	3	34509509	+	5	1
RNA	GTAGCCTTGGATTTCAAGCANGG	aT-GgCTTGGATTggAAtCATGG	3	34794142	+	5	1
RNA	GTAGCCTTGGATTTCAAGCANGG	aT-GtCTTGGATTTaAAGttTGG	3	37623843	-	5	1
RNA	GTAGCCTTGGATTTCAAGCANGG	GT-GCtTTtGtcTTCAAGtATGG	3	39793206	+	5	1
RNA	GTAGCCTTGGATTTCAAGCANGG	ca-GCCTTaGATTaCAAGtAAGG	3	43745051	-	5	1
RNA	GTAGCCTTGGATTTCAAGCANGG	GT-GCgTTGGAccTgAAtCACGG	3	44149135	+	5	1
RNA	GTAGCCTTGGATTTCAAGCANGG	tT-GCtaTaGATTTCAAaCAAGG	3	45046549	-	5	1
RNA	GTAGCCTTGGATTTCAAGCANGG	GT-GCCaTaGgaTTCAAGaAGGG	3	47009361	+	5	1
RNA	GTAGCCTTGGATTTCAAGCANGG	tg-GCtTTGGATTTgAAGgATGG	3	48096238	+	5	1
RNA	GTAGCCTTGGATTTCAAGCANGG	GT-cCaTTtGAgaTCAAGCATGG	3	49955403	+	5	1
RNA	GTAGCCTTGGATTTCAAGCANGG	aT-GCCcTtaATTTCAAcCACGG	3	49681773	-	5	1
RNA	GTAGCCTTGGATTTCAAGCANGG	tT-GCCTTtcATTTCAgcCATGG	3	53011368	-	5	1
RNA	GTAGCCTTGGATTTCAAGCANGG	GT-GCtTTGaAgTTtAAGCcAGG	3	53398220	+	5	1
RNA	GTAGCCTTGGATTTCAAGCANGG	tT-GaCgTaaATTTCAAGCATGG	3	53285423	-	5	1
RNA	GTAGCCTTGGATTTCAAGCANGG	tT-GgCaTaaATTTCAAGCATGG	3	54139183	-	5	1
RNA	GTAGCCTTGGATTTCAAGCANGG	Gg-GCCTTGGAgagCAAGaAAGG	3	55027676	-	5	1
RNA	GTAGCCTTGGATTTCAAGCANGG	Ga-tCCTTcaATTTCAAGtATGG	4	2717886	+	5	1
RNA	GTAGCCTTGGATTTCAAGCANGG	tT-GaCTTGtAcTaCAAGCAAGG	4	4648512	-	5	1
RNA	GTAGCCTTGGATTTCAAGCANGG	GT-GCCTTcGATaTgAAGttGGG	4	4658209	-	5	1
RNA	GTAGCCTTGGATTTCAAGCANGG	aT-aCaTTGGATcTCAAGCtTGG	4	4925512	-	5	1
RNA	GTAGCCTTGGATTTCAAGCANGG	aT-tCCTTtGtgTTCAAGCAAGG	4	5300285	-	5	1
RNA	GTAGCCTTGGATTTCAAGCANGG	G-AcCCgTGGAaTTCgAtCATGG	scaffold0840	5270	-	5	1
RNA	GTAGCCTTGGATTTCAAGCANGG	G-AGCgTTGGAgTgCtAaCATGG	scaffold0464	11520	-	5	1
RNA	GTAGCCTTGGATTTCAAGCANGG	G-AtCCTTGGATTgatgGCATGG	scaffold0432	8215	+	5	1
RNA	GTAGCCTTGGATTTCAAGCANGG	G-AGCCTTGGggTaaAAaCATGG	scaffold0424	14822	+	5	1
RNA	GTAGCCTTGGATTTCAAGCANGG	G-cGatTTGGATTTaAAaCAAGG	scaffold0255	14795	+	5	1
RNA	GTAGCCTTGGATTTCAAGCANGG	G-AGCaTTGGAgTTCtAaCtTGG	scaffold0244	1706	+	5	1
RNA	GTAGCCTTGGATTTCAAGCANGG	a-cGCtTTGGATTTtcAGCACGG	scaffold0126	11523	+	5	1
RNA	GTAGCCTTGGATTTCAAGCANGG	G-AtCCTTGttTTcCAAtCATGG	scaffold0118	24002	-	5	1
RNA	GTAGCCTTGGATTTCAAGCANGG	G-AGCCTTGGAgcaaAAGaAAGG	scaffold0117	45061	-	5	1
RNA	GTAGCCTTGGATTTCAAGCANGG	G-tcaCaTGGtTTTCAAGCAGGG	scaffold0091	35511	+	5	1
RNA	GTAGCCTTGGATTTCAAGCANGG	G-tcaCaTGGtTTTCAAGCAGGG	scaffold0091	38743	-	5	1
RNA	GTAGCCTTGGATTTCAAGCANGG	t-AtCCTTGatTTTCAAGCcTGG	scaffold0066	38366	-	5	1
RNA	GTAGCCTTGGATTTCAAGCANGG	G-AGtCTTGGAgcaCAAGaAAGG	scaffold0059	12755	+	5	1
RNA	GTAGCCTTGGATTTCAAGCANGG	G-AGCtTcaGATccCAAGCAAGG	scaffold0057	53762	-	5	1
RNA	GTAGCCTTGGATTTCAAGCANGG	c-AtCCTTtaATTTtAAGCAGGG	scaffold0043	53692	-	5	1
RNA	GTAGCCTTGGATTTCAAGCANGG	G-AGCCggGGATTTgAAcCcTGG	scaffold0038	37415	-	5	1
RNA	GTAGCCTTGGATTTCAAGCANGG	G-AGtCTTGGAgcaCAAGaAAGG	scaffold0013	232620	-	5	1
RNA	GTAGCCTTGGATTTCAAGCANGG	G-AtCCTTccAaTTCAAcCAAGG	scaffold0004	37305	-	5	1
RNA	GTAGCCTTGGATTTCAAGCANGG	G-AtCCTTtGtTTTCtAaCATGG	scaffold0002	152593	-	5	1
RNA	GTAGCCTTGGATTTCAAGCANGG	G-AtCCTTtGtTTTCtAaCATGG	scaffold0002	144288	-	5	1
RNA	GTAGCCTTGGATTTCAAGCANGG	G-AGtCTTGGATcaaAAGaAAGG	6	210475	-	5	1
RNA	GTAGCCTTGGATTTCAAGCANGG	G-AGaCTTtGATTTaAAtaATGG	6	1978905	-	5	1
RNA	GTAGCCTTGGATTTCAAGCANGG	G-AGCCTTtaATaTCAtcCACGG	6	4119881	+	5	1
RNA	GTAGCCTTGGATTTCAAGCANGG	t-AGCCaTaGAcTTCAAaCATGG	6	5532584	-	5	1
RNA	GTAGCCTTGGATTTCAAGCANGG	c-AGCCTTGaATaTgcAGCAGGG	6	6061628	+	5	1
RNA	GTAGCCTTGGATTTCAAGCANGG	G-AtCCTTGGATTgatgGCATGG	6	7093038	+	5	1
RNA	GTAGCCTTGGATTTCAAGCANGG	G-AGtaTTGGAgTTCAAttATGG	6	8046522	-	5	1
RNA	GTAGCCTTGGATTTCAAGCANGG	G-AtCCTTGGATTgatgGCATGG	6	8482347	-	5	1
RNA	GTAGCCTTGGATTTCAAGCANGG	G-AtCCTTGGATTgatgGCATGG	6	8753884	-	5	1
RNA	GTAGCCTTGGATTTCAAGCANGG	a-gaCCcTGcATTTCAAGCATGG	6	12737179	+	5	1
RNA	GTAGCCTTGGATTTCAAGCANGG	a-AGCCTTaatTTTCcAGCAAGG	6	16146090	-	5	1
RNA	GTAGCCTTGGATTTCAAGCANGG	G-ctCCTTGaAaTTtAAGCATGG	6	16809697	-	5	1
RNA	GTAGCCTTGGATTTCAAGCANGG	c-AGCaaTGaATTcCAAGCATGG	6	18047000	-	5	1
RNA	GTAGCCTTGGATTTCAAGCANGG	G-AtCCTTGtATcaCAAtCATGG	6	18858257	+	5	1
RNA	GTAGCCTTGGATTTCAAGCANGG	a-AGtCTgGaATTTCAAaCATGG	6	21264139	-	5	1
RNA	GTAGCCTTGGATTTCAAGCANGG	G-AGgtTTaGgTTTCAAtCAGGG	6	23271534	-	5	1
RNA	GTAGCCTTGGATTTCAAGCANGG	G-AGaCaTGtgTTTCAAGgATGG	6	24895677	+	5	1
RNA	GTAGCCTTGGATTTCAAGCANGG	G-AGCCTTGGAgcaaAAGaAAGG	6	25626043	+	5	1
RNA	GTAGCCTTGGATTTCAAGCANGG	G-AGCCggGGATTTgAAcCcTGG	6	28237253	-	5	1
RNA	GTAGCCTTGGATTTCAAGCANGG	G-gGCCTTaaATTTtgAGCACGG	6	28985303	+	5	1
RNA	GTAGCCTTGGATTTCAAGCANGG	G-AGCCgTtGATTTCAtaCtTGG	6	29406631	+	5	1
RNA	GTAGCCTTGGATTTCAAGCANGG	G-AGCCaTtGATTTCAtGttTGG	6	29423566	+	5	1
RNA	GTAGCCTTGGATTTCAAGCANGG	G-AGCCaTtGATTTCAtGttTGG	6	29458822	-	5	1
RNA	GTAGCCTTGGATTTCAAGCANGG	G-AtCtTTGtATcTCAAtCATGG	6	30883026	+	5	1
RNA	GTAGCCTTGGATTTCAAGCANGG	G-tGCCcTGGAaTTCAActAGGG	6	31950477	-	5	1
RNA	GTAGCCTTGGATTTCAAGCANGG	G-tGCCaacGAaTTCAAGCATGG	6	32189490	-	5	1
RNA	GTAGCCTTGGATTTCAAGCANGG	t-AGtaaTGGATTTCAAtCAGGG	5	3767501	+	5	1
RNA	GTAGCCTTGGATTTCAAGCANGG	t-ccCCTTGGAcTTgAAGCAAGG	5	6709178	-	5	1
RNA	GTAGCCTTGGATTTCAAGCANGG	G-ActtTTGGATTTCcAcCATGG	5	8476639	+	5	1
RNA	GTAGCCTTGGATTTCAAGCANGG	G-AtCtTTGGAgTgCAAGtATGG	5	8892833	+	5	1
RNA	GTAGCCTTGGATTTCAAGCANGG	G-AtaaTTGGcTTcCAAGCAAGG	5	8709706	-	5	1
RNA	GTAGCCTTGGATTTCAAGCANGG	G-AGtCTTGGAgTaaAAGaAAGG	5	9729225	-	5	1
RNA	GTAGCCTTGGATTTCAAGCANGG	G-AGCCTTttgTTTCAAGttTGG	5	10809955	+	5	1
RNA	GTAGCCTTGGATTTCAAGCANGG	a-AGCCaTGaATTTaAAGCtAGG	5	13760057	-	5	1
RNA	GTAGCCTTGGATTTCAAGCANGG	t-gGCtTTGGATTTgAAGgATGG	5	13849253	-	5	1
RNA	GTAGCCTTGGATTTCAAGCANGG	G-AGCtgTaGATcTCAAcCAGGG	5	15244399	+	5	1
RNA	GTAGCCTTGGATTTCAAGCANGG	G-AaCaTTGaATTTgtAGCATGG	5	15424908	+	5	1
RNA	GTAGCCTTGGATTTCAAGCANGG	G-AaCCaTGGtTaTgAAGCATGG	5	15405148	-	5	1
RNA	GTAGCCTTGGATTTCAAGCANGG	G-AaaCTTGGATTaCAAagAAGG	5	15464831	-	5	1
RNA	GTAGCCTTGGATTTCAAGCANGG	G-AGatTTGGgTgTCAAGaAAGG	5	17137041	-	5	1
RNA	GTAGCCTTGGATTTCAAGCANGG	G-AtCCTTctATcTCAAtCAAGG	5	19341254	-	5	1
RNA	GTAGCCTTGGATTTCAAGCANGG	G-AGCCTTaGATTTtAccCtTGG	5	19343326	-	5	1
RNA	GTAGCCTTGGATTTCAAGCANGG	G-AGtCTTGGAgTaaAAGaAAGG	5	20832793	-	5	1
RNA	GTAGCCTTGGATTTCAAGCANGG	G-AGtCTTGGATaaaAAGaAAGG	5	23110423	+	5	1
RNA	GTAGCCTTGGATTTCAAGCANGG	t-gGCaTTGGATTTgAAGgATGG	5	23350534	-	5	1
RNA	GTAGCCTTGGATTTCAAGCANGG	G-AtgggTGGATTTCAAGCgTGG	5	24527862	+	5	1
RNA	GTAGCCTTGGATTTCAAGCANGG	G-AGtgaTGaATTTgAAGCATGG	5	25522345	+	5	1
RNA	GTAGCCTTGGATTTCAAGCANGG	G-AcCCTTtGATcTCAAcCgCGG	5	27628174	-	5	1
RNA	GTAGCCTTGGATTTCAAGCANGG	G-AGCCcatGAgTTCAAaCATGG	5	28810995	+	5	1
RNA	GTAGCCTTGGATTTCAAGCANGG	G-tGCgTTGaATTTgAAGCtAGG	5	29596199	+	5	1
RNA	GTAGCCTTGGATTTCAAGCANGG	G-AGtgTTGaATTTCgtGCATGG	5	29746390	+	5	1
RNA	GTAGCCTTGGATTTCAAGCANGG	G-AGgCTgaGgTTTCAAtCAGGG	5	30050827	-	5	1
RNA	GTAGCCTTGGATTTCAAGCANGG	t-AtCCTTGGtTTTaAAcCAAGG	5	34350860	+	5	1
RNA	GTAGCCTTGGATTTCAAGCANGG	t-gGCtTTGGATTTgAAGgATGG	5	34827710	-	5	1
RNA	GTAGCCTTGGATTTCAAGCANGG	G-AtCCTTGGATTgatgGCATGG	5	40974233	-	5	1
RNA	GTAGCCTTGGATTTCAAGCANGG	c-AtaCTTGaATTTaAAGCATGG	8	3567162	-	5	1
RNA	GTAGCCTTGGATTTCAAGCANGG	c-tGCtaTGGATcTCAAGCAAGG	8	4788070	+	5	1
RNA	GTAGCCTTGGATTTCAAGCANGG	G-AGatTTGGAgTTCAAaCtTGG	8	8809877	+	5	1
RNA	GTAGCCTTGGATTTCAAGCANGG	G-AGCCTTtctTTTgAAGgAAGG	8	11935712	+	5	1
RNA	GTAGCCTTGGATTTCAAGCANGG	t-tttCTTGGATTTCAgGCATGG	8	16103284	+	5	1
RNA	GTAGCCTTGGATTTCAAGCANGG	G-AGtCTTGGAgTaaAAGaAAGG	8	18230992	-	5	1
RNA	GTAGCCTTGGATTTCAAGCANGG	a-AGCCgTGagTTTCAAGCtTGG	8	18616857	+	5	1
RNA	GTAGCCTTGGATTTCAAGCANGG	c-AGCCaTGGATTgCAtGCtTGG	8	21601195	-	5	1
RNA	GTAGCCTTGGATTTCAAGCANGG	G-tGCCTTcaAaTTaAAGCAAGG	8	27820385	+	5	1
RNA	GTAGCCTTGGATTTCAAGCANGG	G-AaCCTTGGtTgTCAAaCgGGG	8	27977572	+	5	1
RNA	GTAGCCTTGGATTTCAAGCANGG	G-AaCCTTGGtTgTCAAaCgGGG	8	28034841	+	5	1
RNA	GTAGCCTTGGATTTCAAGCANGG	G-AGCCaTaaATTTCAActATGG	8	29791914	-	5	1
RNA	GTAGCCTTGGATTTCAAGCANGG	t-AGCCaTGttTgTCAAGCATGG	8	32770450	-	5	1
RNA	GTAGCCTTGGATTTCAAGCANGG	a-AtCtTTGcATTTCAAGtAGGG	8	35175757	+	5	1
RNA	GTAGCCTTGGATTTCAAGCANGG	G-AGgCTTGGAacaCAAGtAAGG	8	35255385	-	5	1
RNA	GTAGCCTTGGATTTCAAGCANGG	G-AGtaTTcGATTTCAAaCtAGG	8	36205002	+	5	1
RNA	GTAGCCTTGGATTTCAAGCANGG	G-gctCTTGcATTTCAAGaAAGG	8	36709230	+	5	1
RNA	GTAGCCTTGGATTTCAAGCANGG	G-AaaCTTGGATTaCAAagAAGG	8	36979680	-	5	1
RNA	GTAGCCTTGGATTTCAAGCANGG	G-AGCaTTGGtTTTCtAatAGGG	8	37485660	-	5	1
RNA	GTAGCCTTGGATTTCAAGCANGG	G-AaCCaTGGATTcCAtGtAAGG	8	38079331	-	5	1
RNA	GTAGCCTTGGATTTCAAGCANGG	a-AGCaTTGaATTTCAAttAAGG	8	38654306	+	5	1
RNA	GTAGCCTTGGATTTCAAGCANGG	G-tGtCTTcaATTTCAAGtACGG	8	44754445	+	5	1
RNA	GTAGCCTTGGATTTCAAGCANGG	t-AaCCcTaGATTTCAAtCATGG	8	44805871	+	5	1
RNA	GTAGCCTTGGATTTCAAGCANGG	G-gagCTTGGATTaCAAGtATGG	2	517503	+	5	1
RNA	GTAGCCTTGGATTTCAAGCANGG	G-AGaCTTGaAaacCAAGCAGGG	2	1105999	-	5	1
RNA	GTAGCCTTGGATTTCAAGCANGG	c-tGCtTTcGATTTCcAGCATGG	2	2193413	-	5	1
RNA	GTAGCCTTGGATTTCAAGCANGG	a-AGCCaaGGATgTCAAGaATGG	2	2409801	-	5	1
RNA	GTAGCCTTGGATTTCAAGCANGG	G-AcCCTccaATTTCAAGCtAGG	2	4343339	-	5	1
RNA	GTAGCCTTGGATTTCAAGCANGG	G-tGCCcTGGATTgttAGCAGGG	2	5369636	+	5	1
RNA	GTAGCCTTGGATTTCAAGCANGG	c-AtgCTTGcATTTgAAGCATGG	2	5405541	+	5	1
RNA	GTAGCCTTGGATTTCAAGCANGG	G-AGatTaGGATTTgAAGaAGGG	2	6556755	-	5	1
RNA	GTAGCCTTGGATTTCAAGCANGG	G-AGCaTTtGgTTTtcAGCAAGG	2	10654061	-	5	1
RNA	GTAGCCTTGGATTTCAAGCANGG	a-AGaCTTGcATcTCAAGtATGG	2	11369814	+	5	1
RNA	GTAGCCTTGGATTTCAAGCANGG	t-AaCCTcGGAaTTCAAGgACGG	2	13524639	-	5	1
RNA	GTAGCCTTGGATTTCAAGCANGG	G-AGCCTTttATTTatgGCAGGG	2	17106910	+	5	1
RNA	GTAGCCTTGGATTTCAAGCANGG	G-AGtCTTGGAgTaaAAGaAAGG	2	19013361	-	5	1
RNA	GTAGCCTTGGATTTCAAGCANGG	G-AaatacGGATTTCAAGCAGGG	2	20676576	-	5	1
RNA	GTAGCCTTGGATTTCAAGCANGG	G-AGCtTgtGtTTTgAAGCAAGG	2	22761920	+	5	1
RNA	GTAGCCTTGGATTTCAAGCANGG	G-AGtCTTGGAgTaaAAGaAAGG	2	23257413	-	5	1
RNA	GTAGCCTTGGATTTCAAGCANGG	G-AtCCTTGtATccCAAtCATGG	2	24247542	+	5	1
RNA	GTAGCCTTGGATTTCAAGCANGG	a-AGatTTGGATaTCAAtCATGG	2	28741679	-	5	1
RNA	GTAGCCTTGGATTTCAAGCANGG	t-gGCaTTGGATTTgAAGgATGG	2	29811311	+	5	1
RNA	GTAGCCTTGGATTTCAAGCANGG	t-gGCtTTGGATTTgAAGgATGG	2	30215038	+	5	1
RNA	GTAGCCTTGGATTTCAAGCANGG	G-AcaCTTGaAgTTgAAGCATGG	2	38538883	-	5	1
RNA	GTAGCCTTGGATTTCAAGCANGG	G-AcCCaTccATTTCAAtCAAGG	2	40917840	+	5	1
RNA	GTAGCCTTGGATTTCAAGCANGG	G-AttCTTGGgTTTCAAaCgCGG	2	40993479	+	5	1
RNA	GTAGCCTTGGATTTCAAGCANGG	G-caCCaTGGtTTTCAAaCAAGG	2	43238749	+	5	1
RNA	GTAGCCTTGGATTTCAAGCANGG	a-AGaaaTGGATTTgAAGCACGG	2	45129417	+	5	1
RNA	GTAGCCTTGGATTTCAAGCANGG	c-AGCCTTGatTTaCAgGCATGG	7	116502	+	5	1
RNA	GTAGCCTTGGATTTCAAGCANGG	c-AagCTTGGAaaTCAAGCATGG	7	856407	+	5	1
RNA	GTAGCCTTGGATTTCAAGCANGG	c-AagCTTGGAaaTCAAGCATGG	7	1214411	+	5	1
RNA	GTAGCCTTGGATTTCAAGCANGG	t-ccCCTTGGAcTTCAAGaACGG	7	1376342	-	5	1
RNA	GTAGCCTTGGATTTCAAGCANGG	G-AGCtTTGGATTTCAgaatTGG	7	1397984	-	5	1
RNA	GTAGCCTTGGATTTCAAGCANGG	G-gGagTTGGATTTgcAGCAGGG	7	4498709	+	5	1
RNA	GTAGCCTTGGATTTCAAGCANGG	G-gGagTTGGATTTgcAGCAGGG	7	4329177	-	5	1
RNA	GTAGCCTTGGATTTCAAGCANGG	G-AtCCTTGGATTgatgGCATGG	7	5554875	+	5	1
RNA	GTAGCCTTGGATTTCAAGCANGG	c-AaCCTTGttTTTCtAGCATGG	7	6560106	-	5	1
RNA	GTAGCCTTGGATTTCAAGCANGG	G-tGCCTTaGgTTTCAAtCtTGG	7	10314219	-	5	1
RNA	GTAGCCTTGGATTTCAAGCANGG	G-AGCtTgtGtTTTgAAGCAAGG	7	13353578	-	5	1
RNA	GTAGCCTTGGATTTCAAGCANGG	G-AGtgTTGGAaTaCAAGCtAGG	7	19109941	+	5	1
RNA	GTAGCCTTGGATTTCAAGCANGG	a-ctCCTTtGATTTtAAGCATGG	7	19024391	-	5	1
RNA	GTAGCCTTGGATTTCAAGCANGG	G-AtCCTTGGATTgatgGCATGG	7	19323336	+	5	1
RNA	GTAGCCTTGGATTTCAAGCANGG	G-AaCtTTGGAaTTCAAttATGG	7	19408496	+	5	1
RNA	GTAGCCTTGGATTTCAAGCANGG	G-AGaCTTGcATTTCgAGttAGG	7	19898039	-	5	1
RNA	GTAGCCTTGGATTTCAAGCANGG	a-ctCCTTtGATTTtAAGCATGG	7	20730222	+	5	1
RNA	GTAGCCTTGGATTTCAAGCANGG	G-AtCgTTtcATTTCAtGCATGG	7	21401495	+	5	1
RNA	GTAGCCTTGGATTTCAAGCANGG	G-AGaCTTGGATTTCtctgAAGG	7	21647908	+	5	1
RNA	GTAGCCTTGGATTTCAAGCANGG	G-AGCCaaGGATTTtgAGgAAGG	7	22719082	+	5	1
RNA	GTAGCCTTGGATTTCAAGCANGG	G-taCCTTGGtTTaCAAGtAGGG	7	22505129	-	5	1
RNA	GTAGCCTTGGATTTCAAGCANGG	G-AtCtTTGtATcTCAAtCATGG	7	22845504	+	5	1
RNA	GTAGCCTTGGATTTCAAGCANGG	G-tGCCTTGGATTTgtgGCtTGG	7	23579354	+	5	1
RNA	GTAGCCTTGGATTTCAAGCANGG	t-AtggTTGGATTTCAAGaAGGG	7	24922295	-	5	1
RNA	GTAGCCTTGGATTTCAAGCANGG	G-AtCCTTGGATTgatgGCATGG	7	29126818	-	5	1
RNA	GTAGCCTTGGATTTCAAGCANGG	G-AGCCTTGGAcaTtAgGaATGG	7	35166917	-	5	1
RNA	GTAGCCTTGGATTTCAAGCANGG	G-AGatTcaGATTTCAAtCATGG	7	36362682	-	5	1
RNA	GTAGCCTTGGATTTCAAGCANGG	t-AGCCaTGGATcTCcAcCAAGG	7	37594564	-	5	1
RNA	GTAGCCTTGGATTTCAAGCANGG	G-AaatcTGGATTTCAAtCAAGG	7	38040420	+	5	1
RNA	GTAGCCTTGGATTTCAAGCANGG	G-AtCCTTGGATTgatgGCATGG	7	38141355	+	5	1
RNA	GTAGCCTTGGATTTCAAGCANGG	G-AcCCcTGcATaTCAAGgAAGG	7	39557501	+	5	1
RNA	GTAGCCTTGGATTTCAAGCANGG	t-gGCCTTGGATgTCtAGaAGGG	7	40709451	+	5	1
RNA	GTAGCCTTGGATTTCAAGCANGG	t-gGCtTTGGATTTgAAGgATGG	7	41254360	-	5	1
RNA	GTAGCCTTGGATTTCAAGCANGG	G-AGCCTgaGgTTcCAAGtAAGG	7	42581559	+	5	1
RNA	GTAGCCTTGGATTTCAAGCANGG	G-AaCtTTGGATgcCAAaCAAGG	7	44598273	+	5	1
RNA	GTAGCCTTGGATTTCAAGCANGG	G-AtaCTTGGggTTCAAaCAGGG	7	48547268	-	5	1
RNA	GTAGCCTTGGATTTCAAGCANGG	G-AGCtTTGGtTTTCttcCATGG	7	49087317	-	5	1
RNA	GTAGCCTTGGATTTCAAGCANGG	a-AGtCTTGtATTTCAAtCtAGG	1	560077	+	5	1
RNA	GTAGCCTTGGATTTCAAGCANGG	G-AGttTTGGATTTgtAtCAAGG	1	1020856	+	5	1
RNA	GTAGCCTTGGATTTCAAGCANGG	G-AaaCTTcGATTTCAAcCtTGG	1	1422678	+	5	1
RNA	GTAGCCTTGGATTTCAAGCANGG	G-ttgCTTGGcTTTCAAGaAGGG	1	4358859	-	5	1
RNA	GTAGCCTTGGATTTCAAGCANGG	G-AtCCccGGATTcCAAtCATGG	1	4538931	-	5	1
RNA	GTAGCCTTGGATTTCAAGCANGG	G-AGgCTTGaATaTCAAagAGGG	1	5166197	-	5	1
RNA	GTAGCCTTGGATTTCAAGCANGG	c-AaaCcTGGATTTCAAGCtTGG	1	8130688	+	5	1
RNA	GTAGCCTTGGATTTCAAGCANGG	c-AtCtTgGGATTTtAAGCATGG	1	11003317	+	5	1
RNA	GTAGCCTTGGATTTCAAGCANGG	G-gGgCTgGGATTTaAAcCACGG	1	13406492	+	5	1
RNA	GTAGCCTTGGATTTCAAGCANGG	t-gGCaTTGaATTTgAAGCATGG	1	15414974	+	5	1
RNA	GTAGCCTTGGATTTCAAGCANGG	G-AGCaTacGgTTaCAAGCACGG	1	15317659	-	5	1
RNA	GTAGCCTTGGATTTCAAGCANGG	G-AtCCTTGctTTaCAAaCAAGG	1	15779427	-	5	1
RNA	GTAGCCTTGGATTTCAAGCANGG	t-AGCtTTGGcTaTCAAGgAAGG	1	16970328	-	5	1
RNA	GTAGCCTTGGATTTCAAGCANGG	G-AGtCTTGGtgagCAAGCAAGG	1	17878399	+	5	1
RNA	GTAGCCTTGGATTTCAAGCANGG	G-AGagTgGGgTTTCAAaCAAGG	1	21617157	-	5	1
RNA	GTAGCCTTGGATTTCAAGCANGG	t-ccCCTTGGATTTCcAtCAAGG	1	22576035	+	5	1
RNA	GTAGCCTTGGATTTCAAGCANGG	G-AGtCTaGGATTTgAtGaAAGG	1	26955417	-	5	1
RNA	GTAGCCTTGGATTTCAAGCANGG	G-AGgaTTGGtTTgCAAGCcTGG	1	27509976	+	5	1
RNA	GTAGCCTTGGATTTCAAGCANGG	G-gGCCTcGGATTcaAAGgACGG	1	29035315	+	5	1
RNA	GTAGCCTTGGATTTCAAGCANGG	c-AGtCTTGGAaTTCAgGCtGGG	1	31193177	+	5	1
RNA	GTAGCCTTGGATTTCAAGCANGG	G-tGCtTTGGtTTTgAAGCcTGG	1	31668755	-	5	1
RNA	GTAGCCTTGGATTTCAAGCANGG	G-AGgtTTGaATTcCAAtCACGG	1	32949335	-	5	1
RNA	GTAGCCTTGGATTTCAAGCANGG	t-gGCaTTGGATTTgAAGgATGG	1	33804873	+	5	1
RNA	GTAGCCTTGGATTTCAAGCANGG	a-AcCtTTGGATTgCAAGCtTGG	1	34786819	+	5	1
RNA	GTAGCCTTGGATTTCAAGCANGG	G-AtCCTTGtATccCAAtCATGG	1	36208936	+	5	1
RNA	GTAGCCTTGGATTTCAAGCANGG	G-AtCCTTGttTTcCAAtCATGG	1	36521431	+	5	1
RNA	GTAGCCTTGGATTTCAAGCANGG	a-AcCtTTGGATTTgAAGgAGGG	1	37106449	-	5	1
RNA	GTAGCCTTGGATTTCAAGCANGG	t-AaCCTTaGATgTCAAGaAAGG	1	38574664	+	5	1
RNA	GTAGCCTTGGATTTCAAGCANGG	G-AaCaTTGGcTTTCAAcgATGG	1	38142808	-	5	1
RNA	GTAGCCTTGGATTTCAAGCANGG	G-AGaaTTGcgTTcCAAGCAAGG	1	38304463	-	5	1
RNA	GTAGCCTTGGATTTCAAGCANGG	c-AGCtTgGGAgTTCAAGtAGGG	1	43301367	+	5	1
RNA	GTAGCCTTGGATTTCAAGCANGG	G-tGgaTTGcATTTCAAtCAAGG	1	44134154	-	5	1
RNA	GTAGCCTTGGATTTCAAGCANGG	G-tGgaTTGcATTTCAAtCAAGG	1	44142588	-	5	1
RNA	GTAGCCTTGGATTTCAAGCANGG	t-gGCaTTGGATTTgAAGgATGG	1	44710173	-	5	1
RNA	GTAGCCTTGGATTTCAAGCANGG	G-AcaaTTGaATTcCAAGCAAGG	1	46293238	-	5	1
RNA	GTAGCCTTGGATTTCAAGCANGG	G-AGCaTTGGATaTtcAGCcTGG	1	50163295	+	5	1
RNA	GTAGCCTTGGATTTCAAGCANGG	t-gGCtTTGGATTTgAAGgATGG	1	50517928	+	5	1
RNA	GTAGCCTTGGATTTCAAGCANGG	G-AaCaTTctATTTCAAGaATGG	1	50811256	+	5	1
RNA	GTAGCCTTGGATTTCAAGCANGG	G-AGCCaTGGccTTCAAatATGG	1	50921014	+	5	1
RNA	GTAGCCTTGGATTTCAAGCANGG	G-AGaCggtGATTTCAtGCATGG	1	51414585	+	5	1
RNA	GTAGCCTTGGATTTCAAGCANGG	G-AGtCTTGGAgTaaAAGaAAGG	3	3245421	-	5	1
RNA	GTAGCCTTGGATTTCAAGCANGG	G-AaaCTTaGATTcCAAGaATGG	3	3614290	-	5	1
RNA	GTAGCCTTGGATTTCAAGCANGG	G-AGgCTTGGAaTTatAGgACGG	3	3628134	-	5	1
RNA	GTAGCCTTGGATTTCAAGCANGG	G-AatCTTGGATTgaAAGaAAGG	3	4129511	+	5	1
RNA	GTAGCCTTGGATTTCAAGCANGG	G-gGggTaGGgTTTCAAGCAGGG	3	6831762	-	5	1
RNA	GTAGCCTTGGATTTCAAGCANGG	G-AtCCgaGGtTTTCAAtCACGG	3	7052458	-	5	1
RNA	GTAGCCTTGGATTTCAAGCANGG	G-AaCtTTGtATTTCAgGgATGG	3	7586860	-	5	1
RNA	GTAGCCTTGGATTTCAAGCANGG	a-AGCCcTGGAgTTggAGCATGG	3	8188394	-	5	1
RNA	GTAGCCTTGGATTTCAAGCANGG	G-AtCCTTGttTcTCAAtCATGG	3	10002127	+	5	1
RNA	GTAGCCTTGGATTTCAAGCANGG	G-AtCCTTGttTcTCAAtCATGG	3	10112319	+	5	1
RNA	GTAGCCTTGGATTTCAAGCANGG	G-AtCCTTGttTcTCAAtCATGG	3	10246003	+	5	1
RNA	GTAGCCTTGGATTTCAAGCANGG	G-cGCtTTGcATTTaAAaCATGG	3	10698781	+	5	1
RNA	GTAGCCTTGGATTTCAAGCANGG	G-AaCCTTaaAaTaCAAGCATGG	3	11615169	+	5	1
RNA	GTAGCCTTGGATTTCAAGCANGG	c-AtCCTTtaATTTtAAGCAGGG	3	12147222	+	5	1
RNA	GTAGCCTTGGATTTCAAGCANGG	G-AtCCTTtGtTTTCtAaCATGG	3	13162677	+	5	1
RNA	GTAGCCTTGGATTTCAAGCANGG	G-AtCCTTtGtTTTCtAaCATGG	3	13334601	+	5	1
RNA	GTAGCCTTGGATTTCAAGCANGG	G-AGCCTaGGAgTTtAAttAAGG	3	14568640	+	5	1
RNA	GTAGCCTTGGATTTCAAGCANGG	G-AGagTTGGATTTaAAttAGGG	3	15063775	-	5	1
RNA	GTAGCCTTGGATTTCAAGCANGG	G-AGtgTTGatTTTCAtGCATGG	3	16414087	+	5	1
RNA	GTAGCCTTGGATTTCAAGCANGG	G-AGtCTTGGAgTaaAAGaAAGG	3	16703498	+	5	1
RNA	GTAGCCTTGGATTTCAAGCANGG	G-AGgtTgaaATTTCAAGCAAGG	3	16789911	+	5	1
RNA	GTAGCCTTGGATTTCAAGCANGG	t-AGCaTTtGATTTCActCATGG	3	19314829	+	5	1
RNA	GTAGCCTTGGATTTCAAGCANGG	a-AGCtTTtGATTcCAAGaAAGG	3	20712490	+	5	1
RNA	GTAGCCTTGGATTTCAAGCANGG	G-AttCTTaaAcTTCAAGCATGG	3	22739158	+	5	1
RNA	GTAGCCTTGGATTTCAAGCANGG	G-AttCTTaaAcTTCAAGCATGG	3	22727802	-	5	1
RNA	GTAGCCTTGGATTTCAAGCANGG	G-gtCtTTtGATTTtAAGCAAGG	3	24625146	+	5	1
RNA	GTAGCCTTGGATTTCAAGCANGG	a-AGCaTTGaATaTgAAGCATGG	3	26565174	+	5	1
RNA	GTAGCCTTGGATTTCAAGCANGG	c-AtCCTTtaATTTtAAGCAGGG	3	27348427	+	5	1
RNA	GTAGCCTTGGATTTCAAGCANGG	c-AtCCTTtaATTTtAAGCAGGG	3	27377767	+	5	1
RNA	GTAGCCTTGGATTTCAAGCANGG	a-tGCCTTGaATcTtAAGCATGG	3	27735076	-	5	1
RNA	GTAGCCTTGGATTTCAAGCANGG	G-AttCTTtGATTTaAAGCtTGG	3	28583910	+	5	1
RNA	GTAGCCTTGGATTTCAAGCANGG	G-tcCCTTGGtTacCAAGCAAGG	3	28192895	-	5	1
RNA	GTAGCCTTGGATTTCAAGCANGG	G-gttCTTtGATTTCAAGCtTGG	3	28577515	+	5	1
RNA	GTAGCCTTGGATTTCAAGCANGG	G-AttCTTaGATTTCAAtCtGGG	3	29950965	+	5	1
RNA	GTAGCCTTGGATTTCAAGCANGG	G-AttCTTaGATTTCAAtCtGGG	3	30000119	+	5	1
RNA	GTAGCCTTGGATTTCAAGCANGG	t-AGtCTTctcTTTCAAGCATGG	3	32739362	+	5	1
RNA	GTAGCCTTGGATTTCAAGCANGG	G-AGgCaaGGATTaCAAGgATGG	3	34078435	-	5	1
RNA	GTAGCCTTGGATTTCAAGCANGG	G-gGtgTTGGATgTCAAGgAGGG	3	34509509	+	5	1
RNA	GTAGCCTTGGATTTCAAGCANGG	a-AGCCTaGaAaTTCAAaCATGG	3	34969540	+	5	1
RNA	GTAGCCTTGGATTTCAAGCANGG	c-AtCtTTGGATcTCAAGgAAGG	3	35653676	+	5	1
RNA	GTAGCCTTGGATTTCAAGCANGG	a-AtCaTTaGATTTCAAaCAAGG	3	39445304	-	5	1
RNA	GTAGCCTTGGATTTCAAGCANGG	t-ActtTTGGATTgCAAGCATGG	3	42040148	+	5	1
RNA	GTAGCCTTGGATTTCAAGCANGG	G-AtCtTTGGATTTgAtGtATGG	3	42101006	-	5	1
RNA	GTAGCCTTGGATTTCAAGCANGG	a-AGCCaTGGcaTTCAtGCATGG	3	45169406	-	5	1
RNA	GTAGCCTTGGATTTCAAGCANGG	G-AGCCTcaGATTaatAGCAAGG	3	45972663	+	5	1
RNA	GTAGCCTTGGATTTCAAGCANGG	G-tGCCTTccAcTTCAAGaAAGG	3	46047205	-	5	1
RNA	GTAGCCTTGGATTTCAAGCANGG	t-gGCtTTGGATTTgAAGgATGG	3	48096238	+	5	1
RNA	GTAGCCTTGGATTTCAAGCANGG	G-AGtgTTGaATTTCgtGCATGG	3	48774422	+	5	1
RNA	GTAGCCTTGGATTTCAAGCANGG	G-ActCTTGagTTTCAAGaATGG	3	50132577	+	5	1
RNA	GTAGCCTTGGATTTCAAGCANGG	G-AGagTTGGtTTTgAAGCtTGG	3	51314188	-	5	1
RNA	GTAGCCTTGGATTTCAAGCANGG	a-ActCTTGtATTTCcAGCAAGG	3	52542026	-	5	1
RNA	GTAGCCTTGGATTTCAAGCANGG	G-tGCCTTGaAgTTtAAGCcAGG	3	53440404	+	5	1
RNA	GTAGCCTTGGATTTCAAGCANGG	G-gGCCTTGGAgagCAAGaAAGG	3	55027676	-	5	1
RNA	GTAGCCTTGGATTTCAAGCANGG	a-AtCCTTGaATTgCAAtCACGG	3	55218189	-	5	1
RNA	GTAGCCTTGGATTTCAAGCANGG	G-ActCTgGcATTTCAAtCAAGG	4	1655968	+	5	1
RNA	GTAGCCTTGGATTTCAAGCANGG	G-tGCCTTGtAaTTCgAaCATGG	4	2132594	+	5	1
RNA	GTAGCCTTGGATTTCAAGCANGG	G-tGtCaTGatTTTCAAGCAGGG	4	5396228	+	5	1
RNA	GTAGCCTTGGATTTCAAGCANGG	G-tGtCTTtGgTTTCAAGgAGGG	4	6990372	-	5	1
RNA	GTAGCCTTGGATTTCAAGCANGG	G-AGtCTaGGATTcgAAtCAGGG	4	7154026	-	5	1
RNA	GTAGCCTTGGATTTCAAGCANGG	GTgGCCTTGG-gggCAAcCATGG	scaffold2096	548	-	5	1
RNA	GTAGCCTTGGATTTCAAGCANGG	aTAGCCTTGG-caTCActCAAGG	scaffold1284	2076	+	5	1
RNA	GTAGCCTTGGATTTCAAGCANGG	GTAcCCcTGa-cTTCAcGCAGGG	scaffold0890	1874	+	5	1
RNA	GTAGCCTTGGATTTCAAGCANGG	tTAGtCTTGG-TTTCcAcaACGG	scaffold0741	1443	+	5	1
RNA	GTAGCCTTGGATTTCAAGCANGG	GTAGCtTTtc-TTTgAAGaAAGG	scaffold0598	5907	-	5	1
RNA	GTAGCCTTGGATTTCAAGCANGG	GaAGCCTTGG-aTgtAtGCAAGG	scaffold0539	10953	-	5	1
RNA	GTAGCCTTGGATTTCAAGCANGG	GgAGagTTGG-TTTaAAGaAAGG	scaffold0299	4391	-	5	1
RNA	GTAGCCTTGGATTTCAAGCANGG	tTAGtCTTGG-TTTCcAcaACGG	scaffold0233	3734	+	5	1
RNA	GTAGCCTTGGATTTCAAGCANGG	GTAGCCTTca-TTTgAAatATGG	scaffold0156	19564	+	5	1
RNA	GTAGCCTTGGATTTCAAGCANGG	tTAGtCTTGG-TTTCcAcaACGG	scaffold0142	24394	+	5	1
RNA	GTAGCCTTGGATTTCAAGCANGG	GTttaCTTGG-aTTCAtGCATGG	scaffold0127	19941	+	5	1
RNA	GTAGCCTTGGATTTCAAGCANGG	GTtGCtTTtG-TTTCAAGatGGG	scaffold0131	18507	-	5	1
RNA	GTAGCCTTGGATTTCAAGCANGG	GTcaCaTgGt-TTTCAAGCAGGG	scaffold0091	35511	+	5	1
RNA	GTAGCCTTGGATTTCAAGCANGG	GTcaCaTgGt-TTTCAAGCAGGG	scaffold0091	38743	-	5	1
RNA	GTAGCCTTGGATTTCAAGCANGG	tTAGtCTTGG-TTTCcAcaACGG	scaffold0075	27448	-	5	1
RNA	GTAGCCTTGGATTTCAAGCANGG	cTAaCCaTGG-cTTtAAGCAGGG	scaffold0049	16169	+	5	1
RNA	GTAGCCTTGGATTTCAAGCANGG	tTAGtCTTGG-TTTCcAcaACGG	scaffold0037	49964	-	5	1
RNA	GTAGCCTTGGATTTCAAGCANGG	GTAGCCcTcG-TgTCtAGaAAGG	scaffold0030	34260	+	5	1
RNA	GTAGCCTTGGATTTCAAGCANGG	cTAaCCaTGG-cTTtAAGCAGGG	scaffold0021	164443	+	5	1
RNA	GTAGCCTTGGATTTCAAGCANGG	GgAGagTTGG-TTTaAAGaAAGG	scaffold0002	296645	-	5	1
RNA	GTAGCCTTGGATTTCAAGCANGG	GTAtgtTTGG-TTTCAAGttTGG	6	578823	+	5	1
RNA	GTAGCCTTGGATTTCAAGCANGG	agAGgCTTGG-TTTgAAGgACGG	6	1431454	-	5	1
RNA	GTAGCCTTGGATTTCAAGCANGG	GTAGCCggGG-TTTgAAcCcCGG	6	3863265	+	5	1
RNA	GTAGCCTTGGATTTCAAGCANGG	GTtttCaTaG-TTTCAAGCATGG	6	3993992	-	5	1
RNA	GTAGCCTTGGATTTCAAGCANGG	GTAGCCaTaG-TTgCAAcaAAGG	6	5581875	+	5	1
RNA	GTAGCCTTGGATTTCAAGCANGG	GTttaCTTGG-aTTCAtGCATGG	6	5748298	-	5	1
RNA	GTAGCCTTGGATTTCAAGCANGG	GTttaCTTGG-aTTCAtGCATGG	6	5858651	-	5	1
RNA	GTAGCCTTGGATTTCAAGCANGG	aTAGtCTTGG-gTTCAAGttTGG	6	6740940	-	5	1
RNA	GTAGCCTTGGATTTCAAGCANGG	GTtGCCTTGG-TTTCttttATGG	6	9882737	-	5	1
RNA	GTAGCCTTGGATTTCAAGCANGG	cTAaCCaTGG-cTTtAAGCAGGG	6	11374972	+	5	1
RNA	GTAGCCTTGGATTTCAAGCANGG	GaAGCtTTaG-TTTgAAtCATGG	6	14242917	+	5	1
RNA	GTAGCCTTGGATTTCAAGCANGG	GTgGCgTcGG-TTgCAAGCgTGG	6	14528642	-	5	1
RNA	GTAGCCTTGGATTTCAAGCANGG	tTAGtCTTGG-TTTCcAcaACGG	6	18445408	-	5	1
RNA	GTAGCCTTGGATTTCAAGCANGG	GTgGCCggGG-TTTgAAcCACGG	6	18987108	+	5	1
RNA	GTAGCCTTGGATTTCAAGCANGG	aTAGCgaTGa-TTTCAAGgATGG	6	21768323	+	5	1
RNA	GTAGCCTTGGATTTCAAGCANGG	aTtGCaTTGG-TTgCAAaCACGG	6	21810207	+	5	1
RNA	GTAGCCTTGGATTTCAAGCANGG	GTAagtTTGG-TTTCAttCAAGG	6	22723443	+	5	1
RNA	GTAGCCTTGGATTTCAAGCANGG	tTAGgCTTGG-TTTaAAtgATGG	6	23911158	-	5	1
RNA	GTAGCCTTGGATTTCAAGCANGG	cTAGCtTTaG-TgTCAgGCATGG	6	26888496	+	5	1
RNA	GTAGCCTTGGATTTCAAGCANGG	GTAGCCTTtG-TTTtAtGatTGG	6	27576184	+	5	1
RNA	GTAGCCTTGGATTTCAAGCANGG	GTAGCCTTtG-TTTtAtGatTGG	6	28097662	+	5	1
RNA	GTAGCCTTGGATTTCAAGCANGG	cTAaCCaTGG-cTTtAAGCAGGG	6	27749804	-	5	1
RNA	GTAGCCTTGGATTTCAAGCANGG	aTAaCCTTaG-TTTCtAcCATGG	6	28753080	-	5	1
RNA	GTAGCCTTGGATTTCAAGCANGG	GTAGgCTTGG-TTTtAAcacCGG	6	30387353	-	5	1
RNA	GTAGCCTTGGATTTCAAGCANGG	tTAGCtTTGa-TaaCAAGCAGGG	6	31409065	+	5	1
RNA	GTAGCCTTGGATTTCAAGCANGG	aaAGgCTTGG-TTTCtAGCtGGG	6	34653110	+	5	1
RNA	GTAGCCTTGGATTTCAAGCANGG	GaAGCCTTtG-TTTtAtGgAAGG	5	1148350	-	5	1
RNA	GTAGCCTTGGATTTCAAGCANGG	GTtGtgTTGt-aTTCAAGCAAGG	5	1401971	-	5	1
RNA	GTAGCCTTGGATTTCAAGCANGG	GTgGCCaTGG-TagCAAtCATGG	5	2409488	+	5	1
RNA	GTAGCCTTGGATTTCAAGCANGG	aTAGCCTTct-TaTCAAaCAAGG	5	4910808	+	5	1
RNA	GTAGCCTTGGATTTCAAGCANGG	GTAGCCTatG-gTgaAAGCAGGG	5	5376102	-	5	1
RNA	GTAGCCTTGGATTTCAAGCANGG	GTAGagTTGt-TgTCAAaCATGG	5	6086131	-	5	1
RNA	GTAGCCTTGGATTTCAAGCANGG	tTAtCCTTGG-TTTgtAGCtTGG	5	6869761	+	5	1
RNA	GTAGCCTTGGATTTCAAGCANGG	tTAtCCTTGG-TTTgtAGCtTGG	5	6884885	+	5	1
RNA	GTAGCCTTGGATTTCAAGCANGG	tTAGaCcTtG-TTTCAAGCtTGG	5	7861884	+	5	1
RNA	GTAGCCTTGGATTTCAAGCANGG	GTgGtCTTGG-gaTCAAGgAAGG	5	8071070	-	5	1
RNA	GTAGCCTTGGATTTCAAGCANGG	aaAGCCgaGG-TTTCtAGCATGG	5	10338758	+	5	1
RNA	GTAGCCTTGGATTTCAAGCANGG	tTAttaTTGG-TTTaAAGCATGG	5	10300000	-	5	1
RNA	GTAGCCTTGGATTTCAAGCANGG	GTAGtCggGG-TTTgAAcCACGG	5	10531586	-	5	1
RNA	GTAGCCTTGGATTTCAAGCANGG	tTAGgCTTGG-TTTaAAtaATGG	5	10398194	-	5	1
RNA	GTAGCCTTGGATTTCAAGCANGG	tTAGaCTTGG-TTTaAAtgATGG	5	12743090	-	5	1
RNA	GTAGCCTTGGATTTCAAGCANGG	tTAGaCTTGG-TTTaAAtgATGG	5	12805908	-	5	1
RNA	GTAGCCTTGGATTTCAAGCANGG	tTAGgCTTGG-TTTaAAtgATGG	5	12806244	-	5	1
RNA	GTAGCCTTGGATTTCAAGCANGG	GTgGCgTTtG-cTTCAAGgAAGG	5	13116438	-	5	1
RNA	GTAGCCTTGGATTTCAAGCANGG	aTtcCCTcGG-TTTCAAaCAAGG	5	15484893	+	5	1
RNA	GTAGCCTTGGATTTCAAGCANGG	cTAaCCaTGG-cTTtAAGCAGGG	5	15329556	-	5	1
RNA	GTAGCCTTGGATTTCAAGCANGG	GTAGatTTGa-TTTgAAtCAAGG	5	17407536	+	5	1
RNA	GTAGCCTTGGATTTCAAGCANGG	GTAGCaTTta-TTTCAAaaAAGG	5	17883286	+	5	1
RNA	GTAGCCTTGGATTTCAAGCANGG	cTAaCCaTGG-cTTtAAGCAGGG	5	18709180	+	5	1
RNA	GTAGCCTTGGATTTCAAGCANGG	GTAGgCTTGt-TTTgAAcaAAGG	5	21346550	-	5	1
RNA	GTAGCCTTGGATTTCAAGCANGG	GcAGCCTTta-aTTCAAGtAGGG	5	22215141	+	5	1
RNA	GTAGCCTTGGATTTCAAGCANGG	GgAagCTgGG-TaTCAAGCACGG	5	23110638	-	5	1
RNA	GTAGCCTTGGATTTCAAGCANGG	GTAGCaaTtG-TTcCtAGCATGG	5	23935858	+	5	1
RNA	GTAGCCTTGGATTTCAAGCANGG	tTAGtCTTGG-TTTCcAcaACGG	5	23744841	-	5	1
RNA	GTAGCCTTGGATTTCAAGCANGG	GTgGCCggGG-TTTgAAcCACGG	5	23918392	-	5	1
RNA	GTAGCCTTGGATTTCAAGCANGG	GaAttCTTGa-aTTCAAGCAAGG	5	26452044	+	5	1
RNA	GTAGCCTTGGATTTCAAGCANGG	GaAttCTTGa-aTTCAAGCAAGG	5	26439779	+	5	1
RNA	GTAGCCTTGGATTTCAAGCANGG	GcAGCtTTGc-TTagAAGCACGG	5	26517975	+	5	1
RNA	GTAGCCTTGGATTTCAAGCANGG	GTAagtTTGG-TTTCAttCAAGG	5	27247257	+	5	1
RNA	GTAGCCTTGGATTTCAAGCANGG	cTAtCCTTtc-TTTCtAGCATGG	5	28585327	+	5	1
RNA	GTAGCCTTGGATTTCAAGCANGG	caAGCaTTGG-TTTCAAatATGG	5	29957903	+	5	1
RNA	GTAGCCTTGGATTTCAAGCANGG	tcAaCCTTGG-TTTtAAGaATGG	5	32118119	-	5	1
RNA	GTAGCCTTGGATTTCAAGCANGG	tTcttCTaGG-TTTCAAGCACGG	5	33600114	+	5	1
RNA	GTAGCCTTGGATTTCAAGCANGG	tTAGgCTTGG-TTTaAAtaATGG	5	33371358	-	5	1
RNA	GTAGCCTTGGATTTCAAGCANGG	tTAaCCaTGG-TTTgAAGCtTGG	5	34295937	+	5	1
RNA	GTAGCCTTGGATTTCAAGCANGG	GTAGCCTgca-TTTCAAGtgGGG	5	34576517	+	5	1
RNA	GTAGCCTTGGATTTCAAGCANGG	aTAttCaTGG-TTTtAAGCATGG	5	34957838	+	5	1
RNA	GTAGCCTTGGATTTCAAGCANGG	GTAaCaaTaa-TTTCAAGCAAGG	5	35173290	-	5	1
RNA	GTAGCCTTGGATTTCAAGCANGG	GTAGCagcGG-TTcCtAGCATGG	5	35386947	-	5	1
RNA	GTAGCCTTGGATTTCAAGCANGG	aTAaCCaTGG-TTTCAAGtcTGG	5	36003531	+	5	1
RNA	GTAGCCTTGGATTTCAAGCANGG	GgAGCgTTGG-aTTgAAcCAGGG	5	37742332	+	5	1
RNA	GTAGCCTTGGATTTCAAGCANGG	GgAGCgTTGG-aTTgAAcCAGGG	5	37776414	+	5	1
RNA	GTAGCCTTGGATTTCAAGCANGG	GaAGaCTTGa-aTTgAAGCAAGG	5	41569858	-	5	1
RNA	GTAGCCTTGGATTTCAAGCANGG	GTAcCCTgaG-TggCAAGCAAGG	5	41627835	-	5	1
RNA	GTAGCCTTGGATTTCAAGCANGG	GTAGCCggGG-TTTgAAaCcCGG	5	42708306	+	5	1
RNA	GTAGCCTTGGATTTCAAGCANGG	GTgGCCgTGG-TTTgAAcCcCGG	5	42473940	-	5	1
RNA	GTAGCCTTGGATTTCAAGCANGG	tTAGCCTTGG-aTgCAgGtATGG	5	42497801	-	5	1
RNA	GTAGCCTTGGATTTCAAGCANGG	aTAGCCTTGG-caTCActCAAGG	5	43562126	+	5	1
RNA	GTAGCCTTGGATTTCAAGCANGG	cTAGCCTTaG-TTTCcAaCtTGG	8	3070320	+	5	1
RNA	GTAGCCTTGGATTTCAAGCANGG	GTtGaCaaGG-TTaCAAGCAAGG	8	2972546	-	5	1
RNA	GTAGCCTTGGATTTCAAGCANGG	actaCCTTtG-TTTCAAGCATGG	8	4260169	+	5	1
RNA	GTAGCCTTGGATTTCAAGCANGG	GcAatCTTGG-TTTCcAGaAAGG	8	5132636	-	5	1
RNA	GTAGCCTTGGATTTCAAGCANGG	GaAtCCTTGG-TTcgAAGCcTGG	8	9131905	+	5	1
RNA	GTAGCCTTGGATTTCAAGCANGG	GTAGaCaTGG-TTTCttGgAAGG	8	9677498	+	5	1
RNA	GTAGCCTTGGATTTCAAGCANGG	GTgGtCTaGa-TTTCAAGCtCGG	8	10558678	+	5	1
RNA	GTAGCCTTGGATTTCAAGCANGG	tTAGtCTTGG-TTTCcAcaACGG	8	11349985	+	5	1
RNA	GTAGCCTTGGATTTCAAGCANGG	GTAtCCTTtG-aTTCAcaCATGG	8	11270247	-	5	1
RNA	GTAGCCTTGGATTTCAAGCANGG	aTAGtCTTGG-gTTCAAGttAGG	8	11578164	-	5	1
RNA	GTAGCCTTGGATTTCAAGCANGG	GaAtCaTTGt-aTTCAAGCAGGG	8	13172165	-	5	1
RNA	GTAGCCTTGGATTTCAAGCANGG	GaAGCCaTGG-gTaCAAGaAAGG	8	15223264	-	5	1
RNA	GTAGCCTTGGATTTCAAGCANGG	GTtGCtTTGa-TaTCAAGCgTGG	8	16672709	-	5	1
RNA	GTAGCCTTGGATTTCAAGCANGG	GTtGgCTaGG-TTaCAgGCACGG	8	17618492	-	5	1
RNA	GTAGCCTTGGATTTCAAGCANGG	GccGCCTTGt-TTTCAActAGGG	8	18079606	+	5	1
RNA	GTAGCCTTGGATTTCAAGCANGG	GTAGCCgTtG-TcTgAgGCAAGG	8	21374776	+	5	1
RNA	GTAGCCTTGGATTTCAAGCANGG	tTAGtCTTGG-TTTCcAcaACGG	8	21944443	+	5	1
RNA	GTAGCCTTGGATTTCAAGCANGG	GTAaCCaTaG-TTTtAAtCATGG	8	24065710	+	5	1
RNA	GTAGCCTTGGATTTCAAGCANGG	aaAGCtTTGG-TTTttAGCAAGG	8	24060354	+	5	1
RNA	GTAGCCTTGGATTTCAAGCANGG	aTAcCCTTac-TTTgAAGCAGGG	8	28192303	-	5	1
RNA	GTAGCCTTGGATTTCAAGCANGG	tTAGtCTTGG-TTTCcAcaACGG	8	29326912	-	5	1
RNA	GTAGCCTTGGATTTCAAGCANGG	GgAGCCTTtG-cTTtAAaCATGG	8	30880895	-	5	1
RNA	GTAGCCTTGGATTTCAAGCANGG	GTAGCtTTac-TTTCAtGaAGGG	8	39741576	-	5	1
RNA	GTAGCCTTGGATTTCAAGCANGG	GTAGCaTcGt-TTTCAAaCgGGG	8	42333352	-	5	1
RNA	GTAGCCTTGGATTTCAAGCANGG	GaAGCCTTGG-aTaaAAGtAAGG	8	44450030	+	5	1
RNA	GTAGCCTTGGATTTCAAGCANGG	GTAGCCTgaG-TTgCAAatAAGG	8	44435607	+	5	1
RNA	GTAGCCTTGGATTTCAAGCANGG	cTAaCCaTGG-cTTtAAGCAGGG	8	45498004	-	5	1
RNA	GTAGCCTTGGATTTCAAGCANGG	GTAaCaTTtG-TTTCAAaCcCGG	2	1622458	-	5	1
RNA	GTAGCCTTGGATTTCAAGCANGG	GgAGCtTTGa-aTTgAAGCATGG	2	2212182	-	5	1
RNA	GTAGCCTTGGATTTCAAGCANGG	GcAGCCTTaa-aTTCAAGaAGGG	2	6245020	+	5	1
RNA	GTAGCCTTGGATTTCAAGCANGG	tgAGCCTTGt-TTTCAAGatAGG	2	6371438	-	5	1
RNA	GTAGCCTTGGATTTCAAGCANGG	GTAGtCTTGt-TgTgAAGtAAGG	2	6774235	+	5	1
RNA	GTAGCCTTGGATTTCAAGCANGG	tTAaCCTTGG-TTTtgAGaAAGG	2	7401323	+	5	1
RNA	GTAGCCTTGGATTTCAAGCANGG	GTAGgCTTGG-TTgaAcGaAAGG	2	9720604	-	5	1
RNA	GTAGCCTTGGATTTCAAGCANGG	GTAGCCgaGG-TTTaAAcCtCGG	2	13000731	-	5	1
RNA	GTAGCCTTGGATTTCAAGCANGG	GTAtCCaTGt-TTTgAAtCATGG	2	13532001	+	5	1
RNA	GTAGCCTTGGATTTCAAGCANGG	GTgGCCTTGG-TTTgcAtCgAGG	2	13854541	-	5	1
RNA	GTAGCCTTGGATTTCAAGCANGG	tTAaaaTTtG-TTTCAAGCAAGG	2	16262944	+	5	1
RNA	GTAGCCTTGGATTTCAAGCANGG	tTAGgCTTGG-TTTaAAtgATGG	2	16253861	-	5	1
RNA	GTAGCCTTGGATTTCAAGCANGG	aTgGggaTGG-TTTCAAGCAGGG	2	19403662	-	5	1
RNA	GTAGCCTTGGATTTCAAGCANGG	tTtcCCTTaG-TTTCAAtCAAGG	2	19809908	+	5	1
RNA	GTAGCCTTGGATTTCAAGCANGG	GTtGCCTTGG-TTTCttttATGG	2	20423714	+	5	1
RNA	GTAGCCTTGGATTTCAAGCANGG	tTAGgCTTGG-TTTaAAtgATGG	2	20148538	-	5	1
RNA	GTAGCCTTGGATTTCAAGCANGG	GTAGgCTTGt-TTTgAAcaAAGG	2	22835473	-	5	1
RNA	GTAGCCTTGGATTTCAAGCANGG	GTtGataTGG-TTTCAAGCtGGG	2	23692551	+	5	1
RNA	GTAGCCTTGGATTTCAAGCANGG	GTAtatTTGG-TTTCAttCAAGG	2	23855840	+	5	1
RNA	GTAGCCTTGGATTTCAAGCANGG	tTAGtCTTGG-TTTCcAcaACGG	2	24823474	+	5	1
RNA	GTAGCCTTGGATTTCAAGCANGG	GTAGgCgTGc-TTTgAAtCAGGG	2	25105085	-	5	1
RNA	GTAGCCTTGGATTTCAAGCANGG	GTAtaaTTGG-TTTCAttCAAGG	2	25986728	-	5	1
RNA	GTAGCCTTGGATTTCAAGCANGG	tTAGgCTTGG-TTTaAAtgATGG	2	29111543	-	5	1
RNA	GTAGCCTTGGATTTCAAGCANGG	GTAGCtTTtG-TTaaAAtCACGG	2	29509815	-	5	1
RNA	GTAGCCTTGGATTTCAAGCANGG	GTtGttTTGG-TTTCAgGaATGG	2	32999444	-	5	1
RNA	GTAGCCTTGGATTTCAAGCANGG	GTAttCTTaG-TTTCAAtgAAGG	2	34771921	-	5	1
RNA	GTAGCCTTGGATTTCAAGCANGG	GTtGttTTGG-TcTCAAGtATGG	2	38777502	+	5	1
RNA	GTAGCCTTGGATTTCAAGCANGG	GcAGCCTTaG-TTcCAtcCACGG	2	39298876	+	5	1
RNA	GTAGCCTTGGATTTCAAGCANGG	cgAaCCTTGG-TcaCAAGCAAGG	2	39300058	-	5	1
RNA	GTAGCCTTGGATTTCAAGCANGG	GTAGgtTTGt-TTTCgAaCATGG	2	40255994	-	5	1
RNA	GTAGCCTTGGATTTCAAGCANGG	GTAtCtTTGG-gggCAAGCAAGG	2	43079989	-	5	1
RNA	GTAGCCTTGGATTTCAAGCANGG	GTAatCcTGa-TaTCAAGCATGG	7	62739	+	5	1
RNA	GTAGCCTTGGATTTCAAGCANGG	tTAGtCTTGG-TTTCcAcaACGG	7	822771	-	5	1
RNA	GTAGCCTTGGATTTCAAGCANGG	tTAGgCTTGG-TTTaAAtgATGG	7	1642369	+	5	1
RNA	GTAGCCTTGGATTTCAAGCANGG	GTtGCCTaaG-TTTgAAGCtTGG	7	1429201	-	5	1
RNA	GTAGCCTTGGATTTCAAGCANGG	GTtGCtTTGt-TTTtAAGtAGGG	7	4480233	-	5	1
RNA	GTAGCCTTGGATTTCAAGCANGG	aaAGgCTTGG-TTTCtAGCtGGG	7	5052257	-	5	1
RNA	GTAGCCTTGGATTTCAAGCANGG	GgAGCtTTGG-TTcCAActATGG	7	7481985	+	5	1
RNA	GTAGCCTTGGATTTCAAGCANGG	aTAGCCaTGG-TTTCcctCACGG	7	7965308	+	5	1
RNA	GTAGCCTTGGATTTCAAGCANGG	GTAGCaTTGG-TTggAAcCgTGG	7	8405005	-	5	1
RNA	GTAGCCTTGGATTTCAAGCANGG	tTAGtCTTGG-TTTCcAcaACGG	7	8714700	-	5	1
RNA	GTAGCCTTGGATTTCAAGCANGG	GTgtCtTTGG-TTTCcAaCACGG	7	9883547	-	5	1
RNA	GTAGCCTTGGATTTCAAGCANGG	tTgGCCaTGG-TTTCAAaCtTGG	7	12387191	-	5	1
RNA	GTAGCCTTGGATTTCAAGCANGG	GgcGCCgTcG-TTTCAcGCACGG	7	13159803	-	5	1
RNA	GTAGCCTTGGATTTCAAGCANGG	tTAGgCTTGG-TTTaAAtgATGG	7	15337682	+	5	1
RNA	GTAGCCTTGGATTTCAAGCANGG	GTtGCCgTtG-TTTgAgGCAAGG	7	16451141	+	5	1
RNA	GTAGCCTTGGATTTCAAGCANGG	GgAagCaTGa-TTTCAAGCAAGG	7	17140417	-	5	1
RNA	GTAGCCTTGGATTTCAAGCANGG	GTAagtTTGG-TTTCAttCAAGG	7	19707206	-	5	1
RNA	GTAGCCTTGGATTTCAAGCANGG	GTgGCCgaGG-TTTaAAcCACGG	7	19988687	+	5	1
RNA	GTAGCCTTGGATTTCAAGCANGG	tTAGgCTTGG-TTTaAAtgATGG	7	21614562	+	5	1
RNA	GTAGCCTTGGATTTCAAGCANGG	GTAtCaTTGG-TTTgtAGCtTGG	7	22150033	+	5	1
RNA	GTAGCCTTGGATTTCAAGCANGG	cTAGgtTTGG-TTTtAAaCAGGG	7	22547091	+	5	1
RNA	GTAGCCTTGGATTTCAAGCANGG	tTAtCaTaGG-TTTCAtGCATGG	7	25632633	+	5	1
RNA	GTAGCCTTGGATTTCAAGCANGG	GTAGCaTTGG-TTTCcAtgcAGG	7	27922265	+	5	1
RNA	GTAGCCTTGGATTTCAAGCANGG	GTAGCCTTtG-TTTggAcaATGG	7	29057335	+	5	1
RNA	GTAGCCTTGGATTTCAAGCANGG	tTtGtCTTGG-TgTaAAGCAAGG	7	30322995	+	5	1
RNA	GTAGCCTTGGATTTCAAGCANGG	GTAaCCaaGG-gTTCcAGCAGGG	7	30285594	-	5	1
RNA	GTAGCCTTGGATTTCAAGCANGG	GaAtaCaTGG-TTTCAAcCAAGG	7	31723841	+	5	1
RNA	GTAGCCTTGGATTTCAAGCANGG	GTAGaCTTGG-aTTCAgaCtCGG	7	33523384	+	5	1
RNA	GTAGCCTTGGATTTCAAGCANGG	GTAatCaTac-TTTCAAGCATGG	7	35408517	-	5	1
RNA	GTAGCCTTGGATTTCAAGCANGG	GTgGCCggGG-TTTCAAcCtCGG	7	38326848	+	5	1
RNA	GTAGCCTTGGATTTCAAGCANGG	GTAGCCTTtG-acTCcAcCAAGG	7	41295557	+	5	1
RNA	GTAGCCTTGGATTTCAAGCANGG	cTAGCtaTGG-TTTCAtGgAAGG	7	43268319	+	5	1
RNA	GTAGCCTTGGATTTCAAGCANGG	tcAGCCTTaG-TTTCcAaCACGG	7	45192252	-	5	1
RNA	GTAGCCTTGGATTTCAAGCANGG	GTAGCtgTGt-TTTCAtGCcTGG	7	48416649	+	5	1
RNA	GTAGCCTTGGATTTCAAGCANGG	GTtGtgTTGG-TTTCAAatAAGG	7	48054904	-	5	1
RNA	GTAGCCTTGGATTTCAAGCANGG	GgAaCCTTGG-TTTaAAaaAGGG	1	1310337	-	5	1
RNA	GTAGCCTTGGATTTCAAGCANGG	GaAGCaTTGG-cTTCAcGCtAGG	1	2598479	-	5	1
RNA	GTAGCCTTGGATTTCAAGCANGG	GTtGCtTgGc-TTTCAAGaAGGG	1	4358859	-	5	1
RNA	GTAGCCTTGGATTTCAAGCANGG	tTAGgCTTGG-TTTaAAtgATGG	1	5765606	-	5	1
RNA	GTAGCCTTGGATTTCAAGCANGG	GTcGCtTgGG-TTTgAAcCACGG	1	10654439	+	5	1
RNA	GTAGCCTTGGATTTCAAGCANGG	GTAtCaTTGG-TTTgtAGCtTGG	1	10958129	+	5	1
RNA	GTAGCCTTGGATTTCAAGCANGG	GTAtCaTTGG-TTTgtAGCtTGG	1	10938937	+	5	1
RNA	GTAGCCTTGGATTTCAAGCANGG	GTAtCaTTGG-TTTgtAGCtTGG	1	10973353	+	5	1
RNA	GTAGCCTTGGATTTCAAGCANGG	cTAaCtTTtG-TTTCAAGCgAGG	1	11605260	+	5	1
RNA	GTAGCCTTGGATTTCAAGCANGG	GTAGaCaTGG-TTTCActCtTGG	1	13860061	-	5	1
RNA	GTAGCCTTGGATTTCAAGCANGG	tTAGgCTTGG-TTTaAAtgATGG	1	16097869	+	5	1
RNA	GTAGCCTTGGATTTCAAGCANGG	GTgtCCgTGG-TTcCAtGCAAGG	1	18129282	+	5	1
RNA	GTAGCCTTGGATTTCAAGCANGG	aTtGCaTTGG-TTgCAAaCACGG	1	19143028	-	5	1
RNA	GTAGCCTTGGATTTCAAGCANGG	aTtGCaTTGG-TTgCAAaCACGG	1	19093532	-	5	1
RNA	GTAGCCTTGGATTTCAAGCANGG	GcAGCCccGa-gTTCAAGCAGGG	1	19887653	+	5	1
RNA	GTAGCCTTGGATTTCAAGCANGG	aTAGCtTTtG-TTTCAAcaAGGG	1	21297517	+	5	1
RNA	GTAGCCTTGGATTTCAAGCANGG	GTActCTTGG-aTTCgAGgAAGG	1	21335178	+	5	1
RNA	GTAGCCTTGGATTTCAAGCANGG	GagGCCTTGG-TTTgAAtaATGG	1	22099950	+	5	1
RNA	GTAGCCTTGGATTTCAAGCANGG	tTAtCaaaGG-TTTCAAGCAGGG	1	22951408	-	5	1
RNA	GTAGCCTTGGATTTCAAGCANGG	tTAaCCaTGG-TTTgAAGCtTGG	1	24486065	-	5	1
RNA	GTAGCCTTGGATTTCAAGCANGG	tTAaCCaTGG-TTTgAAGCtTGG	1	24494399	-	5	1
RNA	GTAGCCTTGGATTTCAAGCANGG	GTAcCCTatt-TTTCAAGCtGGG	1	26348096	-	5	1
RNA	GTAGCCTTGGATTTCAAGCANGG	GaAGtCaTGG-TTTCcAGCtAGG	1	26498633	-	5	1
RNA	GTAGCCTTGGATTTCAAGCANGG	GTAGagTTGt-TaTCAAaCATGG	1	27643723	+	5	1
RNA	GTAGCCTTGGATTTCAAGCANGG	tTAGtCTTGt-TaTCtAGCAAGG	1	28832795	+	5	1
RNA	GTAGCCTTGGATTTCAAGCANGG	GTgGaCTTGG-TTTCgAagACGG	1	29092485	-	5	1
RNA	GTAGCCTTGGATTTCAAGCANGG	GTAGCCgaGG-TTTgAAcCcCGG	1	29739383	-	5	1
RNA	GTAGCCTTGGATTTCAAGCANGG	GTAtCaTTGG-TagCcAGCAGGG	1	30820428	-	5	1
RNA	GTAGCCTTGGATTTCAAGCANGG	GTAGCtTTcG-TTaaAAtCAAGG	1	33313381	-	5	1
RNA	GTAGCCTTGGATTTCAAGCANGG	cTctCCTcGG-TTTCAAaCAAGG	1	35898757	+	5	1
RNA	GTAGCCTTGGATTTCAAGCANGG	tTctCCTTGc-TTTCAAaCAAGG	1	37593035	-	5	1
RNA	GTAGCCTTGGATTTCAAGCANGG	tTAGgCTTGG-TTTaAAtgATGG	1	37778484	-	5	1
RNA	GTAGCCTTGGATTTCAAGCANGG	cTAGaCaTGG-TaTgAAGCACGG	1	40181837	+	5	1
RNA	GTAGCCTTGGATTTCAAGCANGG	GTAGtaTTGG-TTTtAAGggAGG	1	40327633	+	5	1
RNA	GTAGCCTTGGATTTCAAGCANGG	GaAtCCTTGG-TaTttAGCAAGG	1	42352715	+	5	1
RNA	GTAGCCTTGGATTTCAAGCANGG	tTAGCCaTGt-aTaCAAGCAAGG	1	46213075	-	5	1
RNA	GTAGCCTTGGATTTCAAGCANGG	tTAGCCTTGa-TTTgAAagAAGG	1	50475281	+	5	1
RNA	GTAGCCTTGGATTTCAAGCANGG	GcgaCCTTGt-TTTgAAGCAAGG	3	98241	-	5	1
RNA	GTAGCCTTGGATTTCAAGCANGG	aTAGCaaTGG-TTcCtAGCATGG	3	1154609	-	5	1
RNA	GTAGCCTTGGATTTCAAGCANGG	agAtCCTTGG-TTTCtAGaAGGG	3	1825635	-	5	1
RNA	GTAGCCTTGGATTTCAAGCANGG	GaAGCtTTGc-TTgCAAGgAAGG	3	2057629	-	5	1
RNA	GTAGCCTTGGATTTCAAGCANGG	GTgGCCTaGG-TTTgAAcCcCGG	3	2445559	-	5	1
RNA	GTAGCCTTGGATTTCAAGCANGG	GTAtaCTTGG-TTTtgAtCAAGG	3	3310925	+	5	1
RNA	GTAGCCTTGGATTTCAAGCANGG	aTAtCCTTGG-aTTgAAaCAAGG	3	3913976	-	5	1
RNA	GTAGCCTTGGATTTCAAGCANGG	tTAGtCTTGG-TTTCcAcaACGG	3	4367491	-	5	1
RNA	GTAGCCTTGGATTTCAAGCANGG	cTAaCCaTGG-cTTtAAGCAGGG	3	5151141	-	5	1
RNA	GTAGCCTTGGATTTCAAGCANGG	GggGggTTGG-TTTCgAGCAAGG	3	5859015	-	5	1
RNA	GTAGCCTTGGATTTCAAGCANGG	tTAGgCTTGG-TTTaAAtgATGG	3	6464124	+	5	1
RNA	GTAGCCTTGGATTTCAAGCANGG	GctGCCTTGa-TTTgAAGgATGG	3	6722563	+	5	1
RNA	GTAGCCTTGGATTTCAAGCANGG	tTAGgCTTGG-TTTaAAtgATGG	3	6754621	-	5	1
RNA	GTAGCCTTGGATTTCAAGCANGG	GTtGCgTTGG-TTTCAgttAGGG	3	7523637	-	5	1
RNA	GTAGCCTTGGATTTCAAGCANGG	tTAGCaTTtG-TTTCAAaCtAGG	3	7616752	-	5	1
RNA	GTAGCCTTGGATTTCAAGCANGG	GTAaatTTGG-TTTCAttCAAGG	3	12223320	+	5	1
RNA	GTAGCCTTGGATTTCAAGCANGG	GTAtCCTgGG-TTTCAgagAAGG	3	13077272	+	5	1
RNA	GTAGCCTTGGATTTCAAGCANGG	tTAcCtTTGt-TTTCAAcCATGG	3	13961068	+	5	1
RNA	GTAGCCTTGGATTTCAAGCANGG	tTAGtCTTGG-TTTCcAcaACGG	3	14974839	+	5	1
RNA	GTAGCCTTGGATTTCAAGCANGG	tTAcCtTTGt-TTTCAAcCATGG	3	15383635	-	5	1
RNA	GTAGCCTTGGATTTCAAGCANGG	GTAtCaaTGc-TTTCAgGCACGG	3	16040825	+	5	1
RNA	GTAGCCTTGGATTTCAAGCANGG	GTAGCCTaca-TaTCAAGCtTGG	3	17268540	+	5	1
RNA	GTAGCCTTGGATTTCAAGCANGG	tTAGgCTTGG-TTTaAAtgATGG	3	18441161	-	5	1
RNA	GTAGCCTTGGATTTCAAGCANGG	GTgGCCgaGG-TTTgAAtCATGG	3	18870717	+	5	1
RNA	GTAGCCTTGGATTTCAAGCANGG	tTAGtCTTGG-TTTCcAcaACGG	3	18981303	+	5	1
RNA	GTAGCCTTGGATTTCAAGCANGG	tTAGgCTTGG-TTTaAAtgATGG	3	19486235	-	5	1
RNA	GTAGCCTTGGATTTCAAGCANGG	aaAGCtTTGG-TTTttAGCAAGG	3	22013802	+	5	1
RNA	GTAGCCTTGGATTTCAAGCANGG	aaAGCtTTGG-TTTttAGCAAGG	3	22006285	+	5	1
RNA	GTAGCCTTGGATTTCAAGCANGG	GTAGCtTTcG-TaTCAAGttTGG	3	24687926	-	5	1
RNA	GTAGCCTTGGATTTCAAGCANGG	GctGCCTTGt-TTggAAGCAAGG	3	25817872	+	5	1
RNA	GTAGCCTTGGATTTCAAGCANGG	GTtGtCcTGG-TgTCAAGCtTGG	3	26411322	+	5	1
RNA	GTAGCCTTGGATTTCAAGCANGG	GTAcCaTTGG-gTaCAAaCATGG	3	26361867	-	5	1
RNA	GTAGCCTTGGATTTCAAGCANGG	aTAagCTTGG-TTcCAAGCtAGG	3	27290738	-	5	1
RNA	GTAGCCTTGGATTTCAAGCANGG	GTAtatTTGG-TTTCAActAGGG	3	27641677	+	5	1
RNA	GTAGCCTTGGATTTCAAGCANGG	GTAGaCTTGG-TgTtgAGaAAGG	3	31792502	-	5	1
RNA	GTAGCCTTGGATTTCAAGCANGG	cTtGCCTTGt-TaTCAAGaATGG	3	33998239	+	5	1
RNA	GTAGCCTTGGATTTCAAGCANGG	GaAGtCcTGG-gTTCAAaCACGG	3	33965770	-	5	1
RNA	GTAGCCTTGGATTTCAAGCANGG	cTgGCtTcaG-TTTCAAGCAAGG	3	34033787	-	5	1
RNA	GTAGCCTTGGATTTCAAGCANGG	GTAcaCTTGG-TTTtttGCATGG	3	34489683	-	5	1
RNA	GTAGCCTTGGATTTCAAGCANGG	tTAGtCaTGG-TTTgAAtCAAGG	3	34662631	-	5	1
RNA	GTAGCCTTGGATTTCAAGCANGG	GTAGCaTTGG-TTggAAcCgTGG	3	35846414	-	5	1
RNA	GTAGCCTTGGATTTCAAGCANGG	tTtGttTTGG-TTTgAAGCACGG	3	37379270	-	5	1
RNA	GTAGCCTTGGATTTCAAGCANGG	GTAcatTTtG-TTTtAAGCAGGG	3	40710348	+	5	1
RNA	GTAGCCTTGGATTTCAAGCANGG	acgGCCTTGG-aTTCAAGtAAGG	3	41356068	+	5	1
RNA	GTAGCCTTGGATTTCAAGCANGG	GcAGCCTTtG-TgTCAAGggAGG	3	42745464	+	5	1
RNA	GTAGCCTTGGATTTCAAGCANGG	tTAaCCTTac-TTTCAAGCtAGG	3	42916065	+	5	1
RNA	GTAGCCTTGGATTTCAAGCANGG	GTAGaCcTtG-TTcCAAGCtTGG	3	43246405	-	5	1
RNA	GTAGCCTTGGATTTCAAGCANGG	GTcGtCaTGG-TTTgAAcCACGG	3	43499924	-	5	1
RNA	GTAGCCTTGGATTTCAAGCANGG	GTAtgtTTGG-TTTtAAGtATGG	3	44489563	-	5	1
RNA	GTAGCCTTGGATTTCAAGCANGG	GTAGttTTGt-TTTaAAGgAAGG	3	50499659	+	5	1
RNA	GTAGCCTTGGATTTCAAGCANGG	GTAGCCTaGG-TcTtgAGCtTGG	3	50953078	+	5	1
RNA	GTAGCCTTGGATTTCAAGCANGG	GgAtCCTTct-TTcCAAGCAAGG	3	52335212	+	5	1
RNA	GTAGCCTTGGATTTCAAGCANGG	GaAGCacgGG-TTTgAAGCACGG	4	740305	-	5	1
RNA	GTAGCCTTGGATTTCAAGCANGG	GgAGtCTTGc-TgTCAAGaATGG	4	1335301	+	5	1
RNA	GTAGCCTTGGATTTCAAGCANGG	tTAGtCTTGG-TTTCcAcaACGG	4	3373419	-	5	1
RNA	GTAGCCTTGGATTTCAAGCANGG	tTAGaCTTGG-TTTaAAtgATGG	4	3393704	-	5	1
RNA	GTAGCCTTGGATTTCAAGCANGG	aTAGtCTTGG-gTTCAAGttTGG	4	3714734	+	5	1
RNA	GTAGCCTTGGATTTCAAGCANGG	GTAcCtTTGG-TTTatAtCAAGG	4	4723812	+	5	1
RNA	GTAGCCTTGGATTTCAAGCANGG	GcAGCCTTGG-gTTtttGCATGG	4	5128680	+	5	1
RNA	GTAGCCTTGGATTTCAAGCANGG	tTAtCCTTGG-TTTgtAGCtTGG	4	5493391	+	5	1
RNA	GTAGCCTTGGATTTCAAGCANGG	GTAGCCTTcG-TTcgAcGaAAGG	4	7426499	-	5	1
RNA	GTAGCCTTGGATTTCAAGCANGG	GTgGCCgTGG-TTTgAAagAAGG	4	8502838	+	5	1
RNA	GTAGCCTTGGATTTCAAGCANGG	GaAGCa-aGaATTcCAAGCACGG	scaffold1541	1575	+	5	1
RNA	GTAGCCTTGGATTTCAAGCANGG	GaAGCaa-GaATTcCAAGCACGG	scaffold1541	1575	+	5	1
RNA	GTAGCCTTGGATTTCAAGCANGG	GTAcCC-ctGAcTTCAcGCAGGG	scaffold0890	1874	+	5	1
RNA	GTAGCCTTGGATTTCAAGCANGG	GTAcCCc-tGAcTTCAcGCAGGG	scaffold0890	1874	+	5	1
RNA	GTAGCCTTGGATTTCAAGCANGG	GTAtCC-TGGAcaTCcAaCACGG	scaffold0893	3724	+	5	1
RNA	GTAGCCTTGGATTTCAAGCANGG	GTAtCCT-GGAcaTCcAaCACGG	scaffold0893	3724	+	5	1
RNA	GTAGCCTTGGATTTCAAGCANGG	GTAGCC-gGGAgTcgAcGCATGG	scaffold0614	7168	-	5	1
RNA	GTAGCCTTGGATTTCAAGCANGG	GTAGCCg-GGAgTcgAcGCATGG	scaffold0614	7168	-	5	1
RNA	GTAGCCTTGGATTTCAAGCANGG	GctGCC-cGGAgTTCAAaCAAGG	scaffold0526	3614	+	5	1
RNA	GTAGCCTTGGATTTCAAGCANGG	GctGCCc-GGAgTTCAAaCAAGG	scaffold0526	3614	+	5	1
RNA	GTAGCCTTGGATTTCAAGCANGG	GTgGCC-gGGATTTgAAcCcCGG	scaffold0524	1280	-	5	1
RNA	GTAGCCTTGGATTTCAAGCANGG	GTgGCCg-GGATTTgAAcCcCGG	scaffold0524	1280	-	5	1
RNA	GTAGCCTTGGATTTCAAGCANGG	GaAagC-acGATTTCAAGCAAGG	scaffold0502	12083	+	5	1
RNA	GTAGCCTTGGATTTCAAGCANGG	GaAagCa-cGATTTCAAGCAAGG	scaffold0502	12083	+	5	1
RNA	GTAGCCTTGGATTTCAAGCANGG	GTAtCC-TGcATgTCtAtCATGG	scaffold0510	9502	-	5	1
RNA	GTAGCCTTGGATTTCAAGCANGG	GTAtCCT-GcATgTCtAtCATGG	scaffold0510	9502	-	5	1
RNA	GTAGCCTTGGATTTCAAGCANGG	aTAGgC-TGaATTTCcAaCAAGG	scaffold0499	11883	-	5	1
RNA	GTAGCCTTGGATTTCAAGCANGG	aTAGgCT-GaATTTCcAaCAAGG	scaffold0499	11883	-	5	1
RNA	GTAGCCTTGGATTTCAAGCANGG	GTtGCC-cGGATTTCAttCtTGG	scaffold0267	24372	+	5	1
RNA	GTAGCCTTGGATTTCAAGCANGG	GTtGCCc-GGATTTCAttCtTGG	scaffold0267	24372	+	5	1
RNA	GTAGCCTTGGATTTCAAGCANGG	GTAGCC-TtcATTTgAAatATGG	scaffold0156	19564	+	5	1
RNA	GTAGCCTTGGATTTCAAGCANGG	GTAGCCT-tcATTTgAAatATGG	scaffold0156	19564	+	5	1
RNA	GTAGCCTTGGATTTCAAGCANGG	GTAGaC-TGGtTTTgAAcaAAGG	scaffold0073	41965	-	5	1
RNA	GTAGCCTTGGATTTCAAGCANGG	GTAGaCT-GGtTTTgAAcaAAGG	scaffold0073	41965	-	5	1
RNA	GTAGCCTTGGATTTCAAGCANGG	tTAGCa-TatATTTCAAGaATGG	scaffold0042	9802	+	5	1
RNA	GTAGCCTTGGATTTCAAGCANGG	tTAGCaT-atATTTCAAGaATGG	scaffold0042	9802	+	5	1
RNA	GTAGCCTTGGATTTCAAGCANGG	GaAagC-acGATTTCAAGCAAGG	scaffold0004	357670	+	5	1
RNA	GTAGCCTTGGATTTCAAGCANGG	GaAagCa-cGATTTCAAGCAAGG	scaffold0004	357670	+	5	1
RNA	GTAGCCTTGGATTTCAAGCANGG	GTgGtC-gGGATTTgAAtCATGG	6	3242542	-	5	1
RNA	GTAGCCTTGGATTTCAAGCANGG	GTgGtCg-GGATTTgAAtCATGG	6	3242542	-	5	1
RNA	GTAGCCTTGGATTTCAAGCANGG	GTAGCC-gGGgTTTgAAcCcCGG	6	3863265	+	5	1
RNA	GTAGCCTTGGATTTCAAGCANGG	GTAGCCg-GGgTTTgAAcCcCGG	6	3863265	+	5	1
RNA	GTAGCCTTGGATTTCAAGCANGG	GTAGCg-TGGATTagAgGtATGG	6	6207739	+	5	1
RNA	GTAGCCTTGGATTTCAAGCANGG	GTAGCgT-GGATTagAgGtATGG	6	6207739	+	5	1
RNA	GTAGCCTTGGATTTCAAGCANGG	aTgGCC-TtGtTTTgAAGCAAGG	6	10237144	+	5	1
RNA	GTAGCCTTGGATTTCAAGCANGG	aTgGCCT-tGtTTTgAAGCAAGG	6	10237144	+	5	1
RNA	GTAGCCTTGGATTTCAAGCANGG	GTAtCC-TcGATcgaAAGCATGG	6	14207777	-	5	1
RNA	GTAGCCTTGGATTTCAAGCANGG	GTAtCCT-cGATcgaAAGCATGG	6	14207777	-	5	1
RNA	GTAGCCTTGGATTTCAAGCANGG	cTAGCC-TGGtTTTCtgtCATGG	6	17333615	-	5	1
RNA	GTAGCCTTGGATTTCAAGCANGG	cTAGCCT-GGtTTTCtgtCATGG	6	17333615	-	5	1
RNA	GTAGCCTTGGATTTCAAGCANGG	GTgGCC-gGGgTTTgAAcCACGG	6	18987108	+	5	1
RNA	GTAGCCTTGGATTTCAAGCANGG	GTgGCCg-GGgTTTgAAcCACGG	6	18987108	+	5	1
RNA	GTAGCCTTGGATTTCAAGCANGG	aTAGCg-atGATTTCAAGgATGG	6	21768323	+	5	1
RNA	GTAGCCTTGGATTTCAAGCANGG	aTAGCga-tGATTTCAAGgATGG	6	21768323	+	5	1
RNA	GTAGCCTTGGATTTCAAGCANGG	cTAtCt-TGtATTTCgAGCAAGG	6	26057956	+	5	1
RNA	GTAGCCTTGGATTTCAAGCANGG	cTAtCtT-GtATTTCgAGCAAGG	6	26057956	+	5	1
RNA	GTAGCCTTGGATTTCAAGCANGG	cTAtCt-TGtATTTCgAGCAAGG	6	26077926	+	5	1
RNA	GTAGCCTTGGATTTCAAGCANGG	cTAtCtT-GtATTTCgAGCAAGG	6	26077926	+	5	1
RNA	GTAGCCTTGGATTTCAAGCANGG	cTAtCt-TGtATTTCgAGCAAGG	6	26144904	+	5	1
RNA	GTAGCCTTGGATTTCAAGCANGG	cTAtCtT-GtATTTCgAGCAAGG	6	26144904	+	5	1
RNA	GTAGCCTTGGATTTCAAGCANGG	tTAGCt-TtGATaaCAAGCAGGG	6	31409065	+	5	1
RNA	GTAGCCTTGGATTTCAAGCANGG	tTAGCtT-tGATaaCAAGCAGGG	6	31409065	+	5	1
RNA	GTAGCCTTGGATTTCAAGCANGG	GTgcCC-TGGAaTTCAActAGGG	6	31950477	-	5	1
RNA	GTAGCCTTGGATTTCAAGCANGG	GTgcCCT-GGAaTTCAActAGGG	6	31950477	-	5	1
RNA	GTAGCCTTGGATTTCAAGCANGG	aTAGCt-TaaATTTCcAGCATGG	5	913230	-	5	1
RNA	GTAGCCTTGGATTTCAAGCANGG	aTAGCtT-aaATTTCcAGCATGG	5	913230	-	5	1
RNA	GTAGCCTTGGATTTCAAGCANGG	GTgcCt-TGcATTTgAAGCATGG	5	2472022	+	5	1
RNA	GTAGCCTTGGATTTCAAGCANGG	GTgcCtT-GcATTTgAAGCATGG	5	2472022	+	5	1
RNA	GTAGCCTTGGATTTCAAGCANGG	GTAGCg-TGaAaTTtAAGgAAGG	5	2312687	-	5	1
RNA	GTAGCCTTGGATTTCAAGCANGG	GTAGCgT-GaAaTTtAAGgAAGG	5	2312687	-	5	1
RNA	GTAGCCTTGGATTTCAAGCANGG	GTgGCC-gGGATTTgAAcCcCGG	5	3445239	+	5	1
RNA	GTAGCCTTGGATTTCAAGCANGG	GTgGCCg-GGATTTgAAcCcCGG	5	3445239	+	5	1
RNA	GTAGCCTTGGATTTCAAGCANGG	GTAGtC-gGGgTTTgAAcCACGG	5	10531586	-	5	1
RNA	GTAGCCTTGGATTTCAAGCANGG	GTAGtCg-GGgTTTgAAcCACGG	5	10531586	-	5	1
RNA	GTAGCCTTGGATTTCAAGCANGG	cTtGCC-TGGATTTCtAGgtAGG	5	12938353	-	5	1
RNA	GTAGCCTTGGATTTCAAGCANGG	cTtGCCT-GGATTTCtAGgtAGG	5	12938353	-	5	1
RNA	GTAGCCTTGGATTTCAAGCANGG	catGCC-TGGATaTCAtGCAGGG	5	13507234	+	5	1
RNA	GTAGCCTTGGATTTCAAGCANGG	catGCCT-GGATaTCAtGCAGGG	5	13507234	+	5	1
RNA	GTAGCCTTGGATTTCAAGCANGG	GcAtCC-TGGATTTggAGaAAGG	5	13646568	+	5	1
RNA	GTAGCCTTGGATTTCAAGCANGG	GcAtCCT-GGATTTggAGaAAGG	5	13646568	+	5	1
RNA	GTAGCCTTGGATTTCAAGCANGG	GTAGtg-TGttTTTaAAGCAAGG	5	16219260	-	5	1
RNA	GTAGCCTTGGATTTCAAGCANGG	GTAGtgT-GttTTTaAAGCAAGG	5	16219260	-	5	1
RNA	GTAGCCTTGGATTTCAAGCANGG	GTAGat-TtGATTTgAAtCAAGG	5	17407536	+	5	1
RNA	GTAGCCTTGGATTTCAAGCANGG	GTAGatT-tGATTTgAAtCAAGG	5	17407536	+	5	1
RNA	GTAGCCTTGGATTTCAAGCANGG	GTAGCa-TttATTTCAAaaAAGG	5	17883286	+	5	1
RNA	GTAGCCTTGGATTTCAAGCANGG	GTAGCaT-ttATTTCAAaaAAGG	5	17883286	+	5	1
RNA	GTAGCCTTGGATTTCAAGCANGG	GTgcaa-TGGATTaCAAGCAAGG	5	17891000	-	5	1
RNA	GTAGCCTTGGATTTCAAGCANGG	GTgcaaT-GGATTaCAAGCAAGG	5	17891000	-	5	1
RNA	GTAGCCTTGGATTTCAAGCANGG	tTAGCC-gGcATTTtAAaCAAGG	5	20113166	-	5	1
RNA	GTAGCCTTGGATTTCAAGCANGG	tTAGCCg-GcATTTtAAaCAAGG	5	20113166	-	5	1
RNA	GTAGCCTTGGATTTCAAGCANGG	GTAtgC-TGaATTTCcAaCAAGG	5	21733590	+	5	1
RNA	GTAGCCTTGGATTTCAAGCANGG	GTAtgCT-GaATTTCcAaCAAGG	5	21733590	+	5	1
RNA	GTAGCCTTGGATTTCAAGCANGG	GTAGCC-TcGAcTgCAAaCtAGG	5	22207190	+	5	1
RNA	GTAGCCTTGGATTTCAAGCANGG	GTAGCCT-cGAcTgCAAaCtAGG	5	22207190	+	5	1
RNA	GTAGCCTTGGATTTCAAGCANGG	GcAGCC-TttAaTTCAAGtAGGG	5	22215141	+	5	1
RNA	GTAGCCTTGGATTTCAAGCANGG	GcAGCCT-ttAaTTCAAGtAGGG	5	22215141	+	5	1
RNA	GTAGCCTTGGATTTCAAGCANGG	GgAagC-TGGgTaTCAAGCACGG	5	23110638	-	5	1
RNA	GTAGCCTTGGATTTCAAGCANGG	GgAagCT-GGgTaTCAAGCACGG	5	23110638	-	5	1
RNA	GTAGCCTTGGATTTCAAGCANGG	GTgGCC-gGGgTTTgAAcCACGG	5	23918392	-	5	1
RNA	GTAGCCTTGGATTTCAAGCANGG	GTgGCCg-GGgTTTgAAcCACGG	5	23918392	-	5	1
RNA	GTAGCCTTGGATTTCAAGCANGG	GatGgg-TGGATTTCAAGCgTGG	5	24527862	+	5	1
RNA	GTAGCCTTGGATTTCAAGCANGG	GatGggT-GGATTTCAAGCgTGG	5	24527862	+	5	1
RNA	GTAGCCTTGGATTTCAAGCANGG	GTAGCC-TtGgTTctgAGCAAGG	5	24408604	-	5	1
RNA	GTAGCCTTGGATTTCAAGCANGG	GTAGCCT-tGgTTctgAGCAAGG	5	24408604	-	5	1
RNA	GTAGCCTTGGATTTCAAGCANGG	GTgGCC-gGGATTTgAAcCcCGG	5	26223594	+	5	1
RNA	GTAGCCTTGGATTTCAAGCANGG	GTgGCCg-GGATTTgAAcCcCGG	5	26223594	+	5	1
RNA	GTAGCCTTGGATTTCAAGCANGG	GaAttC-TtGAaTTCAAGCAAGG	5	26439779	+	5	1
RNA	GTAGCCTTGGATTTCAAGCANGG	GaAttCT-tGAaTTCAAGCAAGG	5	26439779	+	5	1
RNA	GTAGCCTTGGATTTCAAGCANGG	GaAttC-TtGAaTTCAAGCAAGG	5	26452044	+	5	1
RNA	GTAGCCTTGGATTTCAAGCANGG	GaAttCT-tGAaTTCAAGCAAGG	5	26452044	+	5	1
RNA	GTAGCCTTGGATTTCAAGCANGG	GTctaC-aGGATTTCAAGtATGG	5	28674269	-	5	1
RNA	GTAGCCTTGGATTTCAAGCANGG	GTctaCa-GGATTTCAAGtATGG	5	28674269	-	5	1
RNA	GTAGCCTTGGATTTCAAGCANGG	GcAGCC-caGATTgCAAtCATGG	5	32916694	-	5	1
RNA	GTAGCCTTGGATTTCAAGCANGG	GcAGCCc-aGATTgCAAtCATGG	5	32916694	-	5	1
RNA	GTAGCCTTGGATTTCAAGCANGG	GaAGCg-TGGATTagAAGaAGGG	5	34790797	-	5	1
RNA	GTAGCCTTGGATTTCAAGCANGG	GaAGCgT-GGATTagAAGaAGGG	5	34790797	-	5	1
[truncated: 1,144 more rows]

## Sheet: CYP93E2 gRNA2
#Bulge type	crRNA	DNA	Chromosome	Position	Direction	Mismatches	Bulge Size
X	GCAAAGCAAGTGAAGAACCANGG	GCAAAGCAAGTGAAGAACCAGGG	7	19506362	+	0	0
RNA	GCAAAGCAAGTGAAGAACCANGG	GCAAAGCAAGTGAAGAA-CcAGG	7	19506362	+	1	1
RNA	GCAAAGCAAGTGAAGAACCANGG	GCAAAGCAAGTGAAGAAC-cAGG	7	19506362	+	1	1
RNA	GCAAAGCAAGTGAAGAACCANGG	c-AAAGCAAGTGAAGAACCAGGG	7	19506363	+	1	1
DNA	G-CAAAGCAAGTGAAGAACCANGG	aGCAAAGCAAGTGAAGAACCAGGG	7	19506361	+	1	1
RNA	GCAAAGCAAGTGAAGAACCANGG	GCAAAGCAAGTGAAG-AaCcAGG	7	19506362	+	2	1
RNA	GCAAAGCAAGTGAAGAACCANGG	GCAAAGCAAGTGAAGA-aCcAGG	7	19506362	+	2	1
X	GCAAAGCAAGTGAAGAACCANGG	GCAAAGCtAGTGAAGAACCtGGG	3	6026743	+	2	0
RNA	GCAAAGCAAGTGAAGAACCANGG	GCAAAGCtAGTGAAGAA-CcTGG	3	6026743	+	2	1
RNA	GCAAAGCAAGTGAAGAACCANGG	GCAAAGCtAGTGAAGAAC-cTGG	3	6026743	+	2	1
RNA	GCAAAGCAAGTGAAGAACCANGG	GCAAAGaAA-TGAAGAACaATGG	1	825284	-	2	1
RNA	GCAAAGCAAGTGAAGAACCANGG	tCAAAGCAA-TGAAGAtCCAAGG	3	10179592	-	2	1
RNA	GCAAAGCAAGTGAAGAACCANGG	GgAAAGCAAGaG-AGAACCAAGG	scaffold0118	8198	-	2	1
RNA	GCAAAGCAAGTGAAGAACCANGG	GgAAAGCAAGaGA-GAACCAAGG	scaffold0118	8198	-	2	1
RNA	GCAAAGCAAGTGAAGAACCANGG	GaAAAGCAAGaG-AGAACCAAGG	scaffold0001	511687	+	2	1
RNA	GCAAAGCAAGTGAAGAACCANGG	GaAAAGCAAGaGA-GAACCAAGG	scaffold0001	511687	+	2	1
RNA	GCAAAGCAAGTGAAGAACCANGG	GaAAAGCAAGaG-AGAACCAAGG	5	18567573	-	2	1
RNA	GCAAAGCAAGTGAAGAACCANGG	GaAAAGCAAGaGA-GAACCAAGG	5	18567573	-	2	1
RNA	GCAAAGCAAGTGAAGAACCANGG	GaAAAGCAAGaG-AGAACCAAGG	8	40143413	+	2	1
RNA	GCAAAGCAAGTGAAGAACCANGG	GaAAAGCAAGaGA-GAACCAAGG	8	40143413	+	2	1
RNA	GCAAAGCAAGTGAAGAACCANGG	GaAAAGCAAGaG-AGAACCAAGG	7	2387694	+	2	1
RNA	GCAAAGCAAGTGAAGAACCANGG	GaAAAGCAAGaGA-GAACCAAGG	7	2387694	+	2	1
RNA	GCAAAGCAAGTGAAGAACCANGG	GaAAAGCAAGaG-AGAACCAAGG	7	21758328	-	2	1
RNA	GCAAAGCAAGTGAAGAACCANGG	GaAAAGCAAGaGA-GAACCAAGG	7	21758328	-	2	1
RNA	GCAAAGCAAGTGAAGAACCANGG	GaAAAGCAAGaG-AGAACCAAGG	3	29494572	-	2	1
RNA	GCAAAGCAAGTGAAGAACCANGG	GaAAAGCAAGaGA-GAACCAAGG	3	29494572	-	2	1
RNA	GCAAAGCAAGTGAAGAACCANGG	ca-AAGCAAGTGAAGAACCAGGG	7	19506363	+	2	1
RNA	GCAAAGCAAGTGAAGAACCANGG	caA-AGCAAGTGAAGAACCAGGG	7	19506363	+	2	1
RNA	GCAAAGCAAGTGAAGAACCANGG	caAA-GCAAGTGAAGAACCAGGG	7	19506363	+	2	1
RNA	GCAAAGCAAGTGAAGAACCANGG	GCAAAatAAGT-AAGAACCATGG	3	20690660	+	2	1
RNA	GCAAAGCAAGTGAAGAACCANGG	GCAAAG-AAaTGAAGAACaATGG	1	825284	-	2	1
RNA	GCAAAGCAAGTGAAGAACCANGG	cCcAAGC-AGTGAAGAACCATGG	7	6321200	+	2	1
RNA	GCAAAGCAAGTGAAGAACCANGG	cCcAAGCA-GTGAAGAACCATGG	7	6321200	+	2	1
RNA	GCAAAGCAAGTGAAGAACCANGG	GaAAAGCAAGaG-AGAACCAAGG	4	51931259	+	2	1
RNA	GCAAAGCAAGTGAAGAACCANGG	GaAAAGCAAGaGA-GAACCAAGG	4	51931259	+	2	1
DNA	GCAAAGCAAGTGAAGAA-CCANGG	GCAAAGagAGTGAAGAAACCAGGG	4	43094875	+	2	1
DNA	GCAAAGCAAGTGAAGA-ACCANGG	GCAAAGagAGTGAAGAAACCAGGG	4	43094875	+	2	1
DNA	GCAAAGCAAGTGAAG-AACCANGG	GCAAAGagAGTGAAGAAACCAGGG	4	43094875	+	2	1
DNA	GC-AAAGCAAGTGAAGAACCANGG	agCAAAGCAAGTGAAGAACCAGGG	7	19506361	+	2	1
RNA	GCAAAGCAAGTGAAGAACCANGG	GgAAtGgAAGTGAAG-ACCACGG	5	12245731	+	3	1
RNA	GCAAAGCAAGTGAAGAACCANGG	GgAAtGgAAGTGAAGA-CCACGG	5	12245731	+	3	1
RNA	GCAAAGCAAGTGAAGAACCANGG	tCcAAGCAAGTGAAG-tCCATGG	1	33115800	-	3	1
RNA	GCAAAGCAAGTGAAGAACCANGG	tCcAAGCAAGTGAAGt-CCATGG	1	33115800	-	3	1
RNA	GCAAAGCAAGTGAAGAACCANGG	GCAAAGCtAGTGAAG-AaCcTGG	3	6026743	+	3	1
RNA	GCAAAGCAAGTGAAGAACCANGG	GCAAAGCtAGTGAAGA-aCcTGG	3	6026743	+	3	1
RNA	GCAAAGCAAGTGAAGAACCANGG	GgAAAGCAAGaGAg-AACCAAGG	scaffold0118	8198	-	3	1
RNA	GCAAAGCAAGTGAAGAACCANGG	GaAAAGCAAGaGAg-AACCAAGG	scaffold0001	511687	+	3	1
RNA	GCAAAGCAAGTGAAGAACCANGG	GaAAAGCAAGaGAg-AACCAAGG	5	18567573	-	3	1
RNA	GCAAAGCAAGTGAAGAACCANGG	GaAAAGCAAGaGAg-AACCAAGG	8	40143413	+	3	1
RNA	GCAAAGCAAGTGAAGAACCANGG	GCAAtGgAAGTGAA-AAgCATGG	2	37340072	-	3	1
RNA	GCAAAGCAAGTGAAGAACCANGG	GaAAAGCAAGaGAg-AACCAAGG	7	2387694	+	3	1
RNA	GCAAAGCAAGTGAAGAACCANGG	GCAAAGaAAaTGAA-AAtCAGGG	7	12109596	+	3	1
RNA	GCAAAGCAAGTGAAGAACCANGG	GCAAAGCAAGTGAA-gAaCcAGG	7	19506362	+	3	1
RNA	GCAAAGCAAGTGAAGAACCANGG	GaAAAGCAAGaGAg-AACCAAGG	7	21758328	-	3	1
RNA	GCAAAGCAAGTGAAGAACCANGG	GCAAtcCAAGTGAA-AAgCATGG	1	30811504	-	3	1
RNA	GCAAAGCAAGTGAAGAACCANGG	GCAAAGacAGTGAA-AtCCAAGG	1	38284618	+	3	1
RNA	GCAAAGCAAGTGAAGAACCANGG	GaAAAGCAAGaGAg-AACCAAGG	3	29494572	-	3	1
RNA	GCAAAGCAAGTGAAGAACCANGG	GCAAA-aAAGTGtAaAACCACGG	6	3209980	-	3	1
RNA	GCAAAGCAAGTGAAGAACCANGG	GaAAA-CAtGTGAAGAAtCAAGG	6	26512719	-	3	1
RNA	GCAAAGCAAGTGAAGAACCANGG	GaAAA-CAtGTGAAGAAtCAAGG	6	26517835	-	3	1
RNA	GCAAAGCAAGTGAAGAACCANGG	aaAAA-CAAGTGAAaAACCAGGG	5	8376214	-	3	1
RNA	GCAAAGCAAGTGAAGAACCANGG	GCAAA-CActTGAAGcACCAAGG	5	17033763	-	3	1
RNA	GCAAAGCAAGTGAAGAACCANGG	aCAAA-CAAaTaAAGAACCAAGG	5	42355363	-	3	1
RNA	GCAAAGCAAGTGAAGAACCANGG	GCAAA-CAAGTGAtGAAttAGGG	8	28068576	-	3	1
RNA	GCAAAGCAAGTGAAGAACCANGG	GCAAA-aAAGTGAAGAAaaATGG	7	1970193	-	3	1
RNA	GCAAAGCAAGTGAAGAACCANGG	caAAg-CAAGTGAAGAACCAGGG	7	19506363	+	3	1
RNA	GCAAAGCAAGTGAAGAACCANGG	GCAAA-gAAaTGAAGAACaATGG	1	825284	-	3	1
RNA	GCAAAGCAAGTGAAGAACCANGG	GCtAA-CAtGTGAAGAAtCATGG	1	10932011	+	3	1
X	GCAAAGCAAGTGAAGAACCANGG	GCAtAGgAAtTGAAGAACCAGGG	scaffold0032	70628	+	3	0
X	GCAAAGCAAGTGAAGAACCANGG	GaAAAaCAAGTGAAaAACCAGGG	5	8376214	-	3	0
RNA	GCAAAGCAAGTGAAGAACCANGG	GCAAAGCAAtcGAAGAA-aAAGG	5	1870257	+	3	1
RNA	GCAAAGCAAGTGAAGAACCANGG	GCAAAGCAAtcGAAGAAa-AAGG	5	1870257	+	3	1
RNA	GCAAAGCAAGTGAAGAACCANGG	ctAAAGCAAGTaAAGAA-CAAGG	5	13142821	+	3	1
RNA	GCAAAGCAAGTGAAGAACCANGG	ctAAAGCAAGTaAAGAAC-AAGG	5	13142821	+	3	1
RNA	GCAAAGCAAGTGAAGAACCANGG	tCAAAcCAAGTcAAGAA-CACGG	2	44613431	-	3	1
RNA	GCAAAGCAAGTGAAGAACCANGG	tCAAAcCAAGTcAAGAAC-ACGG	2	44613431	-	3	1
RNA	GCAAAGCAAGTGAAGAACCANGG	ctAAAGCAAGTaAAGAA-CAAGG	7	29010898	-	3	1
RNA	GCAAAGCAAGTGAAGAACCANGG	ctAAAGCAAGTaAAGAAC-AAGG	7	29010898	-	3	1
RNA	GCAAAGCAAGTGAAGAACCANGG	GgAgAGCAAaTGAAGAA-CATGG	1	17308324	-	3	1
RNA	GCAAAGCAAGTGAAGAACCANGG	GgAgAGCAAaTGAAGAAC-ATGG	1	17308324	-	3	1
RNA	GCAAAGCAAGTGAAGAACCANGG	cCcAAGCAg-TGAAGAACCATGG	7	6321200	+	3	1
RNA	GCAAAGCAAGTGAAGAACCANGG	GCAAAGaAA-TGAgGgACCATGG	3	28526209	+	3	1
RNA	GCAAAGCAAGTGAAGAACCANGG	GCAAAGaAAGaG-AGAACCtCGG	6	3122846	-	3	1
RNA	GCAAAGCAAGTGAAGAACCANGG	GCAAAGaAAGaGA-GAACCtCGG	6	3122846	-	3	1
RNA	GCAAAGCAAGTGAAGAACCANGG	agAAAGCAAGaG-AGAACCAAGG	6	25559015	+	3	1
RNA	GCAAAGCAAGTGAAGAACCANGG	agAAAGCAAGaGA-GAACCAAGG	6	25559015	+	3	1
RNA	GCAAAGCAAGTGAAGAACCANGG	agAAAGCAAGaG-AGAACCAAGG	5	7507121	+	3	1
RNA	GCAAAGCAAGTGAAGAACCANGG	agAAAGCAAGaGA-GAACCAAGG	5	7507121	+	3	1
RNA	GCAAAGCAAGTGAAGAACCANGG	agAAAGCAAGaG-AGAACCAAGG	5	11996126	-	3	1
RNA	GCAAAGCAAGTGAAGAACCANGG	agAAAGCAAGaGA-GAACCAAGG	5	11996126	-	3	1
RNA	GCAAAGCAAGTGAAGAACCANGG	agAAAGCAAGaG-AGAACCAAGG	5	20341522	-	3	1
RNA	GCAAAGCAAGTGAAGAACCANGG	agAAAGCAAGaGA-GAACCAAGG	5	20341522	-	3	1
RNA	GCAAAGCAAGTGAAGAACCANGG	agAAAGCAAGaG-AGAACCAAGG	5	20348126	-	3	1
RNA	GCAAAGCAAGTGAAGAACCANGG	agAAAGCAAGaGA-GAACCAAGG	5	20348126	-	3	1
RNA	GCAAAGCAAGTGAAGAACCANGG	agAAAGCAAGaG-AGAACCAAGG	8	23748648	-	3	1
RNA	GCAAAGCAAGTGAAGAACCANGG	agAAAGCAAGaGA-GAACCAAGG	8	23748648	-	3	1
RNA	GCAAAGCAAGTGAAGAACCANGG	agAAAGCAAGaG-AGAACCAAGG	8	26485087	+	3	1
RNA	GCAAAGCAAGTGAAGAACCANGG	agAAAGCAAGaGA-GAACCAAGG	8	26485087	+	3	1
RNA	GCAAAGCAAGTGAAGAACCANGG	agAAAGCAAGaG-AGAACCAAGG	2	31829642	-	3	1
RNA	GCAAAGCAAGTGAAGAACCANGG	agAAAGCAAGaGA-GAACCAAGG	2	31829642	-	3	1
RNA	GCAAAGCAAGTGAAGAACCANGG	agAAAGCAAGaG-AGAACCAAGG	2	31834994	-	3	1
RNA	GCAAAGCAAGTGAAGAACCANGG	agAAAGCAAGaGA-GAACCAAGG	2	31834994	-	3	1
RNA	GCAAAGCAAGTGAAGAACCANGG	GgAAAaCAAGaG-AGAACCAGGG	7	13452914	+	3	1
RNA	GCAAAGCAAGTGAAGAACCANGG	GgAAAaCAAGaGA-GAACCAGGG	7	13452914	+	3	1
RNA	GCAAAGCAAGTGAAGAACCANGG	agAAAGCAAGaG-AGAACCAAGG	7	37288502	-	3	1
RNA	GCAAAGCAAGTGAAGAACCANGG	agAAAGCAAGaGA-GAACCAAGG	7	37288502	-	3	1
RNA	GCAAAGCAAGTGAAGAACCANGG	agAAAGCAAGaG-AGAACCAAGG	7	46650740	-	3	1
RNA	GCAAAGCAAGTGAAGAACCANGG	agAAAGCAAGaGA-GAACCAAGG	7	46650740	-	3	1
RNA	GCAAAGCAAGTGAAGAACCANGG	agAAAGCAAGaG-AGAACCAAGG	1	20293712	-	3	1
RNA	GCAAAGCAAGTGAAGAACCANGG	agAAAGCAAGaGA-GAACCAAGG	1	20293712	-	3	1
RNA	GCAAAGCAAGTGAAGAACCANGG	agAAAGCAAGaG-AGAACCAAGG	1	20300343	-	3	1
RNA	GCAAAGCAAGTGAAGAACCANGG	agAAAGCAAGaGA-GAACCAAGG	1	20300343	-	3	1
RNA	GCAAAGCAAGTGAAGAACCANGG	GagAAGCAAGaG-AGAACCAAGG	3	19343376	+	3	1
RNA	GCAAAGCAAGTGAAGAACCANGG	GagAAGCAAGaGA-GAACCAAGG	3	19343376	+	3	1
RNA	GCAAAGCAAGTGAAGAACCANGG	GCAAAatAAGTa-AGAACCATGG	3	20690660	+	3	1
RNA	GCAAAGCAAGTGAAGAACCANGG	GCAAAatAAGTaA-GAACCATGG	3	20690660	+	3	1
RNA	GCAAAGCAAGTGAAGAACCANGG	agAAAGCAAGaG-AGAACCAAGG	4	1584892	-	3	1
RNA	GCAAAGCAAGTGAAGAACCANGG	agAAAGCAAGaGA-GAACCAAGG	4	1584892	-	3	1
RNA	GCAAAGCAAGTGAAGAACCANGG	GCAgAGCAAcTt-AGAACCAAGG	4	5939899	-	3	1
RNA	GCAAAGCAAGTGAAGAACCANGG	GCAgAGCAAcTtA-GAACCAAGG	4	5939899	-	3	1
RNA	GCAAAGCAAGTGAAGAACCANGG	tC-AAGCAtGTGAAGAAtCACGG	1	16121348	+	3	1
RNA	GCAAAGCAAGTGAAGAACCANGG	tCA-AGCAtGTGAAGAAtCACGG	1	16121348	+	3	1
RNA	GCAAAGCAAGTGAAGAACCANGG	tCAA-GCAtGTGAAGAAtCACGG	1	16121348	+	3	1
RNA	GCAAAGCAAGTGAAGAACCANGG	G-AAAaCAtGTGAAGAAtCAAGG	6	26512719	-	3	1
RNA	GCAAAGCAAGTGAAGAACCANGG	G-AAAaCAtGTGAAGAAtCAAGG	6	26517835	-	3	1
RNA	GCAAAGCAAGTGAAGAACCANGG	a-AAAaCAAGTGAAaAACCAGGG	5	8376214	-	3	1
RNA	GCAAAGCAAGTGAAGAACCANGG	G-AcAtCAAGTGAAGAAtCAAGG	5	19763833	-	3	1
RNA	GCAAAGCAAGTGAAGAACCANGG	G-AAAGtAAGaGAAGAACaAAGG	8	12849893	-	3	1
RNA	GCAAAGCAAGTGAAGAACCANGG	G-AtAGCAAGaGAtGAACCACGG	7	39222544	+	3	1
RNA	GCAAAGCAAGTGAAGAACCANGG	c-AAAGCtAGTGAAGAACCtGGG	3	6026744	+	3	1
RNA	GCAAAGCAAGTGAAGAACCANGG	G-AAAGaAAtTaAAGAACCAAGG	3	20002428	-	3	1
RNA	GCAAAGCAAGTGAAGAACCANGG	G-AAAcCAcGTGAAGAAtCAAGG	3	21653495	+	3	1
RNA	GCAAAGCAAGTGAAGAACCANGG	G-AAAGaAAGTGAAtAAgCAAGG	4	7918909	+	3	1
RNA	GCAAAGCAAGTGAAGAACCANGG	GgAAAGCAAGa-gAGAACCAAGG	scaffold0118	8198	-	3	1
RNA	GCAAAGCAAGTGAAGAACCANGG	GaAAAGCAAGa-gAGAACCAAGG	scaffold0001	511687	+	3	1
RNA	GCAAAGCAAGTGAAGAACCANGG	GaAAAGCAAGa-gAGAACCAAGG	5	18567573	-	3	1
RNA	GCAAAGCAAGTGAAGAACCANGG	GaAAAGCAAGa-gAGAACCAAGG	8	40143413	+	3	1
RNA	GCAAAGCAAGTGAAGAACCANGG	GaAAAGCAAGa-gAGAACCAAGG	7	2387694	+	3	1
RNA	GCAAAGCAAGTGAAGAACCANGG	GaAAAGCAAGa-gAGAACCAAGG	7	21758328	-	3	1
RNA	GCAAAGCAAGTGAAGAACCANGG	tCAAAGCAtaT-AAGAACCATGG	7	31236402	-	3	1
RNA	GCAAAGCAAGTGAAGAACCANGG	tCAAAGCAAGc-AtGAACCAGGG	1	12694916	-	3	1
RNA	GCAAAGCAAGTGAAGAACCANGG	GaAAAGCAAGa-gAGAACCAAGG	3	29494572	-	3	1
RNA	GCAAAGCAAGTGAAGAACCANGG	GCAgAGCAAcT-tAGAACCAAGG	4	5939899	-	3	1
RNA	GCAAAGCAAGTGAAGAACCANGG	GCAAAGgAAG-GAAtAAaCATGG	scaffold0466	9525	-	3	1
RNA	GCAAAGCAAGTGAAGAACCANGG	GgAAAGCAAG-agAGAACCAAGG	scaffold0118	8198	-	3	1
RNA	GCAAAGCAAGTGAAGAACCANGG	GaAAAGCAAG-agAGAACCAAGG	scaffold0001	511687	+	3	1
RNA	GCAAAGCAAGTGAAGAACCANGG	GagAAcCAAG-GAAGAACCAAGG	6	25559026	+	3	1
RNA	GCAAAGCAAGTGAAGAACCANGG	GaAAAGCAAG-agAGAACCAAGG	5	18567573	-	3	1
RNA	GCAAAGCAAGTGAAGAACCANGG	GaAAAGCAAG-agAGAACCAAGG	8	40143413	+	3	1
RNA	GCAAAGCAAGTGAAGAACCANGG	GaAAAGCAAG-agAGAACCAAGG	7	2387694	+	3	1
RNA	GCAAAGCAAGTGAAGAACCANGG	GaAAAGCAAG-agAGAACCAAGG	7	21758328	-	3	1
RNA	GCAAAGCAAGTGAAGAACCANGG	GCAAAGaAAt-GAAGAACaATGG	1	825284	-	3	1
RNA	GCAAAGCAAGTGAAGAACCANGG	tCAAAGCAAG-cAtGAACCAGGG	1	12694916	-	3	1
RNA	GCAAAGCAAGTGAAGAACCANGG	tCAAAGCAAt-GAAGAtCCAAGG	3	10179592	-	3	1
RNA	GCAAAGCAAGTGAAGAACCANGG	GCAAAatAAG-tAAGAACCATGG	3	20690660	+	3	1
RNA	GCAAAGCAAGTGAAGAACCANGG	GaAAAGCAAG-agAGAACCAAGG	3	29494572	-	3	1
RNA	GCAAAGCAAGTGAAGAACCANGG	GCAAAa-AAGTGtAaAACCACGG	6	3209980	-	3	1
RNA	GCAAAGCAAGTGAAGAACCANGG	GCAAAG-AAGTGAAGAtCagAGG	6	30490468	+	3	1
RNA	GCAAAGCAAGTGAAGAACCANGG	GCAAAa-AAGTGAAGAAaaATGG	7	1970193	-	3	1
RNA	GCAAAGCAAGTGAAGAACCANGG	cCcAAG-cAGTGAAGAACCATGG	7	6321200	+	3	1
RNA	GCAAAGCAAGTGAAGAACCANGG	GgAAAG-AAcTGAAGAAgCATGG	3	22158194	-	3	1
RNA	GCAAAGCAAGTGAAGAACCANGG	GCAAAG-AAaTGAgGgACCATGG	3	28526209	+	3	1
RNA	GCAAAGCAAGTGAAGAACCANGG	GCAAAGa-AaTGAAGAACaATGG	1	825284	-	3	1
RNA	GCAAAGCAAGTGAAGAACCANGG	GCAAAGaA-aTGAAGAACaATGG	1	825284	-	3	1
RNA	GCAAAGCAAGTGAAGAACCANGG	tCAAAGC-AaTGAAGAtCCAAGG	3	10179592	-	3	1
RNA	GCAAAGCAAGTGAAGAACCANGG	tCAAAGCA-aTGAAGAtCCAAGG	3	10179592	-	3	1
RNA	GCAAAGCAAGTGAAGAACCANGG	GCAAtGgAAGTGAA-AAgCATGG	4	16744650	+	3	1
RNA	GCAAAGCAAGTGAAGAACCANGG	cCAAtGaAAGTGAA-AACCATGG	4	26240585	-	3	1
RNA	GCAAAGCAAGTGAAGAACCANGG	GCAAAGCAAaTcAA-AAtCAGGG	4	32791782	-	3	1
RNA	GCAAAGCAAGTGAAGAACCANGG	GaAAAGCAAGaGAg-AACCAAGG	4	51931259	+	3	1
RNA	GCAAAGCAAGTGAAGAACCANGG	GCAAAGCAAaTcAA-AAtCACGG	4	52583859	-	3	1
RNA	GCAAAGCAAGTGAAGAACCANGG	cCAAAtCAAaTGAAGAA-CAAGG	4	49806929	+	3	1
RNA	GCAAAGCAAGTGAAGAACCANGG	cCAAAtCAAaTGAAGAAC-AAGG	4	49806929	+	3	1
RNA	GCAAAGCAAGTGAAGAACCANGG	GgAAAGCcA-TGcAGAACCAAGG	4	25521670	+	3	1
RNA	GCAAAGCAAGTGAAGAACCANGG	GaAAAGCAA-aGAAcAACCATGG	4	31625817	+	3	1
RNA	GCAAAGCAAGTGAAGAACCANGG	GaAAAGCAA-aGAAcAACCATGG	4	31621413	+	3	1
RNA	GCAAAGCAAGTGAAGAACCANGG	GC-AAGaAAaTGAAGAACaAAGG	4	24285550	-	3	1
RNA	GCAAAGCAAGTGAAGAACCANGG	GCA-AGaAAaTGAAGAACaAAGG	4	24285550	-	3	1
RNA	GCAAAGCAAGTGAAGAACCANGG	GCAA-GaAAaTGAAGAACaAAGG	4	24285550	-	3	1
RNA	GCAAAGCAAGTGAAGAACCANGG	GC-AtGCActTGAAGAACCAAGG	4	54335495	+	3	1
RNA	GCAAAGCAAGTGAAGAACCANGG	GCA-tGCActTGAAGAACCAAGG	4	54335495	+	3	1
RNA	GCAAAGCAAGTGAAGAACCANGG	GCAt-GCActTGAAGAACCAAGG	4	54335495	+	3	1
RNA	GCAAAGCAAGTGAAGAACCANGG	G-AAAGgAAGaGAAGAACgATGG	4	20744712	+	3	1
RNA	GCAAAGCAAGTGAAGAACCANGG	GCAcAGaAAGT-AAGAACaAAGG	4	20903434	-	3	1
RNA	GCAAAGCAAGTGAAGAACCANGG	GaAAAGCAAGa-gAGAACCAAGG	4	51931259	+	3	1
RNA	GCAAAGCAAGTGAAGAACCANGG	GaAAAGCAAa-GAAcAACCATGG	4	31625817	+	3	1
RNA	GCAAAGCAAGTGAAGAACCANGG	GaAAAGCAAa-GAAcAACCATGG	4	31621413	+	3	1
RNA	GCAAAGCAAGTGAAGAACCANGG	GaAAAGCAAG-agAGAACCAAGG	4	51931259	+	3	1
RNA	GCAAAGCAAGTGAAGAACCANGG	cCAAAG-AAGTGAAatACCATGG	4	39288744	+	3	1
RNA	GCAAAGCAAGTGAAGAACCANGG	GagAAG-AAGTGAAGAAtCATGG	4	50492294	-	3	1
DNA	GCAAAGCAAGTGAAGAACC-ANGG	GCAtAGCAAGTGAAGcACaAAAGG	5	11834524	+	3	1
DNA	GCAAAGCAAGTGAAGAACC-ANGG	GCAtAGCAAGTGAAGcACaGAAGG	5	11882136	+	3	1
DNA	GCAAAGCAAGTGAAGAACC-ANGG	GCAtAGCAAGTGAAGcACaAAAGG	5	11748405	-	3	1
DNA	GCAAAGCAAGTGAAGAACC-ANGG	GCAAAGagAGTGAAGAAaCCAGGG	4	43094875	+	3	1
DNA	GCAAAGCAAGTGAAGAAC-CANGG	GCAtAGCAAGTGAAGcACAaAAGG	5	11834524	+	3	1
DNA	GCAAAGCAAGTGAAGAAC-CANGG	GCAtAGCAAGTGAAGcACAgAAGG	5	11882136	+	3	1
DNA	GCAAAGCAAGTGAAGAAC-CANGG	GCAtAGCAAGTGAAGcACAaAAGG	5	11748405	-	3	1
DNA	GCAAAGCAAGTGAAGAAC-CANGG	aCAAAGCAAaTGgAGAACTCAGGG	7	33148250	-	3	1
DNA	GCAAAGCAAGTGAAGAAC-CANGG	GCAAAGagAGTGAAGAAaCCAGGG	4	43094875	+	3	1
DNA	GCAAAGCAAGTGAAGAA-CCANGG	GCAAgaCAAGTGAgGAATCCATGG	2	1414020	-	3	1
DNA	GCAAAGCAAGTGAAGA-ACCANGG	aCAAAGaAAGTGAAGAGAgCAAGG	5	38536963	-	3	1
DNA	GCAAAGCAAGTGAAG-AACCANGG	GCAAAaCAAGTGAgGGAACCtGGG	7	32256143	-	3	1
DNA	GCAAAGCAAGTGAA-GAACCANGG	tCAAAGCAAGTGttTGAACCAAGG	6	8139700	+	3	1
DNA	GCAAAGCAAGTGAA-GAACCANGG	GCAAAGgcAGTGAAAGAAaCATGG	8	42517739	-	3	1
DNA	GCAAAGCAAGTGAA-GAACCANGG	GCAAAaCAAGTGAgGGAACCtGGG	7	32256143	-	3	1
DNA	GCAAAGCAAGTGAA-GAACCANGG	GCAAAGagAGTGAAGaAACCAGGG	4	43094875	+	3	1
DNA	GCAAAGCAAGTGA-AGAACCANGG	tCAAAGCAAGTGtTtGAACCAAGG	6	8139700	+	3	1
DNA	GCAAAGCAAGTGA-AGAACCANGG	GCAAAGgcAGTGAAAGAAaCATGG	8	42517739	-	3	1
DNA	GCAAAGCAAGTGA-AGAACCANGG	GCAAAaCAAGTGAGgGAACCtGGG	7	32256143	-	3	1
DNA	GCAAAGCAAGTG-AAGAACCANGG	tCAAAGCAAaTGTAAaAACCAGGG	6	3899243	+	3	1
DNA	GCAAAGCAAGTG-AAGAACCANGG	tCAAAGCAAGTGTttGAACCAAGG	6	8139700	+	3	1
DNA	GCAAAGCAAGTG-AAGAACCANGG	GCAAAGgcAGTGAAAGAAaCATGG	8	42517739	-	3	1
DNA	GCAAAGCAAGT-GAAGAACCANGG	GCgAAGCAAtTTGAAGAACgATGG	2	39473500	-	3	1
DNA	GCAAAGCAAG-TGAAGAACCANGG	GCcAAGCAAtATGAAGAAtCAAGG	scaffold0111	42913	+	3	1
DNA	GCAAAGCAAG-TGAAGAACCANGG	GgAAAGaAAGATGAAGAtCCATGG	5	3412874	-	3	1
DNA	GCAAAGCAAG-TGAAGAACCANGG	GCgAAGCAAtTTGAAGAACgATGG	2	39473500	-	3	1
DNA	GCAAAGCAA-GTGAAGAACCANGG	GCcAAGCAATaTGAAGAAtCAAGG	scaffold0111	42913	+	3	1
DNA	GCAAAGCAA-GTGAAGAACCANGG	GtAAAGaAAAGTaAAGAACCATGG	8	40036202	+	3	1
DNA	GCAAAGCAA-GTGAAGAACCANGG	GCgAAGCAATtTGAAGAACgATGG	2	39473500	-	3	1
DNA	GCAAAGCA-AGTGAAGAACCANGG	GCAAcGCATAGTGAAGAAtCtGGG	5	6442851	-	3	1
DNA	GCAAAGCA-AGTGAAGAACCANGG	GtAAAGaAAAGTaAAGAACCATGG	8	40036202	+	3	1
DNA	GCAAAGC-AAGTGAAGAACCANGG	GtAAAGaAAAGTaAAGAACCATGG	8	40036202	+	3	1
DNA	GCAAAG-CAAGTGAAGAACCANGG	GtAAAGAaAAGTaAAGAACCATGG	8	40036202	+	3	1
DNA	GCAAA-GCAAGTGAAGAACCANGG	GaAAACGCAAGTcAAGAAtCATGG	scaffold1799	471	-	3	1
DNA	GCAAA-GCAAGTGAAGAACCANGG	GCAAATGCAAGTGAcaAAtCAAGG	8	25931298	+	3	1
DNA	GCAAA-GCAAGTGAAGAACCANGG	agcAAAGCAAGTGAAGAACCAGGG	7	19506361	+	3	1
DNA	GCAA-AGCAAGTGAAGAACCANGG	agcAAAGCAAGTGAAGAACCAGGG	7	19506361	+	3	1
DNA	GCA-AAGCAAGTGAAGAACCANGG	agcAAAGCAAGTGAAGAACCAGGG	7	19506361	+	3	1
DNA	GCA-AAGCAAGTGAAGAACCANGG	GaAGAAGaAAGaGAAGAACCAGGG	1	21080007	+	3	1
DNA	GC-AAAGCAAGTGAAGAACCANGG	GCTAAAGCAtcTGAAGAACtATGG	scaffold0010	108273	-	3	1
DNA	GC-AAAGCAAGTGAAGAACCANGG	GCCAAAGCAgGaGtAGAACCACGG	5	42720512	-	3	1
DNA	GC-AAAGCAAGTGAAGAACCANGG	GCCAAAGCtAGTGcAGcACCAAGG	2	6552267	-	3	1
DNA	G-CAAAGCAAGTGAAGAACCANGG	GCCAAAGCAgGaGtAGAACCACGG	5	42720512	-	3	1
DNA	G-CAAAGCAAGTGAAGAACCANGG	GCCAAAGCtAGTGcAGcACCAAGG	2	6552267	-	3	1
DNA	G-CAAAGCAAGTGAAGAACCANGG	GTCAAtGaAAGaGAAGAACCAAGG	1	13074669	-	3	1
DNA	G-CAAAGCAAGTGAAGAACCANGG	tGCAAAGCtAGTGAAGAACCtGGG	3	6026742	+	3	1
RNA	GCAAAGCAAGTGAAGAACCANGG	GgAAAGCAAGaGAga-ACCAAGG	scaffold0118	8198	-	4	1
RNA	GCAAAGCAAGTGAAGAACCANGG	GgAAAGCAAGaGAgaA-CCAAGG	scaffold0118	8198	-	4	1
RNA	GCAAAGCAAGTGAAGAACCANGG	GaAAAGCAAGaGAga-ACCAAGG	scaffold0001	511687	+	4	1
RNA	GCAAAGCAAGTGAAGAACCANGG	GaAAAGCAAGaGAgaA-CCAAGG	scaffold0001	511687	+	4	1
RNA	GCAAAGCAAGTGAAGAACCANGG	tCAAAaCAAGTGAAG-AggATGG	6	8434871	+	4	1
RNA	GCAAAGCAAGTGAAGAACCANGG	tCAAAaCAAGTGAAGA-ggATGG	6	8434871	+	4	1
RNA	GCAAAGCAAGTGAAGAACCANGG	GCAAAGaAAGTaAtG-cCCATGG	6	21357034	-	4	1
RNA	GCAAAGCAAGTGAAGAACCANGG	GCAAAGaAAGTaAtGc-CCATGG	6	21357034	-	4	1
RNA	GCAAAGCAAGTGAAGAACCANGG	GCAAAGaAAGTaAtG-cCCATGG	6	23961016	-	4	1
RNA	GCAAAGCAAGTGAAGAACCANGG	GCAAAGaAAGTaAtGc-CCATGG	6	23961016	-	4	1
RNA	GCAAAGCAAGTGAAGAACCANGG	cCAAAaCAAaaGAAG-ACCAAGG	6	24748186	-	4	1
RNA	GCAAAGCAAGTGAAGAACCANGG	cCAAAaCAAaaGAAGA-CCAAGG	6	24748186	-	4	1
RNA	GCAAAGCAAGTGAAGAACCANGG	aCAAAaCAAGgGAAG-AtCAAGG	6	24935701	-	4	1
RNA	GCAAAGCAAGTGAAGAACCANGG	aCAAAaCAAGgGAAGA-tCAAGG	6	24935701	-	4	1
RNA	GCAAAGCAAGTGAAGAACCANGG	GCcAAGgAgGaGAAG-ACCAGGG	6	33162936	-	4	1
RNA	GCAAAGCAAGTGAAGAACCANGG	GCcAAGgAgGaGAAGA-CCAGGG	6	33162936	-	4	1
RNA	GCAAAGCAAGTGAAGAACCANGG	GCAAAGCAAtcGAAG-AaaAAGG	5	1870257	+	4	1
RNA	GCAAAGCAAGTGAAGAACCANGG	GCAAAGCAAtcGAAGA-aaAAGG	5	1870257	+	4	1
RNA	GCAAAGCAAGTGAAGAACCANGG	aCAAAGCAAaTcAAG-ACgAAGG	5	9102845	+	4	1
RNA	GCAAAGCAAGTGAAGAACCANGG	aCAAAGCAAaTcAAGA-CgAAGG	5	9102845	+	4	1
RNA	GCAAAGCAAGTGAAGAACCANGG	ctAAAGCAAGTaAAG-AaCAAGG	5	13142821	+	4	1
RNA	GCAAAGCAAGTGAAGAACCANGG	ctAAAGCAAGTaAAGA-aCAAGG	5	13142821	+	4	1
RNA	GCAAAGCAAGTGAAGAACCANGG	GgAcAGaAtGTGAAG-ACCAAGG	5	14778329	+	4	1
RNA	GCAAAGCAAGTGAAGAACCANGG	GgAcAGaAtGTGAAGA-CCAAGG	5	14778329	+	4	1
RNA	GCAAAGCAAGTGAAGAACCANGG	GaAAAGCAAGaGAga-ACCAAGG	5	18567573	-	4	1
RNA	GCAAAGCAAGTGAAGAACCANGG	GaAAAGCAAGaGAgaA-CCAAGG	5	18567573	-	4	1
RNA	GCAAAGCAAGTGAAGAACCANGG	GCAAAtCcAtTGAAG-AtCATGG	5	40025688	-	4	1
RNA	GCAAAGCAAGTGAAGAACCANGG	GCAAAtCcAtTGAAGA-tCATGG	5	40025688	-	4	1
RNA	GCAAAGCAAGTGAAGAACCANGG	GCAAtGgAAGTGAAG-AggAAGG	8	15945820	+	4	1
RNA	GCAAAGCAAGTGAAGAACCANGG	GCAAtGgAAGTGAAGA-ggAAGG	8	15945820	+	4	1
RNA	GCAAAGCAAGTGAAGAACCANGG	GCAtAGgAAtTGAAG-ACgAGGG	8	17816404	+	4	1
RNA	GCAAAGCAAGTGAAGAACCANGG	GCAtAGgAAtTGAAGA-CgAGGG	8	17816404	+	4	1
RNA	GCAAAGCAAGTGAAGAACCANGG	GgAAAGaAAGTGgAG-ACaATGG	8	37510861	+	4	1
RNA	GCAAAGCAAGTGAAGAACCANGG	GgAAAGaAAGTGgAGA-CaATGG	8	37510861	+	4	1
RNA	GCAAAGCAAGTGAAGAACCANGG	GaAAAGCAAGaGAga-ACCAAGG	8	40143413	+	4	1
RNA	GCAAAGCAAGTGAAGAACCANGG	GaAAAGCAAGaGAgaA-CCAAGG	8	40143413	+	4	1
RNA	GCAAAGCAAGTGAAGAACCANGG	tCAAAGgAAGTtAAG-tCCATGG	8	45185934	-	4	1
RNA	GCAAAGCAAGTGAAGAACCANGG	tCAAAGgAAGTtAAGt-CCATGG	8	45185934	-	4	1
RNA	GCAAAGCAAGTGAAGAACCANGG	tCAAAGCAAGTtAAG-gCtAGGG	2	2912374	+	4	1
RNA	GCAAAGCAAGTGAAGAACCANGG	tCAAAGCAAGTtAAGg-CtAGGG	2	2912374	+	4	1
RNA	GCAAAGCAAGTGAAGAACCANGG	tCAAAtCAAGTGAAG-gCCcAGG	2	11473714	-	4	1
RNA	GCAAAGCAAGTGAAGAACCANGG	tCAAAtCAAGTGAAGg-CCcAGG	2	11473714	-	4	1
RNA	GCAAAGCAAGTGAAGAACCANGG	GCAAAGCAAGTcttc-ACCATGG	2	23242969	+	4	1
RNA	GCAAAGCAAGTGAAGAACCANGG	GCAAAGCAAGTcttcA-CCATGG	2	23242969	+	4	1
RNA	GCAAAGCAAGTGAAGAACCANGG	GCAtAGCAAGaGAAG-cCaAGGG	2	25909863	+	4	1
RNA	GCAAAGCAAGTGAAGAACCANGG	GCAtAGCAAGaGAAGc-CaAGGG	2	25909863	+	4	1
RNA	GCAAAGCAAGTGAAGAACCANGG	GaAAAGCAAGaaAtG-ACCACGG	2	36355173	+	4	1
RNA	GCAAAGCAAGTGAAGAACCANGG	GaAAAGCAAGaaAtGA-CCACGG	2	36355173	+	4	1
RNA	GCAAAGCAAGTGAAGAACCANGG	GCAAtGgAAGTGAAa-AgCATGG	2	37340072	-	4	1
RNA	GCAAAGCAAGTGAAGAACCANGG	GCAAtGgAAGTGAAaA-gCATGG	2	37340072	-	4	1
RNA	GCAAAGCAAGTGAAGAACCANGG	tCAAAcCAAGTcAAG-AaCACGG	2	44613431	-	4	1
RNA	GCAAAGCAAGTGAAGAACCANGG	tCAAAcCAAGTcAAGA-aCACGG	2	44613431	-	4	1
RNA	GCAAAGCAAGTGAAGAACCANGG	GaAAAGCAAGaGAga-ACCAAGG	7	2387694	+	4	1
RNA	GCAAAGCAAGTGAAGAACCANGG	GaAAAGCAAGaGAgaA-CCAAGG	7	2387694	+	4	1
RNA	GCAAAGCAAGTGAAGAACCANGG	aCAAAGCAAtTGAAG-AgaAGGG	7	8241188	-	4	1
RNA	GCAAAGCAAGTGAAGAACCANGG	aCAAAGCAAtTGAAGA-gaAGGG	7	8241188	-	4	1
RNA	GCAAAGCAAGTGAAGAACCANGG	GCAAAGaAAaTGAAa-AtCAGGG	7	12109596	+	4	1
RNA	GCAAAGCAAGTGAAGAACCANGG	GCAAAGaAAaTGAAaA-tCAGGG	7	12109596	+	4	1
RNA	GCAAAGCAAGTGAAGAACCANGG	cCAAAGgAAGTGAAG-AgaAAGG	7	14607700	-	4	1
RNA	GCAAAGCAAGTGAAGAACCANGG	cCAAAGgAAGTGAAGA-gaAAGG	7	14607700	-	4	1
RNA	GCAAAGCAAGTGAAGAACCANGG	GaAAAGCAAGaGAga-ACCAAGG	7	21758328	-	4	1
RNA	GCAAAGCAAGTGAAGAACCANGG	GaAAAGCAAGaGAgaA-CCAAGG	7	21758328	-	4	1
RNA	GCAAAGCAAGTGAAGAACCANGG	ctAAAGCAAGTaAAG-AaCAAGG	7	29010898	-	4	1
RNA	GCAAAGCAAGTGAAGAACCANGG	ctAAAGCAAGTaAAGA-aCAAGG	7	29010898	-	4	1
RNA	GCAAAGCAAGTGAAGAACCANGG	GgAAAGaAAaTGAAG-tCCATGG	7	30974644	-	4	1
RNA	GCAAAGCAAGTGAAGAACCANGG	GgAAAGaAAaTGAAGt-CCATGG	7	30974644	-	4	1
RNA	GCAAAGCAAGTGAAGAACCANGG	GCAAAGatAGTGAAG-AggAAGG	7	36371286	-	4	1
RNA	GCAAAGCAAGTGAAGAACCANGG	GCAAAGatAGTGAAGA-ggAAGG	7	36371286	-	4	1
RNA	GCAAAGCAAGTGAAGAACCANGG	GCAAAatAAcaGAAG-ACCAAGG	7	42186992	+	4	1
RNA	GCAAAGCAAGTGAAGAACCANGG	GCAAAatAAcaGAAGA-CCAAGG	7	42186992	+	4	1
RNA	GCAAAGCAAGTGAAGAACCANGG	GCAAAGaAAaTGAtG-ACCgTGG	1	10903284	-	4	1
RNA	GCAAAGCAAGTGAAGAACCANGG	GCAAAGaAAaTGAtGA-CCgTGG	1	10903284	-	4	1
RNA	GCAAAGCAAGTGAAGAACCANGG	agAAAGtAAaTGAAG-ACCAGGG	1	15344318	-	4	1
RNA	GCAAAGCAAGTGAAGAACCANGG	agAAAGtAAaTGAAGA-CCAGGG	1	15344318	-	4	1
RNA	GCAAAGCAAGTGAAGAACCANGG	GgAgAGCAAaTGAAG-AaCATGG	1	17308324	-	4	1
RNA	GCAAAGCAAGTGAAGAACCANGG	GgAgAGCAAaTGAAGA-aCATGG	1	17308324	-	4	1
RNA	GCAAAGCAAGTGAAGAACCANGG	GCgAAGaAAGTaAtG-ACCATGG	1	19497147	-	4	1
RNA	GCAAAGCAAGTGAAGAACCANGG	GCgAAGaAAGTaAtGA-CCATGG	1	19497147	-	4	1
RNA	GCAAAGCAAGTGAAGAACCANGG	GCcAAGgAgGaGAAG-ACCAGGG	1	24206918	-	4	1
RNA	GCAAAGCAAGTGAAGAACCANGG	GCcAAGgAgGaGAAGA-CCAGGG	1	24206918	-	4	1
RNA	GCAAAGCAAGTGAAGAACCANGG	GCAAtcCAAGTGAAa-AgCATGG	1	30811504	-	4	1
RNA	GCAAAGCAAGTGAAGAACCANGG	GCAAtcCAAGTGAAaA-gCATGG	1	30811504	-	4	1
RNA	GCAAAGCAAGTGAAGAACCANGG	GCAAAGacAGTGAAa-tCCAAGG	1	38284618	+	4	1
RNA	GCAAAGCAAGTGAAGAACCANGG	GCAAAGacAGTGAAat-CCAAGG	1	38284618	+	4	1
RNA	GCAAAGCAAGTGAAGAACCANGG	GCcAAGgAgGaGAAG-ACCAGGG	1	45026700	-	4	1
RNA	GCAAAGCAAGTGAAGAACCANGG	GCcAAGgAgGaGAAGA-CCAGGG	1	45026700	-	4	1
RNA	GCAAAGCAAGTGAAGAACCANGG	cCAAAaCAcaTGAAG-ACCAAGG	1	50862710	-	4	1
RNA	GCAAAGCAAGTGAAGAACCANGG	cCAAAaCAcaTGAAGA-CCAAGG	1	50862710	-	4	1
RNA	GCAAAGCAAGTGAAGAACCANGG	cCAAAGCAAGTaAAG-ttCATGG	3	2196312	+	4	1
RNA	GCAAAGCAAGTGAAGAACCANGG	cCAAAGCAAGTaAAGt-tCATGG	3	2196312	+	4	1
RNA	GCAAAGCAAGTGAAGAACCANGG	tgAAAGCAAGTGAAG-AgtATGG	3	4321446	-	4	1
RNA	GCAAAGCAAGTGAAGAACCANGG	tgAAAGCAAGTGAAGA-gtATGG	3	4321446	-	4	1
RNA	GCAAAGCAAGTGAAGAACCANGG	GCtAAGCAAGaGtAG-tCCAAGG	3	7618114	-	4	1
RNA	GCAAAGCAAGTGAAGAACCANGG	GCtAAGCAAGaGtAGt-CCAAGG	3	7618114	-	4	1
RNA	GCAAAGCAAGTGAAGAACCANGG	GCAAAcCAAGTGtAc-AtCAAGG	3	10443828	-	4	1
RNA	GCAAAGCAAGTGAAGAACCANGG	GCAAAcCAAGTGtAcA-tCAAGG	3	10443828	-	4	1
RNA	GCAAAGCAAGTGAAGAACCANGG	cgAAAGCAgcTGAAG-ACCATGG	3	17145629	+	4	1
RNA	GCAAAGCAAGTGAAGAACCANGG	cgAAAGCAgcTGAAGA-CCATGG	3	17145629	+	4	1
RNA	GCAAAGCAAGTGAAGAACCANGG	GaAAAGCAAGaGAga-ACCAAGG	3	29494572	-	4	1
RNA	GCAAAGCAAGTGAAGAACCANGG	GaAAAGCAAGaGAgaA-CCAAGG	3	29494572	-	4	1
RNA	GCAAAGCAAGTGAAGAACCANGG	GaAAAGCAAGTGAAt-ttCACGG	3	45305915	+	4	1
RNA	GCAAAGCAAGTGAAGAACCANGG	GaAAAGCAAGTGAAtt-tCACGG	3	45305915	+	4	1
RNA	GCAAAGCAAGTGAAGAACCANGG	cCAAAaCAcaTGAAG-ACCAAGG	3	49233744	+	4	1
RNA	GCAAAGCAAGTGAAGAACCANGG	cCAAAaCAcaTGAAGA-CCAAGG	3	49233744	+	4	1
RNA	GCAAAGCAAGTGAAGAACCANGG	cCAAAaCAcaTGAAG-ACCAAGG	3	49234315	+	4	1
RNA	GCAAAGCAAGTGAAGAACCANGG	cCAAAaCAcaTGAAGA-CCAAGG	3	49234315	+	4	1
RNA	GCAAAGCAAGTGAAGAACCANGG	cgAAAGCAAcTaAA-AACCATGG	scaffold0505	6733	-	4	1
RNA	GCAAAGCAAGTGAAGAACCANGG	GtgAAGCAAaTGAA-AACgATGG	scaffold0231	9188	+	4	1
RNA	GCAAAGCAAGTGAAGAACCANGG	tgAAAGtAAGTGAA-AAtCATGG	scaffold0131	12327	+	4	1
RNA	GCAAAGCAAGTGAAGAACCANGG	agAAAGCAgGaGAA-AACCAGGG	scaffold0045	2235	+	4	1
RNA	GCAAAGCAAGTGAAGAACCANGG	GCAAAGaAAGaGAg-AACCtCGG	6	3122846	-	4	1
RNA	GCAAAGCAAGTGAAGAACCANGG	GCAAAGaAAaTcAA-AACtAAGG	6	8314596	+	4	1
RNA	GCAAAGCAAGTGAAGAACCANGG	GtgAAGCAtGTGAA-AAaCATGG	6	22554065	-	4	1
RNA	GCAAAGCAAGTGAAGAACCANGG	GCAAAGCAAactAA-AAgCAGGG	6	23631145	+	4	1
RNA	GCAAAGCAAGTGAAGAACCANGG	GgAAAGCAAGTcAA-AgaCATGG	6	24916239	+	4	1
RNA	GCAAAGCAAGTGAAGAACCANGG	agAAAGCAAGaGAg-AACCAAGG	6	25559015	+	4	1
RNA	GCAAAGCAAGTGAAGAACCANGG	GCAAAaCAAGTatA-AACaAAGG	6	30127931	-	4	1
RNA	GCAAAGCAAGTGAAGAACCANGG	GCAAAGCAAGTaAA-AAaagTGG	5	762907	+	4	1
RNA	GCAAAGCAAGTGAAGAACCANGG	tCAAAaCAAGTGcA-AACCtGGG	5	2717220	-	4	1
RNA	GCAAAGCAAGTGAAGAACCANGG	agAAAGCAAGaGAg-AACCAAGG	5	7507121	+	4	1
RNA	GCAAAGCAAGTGAAGAACCANGG	GaAAAaCAAGTGAA-AAaCcAGG	5	8376215	-	4	1
RNA	GCAAAGCAAGTGAAGAACCANGG	GgAAtGgAAGTGAA-gACCACGG	5	12245731	+	4	1
RNA	GCAAAGCAAGTGAAGAACCANGG	agAAAGCAAGaGAg-AACCAAGG	5	11996126	-	4	1
RNA	GCAAAGCAAGTGAAGAACCANGG	tgAAAGCtAGTGAA-AACCtTGG	5	18900228	+	4	1
RNA	GCAAAGCAAGTGAAGAACCANGG	agAAAGCAAGaGAg-AACCAAGG	5	20348126	-	4	1
RNA	GCAAAGCAAGTGAAGAACCANGG	agAAAGCAAGaGAg-AACCAAGG	5	20341522	-	4	1
RNA	GCAAAGCAAGTGAAGAACCANGG	GCAAAtCAtGTatA-AACCAAGG	5	29536359	-	4	1
RNA	GCAAAGCAAGTGAAGAACCANGG	GCAAAaCAAaTtAA-AAaCATGG	8	4810446	+	4	1
RNA	GCAAAGCAAGTGAAGAACCANGG	GtAAAGCAtGTGAt-AAaCACGG	8	9522593	-	4	1
RNA	GCAAAGCAAGTGAAGAACCANGG	cCAAAtCcAtTGAA-AACCACGG	8	10309307	+	4	1
RNA	GCAAAGCAAGTGAAGAACCANGG	aCAAAGaAAtTGAA-AAgCAGGG	8	14019188	-	4	1
RNA	GCAAAGCAAGTGAAGAACCANGG	agAAAGCAAGaGAg-AACCAAGG	8	23748648	-	4	1
RNA	GCAAAGCAAGTGAAGAACCANGG	agAAAGCAAGaGAg-AACCAAGG	8	26485087	+	4	1
RNA	GCAAAGCAAGTGAAGAACCANGG	GCAgAGCAAGTGAA-AgggAAGG	8	29359975	-	4	1
RNA	GCAAAGCAAGTGAAGAACCANGG	GCAAcGaAcGTGAA-AtCCATGG	8	38864928	+	4	1
RNA	GCAAAGCAAGTGAAGAACCANGG	GCAAAGaAAcTGgA-AACaATGG	2	1830536	-	4	1
RNA	GCAAAGCAAGTGAAGAACCANGG	tCAAAGaAAGTGAt-AACaAGGG	2	3305381	-	4	1
RNA	GCAAAGCAAGTGAAGAACCANGG	GCAAtGgAAGaGAA-AACgACGG	2	4798037	-	4	1
RNA	GCAAAGCAAGTGAAGAACCANGG	GaAAAGaAAaTGAA-AACaAAGG	2	12215137	-	4	1
RNA	GCAAAGCAAGTGAAGAACCANGG	GCAAAGCAAGTctt-cACCATGG	2	23242969	+	4	1
RNA	GCAAAGCAAGTGAAGAACCANGG	GCAAAGCcAcTGAt-AACCgAGG	2	28801081	-	4	1
RNA	GCAAAGCAAGTGAAGAACCANGG	GCAAAGCAAGTaAA-AAaagTGG	2	31133658	-	4	1
RNA	GCAAAGCAAGTGAAGAACCANGG	agAAAGCAAGaGAg-AACCAAGG	2	31829642	-	4	1
RNA	GCAAAGCAAGTGAAGAACCANGG	agAAAGCAAGaGAg-AACCAAGG	2	31834994	-	4	1
RNA	GCAAAGCAAGTGAAGAACCANGG	GaAAAaaAAGTGAA-AAaCATGG	2	34500559	+	4	1
RNA	GCAAAGCAAGTGAAGAACCANGG	GaAAtGgAAGTGAA-AACtAGGG	2	37721898	+	4	1
RNA	GCAAAGCAAGTGAAGAACCANGG	atAAAGCActTGAA-AACCATGG	2	40399125	+	4	1
RNA	GCAAAGCAAGTGAAGAACCANGG	cCAAAGgAcGTGgA-AACCAAGG	2	41158870	+	4	1
RNA	GCAAAGCAAGTGAAGAACCANGG	GCAAAGCAAtaGAA-AACatGGG	7	10371428	-	4	1
RNA	GCAAAGCAAGTGAAGAACCANGG	GaAAAGaAAGTGAA-AAtaATGG	7	10936329	+	4	1
RNA	GCAAAGCAAGTGAAGAACCANGG	GgAAAaCAAGaGAg-AACCAGGG	7	13452914	+	4	1
RNA	GCAAAGCAAGTGAAGAACCANGG	GCAAgcCAgtTGAA-AACCAGGG	7	15444060	-	4	1
RNA	GCAAAGCAAGTGAAGAACCANGG	GCAAgcCAgtTGAA-AACCAGGG	7	15508842	-	4	1
RNA	GCAAAGCAAGTGAAGAACCANGG	GCAAAcaAAtTGAA-AACtATGG	7	27551317	+	4	1
RNA	GCAAAGCAAGTGAAGAACCANGG	GgAAAttAAGTGAA-AACtAGGG	7	30478810	-	4	1
RNA	GCAAAGCAAGTGAAGAACCANGG	GCAAAGtActTGAA-AAtCATGG	7	33957754	+	4	1
RNA	GCAAAGCAAGTGAAGAACCANGG	agAAAGCAAGaGAg-AACCAAGG	7	37288502	-	4	1
RNA	GCAAAGCAAGTGAAGAACCANGG	agAAAGCAAGaGAg-AACCAAGG	7	46650740	-	4	1
RNA	GCAAAGCAAGTGAAGAACCANGG	agAcAGCAAtTGAA-AACCAGGG	1	2608973	-	4	1
RNA	GCAAAGCAAGTGAAGAACCANGG	GtAAAGCAAactAA-AACCAAGG	1	4772940	+	4	1
RNA	GCAAAGCAAGTGAAGAACCANGG	aCAAAaCAAtTtAA-AACCATGG	1	5332686	+	4	1
RNA	GCAAAGCAAGTGAAGAACCANGG	aCAAAaCAAtTtAA-AACCATGG	1	5350405	+	4	1
RNA	GCAAAGCAAGTGAAGAACCANGG	GtAAAaCAAtaGAA-AACCATGG	1	5508008	-	4	1
RNA	GCAAAGCAAGTGAAGAACCANGG	GCAAAGtttGTGAA-AACaAAGG	1	9367490	+	4	1
RNA	GCAAAGCAAGTGAAGAACCANGG	GCAAAGCAtaTGAA-AAttAGGG	1	9508627	-	4	1
RNA	GCAAAGCAAGTGAAGAACCANGG	GaAAAcCAAtTGtA-AACCAAGG	1	16245149	+	4	1
RNA	GCAAAGCAAGTGAAGAACCANGG	GgAgAGCAgGTGAA-AAaCATGG	1	17319883	-	4	1
RNA	GCAAAGCAAGTGAAGAACCANGG	agAAAGCAAGaGAg-AACCAAGG	1	20300343	-	4	1
RNA	GCAAAGCAAGTGAAGAACCANGG	agAAAGCAAGaGAg-AACCAAGG	1	20293712	-	4	1
RNA	GCAAAGCAAGTGAAGAACCANGG	GaAAAGCAAcTtAA-AACtAAGG	1	24624522	+	4	1
RNA	GCAAAGCAAGTGAAGAACCANGG	GaAgAtCAAGTtAA-AACCAAGG	1	24912457	-	4	1
RNA	GCAAAGCAAGTGAAGAACCANGG	GCAAAGCAAGTaAA-AAaagTGG	1	25817932	-	4	1
RNA	GCAAAGCAAGTGAAGAACCANGG	aCAAAtgAAGTGAA-AcCCAAGG	1	27142030	-	4	1
RNA	GCAAAGCAAGTGAAGAACCANGG	GCAAAGatAGTGAA-AttCAAGG	1	29590079	-	4	1
RNA	GCAAAGCAAGTGAAGAACCANGG	tCcAAGCAAGTGAA-gtCCATGG	1	33115800	-	4	1
RNA	GCAAAGCAAGTGAAGAACCANGG	GCAAAGCAAaTaAA-AAaaAAGG	1	37242555	-	4	1
RNA	GCAAAGCAAGTGAAGAACCANGG	GaAAAtCAAtTGAA-AcCCACGG	1	42098104	-	4	1
RNA	GCAAAGCAAGTGAAGAACCANGG	GaAAAGCAAtTGtt-AACCATGG	1	48258657	+	4	1
RNA	GCAAAGCAAGTGAAGAACCANGG	GCAAAaCAAaTGtA-AAaCATGG	1	52237373	-	4	1
RNA	GCAAAGCAAGTGAAGAACCANGG	tgAAAGCAtaTGAA-AACCACGG	1	52477821	-	4	1
RNA	GCAAAGCAAGTGAAGAACCANGG	ttAAAGaAAGTGAA-AgCCATGG	3	2574888	+	4	1
RNA	GCAAAGCAAGTGAAGAACCANGG	tCAAAaCAAGTGAt-AAaCAGGG	3	4649325	+	4	1
RNA	GCAAAGCAAGTGAAGAACCANGG	GCAAAGCtAGTGAA-gAaCcTGG	3	6026743	+	4	1
RNA	GCAAAGCAAGTGAAGAACCANGG	GCAAAcCAAGTGtA-cAtCAAGG	3	10443828	-	4	1
RNA	GCAAAGCAAGTGAAGAACCANGG	GCAAAtCgAaTGAA-AACaAGGG	3	16926543	+	4	1
RNA	GCAAAGCAAGTGAAGAACCANGG	GagAAGCAAGaGAg-AACCAAGG	3	19343376	+	4	1
RNA	GCAAAGCAAGTGAAGAACCANGG	GCAAAatAAGTaAg-AACCATGG	3	20690660	+	4	1
RNA	GCAAAGCAAGTGAAGAACCANGG	GaAAAGaAAGTGAA-AgCaAAGG	3	30506697	+	4	1
RNA	GCAAAGCAAGTGAAGAACCANGG	GaAAtGaAAGTGAA-AACaAAGG	3	30522096	+	4	1
RNA	GCAAAGCAAGTGAAGAACCANGG	GatAAGgAAGTGAA-AgCCAAGG	3	40481067	+	4	1
RNA	GCAAAGCAAGTGAAGAACCANGG	GaAAAGagAGTGAA-AAtCACGG	3	41584373	+	4	1
RNA	GCAAAGCAAGTGAAGAACCANGG	GCAAAtCAgGTGAA-AACagAGG	3	43618427	+	4	1
RNA	GCAAAGCAAGTGAAGAACCANGG	GCAAAtCAgGTGAA-AACagAGG	3	43611422	+	4	1
RNA	GCAAAGCAAGTGAAGAACCANGG	GCAAAGCAttTGAA-AtCaACGG	3	44715353	-	4	1
RNA	GCAAAGCAAGTGAAGAACCANGG	GaAAAGCAAGTGAA-tttCACGG	3	45305915	+	4	1
RNA	GCAAAGCAAGTGAAGAACCANGG	GCAAAGgcAGgGAA-AtCCAAGG	3	48624435	-	4	1
RNA	GCAAAGCAAGTGAAGAACCANGG	agAAAaCAAGaGAA-AACCAGGG	3	50141869	+	4	1
RNA	GCAAAGCAAGTGAAGAACCANGG	tCAAAGCAAaTtAA-AACgAAGG	3	52705438	+	4	1
RNA	GCAAAGCAAGTGAAGAACCANGG	agAAAGCAAGaGAg-AACCAAGG	4	1584892	-	4	1
RNA	GCAAAGCAAGTGAAGAACCANGG	GCAgAGCAAcTtAg-AACCAAGG	4	5939899	-	4	1
RNA	GCAAAGCAAGTGAAGAACCANGG	aCAAA-CAAtTGAAGAAtaAAGG	scaffold0281	10521	-	4	1
RNA	GCAAAGCAAGTGAAGAACCANGG	GgcAA-CAAtTGAAGAAaCATGG	scaffold0010	119070	-	4	1
RNA	GCAAAGCAAGTGAAGAACCANGG	ctAAA-aAAGTGAAcAACCAAGG	scaffold0002	349204	+	4	1
RNA	GCAAAGCAAGTGAAGAACCANGG	GagAA-tAAGTGAAtAACCATGG	6	76798	-	4	1
RNA	GCAAAGCAAGTGAAGAACCANGG	GtAAA-tgAGTGAAGAAaCAAGG	6	3601724	+	4	1
RNA	GCAAAGCAAGTGAAGAACCANGG	GCAAA-aAAGTGAAGctaCATGG	6	6410103	-	4	1
RNA	GCAAAGCAAGTGAAGAACCANGG	cCAAA-aAAGaGAAGAAaCAAGG	6	8698965	+	4	1
RNA	GCAAAGCAAGTGAAGAACCANGG	GCAAA-CAAtTGtgaAACCATGG	6	16295708	+	4	1
RNA	GCAAAGCAAGTGAAGAACCANGG	aaAAA-CAAGTttAGAACCATGG	6	24290486	+	4	1
RNA	GCAAAGCAAGTGAAGAACCANGG	GCAAA-gAAGTGAAGAtCagAGG	6	30490468	+	4	1
RNA	GCAAAGCAAGTGAAGAACCANGG	GCAAA-CAAtTcAAGAAaaAAGG	6	31619170	+	4	1
RNA	GCAAAGCAAGTGAAGAACCANGG	GaAAA-CAAtTcAAGAAaCATGG	6	33977982	-	4	1
RNA	GCAAAGCAAGTGAAGAACCANGG	GtAAA-CAAaTGAAGcAaCATGG	5	14918183	+	4	1
RNA	GCAAAGCAAGTGAAGAACCANGG	GacAt-CAAGTGAAGAAtCAAGG	5	19763833	-	4	1
RNA	GCAAAGCAAGTGAAGAACCANGG	aCAcA-CAAGTGAAGAAaCcGGG	5	24638023	-	4	1
RNA	GCAAAGCAAGTGAAGAACCANGG	GCAAt-CAgGTGAAaAAtCACGG	5	40238955	+	4	1
RNA	GCAAAGCAAGTGAAGAACCANGG	GgggA-CAAGcGAAGAACCAAGG	5	43409839	+	4	1
RNA	GCAAAGCAAGTGAAGAACCANGG	caAAA-CAcGTGAAtAACCACGG	8	1802412	+	4	1
RNA	GCAAAGCAAGTGAAGAACCANGG	GgAAA-CAAGTGAtGAAtCtAGG	8	2057888	+	4	1
RNA	GCAAAGCAAGTGAAGAACCANGG	aCAAA-CAAGaGAAaAACtAAGG	8	3738933	-	4	1
RNA	GCAAAGCAAGTGAAGAACCANGG	GacAA-CAAGTGAtGAAtCAGGG	8	11673802	-	4	1
RNA	GCAAAGCAAGTGAAGAACCANGG	GCcAA-CAAGaGAAGAAatAAGG	8	12291316	-	4	1
RNA	GCAAAGCAAGTGAAGAACCANGG	aCAAA-aAAGTGtAGAAgCATGG	8	12567944	-	4	1
RNA	GCAAAGCAAGTGAAGAACCANGG	GCAAA-CAAGgGAgtgACCAGGG	8	16016608	+	4	1
RNA	GCAAAGCAAGTGAAGAACCANGG	GCAAt-CAtGTGtAGAACCtAGG	8	23958234	+	4	1
RNA	GCAAAGCAAGTGAAGAACCANGG	taAAA-CAAGTcAAGAACCtTGG	8	27072189	+	4	1
RNA	GCAAAGCAAGTGAAGAACCANGG	GtAAA-tAAGTGAAGAAggAAGG	8	26848986	-	4	1
RNA	GCAAAGCAAGTGAAGAACCANGG	GtAAA-tAAGTGAAGAAtgAAGG	8	26845775	-	4	1
RNA	GCAAAGCAAGTGAAGAACCANGG	GtAAA-CAAGTcAAGAAagAAGG	8	36713030	-	4	1
RNA	GCAAAGCAAGTGAAGAACCANGG	cCAAA-CtAGTGAAGAACatTGG	8	37830985	+	4	1
RNA	GCAAAGCAAGTGAAGAACCANGG	taAAA-CAAGgGAAGAtCCAGGG	2	3146179	-	4	1
RNA	GCAAAGCAAGTGAAGAACCANGG	GCtAA-CAAGTcAAGttCCAGGG	2	9603697	-	4	1
RNA	GCAAAGCAAGTGAAGAACCANGG	GCAAc-CAAGTtcAGAAaCAAGG	2	18660986	+	4	1
RNA	GCAAAGCAAGTGAAGAACCANGG	GCAAA-aAAGTGAgaAAgCAAGG	2	24395585	+	4	1
RNA	GCAAAGCAAGTGAAGAACCANGG	aaAAA-CAAGTGAAGAAaaAAGG	2	24183715	-	4	1
RNA	GCAAAGCAAGTGAAGAACCANGG	GaAAA-CAAtTcAAGAAaCATGG	2	28608287	-	4	1
RNA	GCAAAGCAAGTGAAGAACCANGG	aCAAA-CAAtTGAAGAAtaAAGG	2	31861038	-	4	1
RNA	GCAAAGCAAGTGAAGAACCANGG	GaAAA-CAAGTGAAcAAatAAGG	2	41511166	+	4	1
RNA	GCAAAGCAAGTGAAGAACCANGG	GCAAt-CAAtTGAAGctCCAAGG	2	41267659	-	4	1
RNA	GCAAAGCAAGTGAAGAACCANGG	GaAAA-CAAcTGtAGAAtCAAGG	7	63877	+	4	1
RNA	GCAAAGCAAGTGAAGAACCANGG	ttAAA-CAAGTGAAaAACtAAGG	7	3326269	+	4	1
RNA	GCAAAGCAAGTGAAGAACCANGG	cCcAA-gcAGTGAAGAACCATGG	7	6321200	+	4	1
RNA	GCAAAGCAAGTGAAGAACCANGG	aaAcA-CAAGTGAAGgACCATGG	7	7282145	-	4	1
RNA	GCAAAGCAAGTGAAGAACCANGG	GCtAA-CctGTGAAGAtCCAAGG	7	22022473	-	4	1
RNA	GCAAAGCAAGTGAAGAACCANGG	GCAAc-CAAGTtcAGAAgCAAGG	7	26348770	-	4	1
RNA	GCAAAGCAAGTGAAGAACCANGG	GCAAc-CAAGTtcAGAAgCAAGG	7	26363790	-	4	1
RNA	GCAAAGCAAGTGAAGAACCANGG	GCgAA-aAAGTGAAGAAaaATGG	7	29338425	+	4	1
RNA	GCAAAGCAAGTGAAGAACCANGG	GaAAA-CAtGTGAtGAAtCAGGG	7	31989345	-	4	1
RNA	GCAAAGCAAGTGAAGAACCANGG	GCAAA-CAttaGAAGAtCCATGG	7	32996092	+	4	1
RNA	GCAAAGCAAGTGAAGAACCANGG	GtAAA-CAtGTGAAGAAaaACGG	7	33359358	-	4	1
RNA	GCAAAGCAAGTGAAGAACCANGG	GCAAA-CAgtTGAAaAACaACGG	7	37735184	-	4	1
RNA	GCAAAGCAAGTGAAGAACCANGG	cCAcA-CAAtTGAAGAtCCAAGG	7	44575945	-	4	1
RNA	GCAAAGCAAGTGAAGAACCANGG	GgAAA-CttGTGAAGAAgCAAGG	7	46956833	-	4	1
RNA	GCAAAGCAAGTGAAGAACCANGG	GCtAA-CAtGTGAAGAAagAAGG	1	5187560	-	4	1
RNA	GCAAAGCAAGTGAAGAACCANGG	GatAA-CAtGTGAAGAAtCATGG	1	10977419	+	4	1
RNA	GCAAAGCAAGTGAAGAACCANGG	GCAAA-CgAGatAAGAACCgTGG	1	12492469	+	4	1
RNA	GCAAAGCAAGTGAAGAACCANGG	GgAAA-CtAGTGAAGtACaAAGG	1	14181940	-	4	1
RNA	GCAAAGCAAGTGAAGAACCANGG	tCAAg-CAtGTGAAGAAtCACGG	1	16121348	+	4	1
RNA	GCAAAGCAAGTGAAGAACCANGG	GaAAA-aAAGgGAAGAACaAAGG	1	25832943	+	4	1
RNA	GCAAAGCAAGTGAAGAACCANGG	GtAAc-CAAGTGAAGgAtCAGGG	1	32793802	-	4	1
RNA	GCAAAGCAAGTGAAGAACCANGG	GCAAA-CAAtTcAAGAtCgACGG	1	43483102	+	4	1
RNA	GCAAAGCAAGTGAAGAACCANGG	tCAAA-aAAtTGAAaAACCATGG	1	46811808	+	4	1
RNA	GCAAAGCAAGTGAAGAACCANGG	aCcAA-CAAtTGAAGAAaCACGG	1	50734388	+	4	1
RNA	GCAAAGCAAGTGAAGAACCANGG	GCAAA-aAAGTaAgcAACCAGGG	1	51072572	+	4	1
RNA	GCAAAGCAAGTGAAGAACCANGG	aCAcA-CAAGTGAAGAAaCcGGG	1	52492717	+	4	1
RNA	GCAAAGCAAGTGAAGAACCANGG	GCAAA-CAAtTtAAGAtCaACGG	3	1315723	+	4	1
RNA	GCAAAGCAAGTGAAGAACCANGG	GaAAA-CAAGTGAAGAcaaAAGG	3	3267877	+	4	1
RNA	GCAAAGCAAGTGAAGAACCANGG	GCAAA-CAAGgtAAcAACaAAGG	3	7257814	+	4	1
RNA	GCAAAGCAAGTGAAGAACCANGG	GtAAt-CAAGTcAAGAACgATGG	3	9169976	-	4	1
RNA	GCAAAGCAAGTGAAGAACCANGG	ttAAt-CAAGTGAtGAACCAAGG	3	9648062	-	4	1
RNA	GCAAAGCAAGTGAAGAACCANGG	GCAtA-CAAGTGAAGtAaCcGGG	3	12405632	-	4	1
RNA	GCAAAGCAAGTGAAGAACCANGG	cCAAA-aAAGaGAAGAAaCAAGG	3	20597966	+	4	1
RNA	GCAAAGCAAGTGAAGAACCANGG	GaAAc-CAcGTGAAGAAtCAAGG	3	21653495	+	4	1
RNA	GCAAAGCAAGTGAAGAACCANGG	GgAAA-gAAcTGAAGAAgCATGG	3	22158194	-	4	1
RNA	GCAAAGCAAGTGAAGAACCANGG	GCAAA-CAAaaGAgGAACCgGGG	3	26395234	+	4	1
RNA	GCAAAGCAAGTGAAGAACCANGG	GCAAA-gAAaTGAgGgACCATGG	3	28526209	+	4	1
RNA	GCAAAGCAAGTGAAGAACCANGG	GacAA-CAAtTtAAGAACCATGG	3	31370221	+	4	1
RNA	GCAAAGCAAGTGAAGAACCANGG	cCAAA-CAAGTGAAGAAtatTGG	3	33188371	+	4	1
RNA	GCAAAGCAAGTGAAGAACCANGG	tCcAA-tAAGTGAAGAACCtTGG	3	34759428	+	4	1
RNA	GCAAAGCAAGTGAAGAACCANGG	cCAAA-tgAGTGAAGAACtATGG	3	36917024	+	4	1
RNA	GCAAAGCAAGTGAAGAACCANGG	GCAtA-CAAGTGAAGAgCtgTGG	3	44948994	+	4	1
RNA	GCAAAGCAAGTGAAGAACCANGG	GCAAA-CtAGactAGAACCATGG	4	2426287	-	4	1
RNA	GCAAAGCAAGTGAAGAACCANGG	GacAA-CAAGTGAtGAAtCAAGG	4	4765458	-	4	1
RNA	GCAAAGCAAGTGAAGAACCANGG	GCAAA-CAAcTcAAccACCACGG	4	5840948	+	4	1
X	GCAAAGCAAGTGAAGAACCANGG	GCAtAGgAAcTGAAGAACtAAGG	scaffold0561	647	+	4	0
X	GCAAAGCAAGTGAAGAACCANGG	GCAtAGgAAtTGAAGAACtAGGG	scaffold0125	6405	+	4	0
X	GCAAAGCAAGTGAAGAACCANGG	tCAcAGCAAGTGtAaAACCATGG	6	164208	-	4	0
X	GCAAAGCAAGTGAAGAACCANGG	GCAtAGgAAtTGAAGAACtAGGG	6	16598697	+	4	0
X	GCAAAGCAAGTGAAGAACCANGG	GCAtAGgAAtTGAAGAACtAGGG	5	23274191	-	4	0
X	GCAAAGCAAGTGAAGAACCANGG	GCAtAGgAAtTGAAGAACtAAGG	5	29831256	-	4	0
X	GCAAAGCAAGTGAAGAACCANGG	tCAAAGCAAtTGAAaAAtCAAGG	5	40409194	+	4	0
X	GCAAAGCAAGTGAAGAACCANGG	tCAAAGCAAtTGAAaAAtCAAGG	5	40362452	+	4	0
X	GCAAAGCAAGTGAAGAACCANGG	cCAAAGCAgGaGtAGAACCACGG	5	42720512	-	4	0
X	GCAAAGCAAGTGAAGAACCANGG	tCAAAaCAcGTGAAtAACCACGG	8	1802411	+	4	0
X	GCAAAGCAAGTGAAGAACCANGG	GgAAAGtAAGaGAAGAACaAAGG	8	12849893	-	4	0
X	GCAAAGCAAGTGAAGAACCANGG	GCAAtGCAAcTGAtGAAgCAAGG	8	32291904	+	4	0
X	GCAAAGCAAGTGAAGAACCANGG	GCAAAaCAAGaaAAGAACtATGG	8	43724944	+	4	0
X	GCAAAGCAAGTGAAGAACCANGG	cCAAAGCtAGTGcAGcACCAAGG	2	6552267	-	4	0
X	GCAAAGCAAGTGAAGAACCANGG	GCAtAGgAAtTGAAGAAtCAGGG	7	10203545	-	4	0
X	GCAAAGCAAGTGAAGAACCANGG	GCAtAGgAAtTGAAGAACtAGGG	7	19335519	-	4	0
X	GCAAAGCAAGTGAAGAACCANGG	GgAtAGCAAGaGAtGAACCACGG	7	39222543	+	4	0
X	GCAAAGCAAGTGAAGAACCANGG	GCAAtaCAtGTGAAGAAaCAAGG	1	12629087	-	4	0
X	GCAAAGCAAGTGAAGAACCANGG	tCAAtGaAAGaGAAGAACCAAGG	1	13074669	-	4	0
X	GCAAAGCAAGTGAAGAACCANGG	aCAAtGCAAGTGttGAACCATGG	1	15447031	+	4	0
X	GCAAAGCAAGTGAAGAACCANGG	GCAtAGgAAtTGAAGAACtAGGG	1	17317385	-	4	0
X	GCAAAGCAAGTGAAGAACCANGG	GCtAAGgtgGTGAAGAACCATGG	3	1121602	+	4	0
X	GCAAAGCAAGTGAAGAACCANGG	GttAAtCAAGTGAtGAACCAAGG	3	9648062	-	4	0
X	GCAAAGCAAGTGAAGAACCANGG	GCAAAGaAAGgtAAGAACCgCGG	3	11484949	+	4	0
X	GCAAAGCAAGTGAAGAACCANGG	GCAtAGgAAtTGAAGAACtAAGG	3	14889475	-	4	0
X	GCAAAGCAAGTGAAGAACCANGG	GgAAAGaAAtTaAAGAACCAAGG	3	20002428	-	4	0
X	GCAAAGCAAGTGAAGAACCANGG	GaAAAGaAAagGAAGAACCAGGG	3	40990559	-	4	0
X	GCAAAGCAAGTGAAGAACCANGG	GgAAAGaAAGTGAAtAAgCAAGG	4	7918908	+	4	0
RNA	GCAAAGCAAGTGAAGAACCANGG	GCAtAGgAAtTGAAGAA-CtAGG	scaffold0125	6405	+	4	1
RNA	GCAAAGCAAGTGAAGAACCANGG	GCAtAGgAAtTGAAGAAC-tAGG	scaffold0125	6405	+	4	1
RNA	GCAAAGCAAGTGAAGAACCANGG	GCAtAGgAAtTGAAGAA-CcAGG	scaffold0032	70628	+	4	1
RNA	GCAAAGCAAGTGAAGAACCANGG	GCAtAGgAAtTGAAGAAC-cAGG	scaffold0032	70628	+	4	1
RNA	GCAAAGCAAGTGAAGAACCANGG	GCggAGCAAGcGAAGAA-tAAGG	scaffold0033	68980	-	4	1
RNA	GCAAAGCAAGTGAAGAACCANGG	GCggAGCAAGcGAAGAAt-AAGG	scaffold0033	68980	-	4	1
RNA	GCAAAGCAAGTGAAGAACCANGG	GaAAAaCAAagGAAGAA-CAGGG	6	1055841	-	4	1
RNA	GCAAAGCAAGTGAAGAACCANGG	GaAAAaCAAagGAAGAAC-AGGG	6	1055841	-	4	1
RNA	GCAAAGCAAGTGAAGAACCANGG	GacAAGCAAcTGAAGAA-gAGGG	6	7581883	+	4	1
RNA	GCAAAGCAAGTGAAGAACCANGG	GacAAGCAAcTGAAGAAg-AGGG	6	7581883	+	4	1
RNA	GCAAAGCAAGTGAAGAACCANGG	tCAAAaCAAGTGAAGAg-gATGG	6	8434871	+	4	1
RNA	GCAAAGCAAGTGAAGAACCANGG	tCAAAaCAAGTGAAGAgg-ATGG	6	8434871	+	4	1
RNA	GCAAAGCAAGTGAAGAACCANGG	GCAAAGaAAcTcAAGAA-aATGG	6	10025452	+	4	1
RNA	GCAAAGCAAGTGAAGAACCANGG	GCAAAGaAAcTcAAGAAa-ATGG	6	10025452	+	4	1
RNA	GCAAAGCAAGTGAAGAACCANGG	GgAAAaCgAGTGAAGAA-gAAGG	6	15838166	-	4	1
RNA	GCAAAGCAAGTGAAGAACCANGG	GgAAAaCgAGTGAAGAAg-AAGG	6	15838166	-	4	1
RNA	GCAAAGCAAGTGAAGAACCANGG	GCAtAGgAAtTGAAGAA-CtAGG	6	16598697	+	4	1
RNA	GCAAAGCAAGTGAAGAACCANGG	GCAtAGgAAtTGAAGAAC-tAGG	6	16598697	+	4	1
RNA	GCAAAGCAAGTGAAGAACCANGG	GtgAAGCAtGTGAAaAA-CATGG	6	22554065	-	4	1
RNA	GCAAAGCAAGTGAAGAACCANGG	GtgAAGCAtGTGAAaAAC-ATGG	6	22554065	-	4	1
RNA	GCAAAGCAAGTGAAGAACCANGG	GCAttGgAAGTGtAGAA-CAAGG	6	24259454	-	4	1
RNA	GCAAAGCAAGTGAAGAACCANGG	GCAttGgAAGTGtAGAAC-AAGG	6	24259454	-	4	1
RNA	GCAAAGCAAGTGAAGAACCANGG	GgAAAGCAAGTcAAagA-CATGG	6	24916239	+	4	1
RNA	GCAAAGCAAGTGAAGAACCANGG	GgAAAGCAAGTcAAagAC-ATGG	6	24916239	+	4	1
RNA	GCAAAGCAAGTGAAGAACCANGG	aCAAAaCAAGgGAAGAt-CAAGG	6	24935701	-	4	1
RNA	GCAAAGCAAGTGAAGAACCANGG	aCAAAaCAAGgGAAGAtC-AAGG	6	24935701	-	4	1
RNA	GCAAAGCAAGTGAAGAACCANGG	GacAAGaAAGTaAAGAA-CACGG	6	29255088	-	4	1
RNA	GCAAAGCAAGTGAAGAACCANGG	GacAAGaAAGTaAAGAAC-ACGG	6	29255088	-	4	1
RNA	GCAAAGCAAGTGAAGAACCANGG	aCcAAGaAAGTGAAGcA-CAAGG	6	29753553	-	4	1
RNA	GCAAAGCAAGTGAAGAACCANGG	aCcAAGaAAGTGAAGcAC-AAGG	6	29753553	-	4	1
RNA	GCAAAGCAAGTGAAGAACCANGG	aCcAAGaAAGTGAAGcA-CACGG	6	29766211	-	4	1
RNA	GCAAAGCAAGTGAAGAACCANGG	aCcAAGaAAGTGAAGcAC-ACGG	6	29766211	-	4	1
RNA	GCAAAGCAAGTGAAGAACCANGG	GaAAAGCAtGacAAGAA-CAAGG	6	31691947	-	4	1
RNA	GCAAAGCAAGTGAAGAACCANGG	GaAAAGCAtGacAAGAAC-AAGG	6	31691947	-	4	1
RNA	GCAAAGCAAGTGAAGAACCANGG	GCAAAGCAAGTaAAaAA-agTGG	5	762907	+	4	1
RNA	GCAAAGCAAGTGAAGAACCANGG	GCAAAGCAAGTaAAaAAa-gTGG	5	762907	+	4	1
RNA	GCAAAGCAAGTGAAGAACCANGG	GaAAAaCAAGTGAAaAA-CcAGG	5	8376215	-	4	1
RNA	GCAAAGCAAGTGAAGAACCANGG	GaAAAaCAAGTGAAaAAC-cAGG	5	8376215	-	4	1
RNA	GCAAAGCAAGTGAAGAACCANGG	GCAAtGCAAGTaAgGAA-tATGG	5	9990395	+	4	1
RNA	GCAAAGCAAGTGAAGAACCANGG	GCAAtGCAAGTaAgGAAt-ATGG	5	9990395	+	4	1
RNA	GCAAAGCAAGTGAAGAACCANGG	cCAAAtaAAaTGAAGAA-CAAGG	5	11735855	-	4	1
RNA	GCAAAGCAAGTGAAGAACCANGG	cCAAAtaAAaTGAAGAAC-AAGG	5	11735855	-	4	1
RNA	GCAAAGCAAGTGAAGAACCANGG	GgAAtGgAAGTGAAGAc-CACGG	5	12245731	+	4	1
RNA	GCAAAGCAAGTGAAGAACCANGG	GgAAtGgAAGTGAAGAcC-ACGG	5	12245731	+	4	1
RNA	GCAAAGCAAGTGAAGAACCANGG	GCAAAtCAAGTGAtGAA-ggAGG	5	14417407	+	4	1
RNA	GCAAAGCAAGTGAAGAACCANGG	GCAAAtCAAGTGAtGAAg-gAGG	5	14417407	+	4	1
RNA	GCAAAGCAAGTGAAGAACCANGG	GCAAAGaAAaaGAAGAA-tAGGG	5	23128656	+	4	1
RNA	GCAAAGCAAGTGAAGAACCANGG	GCAAAGaAAaaGAAGAAt-AGGG	5	23128656	+	4	1
RNA	GCAAAGCAAGTGAAGAACCANGG	GCAtAGgAAtTGAAGAA-CtAGG	5	23274192	-	4	1
RNA	GCAAAGCAAGTGAAGAACCANGG	GCAtAGgAAtTGAAGAAC-tAGG	5	23274192	-	4	1
RNA	GCAAAGCAAGTGAAGAACCANGG	GtgAAGaAgGTGAAGAA-CAAGG	5	30373044	-	4	1
RNA	GCAAAGCAAGTGAAGAACCANGG	GtgAAGaAgGTGAAGAAC-AAGG	5	30373044	-	4	1
RNA	GCAAAGCAAGTGAAGAACCANGG	GCAAAtCcAtTGAAGAt-CATGG	5	40025688	-	4	1
RNA	GCAAAGCAAGTGAAGAACCANGG	GCAAAtCcAtTGAAGAtC-ATGG	5	40025688	-	4	1
RNA	GCAAAGCAAGTGAAGAACCANGG	GCAAAaCAAaTtAAaAA-CATGG	8	4810446	+	4	1
RNA	GCAAAGCAAGTGAAGAACCANGG	GCAAAaCAAaTtAAaAAC-ATGG	8	4810446	+	4	1
RNA	GCAAAGCAAGTGAAGAACCANGG	GtgAAcCAAGTGAAGAA-CtTGG	8	6905011	+	4	1
RNA	GCAAAGCAAGTGAAGAACCANGG	GtgAAcCAAGTGAAGAAC-tTGG	8	6905011	+	4	1
RNA	GCAAAGCAAGTGAAGAACCANGG	GtAAAGCAAGacAAcAA-CATGG	8	6951712	+	4	1
RNA	GCAAAGCAAGTGAAGAACCANGG	GtAAAGCAAGacAAcAAC-ATGG	8	6951712	+	4	1
RNA	GCAAAGCAAGTGAAGAACCANGG	GCgAAGaAAGTaAtGAA-CATGG	8	7170235	+	4	1
RNA	GCAAAGCAAGTGAAGAACCANGG	GCgAAGaAAGTaAtGAAC-ATGG	8	7170235	+	4	1
RNA	GCAAAGCAAGTGAAGAACCANGG	GCAgAGCctGTGAtGAA-CACGG	8	8765048	+	4	1
RNA	GCAAAGCAAGTGAAGAACCANGG	GCAgAGCctGTGAtGAAC-ACGG	8	8765048	+	4	1
RNA	GCAAAGCAAGTGAAGAACCANGG	GtAAAGCAtGTGAtaAA-CACGG	8	9522593	-	4	1
RNA	GCAAAGCAAGTGAAGAACCANGG	GtAAAGCAtGTGAtaAAC-ACGG	8	9522593	-	4	1
RNA	GCAAAGCAAGTGAAGAACCANGG	GCAAtGgAAGTGAAGAg-gAAGG	8	15945820	+	4	1
RNA	GCAAAGCAAGTGAAGAACCANGG	GCAAtGgAAGTGAAGAgg-AAGG	8	15945820	+	4	1
RNA	GCAAAGCAAGTGAAGAACCANGG	GCAtAGgAAtTGAAGAA-CtGGG	8	16647903	-	4	1
RNA	GCAAAGCAAGTGAAGAACCANGG	GCAtAGgAAtTGAAGAAC-tGGG	8	16647903	-	4	1
RNA	GCAAAGCAAGTGAAGAACCANGG	GCAAAGCtgGTGgAtAA-CACGG	8	16968746	-	4	1
RNA	GCAAAGCAAGTGAAGAACCANGG	GCAAAGCtgGTGgAtAAC-ACGG	8	16968746	-	4	1
RNA	GCAAAGCAAGTGAAGAACCANGG	GCAAttgAAGTGAAGAA-aATGG	8	22584243	-	4	1
RNA	GCAAAGCAAGTGAAGAACCANGG	GCAAttgAAGTGAAGAAa-ATGG	8	22584243	-	4	1
RNA	GCAAAGCAAGTGAAGAACCANGG	GaAAAGgActTGAAGAA-CAAGG	8	25122848	-	4	1
RNA	GCAAAGCAAGTGAAGAACCANGG	GaAAAGgActTGAAGAAC-AAGG	8	25122848	-	4	1
RNA	GCAAAGCAAGTGAAGAACCANGG	GCAAAGaAAtTGAAGcA-CtTGG	8	29250632	-	4	1
RNA	GCAAAGCAAGTGAAGAACCANGG	GCAAAGaAAtTGAAGcAC-tTGG	8	29250632	-	4	1
RNA	GCAAAGCAAGTGAAGAACCANGG	aCgAAGaAAGTGAAGAA-aAAGG	8	34420419	+	4	1
RNA	GCAAAGCAAGTGAAGAACCANGG	aCgAAGaAAGTGAAGAAa-AAGG	8	34420419	+	4	1
RNA	GCAAAGCAAGTGAAGAACCANGG	GaAAAaCAAaTaAAGAA-CATGG	8	35273425	+	4	1
RNA	GCAAAGCAAGTGAAGAACCANGG	GaAAAaCAAaTaAAGAAC-ATGG	8	35273425	+	4	1
RNA	GCAAAGCAAGTGAAGAACCANGG	GCAAAGCAgGaGAAGgA-aAAGG	8	35126340	-	4	1
RNA	GCAAAGCAAGTGAAGAACCANGG	GCAAAGCAgGaGAAGgAa-AAGG	8	35126340	-	4	1
RNA	GCAAAGCAAGTGAAGAACCANGG	tCAAAaCAAGTGAtGAA-gACGG	8	37054047	+	4	1
RNA	GCAAAGCAAGTGAAGAACCANGG	tCAAAaCAAGTGAtGAAg-ACGG	8	37054047	+	4	1
RNA	GCAAAGCAAGTGAAGAACCANGG	GtgAAaCtAGTGAAGAA-CACGG	8	37643756	+	4	1
RNA	GCAAAGCAAGTGAAGAACCANGG	GtgAAaCtAGTGAAGAAC-ACGG	8	37643756	+	4	1
RNA	GCAAAGCAAGTGAAGAACCANGG	GaAAAaaAAGTGAAGcA-CATGG	8	42637647	+	4	1
RNA	GCAAAGCAAGTGAAGAACCANGG	GaAAAaaAAGTGAAGcAC-ATGG	8	42637647	+	4	1
RNA	GCAAAGCAAGTGAAGAACCANGG	cCAAAtgAAtTGAAGAA-CAGGG	8	42944223	+	4	1
RNA	GCAAAGCAAGTGAAGAACCANGG	cCAAAtgAAtTGAAGAAC-AGGG	8	42944223	+	4	1
RNA	GCAAAGCAAGTGAAGAACCANGG	GCAAgGCgAGcGAtGAA-CATGG	8	43112743	+	4	1
RNA	GCAAAGCAAGTGAAGAACCANGG	GCAAgGCgAGcGAtGAAC-ATGG	8	43112743	+	4	1
RNA	GCAAAGCAAGTGAAGAACCANGG	GCAAtcCAAGTGActAA-CAAGG	2	3893057	-	4	1
RNA	GCAAAGCAAGTGAAGAACCANGG	GCAAtcCAAGTGActAAC-AAGG	2	3893057	-	4	1
RNA	GCAAAGCAAGTGAAGAACCANGG	GaAAAGgAAGaGAAGAA-aAGGG	2	7002312	-	4	1
RNA	GCAAAGCAAGTGAAGAACCANGG	GaAAAGgAAGaGAAGAAa-AGGG	2	7002312	-	4	1
RNA	GCAAAGCAAGTGAAGAACCANGG	GCAAAtCAAcTtAAcAA-CAAGG	2	7374132	+	4	1
RNA	GCAAAGCAAGTGAAGAACCANGG	GCAAAtCAAcTtAAcAAC-AAGG	2	7374132	+	4	1
RNA	GCAAAGCAAGTGAAGAACCANGG	GCAAtGCAAGTctAtAA-CATGG	2	12290243	-	4	1
RNA	GCAAAGCAAGTGAAGAACCANGG	GCAAtGCAAGTctAtAAC-ATGG	2	12290243	-	4	1
RNA	GCAAAGCAAGTGAAGAACCANGG	cCAAAtCAAaTGAAGAA-tAAGG	2	19183577	+	4	1
RNA	GCAAAGCAAGTGAAGAACCANGG	cCAAAtCAAaTGAAGAAt-AAGG	2	19183577	+	4	1
RNA	GCAAAGCAAGTGAAGAACCANGG	GagAAaCAAGTGAAGAA-aATGG	2	22895944	-	4	1
RNA	GCAAAGCAAGTGAAGAACCANGG	GagAAaCAAGTGAAGAAa-ATGG	2	22895944	-	4	1
RNA	GCAAAGCAAGTGAAGAACCANGG	GCgAgGCAAGcGAtGAA-CATGG	2	23375633	+	4	1
RNA	GCAAAGCAAGTGAAGAACCANGG	GCgAgGCAAGcGAtGAAC-ATGG	2	23375633	+	4	1
RNA	GCAAAGCAAGTGAAGAACCANGG	aCAAAGaAAtTaAAGAA-CATGG	2	23768115	+	4	1
RNA	GCAAAGCAAGTGAAGAACCANGG	aCAAAGaAAtTaAAGAAC-ATGG	2	23768115	+	4	1
RNA	GCAAAGCAAGTGAAGAACCANGG	aCAAAGaAAtgGAAGAA-CACGG	2	30424814	+	4	1
RNA	GCAAAGCAAGTGAAGAACCANGG	aCAAAGaAAtgGAAGAAC-ACGG	2	30424814	+	4	1
RNA	GCAAAGCAAGTGAAGAACCANGG	aCAAAGaAAtgGAAGAA-CATGG	2	30468913	+	4	1
RNA	GCAAAGCAAGTGAAGAACCANGG	aCAAAGaAAtgGAAGAAC-ATGG	2	30468913	+	4	1
RNA	GCAAAGCAAGTGAAGAACCANGG	GCAAAGCAAGTaAAaAA-agTGG	2	31133658	-	4	1
RNA	GCAAAGCAAGTGAAGAACCANGG	GCAAAGCAAGTaAAaAAa-gTGG	2	31133658	-	4	1
RNA	GCAAAGCAAGTGAAGAACCANGG	GaAAAaaAAGTGAAaAA-CATGG	2	34500559	+	4	1
RNA	GCAAAGCAAGTGAAGAACCANGG	GaAAAaaAAGTGAAaAAC-ATGG	2	34500559	+	4	1
RNA	GCAAAGCAAGTGAAGAACCANGG	taAtAGgAAGTGAAGAA-CATGG	2	35505572	+	4	1
RNA	GCAAAGCAAGTGAAGAACCANGG	taAtAGgAAGTGAAGAAC-ATGG	2	35505572	+	4	1
RNA	GCAAAGCAAGTGAAGAACCANGG	GCAAAGgAAGaGAAGAA-ggTGG	2	36124610	-	4	1
RNA	GCAAAGCAAGTGAAGAACCANGG	GCAAAGgAAGaGAAGAAg-gTGG	2	36124610	-	4	1
RNA	GCAAAGCAAGTGAAGAACCANGG	GCAAtGgAAGTGAAaAg-CATGG	2	37340072	-	4	1
RNA	GCAAAGCAAGTGAAGAACCANGG	GCAAtGgAAGTGAAaAgC-ATGG	2	37340072	-	4	1
RNA	GCAAAGCAAGTGAAGAACCANGG	GaAAAGCAAtTaAAGAA-aAAGG	2	37405311	-	4	1
RNA	GCAAAGCAAGTGAAGAACCANGG	GaAAAGCAAtTaAAGAAa-AAGG	2	37405311	-	4	1
RNA	GCAAAGCAAGTGAAGAACCANGG	cCAAAGtgAGTGAAGAA-aATGG	2	43687628	+	4	1
RNA	GCAAAGCAAGTGAAGAACCANGG	cCAAAGtgAGTGAAGAAa-ATGG	2	43687628	+	4	1
RNA	GCAAAGCAAGTGAAGAACCANGG	GgAAttCAAGTGgAGAA-CAAGG	7	1596206	+	4	1
RNA	GCAAAGCAAGTGAAGAACCANGG	GgAAttCAAGTGgAGAAC-AAGG	7	1596206	+	4	1
RNA	GCAAAGCAAGTGAAGAACCANGG	GtAAAtCAAGTGAAGAA-agAGG	7	3577582	+	4	1
RNA	GCAAAGCAAGTGAAGAACCANGG	GtAAAtCAAGTGAAGAAa-gAGG	7	3577582	+	4	1
RNA	GCAAAGCAAGTGAAGAACCANGG	GgAAAGgAAGaGAAGAA-gAAGG	7	3734073	-	4	1
RNA	GCAAAGCAAGTGAAGAACCANGG	GgAAAGgAAGaGAAGAAg-AAGG	7	3734073	-	4	1
RNA	GCAAAGCAAGTGAAGAACCANGG	GCAcAGCAAtTGAtGAA-CtTGG	7	6412875	+	4	1
RNA	GCAAAGCAAGTGAAGAACCANGG	GCAcAGCAAtTGAtGAAC-tTGG	7	6412875	+	4	1
RNA	GCAAAGCAAGTGAAGAACCANGG	aCAAAGCAAtTGAAGAg-aAGGG	7	8241188	-	4	1
RNA	GCAAAGCAAGTGAAGAACCANGG	aCAAAGCAAtTGAAGAga-AGGG	7	8241188	-	4	1
RNA	GCAAAGCAAGTGAAGAACCANGG	GCAAAGaAAaTGAAaAt-CAGGG	7	12109596	+	4	1
RNA	GCAAAGCAAGTGAAGAACCANGG	GCAAAGaAAaTGAAaAtC-AGGG	7	12109596	+	4	1
RNA	GCAAAGCAAGTGAAGAACCANGG	cCAAAGgAAGTGAAGAg-aAAGG	7	14607700	-	4	1
RNA	GCAAAGCAAGTGAAGAACCANGG	cCAAAGgAAGTGAAGAga-AAGG	7	14607700	-	4	1
RNA	GCAAAGCAAGTGAAGAACCANGG	GCAtAGgAAtTGAAGAA-CtAGG	7	19335520	-	4	1
RNA	GCAAAGCAAGTGAAGAACCANGG	GCAtAGgAAtTGAAGAAC-tAGG	7	19335520	-	4	1
RNA	GCAAAGCAAGTGAAGAACCANGG	GgAAAGactGTGAAGAA-CATGG	7	22087962	-	4	1
RNA	GCAAAGCAAGTGAAGAACCANGG	GgAAAGactGTGAAGAAC-ATGG	7	22087962	-	4	1
RNA	GCAAAGCAAGTGAAGAACCANGG	GCAAgatgAGTGAAGAA-CATGG	7	25130551	-	4	1
RNA	GCAAAGCAAGTGAAGAACCANGG	GCAAgatgAGTGAAGAAC-ATGG	7	25130551	-	4	1
RNA	GCAAAGCAAGTGAAGAACCANGG	GCAAAGCcAtTGAAGgA-aAAGG	7	26862506	+	4	1
RNA	GCAAAGCAAGTGAAGAACCANGG	GCAAAGCcAtTGAAGgAa-AAGG	7	26862506	+	4	1
RNA	GCAAAGCAAGTGAAGAACCANGG	aCAAAGCgAGTtAgGAA-CAAGG	7	31384087	+	4	1
RNA	GCAAAGCAAGTGAAGAACCANGG	aCAAAGCgAGTtAgGAAC-AAGG	7	31384087	+	4	1
RNA	GCAAAGCAAGTGAAGAACCANGG	aaAAAGgAAGaGAAGAA-CAAGG	7	32988416	+	4	1
RNA	GCAAAGCAAGTGAAGAACCANGG	aaAAAGgAAGaGAAGAAC-AAGG	7	32988416	+	4	1
RNA	GCAAAGCAAGTGAAGAACCANGG	GaAAAGaAAaaGAAGAA-CATGG	7	33714973	-	4	1
RNA	GCAAAGCAAGTGAAGAACCANGG	GaAAAGaAAaaGAAGAAC-ATGG	7	33714973	-	4	1
RNA	GCAAAGCAAGTGAAGAACCANGG	GCAAAGatAGTGAAGAg-gAAGG	7	36371286	-	4	1
RNA	GCAAAGCAAGTGAAGAACCANGG	GCAAAGatAGTGAAGAgg-AAGG	7	36371286	-	4	1
RNA	GCAAAGCAAGTGAAGAACCANGG	ttAAAGCAAGTGAtGAA-CcAGG	7	36730501	-	4	1
RNA	GCAAAGCAAGTGAAGAACCANGG	ttAAAGCAAGTGAtGAAC-cAGG	7	36730501	-	4	1
RNA	GCAAAGCAAGTGAAGAACCANGG	GCAtAcCActTGAAGAA-CATGG	7	37139420	+	4	1
RNA	GCAAAGCAAGTGAAGAACCANGG	GCAtAcCActTGAAGAAC-ATGG	7	37139420	+	4	1
RNA	GCAAAGCAAGTGAAGAACCANGG	GCAAAGaAAagGAAtAA-CAAGG	7	38218180	+	4	1
RNA	GCAAAGCAAGTGAAGAACCANGG	GCAAAGaAAagGAAtAAC-AAGG	7	38218180	+	4	1
RNA	GCAAAGCAAGTGAAGAACCANGG	GCAAAcggAGTGAAGAA-aATGG	1	909833	+	4	1
RNA	GCAAAGCAAGTGAAGAACCANGG	GCAAAcggAGTGAAGAAa-ATGG	1	909833	+	4	1
RNA	GCAAAGCAAGTGAAGAACCANGG	GCAAAaCAttTGAAGtA-CAAGG	1	910501	-	4	1
RNA	GCAAAGCAAGTGAAGAACCANGG	GCAAAaCAttTGAAGtAC-AAGG	1	910501	-	4	1
RNA	GCAAAGCAAGTGAAGAACCANGG	GCAAAGaAAGTGAAtgA-aATGG	1	1758089	+	4	1
RNA	GCAAAGCAAGTGAAGAACCANGG	GCAAAGaAAGTGAAtgAa-ATGG	1	1758089	+	4	1
RNA	GCAAAGCAAGTGAAGAACCANGG	GCcAAGCAtGTGAgGAA-tATGG	1	9029193	+	4	1
RNA	GCAAAGCAAGTGAAGAACCANGG	GCcAAGCAtGTGAgGAAt-ATGG	1	9029193	+	4	1
RNA	GCAAAGCAAGTGAAGAACCANGG	GCcAAGCAtGTGAgGAA-tATGG	1	9037583	+	4	1
RNA	GCAAAGCAAGTGAAGAACCANGG	GCcAAGCAtGTGAgGAAt-ATGG	1	9037583	+	4	1
RNA	GCAAAGCAAGTGAAGAACCANGG	GCAAgGCAtGTGAAGAA-tgGGG	1	12388472	-	4	1
RNA	GCAAAGCAAGTGAAGAACCANGG	GCAAgGCAtGTGAAGAAt-gGGG	1	12388472	-	4	1
RNA	GCAAAGCAAGTGAAGAACCANGG	GCAAgGCAAGTGctGAA-tATGG	1	14875189	+	4	1
RNA	GCAAAGCAAGTGAAGAACCANGG	GCAAgGCAAGTGctGAAt-ATGG	1	14875189	+	4	1
RNA	GCAAAGCAAGTGAAGAACCANGG	GCAtAGgAAtTGAAGAA-CtAGG	1	17317386	-	4	1
RNA	GCAAAGCAAGTGAAGAACCANGG	GCAtAGgAAtTGAAGAAC-tAGG	1	17317386	-	4	1
RNA	GCAAAGCAAGTGAAGAACCANGG	GgAgAGCAgGTGAAaAA-CATGG	1	17319883	-	4	1
RNA	GCAAAGCAAGTGAAGAACCANGG	GgAgAGCAgGTGAAaAAC-ATGG	1	17319883	-	4	1
RNA	GCAAAGCAAGTGAAGAACCANGG	GCAgAGaAcGTGcAGAA-CATGG	1	18197929	+	4	1
RNA	GCAAAGCAAGTGAAGAACCANGG	GCAgAGaAcGTGcAGAAC-ATGG	1	18197929	+	4	1
RNA	GCAAAGCAAGTGAAGAACCANGG	agAAAGCAAtTcAAGAA-CAAGG	1	24714912	-	4	1
RNA	GCAAAGCAAGTGAAGAACCANGG	agAAAGCAAtTcAAGAAC-AAGG	1	24714912	-	4	1
RNA	GCAAAGCAAGTGAAGAACCANGG	GCAAAGCAAGTaAAaAA-agTGG	1	25817932	-	4	1
RNA	GCAAAGCAAGTGAAGAACCANGG	GCAAAGCAAGTaAAaAAa-gTGG	1	25817932	-	4	1
RNA	GCAAAGCAAGTGAAGAACCANGG	GCAAtcCAAGTGAAaAg-CATGG	1	30811504	-	4	1
RNA	GCAAAGCAAGTGAAGAACCANGG	GCAAtcCAAGTGAAaAgC-ATGG	1	30811504	-	4	1
RNA	GCAAAGCAAGTGAAGAACCANGG	tCcAAGCAAGTGAAGtc-CATGG	1	33115800	-	4	1
RNA	GCAAAGCAAGTGAAGAACCANGG	tCcAAGCAAGTGAAGtcC-ATGG	1	33115800	-	4	1
RNA	GCAAAGCAAGTGAAGAACCANGG	aCAAAaCAAGTGtAGAA-tATGG	1	37171892	-	4	1
RNA	GCAAAGCAAGTGAAGAACCANGG	aCAAAaCAAGTGtAGAAt-ATGG	1	37171892	-	4	1
RNA	GCAAAGCAAGTGAAGAACCANGG	GCAAAGCAAaTaAAaAA-aAAGG	1	37242555	-	4	1
RNA	GCAAAGCAAGTGAAGAACCANGG	GCAAAGCAAaTaAAaAAa-AAGG	1	37242555	-	4	1
RNA	GCAAAGCAAGTGAAGAACCANGG	GCAAAGCAAGaacAGAA-CtAGG	1	42320794	-	4	1
RNA	GCAAAGCAAGTGAAGAACCANGG	GCAAAGCAAGaacAGAAC-tAGG	1	42320794	-	4	1
RNA	GCAAAGCAAGTGAAGAACCANGG	GCgAAGagAGTGAAGAA-gAAGG	1	42499776	-	4	1
RNA	GCAAAGCAAGTGAAGAACCANGG	GCgAAGagAGTGAAGAAg-AAGG	1	42499776	-	4	1
RNA	GCAAAGCAAGTGAAGAACCANGG	GCAAAtCAAtTaAAGAA-aATGG	1	49887043	-	4	1
RNA	GCAAAGCAAGTGAAGAACCANGG	GCAAAtCAAtTaAAGAAa-ATGG	1	49887043	-	4	1
RNA	GCAAAGCAAGTGAAGAACCANGG	GCAAAaCAAaTGtAaAA-CATGG	1	52237373	-	4	1
RNA	GCAAAGCAAGTGAAGAACCANGG	GCAAAaCAAaTGtAaAAC-ATGG	1	52237373	-	4	1
RNA	GCAAAGCAAGTGAAGAACCANGG	cCAAAGCAAGTaAAGtt-CATGG	3	2196312	+	4	1
RNA	GCAAAGCAAGTGAAGAACCANGG	cCAAAGCAAGTaAAGttC-ATGG	3	2196312	+	4	1
RNA	GCAAAGCAAGTGAAGAACCANGG	tgAAAGCAAGTGAAGAg-tATGG	3	4321446	-	4	1
RNA	GCAAAGCAAGTGAAGAACCANGG	tgAAAGCAAGTGAAGAgt-ATGG	3	4321446	-	4	1
RNA	GCAAAGCAAGTGAAGAACCANGG	tCAAAaCAAGTGAtaAA-CAGGG	3	4649325	+	4	1
RNA	GCAAAGCAAGTGAAGAACCANGG	tCAAAaCAAGTGAtaAAC-AGGG	3	4649325	+	4	1
RNA	GCAAAGCAAGTGAAGAACCANGG	caAAAGaAAGTtAAGAA-CAAGG	3	7234483	-	4	1
RNA	GCAAAGCAAGTGAAGAACCANGG	caAAAGaAAGTtAAGAAC-AAGG	3	7234483	-	4	1
RNA	GCAAAGCAAGTGAAGAACCANGG	GttAAtCAAGTGAtGAA-CAAGG	3	9657065	-	4	1
RNA	GCAAAGCAAGTGAAGAACCANGG	GttAAtCAAGTGAtGAAC-AAGG	3	9657065	-	4	1
RNA	GCAAAGCAAGTGAAGAACCANGG	GCAAAcCAAGTGtAcAt-CAAGG	3	10443828	-	4	1
RNA	GCAAAGCAAGTGAAGAACCANGG	GCAAAcCAAGTGtAcAtC-AAGG	3	10443828	-	4	1
RNA	GCAAAGCAAGTGAAGAACCANGG	GCAAAGaAAGaaAAtAA-CATGG	3	19903953	-	4	1
RNA	GCAAAGCAAGTGAAGAACCANGG	GCAAAGaAAGaaAAtAAC-ATGG	3	19903953	-	4	1
RNA	GCAAAGCAAGTGAAGAACCANGG	GtAAAGaAAGaGAAGAA-aATGG	3	22190381	-	4	1
RNA	GCAAAGCAAGTGAAGAACCANGG	GtAAAGaAAGaGAAGAAa-ATGG	3	22190381	-	4	1
RNA	GCAAAGCAAGTGAAGAACCANGG	GacAAGaAAGTaAAGAA-CACGG	3	28051099	+	4	1
RNA	GCAAAGCAAGTGAAGAACCANGG	GacAAGaAAGTaAAGAAC-ACGG	3	28051099	+	4	1
RNA	GCAAAGCAAGTGAAGAACCANGG	tgAAAGaAAGTGAAGAA-gAAGG	3	33525766	+	4	1
RNA	GCAAAGCAAGTGAAGAACCANGG	tgAAAGaAAGTGAAGAAg-AAGG	3	33525766	+	4	1
RNA	GCAAAGCAAGTGAAGAACCANGG	tCAAcctAAGTGAAGAA-CACGG	3	43687255	+	4	1
RNA	GCAAAGCAAGTGAAGAACCANGG	tCAAcctAAGTGAAGAAC-ACGG	3	43687255	+	4	1
RNA	GCAAAGCAAGTGAAGAACCANGG	GCAAAtCAAGTtgAGAA-aAAGG	3	45116540	+	4	1
RNA	GCAAAGCAAGTGAAGAACCANGG	GCAAAtCAAGTtgAGAAa-AAGG	3	45116540	+	4	1
RNA	GCAAAGCAAGTGAAGAACCANGG	GaAAAGCAAGTGAAttt-CACGG	3	45305915	+	4	1
RNA	GCAAAGCAAGTGAAGAACCANGG	GaAAAGCAAGTGAAtttC-ACGG	3	45305915	+	4	1
RNA	GCAAAGCAAGTGAAGAACCANGG	cCAAAGCAtGTatAGAA-CAAGG	3	47240041	+	4	1
RNA	GCAAAGCAAGTGAAGAACCANGG	cCAAAGCAtGTatAGAAC-AAGG	3	47240041	+	4	1
RNA	GCAAAGCAAGTGAAGAACCANGG	GCAAtGCAAGTGtAGtA-tATGG	3	52591309	+	4	1
RNA	GCAAAGCAAGTGAAGAACCANGG	GCAAtGCAAGTGtAGtAt-ATGG	3	52591309	+	4	1
RNA	GCAAAGCAAGTGAAGAACCANGG	cCctAGCAA-TGAAGAAtCATGG	scaffold1281	497	-	4	1
RNA	GCAAAGCAAGTGAAGAACCANGG	cCctAGCAA-TGAAGAAtCATGG	scaffold0526	11812	+	4	1
RNA	GCAAAGCAAGTGAAGAACCANGG	GCAAAGgAA-gGAAtAAaCATGG	scaffold0466	9525	-	4	1
RNA	GCAAAGCAAGTGAAGAACCANGG	cCctAGCAA-TGAAGAAtCATGG	scaffold0144	27597	+	4	1
RNA	GCAAAGCAAGTGAAGAACCANGG	GgAAAGCAA-gagAGAACCAAGG	scaffold0118	8198	-	4	1
RNA	GCAAAGCAAGTGAAGAACCANGG	GgAgAGCcA-aGAAGAACCAAGG	scaffold0037	71287	+	4	1
RNA	GCAAAGCAAGTGAAGAACCANGG	cCctAGCAA-TGAAGAAtCATGG	scaffold0023	129663	-	4	1
RNA	GCAAAGCAAGTGAAGAACCANGG	GaAAAGCAA-gagAGAACCAAGG	scaffold0001	511687	+	4	1
RNA	GCAAAGCAAGTGAAGAACCANGG	GtAAAtCAA-TGgAGAAaCAAGG	6	3587828	+	4	1
RNA	GCAAAGCAAGTGAAGAACCANGG	GCAAtatAA-TGAAGAACaATGG	6	6761113	-	4	1
RNA	GCAAAGCAAGTGAAGAACCANGG	GCAAAaCAA-TGAtGAAaCgTGG	6	12057627	+	4	1
RNA	GCAAAGCAAGTGAAGAACCANGG	cCctAGCAA-TGAAGAAtCATGG	6	15008344	+	4	1
RNA	GCAAAGCAAGTGAAGAACCANGG	GaAgAaCAA-TGAAGAACaAAGG	6	17064690	-	4	1
RNA	GCAAAGCAAGTGAAGAACCANGG	aCAAAGaAA-TaAAGAACaATGG	6	17756526	-	4	1
RNA	GCAAAGCAAGTGAAGAACCANGG	cCctAGCAA-TGAAGAAtCATGG	6	22041532	-	4	1
RNA	GCAAAGCAAGTGAAGAACCANGG	GagAAcCAA-gGAAGAACCAAGG	6	25559026	+	4	1
RNA	GCAAAGCAAGTGAAGAACCANGG	aCAAAcCAA-TGAAGtACtATGG	5	5037954	+	4	1
RNA	GCAAAGCAAGTGAAGAACCANGG	cCAAAGtAA-TGAAGAAgCtCGG	5	11437474	+	4	1
RNA	GCAAAGCAAGTGAAGAACCANGG	GaAAAGCAA-gagAGAACCAAGG	5	18567573	-	4	1
RNA	GCAAAGCAAGTGAAGAACCANGG	aCAAAGCAt-TtAAGAACaAAGG	5	27309011	+	4	1
RNA	GCAAAGCAAGTGAAGAACCANGG	cCctAGCAA-TGAAGAAtCATGG	5	30409387	-	4	1
RNA	GCAAAGCAAGTGAAGAACCANGG	GCgAAaCtA-aGAAGAACCATGG	5	33092036	+	4	1
RNA	GCAAAGCAAGTGAAGAACCANGG	caAAAGCAA-TcAAtAACCATGG	5	33268300	+	4	1
RNA	GCAAAGCAAGTGAAGAACCANGG	aCAAAcaAA-TaAAGAACCAAGG	5	42355363	-	4	1
RNA	GCAAAGCAAGTGAAGAACCANGG	GCAAAaCAA-TcAAccACCAAGG	8	2005213	+	4	1
RNA	GCAAAGCAAGTGAAGAACCANGG	aaAAAGacA-TGAAGAACCAAGG	8	27824235	+	4	1
RNA	GCAAAGCAAGTGAAGAACCANGG	cCAtAaCAA-TGAAGAAaCATGG	8	35836061	+	4	1
RNA	GCAAAGCAAGTGAAGAACCANGG	GaAAAGCAA-gagAGAACCAAGG	8	40143413	+	4	1
RNA	GCAAAGCAAGTGAAGAACCANGG	GCAAAaCAA-aGggGAACCATGG	2	7981738	-	4	1
RNA	GCAAAGCAAGTGAAGAACCANGG	cCAAAGCAA-TaAAGAAaaAAGG	2	8293305	-	4	1
RNA	GCAAAGCAAGTGAAGAACCANGG	cCctAGCAA-TGAAGAAtCATGG	2	21176698	-	4	1
RNA	GCAAAGCAAGTGAAGAACCANGG	aCAAAagAA-TGAAGAACaATGG	2	23255572	-	4	1
RNA	GCAAAGCAAGTGAAGAACCANGG	tCAAAtCAA-TaAAGtACCATGG	2	41304309	-	4	1
RNA	GCAAAGCAAGTGAAGAACCANGG	GtAAAGaAA-TGAAGAAtCcGGG	2	41431882	-	4	1
RNA	GCAAAGCAAGTGAAGAACCANGG	GCAAAaCAA-aGggGAACCATGG	2	43237107	+	4	1
RNA	GCAAAGCAAGTGAAGAACCANGG	cCctAGCAA-TGAAGAAtCATGG	2	44351866	-	4	1
RNA	GCAAAGCAAGTGAAGAACCANGG	GaAAAGCAA-gagAGAACCAAGG	7	2387694	+	4	1
RNA	GCAAAGCAAGTGAAGAACCANGG	cCctAGCAA-TGAAGAAtCATGG	7	4722103	-	4	1
RNA	GCAAAGCAAGTGAAGAACCANGG	GaAAAGCAA-gagAGAACCAAGG	7	21758328	-	4	1
RNA	GCAAAGCAAGTGAAGAACCANGG	GCtAAGCAA-TcAAaAAaCAAGG	7	22596459	+	4	1
RNA	GCAAAGCAAGTGAAGAACCANGG	GCAAAGagA-TGAAGAAgtAAGG	7	24485962	-	4	1
RNA	GCAAAGCAAGTGAAGAACCANGG	tCAAAGCAt-atAAGAACCATGG	7	31236402	-	4	1
RNA	GCAAAGCAAGTGAAGAACCANGG	GgAAAGacA-TGAAGAACCtTGG	7	37713863	-	4	1
RNA	GCAAAGCAAGTGAAGAACCANGG	GCAAcGCgA-aGAAGAAgCAGGG	7	40519508	-	4	1
RNA	GCAAAGCAAGTGAAGAACCANGG	cCAAAGCAA-TaAAtAtCCAAGG	7	44058253	-	4	1
RNA	GCAAAGCAAGTGAAGAACCANGG	GCAAAGttA-TGgAGAACaAAGG	7	47410341	-	4	1
RNA	GCAAAGCAAGTGAAGAACCANGG	tCAAAGCAA-gcAtGAACCAGGG	1	12694916	-	4	1
RNA	GCAAAGCAAGTGAAGAACCANGG	GaAAAagAA-TGAAGAACaAAGG	1	16573272	-	4	1
RNA	GCAAAGCAAGTGAAGAACCANGG	aCAAgcCAA-TcAAGAACCAAGG	1	18894508	-	4	1
RNA	GCAAAGCAAGTGAAGAACCANGG	GCAAtGaAA-TGAAcAACCtTGG	1	20730534	+	4	1
RNA	GCAAAGCAAGTGAAGAACCANGG	GCAAgagAA-TGAAGAACaAAGG	1	26472725	-	4	1
RNA	GCAAAGCAAGTGAAGAACCANGG	cCctAGCAA-TGAAGAAtCATGG	1	37222286	+	4	1
RNA	GCAAAGCAAGTGAAGAACCANGG	GCAAtGCAA-TGAcGAAtgACGG	1	49505969	-	4	1
RNA	GCAAAGCAAGTGAAGAACCANGG	aCAAAGCAA-TGAgGcAtCATGG	1	49952505	+	4	1
RNA	GCAAAGCAAGTGAAGAACCANGG	cCtAAGCAA-TGAAGtACgACGG	3	7103293	+	4	1
RNA	GCAAAGCAAGTGAAGAACCANGG	cCctAGCAA-TGAAGAAtCATGG	3	11971900	+	4	1
RNA	GCAAAGCAAGTGAAGAACCANGG	tCAAtGCAA-TaAAGAACtAAGG	3	12004482	+	4	1
RNA	GCAAAGCAAGTGAAGAACCANGG	GCAAAatAA-gtAAGAACCATGG	3	20690660	+	4	1
RNA	GCAAAGCAAGTGAAGAACCANGG	GCActGCAA-TGtAGAACtACGG	3	20385965	-	4	1
RNA	GCAAAGCAAGTGAAGAACCANGG	GgAAAGaAc-TGAAGAAgCATGG	3	22158194	-	4	1
RNA	GCAAAGCAAGTGAAGAACCANGG	GCAAAGtAt-TGAAGAACagTGG	3	24113003	-	4	1
RNA	GCAAAGCAAGTGAAGAACCANGG	GaAAAGCAA-gagAGAACCAAGG	3	29494572	-	4	1
RNA	GCAAAGCAAGTGAAGAACCANGG	GCAAAGCAA-aGAAGgAaaATGG	3	30533786	+	4	1
RNA	GCAAAGCAAGTGAAGAACCANGG	GaAAAGCtA-TcAAaAACCAAGG	3	40748828	-	4	1
RNA	GCAAAGCAAGTGAAGAACCANGG	GCAtAaCAA-aGAAGAAaCAAGG	4	1565538	-	4	1
RNA	GCAAAGCAAGTGAAGAACCANGG	GCAgAGCAA-cttAGAACCAAGG	4	5939899	-	4	1
RNA	GCAAAGCAAGTGAAGAACCANGG	tCAAAGCAAGTG-AGcAgCtTGG	scaffold0660	7749	+	4	1
RNA	GCAAAGCAAGTGAAGAACCANGG	tCAAAGCAAGTGA-GcAgCtTGG	scaffold0660	7749	+	4	1
RNA	GCAAAGCAAGTGAAGAACCANGG	caAgAGCAAGaG-AGAACCAAGG	scaffold0276	21194	+	4	1
RNA	GCAAAGCAAGTGAAGAACCANGG	caAgAGCAAGaGA-GAACCAAGG	scaffold0276	21194	+	4	1
RNA	GCAAAGCAAGTGAAGAACCANGG	aCgAAGCAAGTG-tGAAaCAAGG	scaffold0160	31513	+	4	1
RNA	GCAAAGCAAGTGAAGAACCANGG	aCgAAGCAAGTGt-GAAaCAAGG	scaffold0160	31513	+	4	1
RNA	GCAAAGCAAGTGAAGAACCANGG	agAAAaCAAGaG-AGAACCAAGG	scaffold0137	25404	+	4	1
RNA	GCAAAGCAAGTGAAGAACCANGG	agAAAaCAAGaGA-GAACCAAGG	scaffold0137	25404	+	4	1
RNA	GCAAAGCAAGTGAAGAACCANGG	GaAgAGCAAGTt-AGAgCCAAGG	scaffold0093	36339	-	4	1
RNA	GCAAAGCAAGTGAAGAACCANGG	GaAgAGCAAGTtA-GAgCCAAGG	scaffold0093	36339	-	4	1
RNA	GCAAAGCAAGTGAAGAACCANGG	GaAgAGCAAGTt-AGAgCCAAGG	scaffold0093	25671	-	4	1
RNA	GCAAAGCAAGTGAAGAACCANGG	GaAgAGCAAGTtA-GAgCCAAGG	scaffold0093	25671	-	4	1
RNA	GCAAAGCAAGTGAAGAACCANGG	GaAgAGCAAGTt-AGAgCCAAGG	scaffold0093	42747	-	4	1
RNA	GCAAAGCAAGTGAAGAACCANGG	GaAgAGCAAGTtA-GAgCCAAGG	scaffold0093	42747	-	4	1
RNA	GCAAAGCAAGTGAAGAACCANGG	tCAAAGCAAGTG-AGcAgCtTGG	scaffold0082	38976	+	4	1
RNA	GCAAAGCAAGTGAAGAACCANGG	tCAAAGCAAGTGA-GcAgCtTGG	scaffold0082	38976	+	4	1
RNA	GCAAAGCAAGTGAAGAACCANGG	GCAAAGgAAGTc-gGAACtAAGG	scaffold0041	111971	+	4	1
RNA	GCAAAGCAAGTGAAGAACCANGG	GCAAAGgAAGTcg-GAACtAAGG	scaffold0041	111971	+	4	1
RNA	GCAAAGCAAGTGAAGAACCANGG	tCAAAGCAAGTG-AGcAgCtTGG	6	9146748	+	4	1
RNA	GCAAAGCAAGTGAAGAACCANGG	tCAAAGCAAGTGA-GcAgCtTGG	6	9146748	+	4	1
RNA	GCAAAGCAAGTGAAGAACCANGG	aCAAAGtgAGTG-AGAAaCATGG	5	654324	+	4	1
RNA	GCAAAGCAAGTGAAGAACCANGG	aCAAAGtgAGTGA-GAAaCATGG	5	654324	+	4	1
RNA	GCAAAGCAAGTGAAGAACCANGG	GaAgAGCAAcTt-AGAACCAAGG	5	598234	-	4	1
RNA	GCAAAGCAAGTGAAGAACCANGG	GaAgAGCAAcTtA-GAACCAAGG	5	598234	-	4	1
RNA	GCAAAGCAAGTGAAGAACCANGG	aggAAGCAAGaG-AGAACCAAGG	5	5581389	+	4	1
RNA	GCAAAGCAAGTGAAGAACCANGG	aggAAGCAAGaGA-GAACCAAGG	5	5581389	+	4	1
RNA	GCAAAGCAAGTGAAGAACCANGG	GaAAAGCAAaaG-AGAAaCATGG	5	8586855	+	4	1
RNA	GCAAAGCAAGTGAAGAACCANGG	GaAAAGCAAaaGA-GAAaCATGG	5	8586855	+	4	1
RNA	GCAAAGCAAGTGAAGAACCANGG	agAAAaCAAGaG-AGAACCAAGG	5	15462455	-	4	1
RNA	GCAAAGCAAGTGAAGAACCANGG	agAAAaCAAGaGA-GAACCAAGG	5	15462455	-	4	1
RNA	GCAAAGCAAGTGAAGAACCANGG	agAAAaCAAGaG-AGAACCAAGG	5	18894098	+	4	1
RNA	GCAAAGCAAGTGAAGAACCANGG	agAAAaCAAGaGA-GAACCAAGG	5	18894098	+	4	1
RNA	GCAAAGCAAGTGAAGAACCANGG	GgAgAtCAAGTG-AGAAaCACGG	5	18965227	-	4	1
RNA	GCAAAGCAAGTGAAGAACCANGG	GgAgAtCAAGTGA-GAAaCACGG	5	18965227	-	4	1
RNA	GCAAAGCAAGTGAAGAACCANGG	caAgAGCAAGaG-AGAACCAAGG	5	24799492	+	4	1
RNA	GCAAAGCAAGTGAAGAACCANGG	caAgAGCAAGaGA-GAACCAAGG	5	24799492	+	4	1
RNA	GCAAAGCAAGTGAAGAACCANGG	caAgAGCAAGaG-AGAACCAAGG	5	24794827	+	4	1
RNA	GCAAAGCAAGTGAAGAACCANGG	caAgAGCAAGaGA-GAACCAAGG	5	24794827	+	4	1
RNA	GCAAAGCAAGTGAAGAACCANGG	caAAAGCAAGTG-AGAAttATGG	5	32728372	-	4	1
RNA	GCAAAGCAAGTGAAGAACCANGG	caAAAGCAAGTGA-GAAttATGG	5	32728372	-	4	1
RNA	GCAAAGCAAGTGAAGAACCANGG	aggAAGCAAGaG-AGAACCAAGG	8	1051677	-	4	1
RNA	GCAAAGCAAGTGAAGAACCANGG	aggAAGCAAGaGA-GAACCAAGG	8	1051677	-	4	1
RNA	GCAAAGCAAGTGAAGAACCANGG	agcAAGCAAGaG-AGAACCAAGG	8	3698771	-	4	1
RNA	GCAAAGCAAGTGAAGAACCANGG	agcAAGCAAGaGA-GAACCAAGG	8	3698771	-	4	1
RNA	GCAAAGCAAGTGAAGAACCANGG	GaAAAGCAAtTG-AGAgaCAAGG	8	4576450	-	4	1
RNA	GCAAAGCAAGTGAAGAACCANGG	GaAAAGCAAtTGA-GAgaCAAGG	8	4576450	-	4	1
RNA	GCAAAGCAAGTGAAGAACCANGG	GCAAAaCAAaTG-AGAgCaATGG	8	7714680	-	4	1
RNA	GCAAAGCAAGTGAAGAACCANGG	GCAAAaCAAaTGA-GAgCaATGG	8	7714680	-	4	1
RNA	GCAAAGCAAGTGAAGAACCANGG	GtAAAGCAtGTG-AtAAaCACGG	8	9522593	-	4	1
RNA	GCAAAGCAAGTGAAGAACCANGG	GtAAAGCAtGTGA-tAAaCACGG	8	9522593	-	4	1
RNA	GCAAAGCAAGTGAAGAACCANGG	agAAAaCAAGaG-AGAACCAAGG	8	12913323	+	4	1
RNA	GCAAAGCAAGTGAAGAACCANGG	agAAAaCAAGaGA-GAACCAAGG	8	12913323	+	4	1
RNA	GCAAAGCAAGTGAAGAACCANGG	aggAAGCAAGaG-AGAACCAAGG	8	13361228	+	4	1
RNA	GCAAAGCAAGTGAAGAACCANGG	aggAAGCAAGaGA-GAACCAAGG	8	13361228	+	4	1
RNA	GCAAAGCAAGTGAAGAACCANGG	GaAgAGCAAcTt-AGAACCAAGG	8	16265951	+	4	1
RNA	GCAAAGCAAGTGAAGAACCANGG	GaAgAGCAAcTtA-GAACCAAGG	8	16265951	+	4	1
RNA	GCAAAGCAAGTGAAGAACCANGG	aggAAGCAAGaG-AGAACCAAGG	8	37240615	-	4	1
RNA	GCAAAGCAAGTGAAGAACCANGG	aggAAGCAAGaGA-GAACCAAGG	8	37240615	-	4	1
RNA	GCAAAGCAAGTGAAGAACCANGG	GCAAtGCAAaTG-AGAtgCATGG	2	1591256	-	4	1
RNA	GCAAAGCAAGTGAAGAACCANGG	GCAAtGCAAaTGA-GAtgCATGG	2	1591256	-	4	1
RNA	GCAAAGCAAGTGAAGAACCANGG	tCAAAGaAAGTG-AtAACaAGGG	2	3305381	-	4	1
RNA	GCAAAGCAAGTGAAGAACCANGG	tCAAAGaAAGTGA-tAACaAGGG	2	3305381	-	4	1
RNA	GCAAAGCAAGTGAAGAACCANGG	aggAAGCAAGaG-AGAACCAAGG	2	4078458	-	4	1
RNA	GCAAAGCAAGTGAAGAACCANGG	aggAAGCAAGaGA-GAACCAAGG	2	4078458	-	4	1
RNA	GCAAAGCAAGTGAAGAACCANGG	aCAAAatcAGTG-AGAACCATGG	2	5153411	+	4	1
RNA	GCAAAGCAAGTGAAGAACCANGG	aCAAAatcAGTGA-GAACCATGG	2	5153411	+	4	1
RNA	GCAAAGCAAGTGAAGAACCANGG	GCAAAaCAAagG-gGAACCATGG	2	7981738	-	4	1
RNA	GCAAAGCAAGTGAAGAACCANGG	GCAAAaCAAagGg-GAACCATGG	2	7981738	-	4	1
RNA	GCAAAGCAAGTGAAGAACCANGG	GCAAAGCAAGTc-ttcACCATGG	2	23242969	+	4	1
RNA	GCAAAGCAAGTGAAGAACCANGG	GCAAAGCAAGTct-tcACCATGG	2	23242969	+	4	1
RNA	GCAAAGCAAGTGAAGAACCANGG	GCAAAGCcAcTG-AtAACCgAGG	2	28801081	-	4	1
RNA	GCAAAGCAAGTGAAGAACCANGG	GCAAAGCcAcTGA-tAACCgAGG	2	28801081	-	4	1
RNA	GCAAAGCAAGTGAAGAACCANGG	aCAAAGttAtTG-AGAACCAAGG	2	33377795	+	4	1
RNA	GCAAAGCAAGTGAAGAACCANGG	aCAAAGttAtTGA-GAACCAAGG	2	33377795	+	4	1
RNA	GCAAAGCAAGTGAAGAACCANGG	caAgAGCAAGaG-AGAACCAAGG	2	36983647	+	4	1
RNA	GCAAAGCAAGTGAAGAACCANGG	caAgAGCAAGaGA-GAACCAAGG	2	36983647	+	4	1
RNA	GCAAAGCAAGTGAAGAACCANGG	GCAAtGgAAGTG-AaAAgCATGG	2	37340072	-	4	1
RNA	GCAAAGCAAGTGAAGAACCANGG	GCAAtGgAAGTGA-aAAgCATGG	2	37340072	-	4	1
RNA	GCAAAGCAAGTGAAGAACCANGG	GCAAAaCAAagG-gGAACCATGG	2	43237107	+	4	1
RNA	GCAAAGCAAGTGAAGAACCANGG	GCAAAaCAAagGg-GAACCATGG	2	43237107	+	4	1
RNA	GCAAAGCAAGTGAAGAACCANGG	caAgAGCAAGaG-AGAACCAAGG	7	2282114	-	4	1
RNA	GCAAAGCAAGTGAAGAACCANGG	caAgAGCAAGaGA-GAACCAAGG	7	2282114	-	4	1
RNA	GCAAAGCAAGTGAAGAACCANGG	GCAAAGaAAaTG-AaAAtCAGGG	7	12109596	+	4	1
RNA	GCAAAGCAAGTGAAGAACCANGG	GCAAAGaAAaTGA-aAAtCAGGG	7	12109596	+	4	1
RNA	GCAAAGCAAGTGAAGAACCANGG	aggAAGCAAGaG-AGAACCAAGG	7	11880103	-	4	1
RNA	GCAAAGCAAGTGAAGAACCANGG	aggAAGCAAGaGA-GAACCAAGG	7	11880103	-	4	1
RNA	GCAAAGCAAGTGAAGAACCANGG	GCAAAGCAAGTG-AagAaCcAGG	7	19506362	+	4	1
RNA	GCAAAGCAAGTGAAGAACCANGG	GCAAAGCAAGTGA-agAaCcAGG	7	19506362	+	4	1
RNA	GCAAAGCAAGTGAAGAACCANGG	aggAAGCAAGaG-AGAACCAAGG	7	20211213	+	4	1
RNA	GCAAAGCAAGTGAAGAACCANGG	aggAAGCAAGaGA-GAACCAAGG	7	20211213	+	4	1
RNA	GCAAAGCAAGTGAAGAACCANGG	agcAAGCAAGaG-AGAACCAAGG	7	27565996	-	4	1
RNA	GCAAAGCAAGTGAAGAACCANGG	agcAAGCAAGaGA-GAACCAAGG	7	27565996	-	4	1
RNA	GCAAAGCAAGTGAAGAACCANGG	GaAgAtaAAGTG-AGAACCACGG	7	30744348	+	4	1
RNA	GCAAAGCAAGTGAAGAACCANGG	GaAgAtaAAGTGA-GAACCACGG	7	30744348	+	4	1
RNA	GCAAAGCAAGTGAAGAACCANGG	tCAAAGCAtaTa-AGAACCATGG	7	31236402	-	4	1
RNA	GCAAAGCAAGTGAAGAACCANGG	tCAAAGCAtaTaA-GAACCATGG	7	31236402	-	4	1
RNA	GCAAAGCAAGTGAAGAACCANGG	GCAAAGgAAGTc-gGAACtAAGG	7	41143317	-	4	1
RNA	GCAAAGCAAGTGAAGAACCANGG	GCAAAGgAAGTcg-GAACtAAGG	7	41143317	-	4	1
RNA	GCAAAGCAAGTGAAGAACCANGG	caAAAGCAAGTG-AGAAttATGG	7	47235349	-	4	1
RNA	GCAAAGCAAGTGAAGAACCANGG	caAAAGCAAGTGA-GAAttATGG	7	47235349	-	4	1
RNA	GCAAAGCAAGTGAAGAACCANGG	GCAAAGaAAaTG-AGAAggAGGG	7	48139732	-	4	1
RNA	GCAAAGCAAGTGAAGAACCANGG	GCAAAGaAAaTGA-GAAggAGGG	7	48139732	-	4	1
RNA	GCAAAGCAAGTGAAGAACCANGG	GaAgAGCAAcTt-AGAACCAAGG	7	49159789	-	4	1
RNA	GCAAAGCAAGTGAAGAACCANGG	GaAgAGCAAcTtA-GAACCAAGG	7	49159789	-	4	1
RNA	GCAAAGCAAGTGAAGAACCANGG	GCAAAaCttGTG-tGAACCATGG	1	1388888	-	4	1
RNA	GCAAAGCAAGTGAAGAACCANGG	GCAAAaCttGTGt-GAACCATGG	1	1388888	-	4	1
RNA	GCAAAGCAAGTGAAGAACCANGG	aggAAGCAAGaG-AGAACCAAGG	1	3630051	+	4	1
RNA	GCAAAGCAAGTGAAGAACCANGG	aggAAGCAAGaGA-GAACCAAGG	1	3630051	+	4	1
RNA	GCAAAGCAAGTGAAGAACCANGG	tCAAAGCAAGca-tGAACCAGGG	1	12694916	-	4	1
RNA	GCAAAGCAAGTGAAGAACCANGG	tCAAAGCAAGcat-GAACCAGGG	1	12694916	-	4	1
RNA	GCAAAGCAAGTGAAGAACCANGG	agAAAGCAAGaG-AGAAtCAAGG	1	20571777	-	4	1
RNA	GCAAAGCAAGTGAAGAACCANGG	agAAAGCAAGaGA-GAAtCAAGG	1	20571777	-	4	1
RNA	GCAAAGCAAGTGAAGAACCANGG	agAAAaCAAGaG-AGAACCAAGG	1	21245297	-	4	1
RNA	GCAAAGCAAGTGAAGAACCANGG	agAAAaCAAGaGA-GAACCAAGG	1	21245297	-	4	1
RNA	GCAAAGCAAGTGAAGAACCANGG	agAAAaCAAGaG-AGAACCAAGG	1	29150295	+	4	1
RNA	GCAAAGCAAGTGAAGAACCANGG	agAAAaCAAGaGA-GAACCAAGG	1	29150295	+	4	1
RNA	GCAAAGCAAGTGAAGAACCANGG	GCAAcaCAAaTG-AGAAtCAAGG	1	28857219	-	4	1
RNA	GCAAAGCAAGTGAAGAACCANGG	GCAAcaCAAaTGA-GAAtCAAGG	1	28857219	-	4	1
RNA	GCAAAGCAAGTGAAGAACCANGG	aCAAgGCtAGTG-AGAcCCAAGG	1	30893667	+	4	1
RNA	GCAAAGCAAGTGAAGAACCANGG	aCAAgGCtAGTGA-GAcCCAAGG	1	30893667	+	4	1
RNA	GCAAAGCAAGTGAAGAACCANGG	GCAAtcCAAGTG-AaAAgCATGG	1	30811504	-	4	1
RNA	GCAAAGCAAGTGAAGAACCANGG	GCAAtcCAAGTGA-aAAgCATGG	1	30811504	-	4	1
RNA	GCAAAGCAAGTGAAGAACCANGG	GCAAAGacAGTG-AaAtCCAAGG	1	38284618	+	4	1
RNA	GCAAAGCAAGTGAAGAACCANGG	GCAAAGacAGTGA-aAtCCAAGG	1	38284618	+	4	1
RNA	GCAAAGCAAGTGAAGAACCANGG	caAgAGCAAGaG-AGAACCAAGG	1	39188745	+	4	1
RNA	GCAAAGCAAGTGAAGAACCANGG	caAgAGCAAGaGA-GAACCAAGG	1	39188745	+	4	1
RNA	GCAAAGCAAGTGAAGAACCANGG	GaAAAGCAAtTG-ttAACCATGG	1	48258657	+	4	1
RNA	GCAAAGCAAGTGAAGAACCANGG	GaAAAGCAAtTGt-tAACCATGG	1	48258657	+	4	1
RNA	GCAAAGCAAGTGAAGAACCANGG	GgAAAGgAgGTG-AGAACgAGGG	1	51392503	+	4	1
RNA	GCAAAGCAAGTGAAGAACCANGG	GgAAAGgAgGTGA-GAACgAGGG	1	51392503	+	4	1
RNA	GCAAAGCAAGTGAAGAACCANGG	agAAAaCAAGaG-AGAACCAAGG	3	3552764	+	4	1
RNA	GCAAAGCAAGTGAAGAACCANGG	agAAAaCAAGaGA-GAACCAAGG	3	3552764	+	4	1
RNA	GCAAAGCAAGTGAAGAACCANGG	caAgAGCAAGaG-AGAACCAAGG	3	3781867	+	4	1
RNA	GCAAAGCAAGTGAAGAACCANGG	caAgAGCAAGaGA-GAACCAAGG	3	3781867	+	4	1
RNA	GCAAAGCAAGTGAAGAACCANGG	GagAAcCAAGgG-AGAACCAAGG	3	4087005	-	4	1
RNA	GCAAAGCAAGTGAAGAACCANGG	GagAAcCAAGgGA-GAACCAAGG	3	4087005	-	4	1
RNA	GCAAAGCAAGTGAAGAACCANGG	tCAAAaCAAGTG-AtAAaCAGGG	3	4649325	+	4	1
RNA	GCAAAGCAAGTGAAGAACCANGG	tCAAAaCAAGTGA-tAAaCAGGG	3	4649325	+	4	1
RNA	GCAAAGCAAGTGAAGAACCANGG	aCtAAaCAAGgG-AGAACCAAGG	3	8802224	-	4	1
RNA	GCAAAGCAAGTGAAGAACCANGG	aCtAAaCAAGgGA-GAACCAAGG	3	8802224	-	4	1
RNA	GCAAAGCAAGTGAAGAACCANGG	aggAAGCAAGaG-AGAACCAAGG	3	10768776	-	4	1
RNA	GCAAAGCAAGTGAAGAACCANGG	aggAAGCAAGaGA-GAACCAAGG	3	10768776	-	4	1
RNA	GCAAAGCAAGTGAAGAACCANGG	agcAAGCAAGaG-AGAACCAAGG	3	12270415	+	4	1
RNA	GCAAAGCAAGTGAAGAACCANGG	agcAAGCAAGaGA-GAACCAAGG	3	12270415	+	4	1
RNA	GCAAAGCAAGTGAAGAACCANGG	GaAAAaCAAGaG-AGAACaATGG	3	12569801	-	4	1
RNA	GCAAAGCAAGTGAAGAACCANGG	GaAAAaCAAGaGA-GAACaATGG	3	12569801	-	4	1
RNA	GCAAAGCAAGTGAAGAACCANGG	GaAAAaCAAGaG-AGAACaATGG	3	13546265	-	4	1
RNA	GCAAAGCAAGTGAAGAACCANGG	GaAAAaCAAGaGA-GAACaATGG	3	13546265	-	4	1
RNA	GCAAAGCAAGTGAAGAACCANGG	aggAAGCAAGaG-AGAACCAAGG	3	21150595	+	4	1
RNA	GCAAAGCAAGTGAAGAACCANGG	aggAAGCAAGaGA-GAACCAAGG	3	21150595	+	4	1
RNA	GCAAAGCAAGTGAAGAACCANGG	GtAAAGCAtGTG-AGAtaCATGG	3	23017226	-	4	1
RNA	GCAAAGCAAGTGAAGAACCANGG	GtAAAGCAtGTGA-GAtaCATGG	3	23017226	-	4	1
RNA	GCAAAGCAAGTGAAGAACCANGG	GaAAAGCAAGTt-AGAAgaAGGG	3	29402179	-	4	1
RNA	GCAAAGCAAGTGAAGAACCANGG	GaAAAGCAAGTtA-GAAgaAGGG	3	29402179	-	4	1
RNA	GCAAAGCAAGTGAAGAACCANGG	aggAAGCAAGaG-AGAACCAAGG	3	30099460	+	4	1
RNA	GCAAAGCAAGTGAAGAACCANGG	aggAAGCAAGaGA-GAACCAAGG	3	30099460	+	4	1
RNA	GCAAAGCAAGTGAAGAACCANGG	aggAAGCAAGaG-AGAACCAAGG	3	45612674	-	4	1
RNA	GCAAAGCAAGTGAAGAACCANGG	aggAAGCAAGaGA-GAACCAAGG	3	45612674	-	4	1
RNA	GCAAAGCAAGTGAAGAACCANGG	agAAAaCAAGaG-AGAACCAAGG	3	51854212	+	4	1
RNA	GCAAAGCAAGTGAAGAACCANGG	agAAAaCAAGaGA-GAACCAAGG	3	51854212	+	4	1
RNA	GCAAAGCAAGTGAAGAACCANGG	aggAAGCAAGaG-AGAACCAAGG	4	392151	-	4	1
RNA	GCAAAGCAAGTGAAGAACCANGG	aggAAGCAAGaGA-GAACCAAGG	4	392151	-	4	1
RNA	GCAAAGCAAGTGAAGAACCANGG	GgAAAcaAAGTG-AGAACaAAGG	4	8704527	+	4	1
RNA	GCAAAGCAAGTGAAGAACCANGG	GgAAAcaAAGTGA-GAACaAAGG	4	8704527	+	4	1
RNA	GCAAAGCAAGTGAAGAACCANGG	GC-AAaaAAGTGtAaAACCACGG	6	3209980	-	4	1
RNA	GCAAAGCAAGTGAAGAACCANGG	GCA-AaaAAGTGtAaAACCACGG	6	3209980	-	4	1
RNA	GCAAAGCAAGTGAAGAACCANGG	GCAA-aaAAGTGtAaAACCACGG	6	3209980	-	4	1
RNA	GCAAAGCAAGTGAAGAACCANGG	GC-AAGggAGaGAAtAACCAAGG	6	16497975	+	4	1
RNA	GCAAAGCAAGTGAAGAACCANGG	GCA-AGggAGaGAAtAACCAAGG	6	16497975	+	4	1
RNA	GCAAAGCAAGTGAAGAACCANGG	GCAA-GggAGaGAAtAACCAAGG	6	16497975	+	4	1
RNA	GCAAAGCAAGTGAAGAACCANGG	Ga-AAaCAtGTGAAGAAtCAAGG	6	26512719	-	4	1
RNA	GCAAAGCAAGTGAAGAACCANGG	GaA-AaCAtGTGAAGAAtCAAGG	6	26512719	-	4	1
RNA	GCAAAGCAAGTGAAGAACCANGG	GaAA-aCAtGTGAAGAAtCAAGG	6	26512719	-	4	1
RNA	GCAAAGCAAGTGAAGAACCANGG	Ga-AAaCAtGTGAAGAAtCAAGG	6	26517835	-	4	1
RNA	GCAAAGCAAGTGAAGAACCANGG	GaA-AaCAtGTGAAGAAtCAAGG	6	26517835	-	4	1
RNA	GCAAAGCAAGTGAAGAACCANGG	GaAA-aCAtGTGAAGAAtCAAGG	6	26517835	-	4	1
RNA	GCAAAGCAAGTGAAGAACCANGG	GC-tAGCAtGaGAAGAACtATGG	6	28520038	+	4	1
RNA	GCAAAGCAAGTGAAGAACCANGG	GCt-AGCAtGaGAAGAACtATGG	6	28520038	+	4	1
RNA	GCAAAGCAAGTGAAGAACCANGG	GCtA-GCAtGaGAAGAACtATGG	6	28520038	+	4	1
RNA	GCAAAGCAAGTGAAGAACCANGG	aa-AAaCAAGTGAAaAACCAGGG	5	8376214	-	4	1
RNA	GCAAAGCAAGTGAAGAACCANGG	aaA-AaCAAGTGAAaAACCAGGG	5	8376214	-	4	1
RNA	GCAAAGCAAGTGAAGAACCANGG	aaAA-aCAAGTGAAaAACCAGGG	5	8376214	-	4	1
RNA	GCAAAGCAAGTGAAGAACCANGG	GC-AAaCActTGAAGcACCAAGG	5	17033763	-	4	1
RNA	GCAAAGCAAGTGAAGAACCANGG	GCA-AaCActTGAAGcACCAAGG	5	17033763	-	4	1
RNA	GCAAAGCAAGTGAAGAACCANGG	GCAA-aCActTGAAGcACCAAGG	5	17033763	-	4	1
RNA	GCAAAGCAAGTGAAGAACCANGG	Ga-cAtCAAGTGAAGAAtCAAGG	5	19763833	-	4	1
RNA	GCAAAGCAAGTGAAGAACCANGG	Gac-AtCAAGTGAAGAAtCAAGG	5	19763833	-	4	1
RNA	GCAAAGCAAGTGAAGAACCANGG	GacA-tCAAGTGAAGAAtCAAGG	5	19763833	-	4	1
RNA	GCAAAGCAAGTGAAGAACCANGG	GC-AAtCAgGTGAAaAAtCACGG	5	40238955	+	4	1
RNA	GCAAAGCAAGTGAAGAACCANGG	GCA-AtCAgGTGAAaAAtCACGG	5	40238955	+	4	1
RNA	GCAAAGCAAGTGAAGAACCANGG	GCAA-tCAgGTGAAaAAtCACGG	5	40238955	+	4	1
RNA	GCAAAGCAAGTGAAGAACCANGG	Gg-AAGCAAtTtAAGAACCtAGG	5	40780089	+	4	1
RNA	GCAAAGCAAGTGAAGAACCANGG	GgA-AGCAAtTtAAGAACCtAGG	5	40780089	+	4	1
RNA	GCAAAGCAAGTGAAGAACCANGG	GgAA-GCAAtTtAAGAACCtAGG	5	40780089	+	4	1
RNA	GCAAAGCAAGTGAAGAACCANGG	GC-tAGCAtGaGAAGAACtATGG	5	42139395	-	4	1
RNA	GCAAAGCAAGTGAAGAACCANGG	GCt-AGCAtGaGAAGAACtATGG	5	42139395	-	4	1
RNA	GCAAAGCAAGTGAAGAACCANGG	GCtA-GCAtGaGAAGAACtATGG	5	42139395	-	4	1
RNA	GCAAAGCAAGTGAAGAACCANGG	aC-AAaCAAaTaAAGAACCAAGG	5	42355363	-	4	1
RNA	GCAAAGCAAGTGAAGAACCANGG	aCA-AaCAAaTaAAGAACCAAGG	5	42355363	-	4	1
RNA	GCAAAGCAAGTGAAGAACCANGG	aCAA-aCAAaTaAAGAACCAAGG	5	42355363	-	4	1
RNA	GCAAAGCAAGTGAAGAACCANGG	Ga-AAGtAAGaGAAGAACaAAGG	8	12849893	-	4	1
RNA	GCAAAGCAAGTGAAGAACCANGG	GaA-AGtAAGaGAAGAACaAAGG	8	12849893	-	4	1
RNA	GCAAAGCAAGTGAAGAACCANGG	GaAA-GtAAGaGAAGAACaAAGG	8	12849893	-	4	1
RNA	GCAAAGCAAGTGAAGAACCANGG	GC-tAGCAtGaGAAGAACtATGG	8	21029957	+	4	1
RNA	GCAAAGCAAGTGAAGAACCANGG	GCt-AGCAtGaGAAGAACtATGG	8	21029957	+	4	1
RNA	GCAAAGCAAGTGAAGAACCANGG	GCtA-GCAtGaGAAGAACtATGG	8	21029957	+	4	1
RNA	GCAAAGCAAGTGAAGAACCANGG	GC-AAGaAAaTaAAaAACCAGGG	8	23159223	-	4	1
RNA	GCAAAGCAAGTGAAGAACCANGG	GCA-AGaAAaTaAAaAACCAGGG	8	23159223	-	4	1
RNA	GCAAAGCAAGTGAAGAACCANGG	GCAA-GaAAaTaAAaAACCAGGG	8	23159223	-	4	1
RNA	GCAAAGCAAGTGAAGAACCANGG	GC-AAtCAtGTGtAGAACCtAGG	8	23958234	+	4	1
RNA	GCAAAGCAAGTGAAGAACCANGG	GCA-AtCAtGTGtAGAACCtAGG	8	23958234	+	4	1
RNA	GCAAAGCAAGTGAAGAACCANGG	GCAA-tCAtGTGtAGAACCtAGG	8	23958234	+	4	1
RNA	GCAAAGCAAGTGAAGAACCANGG	GC-AAaCAAGTGAtGAAttAGGG	8	28068576	-	4	1
RNA	GCAAAGCAAGTGAAGAACCANGG	GCA-AaCAAGTGAtGAAttAGGG	8	28068576	-	4	1
RNA	GCAAAGCAAGTGAAGAACCANGG	GCAA-aCAAGTGAtGAAttAGGG	8	28068576	-	4	1
RNA	GCAAAGCAAGTGAAGAACCANGG	GC-AAcCAAGTtcAGAAaCAAGG	2	18660986	+	4	1
RNA	GCAAAGCAAGTGAAGAACCANGG	GCA-AcCAAGTtcAGAAaCAAGG	2	18660986	+	4	1
RNA	GCAAAGCAAGTGAAGAACCANGG	GCAA-cCAAGTtcAGAAaCAAGG	2	18660986	+	4	1
RNA	GCAAAGCAAGTGAAGAACCANGG	GC-AAGCAAGaGtAGAAtgAAGG	2	22854676	+	4	1
RNA	GCAAAGCAAGTGAAGAACCANGG	GCA-AGCAAGaGtAGAAtgAAGG	2	22854676	+	4	1
RNA	GCAAAGCAAGTGAAGAACCANGG	GCAA-GCAAGaGtAGAAtgAAGG	2	22854676	+	4	1
RNA	GCAAAGCAAGTGAAGAACCANGG	GC-AAtCAAtTGAAGctCCAAGG	2	41267659	-	4	1
RNA	GCAAAGCAAGTGAAGAACCANGG	GCA-AtCAAtTGAAGctCCAAGG	2	41267659	-	4	1
RNA	GCAAAGCAAGTGAAGAACCANGG	GCAA-tCAAtTGAAGctCCAAGG	2	41267659	-	4	1
RNA	GCAAAGCAAGTGAAGAACCANGG	GC-AAGaAAGaGAAGAgtCAAGG	2	42879652	-	4	1
RNA	GCAAAGCAAGTGAAGAACCANGG	GCA-AGaAAGaGAAGAgtCAAGG	2	42879652	-	4	1
RNA	GCAAAGCAAGTGAAGAACCANGG	GCAA-GaAAGaGAAGAgtCAAGG	2	42879652	-	4	1
RNA	GCAAAGCAAGTGAAGAACCANGG	tC-AAGCAAaTGAAaAAaCAAGG	7	219254	+	4	1
RNA	GCAAAGCAAGTGAAGAACCANGG	tCA-AGCAAaTGAAaAAaCAAGG	7	219254	+	4	1
RNA	GCAAAGCAAGTGAAGAACCANGG	tCAA-GCAAaTGAAaAAaCAAGG	7	219254	+	4	1
RNA	GCAAAGCAAGTGAAGAACCANGG	GC-AAaaAAGTGAAGAAaaATGG	7	1970193	-	4	1
RNA	GCAAAGCAAGTGAAGAACCANGG	GCA-AaaAAGTGAAGAAaaATGG	7	1970193	-	4	1
RNA	GCAAAGCAAGTGAAGAACCANGG	GCAA-aaAAGTGAAGAAaaATGG	7	1970193	-	4	1
RNA	GCAAAGCAAGTGAAGAACCANGG	GC-AAGCcAGTtgAaAACCAGGG	7	15444060	-	4	1
RNA	GCAAAGCAAGTGAAGAACCANGG	GCA-AGCcAGTtgAaAACCAGGG	7	15444060	-	4	1
RNA	GCAAAGCAAGTGAAGAACCANGG	GCAA-GCcAGTtgAaAACCAGGG	7	15444060	-	4	1
RNA	GCAAAGCAAGTGAAGAACCANGG	GC-AAGCcAGTtgAaAACCAGGG	7	15508842	-	4	1
RNA	GCAAAGCAAGTGAAGAACCANGG	GCA-AGCcAGTtgAaAACCAGGG	7	15508842	-	4	1
RNA	GCAAAGCAAGTGAAGAACCANGG	GCAA-GCcAGTtgAaAACCAGGG	7	15508842	-	4	1
RNA	GCAAAGCAAGTGAAGAACCANGG	GC-tAGCAtGaGAAGAACtATGG	7	18481984	+	4	1
RNA	GCAAAGCAAGTGAAGAACCANGG	GCt-AGCAtGaGAAGAACtATGG	7	18481984	+	4	1
RNA	GCAAAGCAAGTGAAGAACCANGG	GCtA-GCAtGaGAAGAACtATGG	7	18481984	+	4	1
RNA	GCAAAGCAAGTGAAGAACCANGG	aC-AAGaAAGTcAAGAtCCAAGG	7	20050853	-	4	1
RNA	GCAAAGCAAGTGAAGAACCANGG	aCA-AGaAAGTcAAGAtCCAAGG	7	20050853	-	4	1
RNA	GCAAAGCAAGTGAAGAACCANGG	aCAA-GaAAGTcAAGAtCCAAGG	7	20050853	-	4	1
RNA	GCAAAGCAAGTGAAGAACCANGG	GC-tAGtAAGTGAAGAAtCcTGG	7	22322306	+	4	1
RNA	GCAAAGCAAGTGAAGAACCANGG	GCt-AGtAAGTGAAGAAtCcTGG	7	22322306	+	4	1
RNA	GCAAAGCAAGTGAAGAACCANGG	GCtA-GtAAGTGAAGAAtCcTGG	7	22322306	+	4	1
RNA	GCAAAGCAAGTGAAGAACCANGG	tC-AAGaAAGTGAAGAgCCtCGG	7	23843799	+	4	1
RNA	GCAAAGCAAGTGAAGAACCANGG	tCA-AGaAAGTGAAGAgCCtCGG	7	23843799	+	4	1
RNA	GCAAAGCAAGTGAAGAACCANGG	tCAA-GaAAGTGAAGAgCCtCGG	7	23843799	+	4	1
RNA	GCAAAGCAAGTGAAGAACCANGG	aC-AAGgtAGTGAAGAcCCAAGG	7	23706373	-	4	1
RNA	GCAAAGCAAGTGAAGAACCANGG	aCA-AGgtAGTGAAGAcCCAAGG	7	23706373	-	4	1
RNA	GCAAAGCAAGTGAAGAACCANGG	aCAA-GgtAGTGAAGAcCCAAGG	7	23706373	-	4	1
RNA	GCAAAGCAAGTGAAGAACCANGG	GC-AAcCAAGTtcAGAAgCAAGG	7	26348770	-	4	1
RNA	GCAAAGCAAGTGAAGAACCANGG	GCA-AcCAAGTtcAGAAgCAAGG	7	26348770	-	4	1
RNA	GCAAAGCAAGTGAAGAACCANGG	GCAA-cCAAGTtcAGAAgCAAGG	7	26348770	-	4	1
RNA	GCAAAGCAAGTGAAGAACCANGG	GC-AAcCAAGTtcAGAAgCAAGG	7	26363790	-	4	1
RNA	GCAAAGCAAGTGAAGAACCANGG	GCA-AcCAAGTtcAGAAgCAAGG	7	26363790	-	4	1
RNA	GCAAAGCAAGTGAAGAACCANGG	GCAA-cCAAGTtcAGAAgCAAGG	7	26363790	-	4	1
RNA	GCAAAGCAAGTGAAGAACCANGG	Gt-tAGacAGTGAAGAACCAGGG	7	34372131	+	4	1
RNA	GCAAAGCAAGTGAAGAACCANGG	Gtt-AGacAGTGAAGAACCAGGG	7	34372131	+	4	1
RNA	GCAAAGCAAGTGAAGAACCANGG	GttA-GacAGTGAAGAACCAGGG	7	34372131	+	4	1
RNA	GCAAAGCAAGTGAAGAACCANGG	GC-tAGCAtGTGAAGAAagAAGG	7	38479305	-	4	1
RNA	GCAAAGCAAGTGAAGAACCANGG	GCt-AGCAtGTGAAGAAagAAGG	7	38479305	-	4	1
RNA	GCAAAGCAAGTGAAGAACCANGG	GCtA-GCAtGTGAAGAAagAAGG	7	38479305	-	4	1
RNA	GCAAAGCAAGTGAAGAACCANGG	GC-gAGaAAGgGAAaAACCACGG	7	38994177	+	4	1
RNA	GCAAAGCAAGTGAAGAACCANGG	GCg-AGaAAGgGAAaAACCACGG	7	38994177	+	4	1
RNA	GCAAAGCAAGTGAAGAACCANGG	GCgA-GaAAGgGAAaAACCACGG	7	38994177	+	4	1
RNA	GCAAAGCAAGTGAAGAACCANGG	Ga-tAGCAAGaGAtGAACCACGG	7	39222544	+	4	1
RNA	GCAAAGCAAGTGAAGAACCANGG	Gat-AGCAAGaGAtGAACCACGG	7	39222544	+	4	1
RNA	GCAAAGCAAGTGAAGAACCANGG	GatA-GCAAGaGAtGAACCACGG	7	39222544	+	4	1
RNA	GCAAAGCAAGTGAAGAACCANGG	GC-AAagAAaTGAAGAACaATGG	1	825284	-	4	1
RNA	GCAAAGCAAGTGAAGAACCANGG	GCA-AagAAaTGAAGAACaATGG	1	825284	-	4	1
RNA	GCAAAGCAAGTGAAGAACCANGG	GCAA-agAAaTGAAGAACaATGG	1	825284	-	4	1
RNA	GCAAAGCAAGTGAAGAACCANGG	GC-tAGCAAGaGAAatACCATGG	1	2799745	-	4	1
RNA	GCAAAGCAAGTGAAGAACCANGG	GCt-AGCAAGaGAAatACCATGG	1	2799745	-	4	1
RNA	GCAAAGCAAGTGAAGAACCANGG	GCtA-GCAAGaGAAatACCATGG	1	2799745	-	4	1
RNA	GCAAAGCAAGTGAAGAACCANGG	Gt-AgGCAAGgGAAGAACaAAGG	1	6542667	-	4	1
RNA	GCAAAGCAAGTGAAGAACCANGG	GtA-gGCAAGgGAAGAACaAAGG	1	6542667	-	4	1
RNA	GCAAAGCAAGTGAAGAACCANGG	GtAg-GCAAGgGAAGAACaAAGG	1	6542667	-	4	1
RNA	GCAAAGCAAGTGAAGAACCANGG	Gg-AAGgAAGgaAAGAACCAAGG	1	7281604	+	4	1
RNA	GCAAAGCAAGTGAAGAACCANGG	GgA-AGgAAGgaAAGAACCAAGG	1	7281604	+	4	1
RNA	GCAAAGCAAGTGAAGAACCANGG	GgAA-GgAAGgaAAGAACCAAGG	1	7281604	+	4	1
RNA	GCAAAGCAAGTGAAGAACCANGG	GC-tAaCAtGTGAAGAAtCATGG	1	10932011	+	4	1
RNA	GCAAAGCAAGTGAAGAACCANGG	GCt-AaCAtGTGAAGAAtCATGG	1	10932011	+	4	1
RNA	GCAAAGCAAGTGAAGAACCANGG	GCtA-aCAtGTGAAGAAtCATGG	1	10932011	+	4	1
RNA	GCAAAGCAAGTGAAGAACCANGG	tC-gAGaAAGTaAAGAACCAAGG	1	15422278	+	4	1
RNA	GCAAAGCAAGTGAAGAACCANGG	tCg-AGaAAGTaAAGAACCAAGG	1	15422278	+	4	1
RNA	GCAAAGCAAGTGAAGAACCANGG	tCgA-GaAAGTaAAGAACCAAGG	1	15422278	+	4	1
RNA	GCAAAGCAAGTGAAGAACCANGG	GC-AAGCAtGcaAgGAACCAAGG	1	16396995	-	4	1
RNA	GCAAAGCAAGTGAAGAACCANGG	GCA-AGCAtGcaAgGAACCAAGG	1	16396995	-	4	1
RNA	GCAAAGCAAGTGAAGAACCANGG	GCAA-GCAtGcaAgGAACCAAGG	1	16396995	-	4	1
RNA	GCAAAGCAAGTGAAGAACCANGG	aC-AAGCcAaTcAAGAACCAAGG	1	18894508	-	4	1
RNA	GCAAAGCAAGTGAAGAACCANGG	aCA-AGCcAaTcAAGAACCAAGG	1	18894508	-	4	1
RNA	GCAAAGCAAGTGAAGAACCANGG	aCAA-GCcAaTcAAGAACCAAGG	1	18894508	-	4	1
RNA	GCAAAGCAAGTGAAGAACCANGG	ag-AAGaAAGaGAAGAACCAGGG	1	21080009	+	4	1
RNA	GCAAAGCAAGTGAAGAACCANGG	agA-AGaAAGaGAAGAACCAGGG	1	21080009	+	4	1
RNA	GCAAAGCAAGTGAAGAACCANGG	agAA-GaAAGaGAAGAACCAGGG	1	21080009	+	4	1
RNA	GCAAAGCAAGTGAAGAACCANGG	GC-AAGagAaTGAAGAACaAAGG	1	26472725	-	4	1
RNA	GCAAAGCAAGTGAAGAACCANGG	GCA-AGagAaTGAAGAACaAAGG	1	26472725	-	4	1
RNA	GCAAAGCAAGTGAAGAACCANGG	GCAA-GagAaTGAAGAACaAAGG	1	26472725	-	4	1
RNA	GCAAAGCAAGTGAAGAACCANGG	Gt-AAcCAAGTGAAGgAtCAGGG	1	32793802	-	4	1
RNA	GCAAAGCAAGTGAAGAACCANGG	GtA-AcCAAGTGAAGgAtCAGGG	1	32793802	-	4	1
RNA	GCAAAGCAAGTGAAGAACCANGG	GtAA-cCAAGTGAAGgAtCAGGG	1	32793802	-	4	1
RNA	GCAAAGCAAGTGAAGAACCANGG	GC-AAGCActTcAAGAACCtTGG	1	36634149	-	4	1
RNA	GCAAAGCAAGTGAAGAACCANGG	GCA-AGCActTcAAGAACCtTGG	1	36634149	-	4	1
RNA	GCAAAGCAAGTGAAGAACCANGG	GCAA-GCActTcAAGAACCtTGG	1	36634149	-	4	1
RNA	GCAAAGCAAGTGAAGAACCANGG	GC-AAGtAcGTGAAGAAatAAGG	1	42260867	-	4	1
RNA	GCAAAGCAAGTGAAGAACCANGG	GCA-AGtAcGTGAAGAAatAAGG	1	42260867	-	4	1
RNA	GCAAAGCAAGTGAAGAACCANGG	GCAA-GtAcGTGAAGAAatAAGG	1	42260867	-	4	1
RNA	GCAAAGCAAGTGAAGAACCANGG	ca-AAGCtAGTGAAGAACCtGGG	3	6026744	+	4	1
RNA	GCAAAGCAAGTGAAGAACCANGG	caA-AGCtAGTGAAGAACCtGGG	3	6026744	+	4	1
RNA	GCAAAGCAAGTGAAGAACCANGG	caAA-GCtAGTGAAGAACCtGGG	3	6026744	+	4	1
RNA	GCAAAGCAAGTGAAGAACCANGG	Gt-AAtCAAGTcAAGAACgATGG	3	9169976	-	4	1
RNA	GCAAAGCAAGTGAAGAACCANGG	GtA-AtCAAGTcAAGAACgATGG	3	9169976	-	4	1
RNA	GCAAAGCAAGTGAAGAACCANGG	GtAA-tCAAGTcAAGAACgATGG	3	9169976	-	4	1
RNA	GCAAAGCAAGTGAAGAACCANGG	tt-AAtCAAGTGAtGAACCAAGG	3	9648062	-	4	1
RNA	GCAAAGCAAGTGAAGAACCANGG	ttA-AtCAAGTGAtGAACCAAGG	3	9648062	-	4	1
RNA	GCAAAGCAAGTGAAGAACCANGG	ttAA-tCAAGTGAtGAACCAAGG	3	9648062	-	4	1
RNA	GCAAAGCAAGTGAAGAACCANGG	Ga-AAGaAAtTaAAGAACCAAGG	3	20002428	-	4	1
RNA	GCAAAGCAAGTGAAGAACCANGG	GaA-AGaAAtTaAAGAACCAAGG	3	20002428	-	4	1
RNA	GCAAAGCAAGTGAAGAACCANGG	GaAA-GaAAtTaAAGAACCAAGG	3	20002428	-	4	1
RNA	GCAAAGCAAGTGAAGAACCANGG	Ga-AAcCAcGTGAAGAAtCAAGG	3	21653495	+	4	1
RNA	GCAAAGCAAGTGAAGAACCANGG	GaA-AcCAcGTGAAGAAtCAAGG	3	21653495	+	4	1
RNA	GCAAAGCAAGTGAAGAACCANGG	GaAA-cCAcGTGAAGAAtCAAGG	3	21653495	+	4	1
RNA	GCAAAGCAAGTGAAGAACCANGG	GC-AtGCAAGaGAAcAAaCATGG	3	30253220	-	4	1
RNA	GCAAAGCAAGTGAAGAACCANGG	GCA-tGCAAGaGAAcAAaCATGG	3	30253220	-	4	1
RNA	GCAAAGCAAGTGAAGAACCANGG	GCAt-GCAAGaGAAcAAaCATGG	3	30253220	-	4	1
RNA	GCAAAGCAAGTGAAGAACCANGG	GC-AtGCAAcaGAAGcACCAAGG	3	45547567	-	4	1
RNA	GCAAAGCAAGTGAAGAACCANGG	GCA-tGCAAcaGAAGcACCAAGG	3	45547567	-	4	1
RNA	GCAAAGCAAGTGAAGAACCANGG	GCAt-GCAAcaGAAGcACCAAGG	3	45547567	-	4	1
RNA	GCAAAGCAAGTGAAGAACCANGG	tC-AAGCAgaTGAAGAACCtAGG	3	53325397	-	4	1
RNA	GCAAAGCAAGTGAAGAACCANGG	tCA-AGCAgaTGAAGAACCtAGG	3	53325397	-	4	1
RNA	GCAAAGCAAGTGAAGAACCANGG	tCAA-GCAgaTGAAGAACCtAGG	3	53325397	-	4	1
RNA	GCAAAGCAAGTGAAGAACCANGG	tC-AAGCAAtTGcAGAAgCAGGG	4	1286082	+	4	1
RNA	GCAAAGCAAGTGAAGAACCANGG	tCA-AGCAAtTGcAGAAgCAGGG	4	1286082	+	4	1
RNA	GCAAAGCAAGTGAAGAACCANGG	tCAA-GCAAtTGcAGAAgCAGGG	4	1286082	+	4	1
RNA	GCAAAGCAAGTGAAGAACCANGG	aC-AAGCAAGTaAAaAACaAAGG	4	2668985	+	4	1
RNA	GCAAAGCAAGTGAAGAACCANGG	aCA-AGCAAGTaAAaAACaAAGG	4	2668985	+	4	1
RNA	GCAAAGCAAGTGAAGAACCANGG	aCAA-GCAAGTaAAaAACaAAGG	4	2668985	+	4	1
RNA	GCAAAGCAAGTGAAGAACCANGG	GC-tAGCAAGaGAAttACCATGG	4	4249060	-	4	1
RNA	GCAAAGCAAGTGAAGAACCANGG	GCt-AGCAAGaGAAttACCATGG	4	4249060	-	4	1
RNA	GCAAAGCAAGTGAAGAACCANGG	GCtA-GCAAGaGAAttACCATGG	4	4249060	-	4	1
RNA	GCAAAGCAAGTGAAGAACCANGG	Ga-AAGaAAGTGAAtAAgCAAGG	4	7918909	+	4	1
RNA	GCAAAGCAAGTGAAGAACCANGG	GaA-AGaAAGTGAAtAAgCAAGG	4	7918909	+	4	1
RNA	GCAAAGCAAGTGAAGAACCANGG	GaAA-GaAAGTGAAtAAgCAAGG	4	7918909	+	4	1
RNA	GCAAAGCAAGTGAAGAACCANGG	GC-AcGCgAGaGAAGAACaATGG	4	8837409	-	4	1
RNA	GCAAAGCAAGTGAAGAACCANGG	GCA-cGCgAGaGAAGAACaATGG	4	8837409	-	4	1
RNA	GCAAAGCAAGTGAAGAACCANGG	GCAc-GCgAGaGAAGAACaATGG	4	8837409	-	4	1
RNA	GCAAAGCAAGTGAAGAACCANGG	a-AAcGCAAGTcAAGAAtCATGG	scaffold1799	471	-	4	1
RNA	GCAAAGCAAGTGAAGAACCANGG	G-AcAtCAcGTGAAGAAtCAAGG	scaffold0282	22553	-	4	1
RNA	GCAAAGCAAGTGAAGAACCANGG	G-AtAGgAAtTGAAGAACtAGGG	scaffold0103	35216	-	4	1
RNA	GCAAAGCAAGTGAAGAACCANGG	c-AtAGgAAtTGAAGAACCAGGG	scaffold0032	70629	+	4	1
RNA	GCAAAGCAAGTGAAGAACCANGG	G-AAtGaAAGTGAAGAAaCtAGG	scaffold0018	137190	+	4	1
RNA	GCAAAGCAAGTGAAGAACCANGG	t-AAAGCAtcTGAAGAACtATGG	scaffold0010	108273	-	4	1
RNA	GCAAAGCAAGTGAAGAACCANGG	G-AgAatAAGTGAAtAACCATGG	6	76798	-	4	1
RNA	GCAAAGCAAGTGAAGAACCANGG	c-AcAGCAAGTGtAaAACCATGG	6	164208	-	4	1
RNA	GCAAAGCAAGTGAAGAACCANGG	G-AgAGaAAGTGAAGAAaaAAGG	6	1703635	+	4	1
RNA	GCAAAGCAAGTGAAGAACCANGG	G-AAAGtAAtgGAAGAAgCAAGG	6	4858521	+	4	1
RNA	GCAAAGCAAGTGAAGAACCANGG	G-AAAtCAtGTGAAaAACaAAGG	6	6947960	+	4	1
RNA	GCAAAGCAAGTGAAGAACCANGG	G-AAAGgAAGTGAAGAAaatAGG	6	14663787	-	4	1
RNA	GCAAAGCAAGTGAAGAACCANGG	a-AAAaCAAGTttAGAACCATGG	6	24290486	+	4	1
RNA	GCAAAGCAAGTGAAGAACCANGG	G-AAAaCAAtTcAAGAAaCATGG	6	33977982	-	4	1
RNA	GCAAAGCAAGTGAAGAACCANGG	G-AAAGagtGaGAAGAACCAAGG	5	1227586	-	4	1
RNA	GCAAAGCAAGTGAAGAACCANGG	G-AAcGagAGaGAAGAACCAAGG	5	5455462	-	4	1
RNA	GCAAAGCAAGTGAAGAACCANGG	G-AtAcCAAaTGAAGAAaCATGG	5	23330705	+	4	1
RNA	GCAAAGCAAGTGAAGAACCANGG	G-AAAtCAtGTGAAGgAtCAAGG	5	25680739	+	4	1
RNA	GCAAAGCAAGTGAAGAACCANGG	G-AAAttAtGTGAAtAACCAAGG	5	29426160	-	4	1
RNA	GCAAAGCAAGTGAAGAACCANGG	G-AAAGCAAGTaAAGAcaCgAGG	5	35042855	-	4	1
RNA	GCAAAGCAAGTGAAGAACCANGG	c-AAAGCAAtTGAAaAAtCAAGG	5	40362453	+	4	1
RNA	GCAAAGCAAGTGAAGAACCANGG	c-AAAGCAAtTGAAaAAtCAAGG	5	40409195	+	4	1
RNA	GCAAAGCAAGTGAAGAACCANGG	a-AAAGCAAtTGAAaAAtCAAGG	5	40457334	-	4	1
RNA	GCAAAGCAAGTGAAGAACCANGG	G-gAAGCAAtTtAAGAACCtAGG	5	40780089	+	4	1
RNA	GCAAAGCAAGTGAAGAACCANGG	a-AAtGCAAtTGAAGAAtCAAGG	5	40597584	-	4	1
RNA	GCAAAGCAAGTGAAGAACCANGG	c-AAAGCAgGaGtAGAACCACGG	5	42720512	-	4	1
RNA	GCAAAGCAAGTGAAGAACCANGG	c-AAAaCAcGTGAAtAACCACGG	8	1802412	+	4	1
RNA	GCAAAGCAAGTGAAGAACCANGG	G-AAAGCAgtaGAAGAAaCATGG	8	7034447	-	4	1
RNA	GCAAAGCAAGTGAAGAACCANGG	G-AcAaCAAGTGAtGAAtCAGGG	8	11673802	-	4	1
RNA	GCAAAGCAAGTGAAGAACCANGG	t-AAAaCAAGTcAAGAACCtTGG	8	27072189	+	4	1
RNA	GCAAAGCAAGTGAAGAACCANGG	G-AAAGaAAaTGAAcAACaAGGG	8	29203913	+	4	1
RNA	GCAAAGCAAGTGAAGAACCANGG	G-AAAGaAAGaGtAGAACgACGG	8	33729256	+	4	1
RNA	GCAAAGCAAGTGAAGAACCANGG	G-AAAGaAAGaGcAGAACtATGG	8	39047145	+	4	1
RNA	GCAAAGCAAGTGAAGAACCANGG	G-AAAGaAAtTGAAGAAtaATGG	8	39499186	+	4	1
RNA	GCAAAGCAAGTGAAGAACCANGG	t-AAAaCAAGgGAAGAtCCAGGG	2	3146179	-	4	1
RNA	GCAAAGCAAGTGAAGAACCANGG	G-AAAcCAAGgGtAGtACCAAGG	2	4582762	+	4	1
RNA	GCAAAGCAAGTGAAGAACCANGG	c-AAAGCtAGTGcAGcACCAAGG	2	6552267	-	4	1
RNA	GCAAAGCAAGTGAAGAACCANGG	G-AtAGgAAGTaAAcAACCAAGG	2	10635407	-	4	1
RNA	GCAAAGCAAGTGAAGAACCANGG	G-AgAtCAAGTGAtcAACCATGG	2	11215299	+	4	1
RNA	GCAAAGCAAGTGAAGAACCANGG	G-AgcGCAcGaGAAGAACCAAGG	2	13624544	+	4	1
RNA	GCAAAGCAAGTGAAGAACCANGG	a-AAAaCAAGTGAAGAAaaAAGG	2	24183715	-	4	1
RNA	GCAAAGCAAGTGAAGAACCANGG	G-AcAtCAtGTGAAGAAtCAAGG	2	25474189	+	4	1
RNA	GCAAAGCAAGTGAAGAACCANGG	G-AAAaCAAtTcAAGAAaCATGG	2	28608287	-	4	1
RNA	GCAAAGCAAGTGAAGAACCANGG	G-AtAtCAAGTGAAGgAtCAAGG	2	30998923	+	4	1
RNA	GCAAAGCAAGTGAAGAACCANGG	G-AtAtgAgGTGAAGAACCAGGG	2	39667127	+	4	1
RNA	GCAAAGCAAGTGAAGAACCANGG	G-AAAaCAAGTGAAcAAatAAGG	2	41511166	+	4	1
RNA	GCAAAGCAAGTGAAGAACCANGG	G-AAAaCAAcTGtAGAAtCAAGG	7	63877	+	4	1
RNA	GCAAAGCAAGTGAAGAACCANGG	G-AAAGgAAGaGAAGAAtgAAGG	7	767717	+	4	1
RNA	GCAAAGCAAGTGAAGAACCANGG	G-AAttCAAGTGgAGAACaAGGG	7	1596207	+	4	1
RNA	GCAAAGCAAGTGAAGAACCANGG	G-AcAtCAtGTGAAGAAtCAAGG	7	2630416	-	4	1
RNA	GCAAAGCAAGTGAAGAACCANGG	a-AAcaCAAGTGAAGgACCATGG	7	7282145	-	4	1
RNA	GCAAAGCAAGTGAAGAACCANGG	G-AcAtCAcGTGAAGAAtCAAGG	7	8308972	-	4	1
RNA	GCAAAGCAAGTGAAGAACCANGG	G-AgAGCAAGaGAAaAACtAGGG	7	10673258	-	4	1
RNA	GCAAAGCAAGTGAAGAACCANGG	G-AcAtCAAGTGAAGgAtCAAGG	7	20461588	-	4	1
RNA	GCAAAGCAAGTGAAGAACCANGG	G-AAAaCAtGTGAtGAAtCAGGG	7	31989345	-	4	1
RNA	GCAAAGCAAGTGAAGAACCANGG	G-AAAtCctGgGAAGAACCAGGG	7	32420911	+	4	1
RNA	GCAAAGCAAGTGAAGAACCANGG	a-AAAGgAAGaGAAGAACaAGGG	7	32988417	+	4	1
RNA	GCAAAGCAAGTGAAGAACCANGG	G-ttAGacAGTGAAGAACCAGGG	7	34372131	+	4	1
RNA	GCAAAGCAAGTGAAGAACCANGG	G-AtAtCAAtTGAAGAAtCATGG	7	37329326	-	4	1
RNA	GCAAAGCAAGTGAAGAACCANGG	G-tAgGCAAGgGAAGAACaAAGG	1	6542667	-	4	1
RNA	GCAAAGCAAGTGAAGAACCANGG	G-gAAGgAAGgaAAGAACCAAGG	1	7281604	+	4	1
RNA	GCAAAGCAAGTGAAGAACCANGG	G-AtAaCAtGTGAAGAAtCATGG	1	10977419	+	4	1
RNA	GCAAAGCAAGTGAAGAACCANGG	G-AAAGCAAaTaAAtAAaCAAGG	1	12638870	+	4	1
RNA	GCAAAGCAAGTGAAGAACCANGG	c-AAtGaAAGaGAAGAACCAAGG	1	13074669	-	4	1
RNA	GCAAAGCAAGTGAAGAACCANGG	c-AAtGCAAGTGttGAACCATGG	1	15447032	+	4	1
RNA	GCAAAGCAAGTGAAGAACCANGG	t-cAAGCAtGTGAAGAAtCACGG	1	16121348	+	4	1
X	GCAAAGCAAGTGAAGAACCANGG	tCAcAGCAAGTGtAaAACCATGG	4	18208177	+	4	0
X	GCAAAGCAAGTGAAGAACCANGG	GCAAtGCAAGaGAtGAgCCATGG	4	20724821	+	4	0
X	GCAAAGCAAGTGAAGAACCANGG	GCAgAtCAAGTGAAGAtaCATGG	4	22039555	+	4	0
X	GCAAAGCAAGTGAAGAACCANGG	GtAAcaCcAGTGAAGAACCAAGG	4	30881202	+	4	0
X	GCAAAGCAAGTGAAGAACCANGG	GtAAcaCcAGTGAAGAACCAAGG	4	30892285	+	4	0
X	GCAAAGCAAGTGAAGAACCANGG	GtAAcaCcAGTGAAGAACCAAGG	4	30720133	-	4	0
X	GCAAAGCAAGTGAAGAACCANGG	GCAAAGagAGTGAAGAAaCcAGG	4	43094875	+	4	0
X	GCAAAGCAAGTGAAGAACCANGG	cCAAAtCAAaTGAAGAACaAGGG	4	49806929	+	4	0
DNA	GCAAAGCAAGTGAAGAACC-ANGG	GCAgAtCtAGTGAAGgACCTATGG	scaffold0362	4955	+	4	1
DNA	GCAAAGCAAGTGAAGAACC-ANGG	tCAAAGCAAaTGAtGAACaAATGG	6	11741232	+	4	1
DNA	GCAAAGCAAGTGAAGAACC-ANGG	GtAAAGCcAaTtAAGAACCCAGGG	6	29485897	+	4	1
DNA	GCAAAGCAAGTGAAGAACC-ANGG	GCAAAGCAAaTGAgGtAtCTAAGG	5	8016731	+	4	1
DNA	GCAAAGCAAGTGAAGAACC-ANGG	cCAAAtCAtGTcAAGAACCAAAGG	5	22451832	-	4	1
DNA	GCAAAGCAAGTGAAGAACC-ANGG	GCcAAaCAAaTGAAcAACCCACGG	5	39448347	+	4	1
DNA	GCAAAGCAAGTGAAGAACC-ANGG	GCAAtGCAAcTGAtGAAgCAAGGG	8	32291904	+	4	1
DNA	GCAAAGCAAGTGAAGAACC-ANGG	GCAAgaCAAGTGAgGAAtCCATGG	2	1414020	-	4	1
DNA	GCAAAGCAAGTGAAGAACC-ANGG	GCAAAGtcAaaGAAGAACCAACGG	7	4041858	+	4	1
DNA	GCAAAGCAAGTGAAGAACC-ANGG	GCAAAGaAAGTGtAGtACaAATGG	7	16817139	+	4	1
DNA	GCAAAGCAAGTGAAGAACC-ANGG	GCAAAtCtAGTGAAGcACaTATGG	7	22657088	-	4	1
DNA	GCAAAGCAAGTGAAGAACC-ANGG	aCAAAGCAAaTGgAGAACtCAGGG	7	33148250	-	4	1
DNA	GCAAAGCAAGTGAAGAACC-ANGG	cCAAAGCAAGTGAAGAgtCTtTGG	7	43206035	-	4	1
DNA	GCAAAGCAAGTGAAGAACC-ANGG	GgAAAGgAAaTGAAGAACaTAAGG	1	18624093	-	4	1
DNA	GCAAAGCAAGTGAAGAACC-ANGG	GCAAAaCgAGTcAAGtACCAAAGG	1	43265559	-	4	1
DNA	GCAAAGCAAGTGAAGAACC-ANGG	GgAAAGaAAtTaAAGAACCAAGGG	3	20002427	-	4	1
DNA	GCAAAGCAAGTGAAGAACC-ANGG	GaAAAGCAAagGcAGAACCAAAGG	3	43702665	+	4	1
DNA	GCAAAGCAAGTGAAGAAC-CANGG	tCAAAGCAAaTGAtGAACAaATGG	6	11741232	+	4	1
DNA	GCAAAGCAAGTGAAGAAC-CANGG	GtAAAGCcAaTtAAGAACCCAGGG	6	29485897	+	4	1
DNA	GCAAAGCAAGTGAAGAAC-CANGG	GgAAAtCAAGTGAAGAtgGCATGG	5	7322799	-	4	1
DNA	GCAAAGCAAGTGAAGAAC-CANGG	aCAAAGaAAGTGAAGAgaGCAAGG	5	38536963	-	4	1
DNA	GCAAAGCAAGTGAAGAAC-CANGG	GCcAAaCAAaTGAAcAACCCACGG	5	39448347	+	4	1
DNA	GCAAAGCAAGTGAAGAAC-CANGG	GaAAAtCAAcTaAAGAACTCATGG	8	38521195	+	4	1
DNA	GCAAAGCAAGTGAAGAAC-CANGG	GCAAgaCAAGTGAgGAAtCCATGG	2	1414020	-	4	1
DNA	GCAAAGCAAGTGAAGAAC-CANGG	GCAAAtCAAagaAAGAACGCAAGG	2	9940800	-	4	1
DNA	GCAAAGCAAGTGAAGAAC-CANGG	GCAAAcaAAGTtAAGAAaGCAAGG	2	43762470	+	4	1
DNA	GCAAAGCAAGTGAAGAAC-CANGG	GCAAAGaAAGTGtAGtACAaATGG	7	16817139	+	4	1
DNA	GCAAAGCAAGTGAAGAAC-CANGG	GCAAAtCtAGTGAAGcACAtATGG	7	22657088	-	4	1
DNA	GCAAAGCAAGTGAAGAAC-CANGG	GgAAAGgAAaTGAAGAACAtAAGG	1	18624093	-	4	1
DNA	GCAAAGCAAGTGAAGAAC-CANGG	GaAAAtCAAcTaAAGAACTCATGG	3	2338785	+	4	1
DNA	GCAAAGCAAGTGAAGAAC-CANGG	GgAAAtCAAGTGAAGAtgGCATGG	3	2716618	+	4	1
DNA	GCAAAGCAAGTGAAGAAC-CANGG	GaAAAtCAAcTaAAGAACTCATGG	4	13740221	+	4	1
DNA	GCAAAGCAAGTGAAGAAC-CANGG	GaAAAtCAAcTaAAGAACTCATGG	4	23218189	+	4	1
DNA	GCAAAGCAAGTGAAGAAC-CANGG	GtAAAaCcAGTGAAGAAgACAAGG	4	25613562	-	4	1
DNA	GCAAAGCAAGTGAAGAA-CCANGG	tCAAAGCAAaTGtAaAAACCAGGG	6	3899243	+	4	1
DNA	GCAAAGCAAGTGAAGAA-CCANGG	GtAAAGCcAaTtAAGAACCCAGGG	6	29485897	+	4	1
DNA	GCAAAGCAAGTGAAGAA-CCANGG	GgAAAtCAAGTGAAGAtGgCATGG	5	7322799	-	4	1
DNA	GCAAAGCAAGTGAAGAA-CCANGG	GCAAAGCAAaTGAgGtATCtAAGG	5	8016731	+	4	1
DNA	GCAAAGCAAGTGAAGAA-CCANGG	GCAtAGCAAGTGAAGcACaaAAGG	5	11834524	+	4	1
DNA	GCAAAGCAAGTGAAGAA-CCANGG	GCAtAGCAAGTGAAGcACagAAGG	5	11882136	+	4	1
DNA	GCAAAGCAAGTGAAGAA-CCANGG	GCAtAGCAAGTGAAGcACaaAAGG	5	11748405	-	4	1
DNA	GCAAAGCAAGTGAAGAA-CCANGG	aCAAAGaAAGTGAAGAgAgCAAGG	5	38536963	-	4	1
DNA	GCAAAGCAAGTGAAGAA-CCANGG	GCcAAaCAAaTGAAcAACCCACGG	5	39448347	+	4	1
DNA	GCAAAGCAAGTGAAGAA-CCANGG	GCAAtGCAAcTGAtGAAGCaAGGG	8	32291904	+	4	1
DNA	GCAAAGCAAGTGAAGAA-CCANGG	GCAAAaCAAcaGAAcAAACCAAGG	2	23157061	+	4	1
DNA	GCAAAGCAAGTGAAGAA-CCANGG	GCAAAaCAAcaGAAcAAACCAAGG	2	23568318	+	4	1
DNA	GCAAAGCAAGTGAAGAA-CCANGG	GCAAAGCAgGaaAgGAAACCATGG	2	23719248	+	4	1
DNA	GCAAAGCAAGTGAAGAA-CCANGG	GCAAAGCAgGaaAgGAAACCATGG	2	24106920	+	4	1
DNA	GCAAAGCAAGTGAAGAA-CCANGG	tgAAAGaAAGTGAAGtATCCATGG	2	40784451	+	4	1
DNA	GCAAAGCAAGTGAAGAA-CCANGG	GCAAAcaAAGTtAAGAAAgCAAGG	2	43762470	+	4	1
DNA	GCAAAGCAAGTGAAGAA-CCANGG	aaAAAaCAAGTtAAGAAGCCAAGG	7	18949983	+	4	1
DNA	GCAAAGCAAGTGAAGAA-CCANGG	GCAAAaCAAGTGAgGgAACCtGGG	7	32256143	-	4	1
DNA	GCAAAGCAAGTGAAGAA-CCANGG	aCAAAGCAAaTGgAGAACtCAGGG	7	33148250	-	4	1
DNA	GCAAAGCAAGTGAAGAA-CCANGG	cCAAAGCAAGTGAAGAgTCttTGG	7	43206035	-	4	1
DNA	GCAAAGCAAGTGAAGAA-CCANGG	GgAAAtCAAGTGAAGAtGgCATGG	3	2716618	+	4	1
DNA	GCAAAGCAAGTGAAGAA-CCANGG	GCAtAaaAAGTGAtGAAGCCATGG	4	16578127	-	4	1
DNA	GCAAAGCAAGTGAAGAA-CCANGG	GtAAAaCcAGTGAAGAAGaCAAGG	4	25613562	-	4	1
DNA	GCAAAGCAAGTGAAGAA-CCANGG	GgcAAGCAAcTGAAGAAACCcTGG	4	42583168	+	4	1
DNA	GCAAAGCAAGTGAAGA-ACCANGG	GCAAAcCAAaTGAtGAGACaAGGG	scaffold0069	36877	+	4	1
DNA	GCAAAGCAAGTGAAGA-ACCANGG	tCAAAGCAAaTGtAaAAACCAGGG	6	3899243	+	4	1
DNA	GCAAAGCAAGTGAAGA-ACCANGG	tCAAAcCAAaTGAAtATACCATGG	6	20816756	-	4	1
DNA	GCAAAGCAAGTGAAGA-ACCANGG	tCAAAcCAAaTGAAtATACCATGG	6	20799453	-	4	1
DNA	GCAAAGCAAGTGAAGA-ACCANGG	GgAAAtCAAGTGAAGATggCATGG	5	7322799	-	4	1
DNA	GCAAAGCAAGTGAAGA-ACCANGG	GCAAAGCtAGgGAAaATAtCATGG	5	16982939	+	4	1
DNA	GCAAAGCAAGTGAAGA-ACCANGG	GCAAAGCAAactAAGACACaAAGG	5	25798482	-	4	1
DNA	GCAAAGCAAGTGAAGA-ACCANGG	GCAAAGtAAGTaAAaAGAgCAAGG	8	9738522	-	4	1
DNA	GCAAAGCAAGTGAAGA-ACCANGG	GCAAgaCAAGTGAgGAAtCCATGG	2	1414020	-	4	1
DNA	GCAAAGCAAGTGAAGA-ACCANGG	GCAAAGCAAtTGAAttGACaAAGG	2	3657678	-	4	1
DNA	GCAAAGCAAGTGAAGA-ACCANGG	GCAAAaCAAcaGAAcAAACCAAGG	2	23157061	+	4	1
DNA	GCAAAGCAAGTGAAGA-ACCANGG	GCAAAaCAAcaGAAcAAACCAAGG	2	23568318	+	4	1
DNA	GCAAAGCAAGTGAAGA-ACCANGG	GCAAAGCAgGaaAgGAAACCATGG	2	23719248	+	4	1
DNA	GCAAAGCAAGTGAAGA-ACCANGG	GCAAAGCAgGaaAgGAAACCATGG	2	24106920	+	4	1
DNA	GCAAAGCAAGTGAAGA-ACCANGG	GCAAAcaAAGTtAAGAAAgCAAGG	2	43762470	+	4	1
DNA	GCAAAGCAAGTGAAGA-ACCANGG	GCAAAcCAAGTGtAGcGACCgAGG	7	3203514	-	4	1
DNA	GCAAAGCAAGTGAAGA-ACCANGG	GCAAAGCAAtTGAAGtTACgtAGG	7	24190222	-	4	1
DNA	GCAAAGCAAGTGAAGA-ACCANGG	GCAAAaCAAGTGAgGgAACCtGGG	7	32256143	-	4	1
DNA	GCAAAGCAAGTGAAGA-ACCANGG	cCAAAGCAAGTGAAGAGtCttTGG	7	43206035	-	4	1
DNA	GCAAAGCAAGTGAAGA-ACCANGG	tCAAAGCAAGTGAAaAGAaaAGGG	1	23771404	+	4	1
DNA	GCAAAGCAAGTGAAGA-ACCANGG	GtAAAGaAAaaGAAGACACCAAGG	1	35344925	+	4	1
DNA	GCAAAGCAAGTGAAGA-ACCANGG	GaAAAcCAAGcGAAGACAgCAAGG	1	40851692	-	4	1
DNA	GCAAAGCAAGTGAAGA-ACCANGG	GgAAAtCAAGTGAAGATggCATGG	3	2716618	+	4	1
DNA	GCAAAGCAAGTGAAGA-ACCANGG	cCAAtGaAAGTGAAGtGACCATGG	3	50023163	-	4	1
DNA	GCAAAGCAAGTGAAGA-ACCANGG	GCAAAGCAAtTGAAttTAaCAAGG	4	11694192	+	4	1
DNA	GCAAAGCAAGTGAAGA-ACCANGG	GgcAAGCAAcTGAAGAAACCcTGG	4	42583168	+	4	1
DNA	GCAAAGCAAGTGAAGA-ACCANGG	GCtAAGaAAGaGAAGATAaCAAGG	4	55565520	-	4	1
DNA	GCAAAGCAAGTGAAG-AACCANGG	tCAAAGCAAaTGtAaAAACCAGGG	6	3899243	+	4	1
DNA	GCAAAGCAAGTGAAG-AACCANGG	tCAAAGCAAGTGtttGAACCAAGG	6	8139700	+	4	1
DNA	GCAAAGCAAGTGAAG-AACCANGG	GCAAAtCAAGaGAAGCAAaaATGG	6	14860264	+	4	1
DNA	GCAAAGCAAGTGAAG-AACCANGG	GCAAAGtAAaTGAAtTAAaCATGG	6	22755880	-	4	1
DNA	GCAAAGCAAGTGAAG-AACCANGG	GCAAAGCAAaTGAgGTAtCtAAGG	5	8016731	+	4	1
DNA	GCAAAGCAAGTGAAG-AACCANGG	GgAAAGCAAaTtAAGCAAgCAGGG	5	9022236	+	4	1
DNA	GCAAAGCAAGTGAAG-AACCANGG	GCAtAGCAAGTGAAGCAcaaAAGG	5	11834524	+	4	1
DNA	GCAAAGCAAGTGAAG-AACCANGG	GCAtAGCAAGTGAAGCAcagAAGG	5	11882136	+	4	1
DNA	GCAAAGCAAGTGAAG-AACCANGG	GCAtAGCAAGTGAAGCAcaaAAGG	5	11748405	-	4	1
DNA	GCAAAGCAAGTGAAG-AACCANGG	aCAAAGaAAGTGAAGAgAgCAAGG	5	38536963	-	4	1
DNA	GCAAAGCAAGTGAAG-AACCANGG	GtgAAaCAAGTGAAGGAAtCATGG	8	34105666	+	4	1
DNA	GCAAAGCAAGTGAAG-AACCANGG	GCAAAGgcAGTGAAaGAAaCATGG	8	42517739	-	4	1
DNA	GCAAAGCAAGTGAAG-AACCANGG	GCAAgaCAAGTGAgGAAtCCATGG	2	1414020	-	4	1
DNA	GCAAAGCAAGTGAAG-AACCANGG	GCAAAGCAAtTGAAtTgACaAAGG	2	3657678	-	4	1
DNA	GCAAAGCAAGTGAAG-AACCANGG	tCAAAcCAAacGAAGTAACCATGG	2	7397643	-	4	1
DNA	GCAAAGCAAGTGAAG-AACCANGG	GCAAAGCAAcacAgGGAACCAAGG	2	19706569	-	4	1
DNA	GCAAAGCAAGTGAAG-AACCANGG	GCAAAaCAAcaGAAcAAACCAAGG	2	23157061	+	4	1
DNA	GCAAAGCAAGTGAAG-AACCANGG	GCAAAaCAAcaGAAcAAACCAAGG	2	23568318	+	4	1
DNA	GCAAAGCAAGTGAAG-AACCANGG	GCAAAGCAgGaaAgGAAACCATGG	2	23719248	+	4	1
DNA	GCAAAGCAAGTGAAG-AACCANGG	GCAAAGCAgGaaAgGAAACCATGG	2	24106920	+	4	1
DNA	GCAAAGCAAGTGAAG-AACCANGG	tgAAAGaAAGTGAAGTAtCCATGG	2	40784451	+	4	1
DNA	GCAAAGCAAGTGAAG-AACCANGG	GCAAAcaAAGTtAAGAAAgCAAGG	2	43762470	+	4	1
DNA	GCAAAGCAAGTGAAG-AACCANGG	GCAAAcCAAGTGtAGCgACCgAGG	7	3203514	-	4	1
DNA	GCAAAGCAAGTGAAG-AACCANGG	GCAAAGCAAtTGAAGTtACgtAGG	7	24190222	-	4	1
DNA	GCAAAGCAAGTGAAG-AACCANGG	aCAAAGaAAGTtAAGTAAgCAAGG	7	40406389	+	4	1
DNA	GCAAAGCAAGTGAAG-AACCANGG	aCtAAGCAAGTGAtGGAAaCAAGG	1	37338877	+	4	1
DNA	GCAAAGCAAGTGAAG-AACCANGG	GggAAGCAAGatAAGGAACCAGGG	3	46891022	+	4	1
DNA	GCAAAGCAAGTGAAG-AACCANGG	cCAAtGaAAGTGAAGTgACCATGG	3	50023163	-	4	1
DNA	GCAAAGCAAGTGAAG-AACCANGG	GCAAAGCAAtTGAAtTtAaCAAGG	4	11694192	+	4	1
DNA	GCAAAGCAAGTGAAG-AACCANGG	GgcAAGCAAcTGAAGAAACCcTGG	4	42583168	+	4	1
DNA	GCAAAGCAAGTGAAG-AACCANGG	GCAAAGCAAtTGgAGCAAtgAAGG	4	47396008	-	4	1
DNA	GCAAAGCAAGTGAA-GAACCANGG	tCAAAGCAAaTGtAAaAACCAGGG	6	3899243	+	4	1
DNA	GCAAAGCAAGTGAA-GAACCANGG	GCAAAGtAAaTGAATtAAaCATGG	6	22755880	-	4	1
DNA	GCAAAGCAAGTGAA-GAACCANGG	GtgAAaCAAGTGAAGGAAtCATGG	8	34105666	+	4	1
DNA	GCAAAGCAAGTGAA-GAACCANGG	GCAAAGCAAtTGAATtgACaAAGG	2	3657678	-	4	1
DNA	GCAAAGCAAGTGAA-GAACCANGG	GCAAAGCAAcacAgGGAACCAAGG	2	19706569	-	4	1
DNA	GCAAAGCAAGTGAA-GAACCANGG	GCAAAaCAAcaGAACaAACCAAGG	2	23157061	+	4	1
DNA	GCAAAGCAAGTGAA-GAACCANGG	GCAAAaCAAcaGAACaAACCAAGG	2	23568318	+	4	1
DNA	GCAAAGCAAGTGAA-GAACCANGG	GCAAAGCtAcgGAcTGAACCAAGG	7	2562235	+	4	1
DNA	GCAAAGCAAGTGAA-GAACCANGG	GCAAAGCtAcgGAcTGAACCAAGG	7	2548349	+	4	1
DNA	GCAAAGCAAGTGAA-GAACCANGG	GCAAAGCAAGTGAAAGAggttCGG	1	8187105	-	4	1
DNA	GCAAAGCAAGTGAA-GAACCANGG	GaAAAtgAAGgGAACGAACCATGG	1	29779233	-	4	1
DNA	GCAAAGCAAGTGAA-GAACCANGG	aCtAAGCAAGTGAtGGAAaCAAGG	1	37338877	+	4	1
DNA	GCAAAGCAAGTGAA-GAACCANGG	GgAAAttAAGaGAAAGAACCAAGG	3	5376360	+	4	1
DNA	GCAAAGCAAGTGAA-GAACCANGG	GCAAAGCtAcgGAcTGAACCAAGG	3	11934671	-	4	1
DNA	GCAAAGCAAGTGAA-GAACCANGG	GCAAAGCtAcgGAcTGAACCAAGG	3	11920100	-	4	1
DNA	GCAAAGCAAGTGAA-GAACCANGG	GggAAGCAAGatAAGGAACCAGGG	3	46891022	+	4	1
DNA	GCAAAGCAAGTGAA-GAACCANGG	GCAAAGCAAtTGAATttAaCAAGG	4	11694192	+	4	1
DNA	GCAAAGCAAGTGAA-GAACCANGG	GCAAAGCAAGTtcATGAtCCcAGG	4	44553394	-	4	1
DNA	GCAAAGCAAGTGA-AGAACCANGG	GgAAAcCAAGTcACAaAACCAGGG	scaffold0505	9434	-	4	1
DNA	GCAAAGCAAGTGA-AGAACCANGG	GCAAAtCAAGgcACAGAAgCAAGG	scaffold0003	62268	+	4	1
DNA	GCAAAGCAAGTGA-AGAACCANGG	tCAAAGCAAaTGtAAaAACCAGGG	6	3899243	+	4	1
DNA	GCAAAGCAAGTGA-AGAACCANGG	GCAAAtCAAGgcACAGAAgCAAGG	6	27425070	-	4	1
DNA	GCAAAGCAAGTGA-AGAACCANGG	GCAgcGCcAGTGAGAGAAtCAAGG	5	7519966	-	4	1
DNA	GCAAAGCAAGTGA-AGAACCANGG	GtAAAcCAcaTGAGAGAACCATGG	5	18113878	-	4	1
DNA	GCAAAGCAAGTGA-AGAACCANGG	cCcAAGCctGTGACAGAACCAAGG	8	11319792	+	4	1
DNA	GCAAAGCAAGTGA-AGAACCANGG	GCAAAGCAAcaaAGAaAACCAAGG	8	19465276	-	4	1
DNA	GCAAAGCAAGTGA-AGAACCANGG	GCAAAGCAAcaaAGAaAACCAAGG	8	19562956	-	4	1
DNA	GCAAAGCAAGTGA-AGAACCANGG	GCAAAaCAAGTtACAGAgaCAGGG	2	2100793	+	4	1
DNA	GCAAAGCAAGTGA-AGAACCANGG	GCAAAGCAAcacAGgGAACCAAGG	2	19706569	-	4	1
DNA	GCAAAGCAAGTGA-AGAACCANGG	GCAAAGCtAcgGACtGAACCAAGG	7	2548349	+	4	1
DNA	GCAAAGCAAGTGA-AGAACCANGG	GCAAAGCtAcgGACtGAACCAAGG	7	2562235	+	4	1
DNA	GCAAAGCAAGTGA-AGAACCANGG	GCAAAGCAAGTGAAAGAggttCGG	1	8187105	-	4	1
DNA	GCAAAGCAAGTGA-AGAACCANGG	GCAAAGCAAcaaAGAaAACCAAGG	1	22010266	-	4	1
DNA	GCAAAGCAAGTGA-AGAACCANGG	GCAAAGCAAcaaAGAaAACCAAGG	1	22003995	-	4	1
DNA	GCAAAGCAAGTGA-AGAACCANGG	aCtAAGCAAGTGATgGAAaCAAGG	1	37338877	+	4	1
DNA	GCAAAGCAAGTGA-AGAACCANGG	GCAAtcCAAGgGATAaAACCAAGG	1	38586325	-	4	1
DNA	GCAAAGCAAGTGA-AGAACCANGG	GgAAAttAAGaGAAAGAACCAAGG	3	5376360	+	4	1
DNA	GCAAAGCAAGTGA-AGAACCANGG	GCAAAGCtAcgGACtGAACCAAGG	3	11920100	-	4	1
DNA	GCAAAGCAAGTGA-AGAACCANGG	GCAAAGCtAcgGACtGAACCAAGG	3	11934671	-	4	1
DNA	GCAAAGCAAGTGA-AGAACCANGG	GCAAAGCAAGTGgTAGcAaCtGGG	3	26033427	-	4	1
DNA	GCAAAGCAAGTGA-AGAACCANGG	cCAAAGgAAGTGAGAGAAttAAGG	3	55169640	+	4	1
DNA	GCAAAGCAAGTGA-AGAACCANGG	GCAAAtCAAGgcACAGAAgCAAGG	4	18076460	+	4	1
DNA	GCAAAGCAAGTGA-AGAACCANGG	GaAAAGCAAaTaACAGcACCAGGG	4	35587239	+	4	1
DNA	GCAAAGCAAGTGA-AGAACCANGG	GCAAAGagAGTGAAgaAACCAGGG	4	43094875	+	4	1
DNA	GCAAAGCAAGTG-AAGAACCANGG	GCAAcGCAAaTaTAAGAAgCAAGG	8	11827726	+	4	1
DNA	GCAAAGCAAGTG-AAGAACCANGG	GCgAAGCAAtTtGAAGAACgATGG	2	39473500	-	4	1
DNA	GCAAAGCAAGTG-AAGAACCANGG	GCAAAaCAAGTGAggGAACCtGGG	7	32256143	-	4	1
DNA	GCAAAGCAAGTG-AAGAACCANGG	GCAAttCAAGTtCAAGAAtCATGG	7	37083062	-	4	1
DNA	GCAAAGCAAGTG-AAGAACCANGG	GCAAAGCAAGTGAAAGAggttCGG	1	8187105	-	4	1
DNA	GCAAAGCAAGTG-AAGAACCANGG	GaAAtGCAAaTGGAAGAACaACGG	1	8862450	-	4	1
DNA	GCAAAGCAAGTG-AAGAACCANGG	GgAAAttAAGaGAAAGAACCAAGG	3	5376360	+	4	1
DNA	GCAAAGCAAGTG-AAGAACCANGG	GCAAttCAAGTtCAAGAAtCATGG	3	11002912	+	4	1
DNA	GCAAAGCAAGTG-AAGAACCANGG	GCAAAGCAAGTGGtAGcAaCtGGG	3	26033427	-	4	1
DNA	GCAAAGCAAGTG-AAGAACCANGG	GCAAAGagAGTGAAgaAACCAGGG	4	43094875	+	4	1
DNA	GCAAAGCAAGTG-AAGAACCANGG	GCAAAGCAAGTtCAtGAtCCcAGG	4	44553394	-	4	1
DNA	GCAAAGCAAGT-GAAGAACCANGG	GCcAAGCAAtaTGAAGAAtCAAGG	scaffold0111	42913	+	4	1
DNA	GCAAAGCAAGT-GAAGAACCANGG	GaAAAGgAAcTTGAAGAAtCAAGG	scaffold0103	34069	-	4	1
DNA	GCAAAGCAAGT-GAAGAACCANGG	GaAAcGCgAtTTGAAGAACCAGGG	scaffold0002	462214	+	4	1
DNA	GCAAAGCAAGT-GAAGAACCANGG	tCAAAGCAAaTGtAAaAACCAGGG	6	3899243	+	4	1
DNA	GCAAAGCAAGT-GAAGAACCANGG	tCAAAGCAAGTGtttGAACCAAGG	6	8139700	+	4	1
DNA	GCAAAGCAAGT-GAAGAACCANGG	caAAAGCAAGcAGAAGAAtCAAGG	6	29566840	+	4	1
DNA	GCAAAGCAAGT-GAAGAACCANGG	caAAAGCAAGcAGAAGAAtCAAGG	6	29582247	+	4	1
DNA	GCAAAGCAAGT-GAAGAACCANGG	GgAAAGaAAGaTGAAGAtCCATGG	5	3412874	-	4	1
DNA	GCAAAGCAAGT-GAAGAACCANGG	aCAAAGCAgGaAGAAGAACaAGGG	5	33976018	-	4	1
DNA	GCAAAGCAAGT-GAAGAACCANGG	GaAAcGCgAtTTGAAGAACCAGGG	5	35900681	-	4	1
DNA	GCAAAGCAAGT-GAAGAACCANGG	GCAAcGCAAaTAtAAGAAgCAAGG	8	11827726	+	4	1
DNA	GCAAAGCAAGT-GAAGAACCANGG	aCAAAtCAAGTAGAAGAtgCAAGG	8	31301707	+	4	1
DNA	GCAAAGCAAGT-GAAGAACCANGG	GCAAAGgcAGTGaAAGAAaCATGG	8	42517739	-	4	1
DNA	GCAAAGCAAGT-GAAGAACCANGG	GCAAAGaAAtTTGAAGAcCCgGGG	2	12107998	-	4	1
DNA	GCAAAGCAAGT-GAAGAACCANGG	GaAAcGCgAtTTGAAGAACCAGGG	2	30194227	+	4	1
DNA	GCAAAGCAAGT-GAAGAACCANGG	GagAAGCAAtTTGAAGAACgATGG	2	39222812	+	4	1
DNA	GCAAAGCAAGT-GAAGAACCANGG	GagAAGCAAtTTGAAGAACgATGG	2	39414873	-	4	1
DNA	GCAAAGCAAGT-GAAGAACCANGG	GCcAAGCAAGaAGAAGAAttAAGG	2	41247182	+	4	1
DNA	GCAAAGCAAGT-GAAGAACCANGG	aCAAAGCAtGTAGAAtAtCCACGG	2	41901355	-	4	1
DNA	GCAAAGCAAGT-GAAGAACCANGG	GCtAAaCAAcTAGAAGAACaACGG	7	27948202	+	4	1
DNA	GCAAAGCAAGT-GAAGAACCANGG	GCAAttCAAGTTcAAGAAtCATGG	7	37083062	-	4	1
DNA	GCAAAGCAAGT-GAAGAACCANGG	GaAAtGCAAaTGGAAGAACaACGG	1	8862450	-	4	1
DNA	GCAAAGCAAGT-GAAGAACCANGG	GaAAcGCgAtTTGAAGAACCAGGG	1	16994962	-	4	1
DNA	GCAAAGCAAGT-GAAGAACCANGG	GaAAcGCgAtTTGAAGAACCAGGG	1	31358222	-	4	1
DNA	GCAAAGCAAGT-GAAGAACCANGG	aCAAAaCAAGTTGAAcAACtATGG	1	33334171	+	4	1
DNA	GCAAAGCAAGT-GAAGAACCANGG	GCAAttCAAGTTcAAGAAtCATGG	3	11002912	+	4	1
DNA	GCAAAGCAAGT-GAAGAACCANGG	GCAAAGCAAGTGGtAGcAaCtGGG	3	26033427	-	4	1
DNA	GCAAAGCAAGT-GAAGAACCANGG	GtAAAGCAAGTTGAAaAtCaAAGG	3	44644527	-	4	1
DNA	GCAAAGCAAGT-GAAGAACCANGG	GaAAcGCgAtTTGAAGAACCAGGG	3	52051624	+	4	1
DNA	GCAAAGCAAGT-GAAGAACCANGG	GaAAcGCgAtTTGAAGAACCAGGG	3	53568982	+	4	1
DNA	GCAAAGCAAGT-GAAGAACCANGG	GCAAAGCAAGTTcAtGAtCCcAGG	4	44553394	-	4	1
DNA	GCAAAGCAAG-TGAAGAACCANGG	GaAAAGgAAcTTGAAGAAtCAAGG	scaffold0103	34069	-	4	1
DNA	GCAAAGCAAG-TGAAGAACCANGG	aacAAGCAAGATGAAGAAtCAAGG	scaffold0032	126470	-	4	1
DNA	GCAAAGCAAG-TGAAGAACCANGG	GaAAcGCgAtTTGAAGAACCAGGG	scaffold0002	462214	+	4	1
DNA	GCAAAGCAAG-TGAAGAACCANGG	caAAAGCAAGCaGAAGAAtCAAGG	6	29566840	+	4	1
DNA	GCAAAGCAAG-TGAAGAACCANGG	caAAAGCAAGCaGAAGAAtCAAGG	6	29582247	+	4	1
DNA	GCAAAGCAAG-TGAAGAACCANGG	aCAAAGCAgGAaGAAGAACaAGGG	5	33976018	-	4	1
DNA	GCAAAGCAAG-TGAAGAACCANGG	GaAAcGCgAtTTGAAGAACCAGGG	5	35900681	-	4	1
DNA	GCAAAGCAAG-TGAAGAACCANGG	GtAAAGaAAaGTaAAGAACCATGG	8	40036202	+	4	1
DNA	GCAAAGCAAG-TGAAGAACCANGG	tgAcAGCAAGGTGcAGAACCAGGG	8	41754015	-	4	1
DNA	GCAAAGCAAG-TGAAGAACCANGG	GCAAAGaAAtTTGAAGAcCCgGGG	2	12107998	-	4	1
DNA	GCAAAGCAAG-TGAAGAACCANGG	GaAAcGCgAtTTGAAGAACCAGGG	2	30194227	+	4	1
DNA	GCAAAGCAAG-TGAAGAACCANGG	GagAAGCAAtTTGAAGAACgATGG	2	39222812	+	4	1
DNA	GCAAAGCAAG-TGAAGAACCANGG	GagAAGCAAtTTGAAGAACgATGG	2	39414873	-	4	1
DNA	GCAAAGCAAG-TGAAGAACCANGG	GaAAAaCgAGATGAAGAACaACGG	2	40927591	-	4	1
DNA	GCAAAGCAAG-TGAAGAACCANGG	GCcAAGCAAGAaGAAGAAttAAGG	2	41247182	+	4	1
DNA	GCAAAGCAAG-TGAAGAACCANGG	agAAAGCAAGATGAAtAACaATGG	7	8266243	+	4	1
DNA	GCAAAGCAAG-TGAAGAACCANGG	GCAAttCAAGTTcAAGAAtCATGG	7	37083062	-	4	1
DNA	GCAAAGCAAG-TGAAGAACCANGG	GCAAAaCAAGGTGAAGAttgATGG	1	11834611	-	4	1
DNA	GCAAAGCAAG-TGAAGAACCANGG	GtAAAaCAAGGTGAAGAACatAGG	1	11847997	-	4	1
DNA	GCAAAGCAAG-TGAAGAACCANGG	GaAAcGCgAtTTGAAGAACCAGGG	1	16994962	-	4	1
DNA	GCAAAGCAAG-TGAAGAACCANGG	aCcAAGCAAGGTGAAGAAttAAGG	1	21489517	+	4	1
DNA	GCAAAGCAAG-TGAAGAACCANGG	GaAAcGCgAtTTGAAGAACCAGGG	1	31358222	-	4	1
DNA	GCAAAGCAAG-TGAAGAACCANGG	aCAAAaCAAGTTGAAcAACtATGG	1	33334171	+	4	1
DNA	GCAAAGCAAG-TGAAGAACCANGG	aCAAAGgAAGCTGAAGAgCtATGG	1	34793963	-	4	1
DNA	GCAAAGCAAG-TGAAGAACCANGG	GCAAttCAAGTTcAAGAAtCATGG	3	11002912	+	4	1
DNA	GCAAAGCAAG-TGAAGAACCANGG	aCcAAGaAAcATGAAGAACCATGG	3	11246549	-	4	1
DNA	GCAAAGCAAG-TGAAGAACCANGG	GCAgAcaAAtCTGAAGAACCATGG	3	35708688	+	4	1
DNA	GCAAAGCAAG-TGAAGAACCANGG	GtAAAGCAAGTTGAAaAtCaAAGG	3	44644527	-	4	1
DNA	GCAAAGCAAG-TGAAGAACCANGG	GggAAGCAAGATaAgGAACCAGGG	3	46891022	+	4	1
DNA	GCAAAGCAAG-TGAAGAACCANGG	GaAAcGCgAtTTGAAGAACCAGGG	3	52051624	+	4	1
DNA	GCAAAGCAAG-TGAAGAACCANGG	GaAAcGCgAtTTGAAGAACCAGGG	3	53568982	+	4	1
DNA	GCAAAGCAAG-TGAAGAACCANGG	GatAAGCAAGATGAAtAACaATGG	4	7043094	-	4	1
DNA	GCAAAGCAAG-TGAAGAACCANGG	GCAAAaCAAtATGAAtAAtCATGG	4	42801904	-	4	1
DNA	GCAAAGCAAG-TGAAGAACCANGG	GCAAAGCAAGTTcAtGAtCCcAGG	4	44553394	-	4	1
DNA	GCAAAGCAA-GTGAAGAACCANGG	GaAAAGgAACtTGAAGAAtCAAGG	scaffold0103	34069	-	4	1
DNA	GCAAAGCAA-GTGAAGAACCANGG	GaAAcGCgATtTGAAGAACCAGGG	scaffold0002	462214	+	4	1
DNA	GCAAAGCAA-GTGAAGAACCANGG	GgAAAGaAAGaTGAAGAtCCATGG	5	3412874	-	4	1
DNA	GCAAAGCAA-GTGAAGAACCANGG	GCAAcGCAtAGTGAAGAAtCtGGG	5	6442851	-	4	1
DNA	GCAAAGCAA-GTGAAGAACCANGG	tCAAAcCAATGaGAAGAAaCATGG	5	20065078	+	4	1
DNA	GCAAAGCAA-GTGAAGAACCANGG	GaAAcGCgATtTGAAGAACCAGGG	5	35900681	-	4	1
DNA	GCAAAGCAA-GTGAAGAACCANGG	tgAcAGCAAGGTGcAGAACCAGGG	8	41754015	-	4	1
DNA	GCAAAGCAA-GTGAAGAACCANGG	GCAAAGaAATtTGAAGAcCCgGGG	2	12107998	-	4	1
DNA	GCAAAGCAA-GTGAAGAACCANGG	GCAAAGaAAAGaGAAGAAatATGG	2	14923029	+	4	1
DNA	GCAAAGCAA-GTGAAGAACCANGG	GCAtAGCAATGcGAAaAAaCATGG	2	24143017	+	4	1
DNA	GCAAAGCAA-GTGAAGAACCANGG	GCAtAGCAATGcGAAaAAaCATGG	2	24149998	+	4	1
DNA	GCAAAGCAA-GTGAAGAACCANGG	GaAAcGCgATtTGAAGAACCAGGG	2	30194227	+	4	1
DNA	GCAAAGCAA-GTGAAGAACCANGG	GagAAGCAATtTGAAGAACgATGG	2	39222812	+	4	1
DNA	GCAAAGCAA-GTGAAGAACCANGG	GagAAGCAATtTGAAGAACgATGG	2	39414873	-	4	1
DNA	GCAAAGCAA-GTGAAGAACCANGG	aaAAAGCAACGTGcAGgACCATGG	2	43881303	+	4	1
DNA	GCAAAGCAA-GTGAAGAACCANGG	GCAgAGCAAAGaGgAGAAaCATGG	7	950940	-	4	1
DNA	GCAAAGCAA-GTGAAGAACCANGG	GtAAAaCAAGGTGAAGAACatAGG	1	11847997	-	4	1
DNA	GCAAAGCAA-GTGAAGAACCANGG	GCAAAaCAAGGTGAAGAttgATGG	1	11834611	-	4	1
DNA	GCAAAGCAA-GTGAAGAACCANGG	GaAAcGCgATtTGAAGAACCAGGG	1	16994962	-	4	1
DNA	GCAAAGCAA-GTGAAGAACCANGG	aCcAAGCAAGGTGAAGAAttAAGG	1	21489517	+	4	1
DNA	GCAAAGCAA-GTGAAGAACCANGG	GaAAcGCgATtTGAAGAACCAGGG	1	31358222	-	4	1
DNA	GCAAAGCAA-GTGAAGAACCANGG	aCcAAGaAACaTGAAGAACCATGG	3	11246549	-	4	1
DNA	GCAAAGCAA-GTGAAGAACCANGG	GCAgAtCAtTGTGAgGAACCAGGG	3	30884070	+	4	1
DNA	GCAAAGCAA-GTGAAGAACCANGG	GCAgAcaAATcTGAAGAACCATGG	3	35708688	+	4	1
DNA	GCAAAGCAA-GTGAAGAACCANGG	GCAAAtCAATGTcAAaAACCcTGG	3	39698842	-	4	1
DNA	GCAAAGCAA-GTGAAGAACCANGG	GaAAcGCgATtTGAAGAACCAGGG	3	52051624	+	4	1
DNA	GCAAAGCAA-GTGAAGAACCANGG	GaAAcGCgATtTGAAGAACCAGGG	3	53568982	+	4	1
DNA	GCAAAGCAA-GTGAAGAACCANGG	GCAAAaCAATaTGAAtAAtCATGG	4	42801904	-	4	1
DNA	GCAAAGCA-AGTGAAGAACCANGG	GCcAAGCAAtaTGAAGAAtCAAGG	scaffold0111	42913	+	4	1
DNA	GCAAAGCA-AGTGAAGAACCANGG	GCAgAGaAGAGTcAAtAACCATGG	scaffold0101	14389	+	4	1
DNA	GCAAAGCA-AGTGAAGAACCANGG	GaAAgcaATAGTGAAGAACCATGG	scaffold0035	52475	-	4	1
DNA	GCAAAGCA-AGTGAAGAACCANGG	GCAAgGaAGAGaGAAGAAtCAAGG	6	6971261	+	4	1
DNA	GCAAAGCA-AGTGAAGAACCANGG	GaAAAGaACAtTGAAGAAaCAAGG	2	13795096	+	4	1
DNA	GCAAAGCA-AGTGAAGAACCANGG	GCAAAGaAAAGaGAAGAAatATGG	2	14923029	+	4	1
DNA	GCAAAGCA-AGTGAAGAACCANGG	GCgAAGCAAttTGAAGAACgATGG	2	39473500	-	4	1
DNA	GCAAAGCA-AGTGAAGAACCANGG	GCAgAGCAAAGaGgAGAAaCATGG	7	950940	-	4	1
DNA	GCAAAGCA-AGTGAAGAACCANGG	GCAAgcaATAGTcAAGAACCATGG	7	14223548	-	4	1
DNA	GCAAAGCA-AGTGAAGAACCANGG	GCcAAGCgGAGTGAtGgACCAAGG	3	16891997	-	4	1
DNA	GCAAAGCA-AGTGAAGAACCANGG	GCAgAtCATtGTGAgGAACCAGGG	3	30884070	+	4	1
DNA	GCAAAGCA-AGTGAAGAACCANGG	GCAAtGtAGAGTGgAaAACCACGG	3	47199543	+	4	1
DNA	GCAAAGC-AAGTGAAGAACCANGG	GCAAAGCCAAGgGAgGcACCcCGG	scaffold0806	3190	-	4	1
DNA	GCAAAGC-AAGTGAAGAACCANGG	aCcAAGaGAAGaGAAGAACCAAGG	scaffold0220	20031	-	4	1
DNA	GCAAAGC-AAGTGAAGAACCANGG	GCcAAGCAAtaTGAAGAAtCAAGG	scaffold0111	42913	+	4	1
DNA	GCAAAGC-AAGTGAAGAACCANGG	GaAAcGCGAttTGAAGAACCAGGG	scaffold0002	462214	+	4	1
DNA	GCAAAGC-AAGTGAAGAACCANGG	GCAAcGCAtAGTGAAGAAtCtGGG	5	6442851	-	4	1
DNA	GCAAAGC-AAGTGAAGAACCANGG	GCAAAtCGAAGcaAAGAAgCAAGG	5	9816191	+	4	1
DNA	GCAAAGC-AAGTGAAGAACCANGG	aCAAAGaTAAGTtAAGAAaCATGG	5	29144803	+	4	1
DNA	GCAAAGC-AAGTGAAGAACCANGG	GaAAcGCGAttTGAAGAACCAGGG	5	35900681	-	4	1
DNA	GCAAAGC-AAGTGAAGAACCANGG	GCAgAGCCAAtTGAAGAAtgAAGG	5	36575515	+	4	1
DNA	GCAAAGC-AAGTGAAGAACCANGG	GCAAtGCTAAaTcAAGAACtAAGG	8	8478040	+	4	1
DNA	GCAAAGC-AAGTGAAGAACCANGG	aCcAAGaGAAGaGAAGAACCAAGG	8	22254843	-	4	1
DNA	GCAAAGC-AAGTGAAGAACCANGG	aCAAAGCGAAGTGtAaAACaAGGG	8	34410203	-	4	1
DNA	GCAAAGC-AAGTGAAGAACCANGG	GCAgAGCCAAtTGAAGAAtgAAGG	2	1045710	+	4	1
DNA	GCAAAGC-AAGTGAAGAACCANGG	tCAAAGCTAAGaGAAGtAgCAAGG	2	10188270	+	4	1
DNA	GCAAAGC-AAGTGAAGAACCANGG	GCtAAGCTAAGTagAGAACaACGG	2	11298044	-	4	1
DNA	GCAAAGC-AAGTGAAGAACCANGG	GCAAAGaAAAGaGAAGAAatATGG	2	14923029	+	4	1
DNA	GCAAAGC-AAGTGAAGAACCANGG	aCcAAGaGAAGaGAAGAACCAAGG	2	19358968	-	4	1
DNA	GCAAAGC-AAGTGAAGAACCANGG	GaAAcGCGAttTGAAGAACCAGGG	2	30194227	+	4	1
DNA	GCAAAGC-AAGTGAAGAACCANGG	GCgAAGCAAttTGAAGAACgATGG	2	39473500	-	4	1
DNA	GCAAAGC-AAGTGAAGAACCANGG	GCAgAGCAAAGaGgAGAAaCATGG	7	950940	-	4	1
DNA	GCAAAGC-AAGTGAAGAACCANGG	aCcAAGaGAAGaGAAGAACCAAGG	7	8756101	+	4	1
DNA	GCAAAGC-AAGTGAAGAACCANGG	GCcAAGtTAAaTGAAGAACaAAGG	7	32931251	-	4	1
DNA	GCAAAGC-AAGTGAAGAACCANGG	tgAAgGtGAAGTGAAGAACCATGG	7	34349242	+	4	1
DNA	GCAAAGC-AAGTGAAGAACCANGG	GaAAAGCTAAGcGAAGAAagAGGG	7	35287157	-	4	1
DNA	GCAAAGC-AAGTGAAGAACCANGG	GCAAAGCGAAGTtcAaAAgCATGG	1	2850744	+	4	1
DNA	GCAAAGC-AAGTGAAGAACCANGG	tCAAAtCCAAGTGcAGcACCAGGG	1	5655196	+	4	1
DNA	GCAAAGC-AAGTGAAGAACCANGG	GaAAcGCGAttTGAAGAACCAGGG	1	16994962	-	4	1
DNA	GCAAAGC-AAGTGAAGAACCANGG	GaAAcGCGAttTGAAGAACCAGGG	1	31358222	-	4	1
DNA	GCAAAGC-AAGTGAAGAACCANGG	GgAgAGCCAAGaGAAGAAgCAGGG	1	36516162	+	4	1
DNA	GCAAAGC-AAGTGAAGAACCANGG	aCcAAGaGAAGaGAAGAACCAAGG	1	51477070	-	4	1
DNA	GCAAAGC-AAGTGAAGAACCANGG	aCcAAGaGAAGaGAAGAACCAAGG	3	11885507	+	4	1
DNA	GCAAAGC-AAGTGAAGAACCANGG	GCcAAGCGgAGTGAtGgACCAAGG	3	16891997	-	4	1
DNA	GCAAAGC-AAGTGAAGAACCANGG	aCcAAGaGAAGaGAAGAACCAAGG	3	18366465	+	4	1
DNA	GCAAAGC-AAGTGAAGAACCANGG	aCcAAGaTAAGaGAAGAACCAAGG	3	40957306	-	4	1
DNA	GCAAAGC-AAGTGAAGAACCANGG	GaAAcGCGAttTGAAGAACCAGGG	3	52051624	+	4	1
DNA	GCAAAGC-AAGTGAAGAACCANGG	GaAAcGCGAttTGAAGAACCAGGG	3	53568982	+	4	1
DNA	GCAAAGC-AAGTGAAGAACCANGG	GCcAAcCTAAtTGAAGAACaAGGG	3	54158638	+	4	1
DNA	GCAAAGC-AAGTGAAGAACCANGG	aCcAAGaGAAGaGAAGAACCAAGG	4	21062718	-	4	1
DNA	GCAAAGC-AAGTGAAGAACCANGG	aCAAAaCGAAaTGAAGAtCCACGG	4	31243224	-	4	1
DNA	GCAAAG-CAAGTGAAGAACCANGG	GaAAAcGCAAGTcAAGAAtCATGG	scaffold1799	471	-	4	1
DNA	GCAAAG-CAAGTGAAGAACCANGG	GCAAAGCCAAGgGAgGcACCcCGG	scaffold0806	3190	-	4	1
DNA	GCAAAG-CAAGTGAAGAACCANGG	aCcAAGAgAAGaGAAGAACCAAGG	scaffold0220	20031	-	4	1
DNA	GCAAAG-CAAGTGAAGAACCANGG	tCAAAaACAAGTttAGAACCATGG	6	24290484	+	4	1
DNA	GCAAAG-CAAGTGAAGAACCANGG	agAAAaACAAGTGAAaAACCAGGG	5	8376214	-	4	1
DNA	GCAAAG-CAAGTGAAGAACCANGG	aCAAAGAtAAGTtAAGAAaCATGG	5	29144803	+	4	1
DNA	GCAAAG-CAAGTGAAGAACCANGG	GCAgAGCCAAtTGAAGAAtgAAGG	5	36575515	+	4	1
DNA	GCAAAG-CAAGTGAAGAACCANGG	aCcAAGAgAAGaGAAGAACCAAGG	8	22254843	-	4	1
DNA	GCAAAG-CAAGTGAAGAACCANGG	GCAgAGTCAAGcGtgGAACCACGG	8	24538311	+	4	1
DNA	GCAAAG-CAAGTGAAGAACCANGG	GCAAAtGCAAGTGAcaAAtCAAGG	8	25931298	+	4	1
DNA	GCAAAG-CAAGTGAAGAACCANGG	GCAgAGCCAAtTGAAGAAtgAAGG	2	1045710	+	4	1
DNA	GCAAAG-CAAGTGAAGAACCANGG	GCAAAGAaAAGaGAAGAAatATGG	2	14923029	+	4	1
DNA	GCAAAG-CAAGTGAAGAACCANGG	aCcAAGAgAAGaGAAGAACCAAGG	2	19358968	-	4	1
DNA	GCAAAG-CAAGTGAAGAACCANGG	aaAAAcACAAGTGAAGgACCATGG	7	7282145	-	4	1
DNA	GCAAAG-CAAGTGAAGAACCANGG	aCcAAGAgAAGaGAAGAACCAAGG	7	8756101	+	4	1
DNA	GCAAAG-CAAGTGAAGAACCANGG	agcAAaGCAAGTGAAGAACCAGGG	7	19506361	+	4	1
DNA	GCAAAG-CAAGTGAAGAACCANGG	GCcAAGTtAAaTGAAGAACaAAGG	7	32931251	-	4	1
DNA	GCAAAG-CAAGTGAAGAACCANGG	tgAAgGTgAAGTGAAGAACCATGG	7	34349242	+	4	1
DNA	GCAAAG-CAAGTGAAGAACCANGG	tCAAAtCCAAGTGcAGcACCAGGG	1	5655196	+	4	1
DNA	GCAAAG-CAAGTGAAGAACCANGG	GgAgAGCCAAGaGAAGAAgCAGGG	1	36516162	+	4	1
DNA	GCAAAG-CAAGTGAAGAACCANGG	GCcAAGACAccgGAAGAACCAAGG	1	46405886	+	4	1
DNA	GCAAAG-CAAGTGAAGAACCANGG	aCcAAGAgAAGaGAAGAACCAAGG	1	51477070	-	4	1
DNA	GCAAAG-CAAGTGAAGAACCANGG	GgAAAGGCAAtTGAAaAACaATGG	3	5369697	-	4	1
DNA	GCAAAG-CAAGTGAAGAACCANGG	aCcAAGAgAAGaGAAGAACCAAGG	3	11885507	+	4	1
DNA	GCAAAG-CAAGTGAAGAACCANGG	GaAAAcACAAGTcAAGAAtCATGG	3	12162425	-	4	1
DNA	GCAAAG-CAAGTGAAGAACCANGG	aCcAAGAgAAGaGAAGAACCAAGG	3	18366465	+	4	1
DNA	GCAAAG-CAAGTGAAGAACCANGG	aCcAAGAtAAGaGAAGAACCAAGG	3	40957306	-	4	1
DNA	GCAAAG-CAAGTGAAGAACCANGG	GgAAAGTCtgGTaAAGAACCATGG	4	5352978	-	4	1
DNA	GCAAAG-CAAGTGAAGAACCANGG	aCcAAGAgAAGaGAAGAACCAAGG	4	21062718	-	4	1
DNA	GCAAA-GCAAGTGAAGAACCANGG	GaAAACGCAAGccAAGAAtCATGG	scaffold0613	8423	-	4	1
DNA	GCAAA-GCAAGTGAAGAACCANGG	GaAAACGCAAGccAAGAAtCATGG	scaffold0174	17260	+	4	1
DNA	GCAAA-GCAAGTGAAGAACCANGG	GaAAACGCAAGccAAGAAtCATGG	scaffold0126	14828	-	4	1
DNA	GCAAA-GCAAGTGAAGAACCANGG	GaAAACGCAAGccAAGAAtCATGG	scaffold0080	51089	-	4	1
DNA	GCAAA-GCAAGTGAAGAACCANGG	GaAAACGCAAGccAAGAAtCATGG	scaffold0075	33152	-	4	1
DNA	GCAAA-GCAAGTGAAGAACCANGG	GaAAACGCAAGccAAGAAtCATGG	scaffold0075	36732	-	4	1
DNA	GCAAA-GCAAGTGAAGAACCANGG	GaAAACGCAAGccAAGAAtCATGG	scaffold0022	17241	+	4	1
DNA	GCAAA-GCAAGTGAAGAACCANGG	GCtAAAGCAtcTGAAGAACtATGG	scaffold0010	108273	-	4	1
DNA	GCAAA-GCAAGTGAAGAACCANGG	GCAtATGtgAGTGAgGAACCACGG	6	8258376	-	4	1
DNA	GCAAA-GCAAGTGAAGAACCANGG	GaAAACGCAAGccAAGAAtCATGG	6	8726323	-	4	1
DNA	GCAAA-GCAAGTGAAGAACCANGG	GaAAACGCAAGccAAGAAtCATGG	6	16152110	-	4	1
DNA	GCAAA-GCAAGTGAAGAACCANGG	GaAAACGCAAGccAAGAAtCATGG	6	20095538	-	4	1
DNA	GCAAA-GCAAGTGAAGAACCANGG	tCAAAAaCAAGTttAGAACCATGG	6	24290484	+	4	1
DNA	GCAAA-GCAAGTGAAGAACCANGG	agAAAAaCAAGTGAAaAACCAGGG	5	8376214	-	4	1
DNA	GCAAA-GCAAGTGAAGAACCANGG	GaAAACGCAAGccAAGAAtCATGG	5	15733401	+	4	1
DNA	GCAAA-GCAAGTGAAGAACCANGG	GaAAACGCAAGccAAGAAtCATGG	5	20620030	+	4	1
DNA	GCAAA-GCAAGTGAAGAACCANGG	GaAAACGCAAGccAAGAAtCATGG	5	21241246	-	4	1
DNA	GCAAA-GCAAGTGAAGAACCANGG	ctAAATGCAAtTGAAGAAtCAAGG	5	40597584	-	4	1
DNA	GCAAA-GCAAGTGAAGAACCANGG	GCcAAAGCAgGaGtAGAACCACGG	5	42720512	-	4	1
DNA	GCAAA-GCAAGTGAAGAACCANGG	GCAAATGCAAGTatcaAACCATGG	8	253718	-	4	1
DNA	GCAAA-GCAAGTGAAGAACCANGG	GCAAATGCAAGTatcaAACCATGG	8	662115	+	4	1
DNA	GCAAA-GCAAGTGAAGAACCANGG	GCAAATGCAAGTatcaAACCATGG	8	847913	+	4	1
DNA	GCAAA-GCAAGTGAAGAACCANGG	GaAAACGCAAGccAAGAAtCATGG	8	6767121	+	4	1
DNA	GCAAA-GCAAGTGAAGAACCANGG	GaAAACGCAAGccAAGAAtCATGG	8	17131666	+	4	1
DNA	GCAAA-GCAAGTGAAGAACCANGG	GtAAATGCAAGTaAAtAACaATGG	8	24542330	-	4	1
DNA	GCAAA-GCAAGTGAAGAACCANGG	GtAAAGaaAAGTaAAGAACCATGG	8	40036202	+	4	1
DNA	GCAAA-GCAAGTGAAGAACCANGG	GaAAACGCAAGccAAGAAtCATGG	2	13924	-	4	1
DNA	GCAAA-GCAAGTGAAGAACCANGG	GCcAAAGCtAGTGcAGcACCAAGG	2	6552267	-	4	1
DNA	GCAAA-GCAAGTGAAGAACCANGG	GaAAACGCAAGccAAGAAtCATGG	2	22046982	-	4	1
DNA	GCAAA-GCAAGTGAAGAACCANGG	GaAAACGCAAGctAAGAAtCATGG	2	23161736	-	4	1
DNA	GCAAA-GCAAGTGAAGAACCANGG	GaAAACGCAAGctAAGAAtCATGG	2	23572993	-	4	1
DNA	GCAAA-GCAAGTGAAGAACCANGG	GaAAACGCAAGccAAGAAtCATGG	2	25355379	+	4	1
DNA	GCAAA-GCAAGTGAAGAACCANGG	GaAAACGCAAGctAAGAAtCATGG	2	27629335	+	4	1
DNA	GCAAA-GCAAGTGAAGAACCANGG	GaAAATGCAAGTGAAGAAaagAGG	2	28438234	+	4	1
DNA	GCAAA-GCAAGTGAAGAACCANGG	GaAAACGCAAGccAAGAAtCATGG	7	11429	-	4	1
DNA	GCAAA-GCAAGTGAAGAACCANGG	aaAAACaCAAGTGAAGgACCATGG	7	7282145	-	4	1
DNA	GCAAA-GCAAGTGAAGAACCANGG	GaAAACGCAAGccAAGAAtCATGG	7	8715731	+	4	1
DNA	GCAAA-GCAAGTGAAGAACCANGG	GaAAACGCAAGccAAGAAtCATGG	7	13655800	+	4	1
DNA	GCAAA-GCAAGTGAAGAACCANGG	GaAAACGCAAGccAAGAAtCATGG	7	14548954	+	4	1
DNA	GCAAA-GCAAGTGAAGAACCANGG	GaAAACGCAAGccAAGAAtCATGG	7	14146593	-	4	1
DNA	GCAAA-GCAAGTGAAGAACCANGG	GaAAACGCAAGccAAGAAtCATGG	7	18285492	+	4	1
DNA	GCAAA-GCAAGTGAAGAACCANGG	tCAAATcCAAGTGcAGcACCAGGG	1	5655196	+	4	1
DNA	GCAAA-GCAAGTGAAGAACCANGG	GtcAATGaAAGaGAAGAACCAAGG	1	13074669	-	4	1
DNA	GCAAA-GCAAGTGAAGAACCANGG	GaAAACGCAAGccAAGAAtCATGG	1	20235375	+	4	1
DNA	GCAAA-GCAAGTGAAGAACCANGG	GaAgAAGaAAGaGAAGAACCAGGG	1	21080007	+	4	1
DNA	GCAAA-GCAAGTGAAGAACCANGG	GaAAACGCAAGctAAGAAtCATGG	3	892262	+	4	1
DNA	GCAAA-GCAAGTGAAGAACCANGG	GgAAAGGCAAtTGAAaAACaATGG	3	5369697	-	4	1
DNA	GCAAA-GCAAGTGAAGAACCANGG	GaAAACGCAAGccAAGAAtCATGG	3	12382473	+	4	1
DNA	GCAAA-GCAAGTGAAGAACCANGG	GaAAACaCAAGTcAAGAAtCATGG	3	12162425	-	4	1
DNA	GCAAA-GCAAGTGAAGAACCANGG	GaAAACGCAAGccAAGAAtCATGG	3	13197751	-	4	1
DNA	GCAAA-GCAAGTGAAGAACCANGG	GaAAACGCAAGccAAGAAtCATGG	3	15631278	-	4	1
DNA	GCAAA-GCAAGTGAAGAACCANGG	GCAAATGgAAGaaAAGAAgCATGG	3	26654299	+	4	1
DNA	GCAAA-GCAAGTGAAGAACCANGG	GgAAAAGaAAagGAAGAACCAGGG	3	40990559	-	4	1
DNA	GCAAA-GCAAGTGAAGAACCANGG	GaAAACGCAAGccAAGAAtCATGG	4	3881	-	4	1
DNA	GCAAA-GCAAGTGAAGAACCANGG	GaAAACGCAAGccAAGAAtCATGG	4	15252212	+	4	1
DNA	GCAAA-GCAAGTGAAGAACCANGG	GaAAgCGCAAGTcAAGAAtCATGG	4	15262420	-	4	1
DNA	GCAA-AGCAAGTGAAGAACCANGG	GaAAAcGCAAGTcAAGAAtCATGG	scaffold1799	471	-	4	1
DNA	GCAA-AGCAAGTGAAGAACCANGG	GCtAAAGCAtcTGAAGAACtATGG	scaffold0010	108273	-	4	1
DNA	GCAA-AGCAAGTGAAGAACCANGG	tCAAAAaCAAGTttAGAACCATGG	6	24290484	+	4	1
DNA	GCAA-AGCAAGTGAAGAACCANGG	agAAAAaCAAGTGAAaAACCAGGG	5	8376214	-	4	1
DNA	GCAA-AGCAAGTGAAGAACCANGG	tCAAGAGatAGTGAAGAACaATGG	5	16376092	+	4	1
DNA	GCAA-AGCAAGTGAAGAACCANGG	GagACAtCAAGTGAAGAAtCAAGG	5	19763833	-	4	1
DNA	GCAA-AGCAAGTGAAGAACCANGG	GCcAAAGCAgGaGtAGAACCACGG	5	42720512	-	4	1
DNA	GCAA-AGCAAGTGAAGAACCANGG	GCAACAaaAAGTGcAaAACCATGG	8	4190226	+	4	1
DNA	GCAA-AGCAAGTGAAGAACCANGG	GCAAAtGCAAGTGAcaAAtCAAGG	8	25931298	+	4	1
DNA	GCAA-AGCAAGTGAAGAACCANGG	GCAATAGCAAGTGcAGcAatATGG	2	607856	-	4	1
DNA	GCAA-AGCAAGTGAAGAACCANGG	GCcAAAGCtAGTGcAGcACCAAGG	2	6552267	-	4	1
DNA	GCAA-AGCAAGTGAAGAACCANGG	GgAgGAGCAAaTGAAGAACtAAGG	7	3269472	-	4	1
DNA	GCAA-AGCAAGTGAAGAACCANGG	GggATAGCAAGaGAtGAACCACGG	7	39222542	+	4	1
DNA	GCAA-AGCAAGTGAAGAACCANGG	GCAAGAGCAAGaGAAaAtCCtTGG	1	1382877	+	4	1
DNA	GCAA-AGCAAGTGAAGAACCANGG	GaAgAAGaAAGaGAAGAACCAGGG	1	21080007	+	4	1
DNA	GCAA-AGCAAGTGAAGAACCANGG	GCAACAtCAAGTGAAGgAgaAGGG	3	35613649	+	4	1
DNA	GCAA-AGCAAGTGAAGAACCANGG	GgAAAAGaAAagGAAGAACCAGGG	3	40990559	-	4	1
DNA	GCAA-AGCAAGTGAAGAACCANGG	GaAAGcGCAAGTcAAGAAtCATGG	4	15262420	-	4	1
DNA	GCAA-AGCAAGTGAAGAACCANGG	GCAAGAGaAAGaGAAGAtgCAAGG	4	56422736	-	4	1
DNA	GCA-AAGCAAGTGAAGAACCANGG	GaAAAcGCAAGTcAAGAAtCATGG	scaffold1799	471	-	4	1
DNA	GCA-AAGCAAGTGAAGAACCANGG	GCtGAAGCAtcTGAAGAACCgTGG	scaffold0207	23817	-	4	1
DNA	GCA-AAGCAAGTGAAGAACCANGG	GCtAAAGCAtcTGAAGAACtATGG	scaffold0010	108273	-	4	1
DNA	GCA-AAGCAAGTGAAGAACCANGG	GCATAtGtgAGTGAgGAACCACGG	6	8258376	-	4	1
DNA	GCA-AAGCAAGTGAAGAACCANGG	tCAAAAaCAAGTttAGAACCATGG	6	24290484	+	4	1
DNA	GCA-AAGCAAGTGAAGAACCANGG	agAAAAaCAAGTGAAaAACCAGGG	5	8376214	-	4	1
DNA	GCA-AAGCAAGTGAAGAACCANGG	GgACAAaCAAaTaAAGAACCAAGG	5	42355363	-	4	1
DNA	GCA-AAGCAAGTGAAGAACCANGG	GCcAAAGCAgGaGtAGAACCACGG	5	42720512	-	4	1
DNA	GCA-AAGCAAGTGAAGAACCANGG	GtAGAAGCAAaTGtAGAAaCATGG	8	6600030	+	4	1
DNA	GCA-AAGCAAGTGAAGAACCANGG	GtAGAAGCAAaTGtAGAAaCATGG	8	6675483	+	4	1
DNA	GCA-AAGCAAGTGAAGAACCANGG	GCAAAtGCAAGTGAcaAAtCAAGG	8	25931298	+	4	1
DNA	GCA-AAGCAAGTGAAGAACCANGG	GCAGAAGCAAaTGcAGAACttCGG	8	31704811	-	4	1
DNA	GCA-AAGCAAGTGAAGAACCANGG	GCcAAAGCtAGTGcAGcACCAAGG	2	6552267	-	4	1
DNA	GCA-AAGCAAGTGAAGAACCANGG	GCAGAAGaAAGTGgtGAACaATGG	2	25773597	-	4	1
DNA	GCA-AAGCAAGTGAAGAACCANGG	GCACAAtCAAcTGAAGgACgAAGG	2	42429051	-	4	1
DNA	GCA-AAGCAAGTGAAGAACCANGG	GgAGgAGCAAaTGAAGAACtAAGG	7	3269472	-	4	1
DNA	GCA-AAGCAAGTGAAGAACCANGG	GCtGAAGaAAcTGAAGAAaCAAGG	1	11218703	-	4	1
DNA	GCA-AAGCAAGTGAAGAACCANGG	GCACAAGCcAGTGAtGAtaCAGGG	1	47341624	-	4	1
DNA	GCA-AAGCAAGTGAAGAACCANGG	GCATAAcCAAGTaAccAACCAAGG	3	21265527	-	4	1
DNA	GCA-AAGCAAGTGAAGAACCANGG	GgAAAAGaAAagGAAGAACCAGGG	3	40990559	-	4	1
DNA	GCA-AAGCAAGTGAAGAACCANGG	GaATAAGaAAGTGAAaAACtATGG	4	1736961	-	4	1
DNA	GC-AAAGCAAGTGAAGAACCANGG	GaAAAcGCAAGTcAAGAAtCATGG	scaffold1799	471	-	4	1
DNA	GC-AAAGCAAGTGAAGAACCANGG	GCTgAAGCAtcTGAAGAACCgTGG	scaffold0207	23817	-	4	1
DNA	GC-AAAGCAAGTGAAGAACCANGG	tCAAAAaCAAGTttAGAACCATGG	6	24290484	+	4	1
DNA	GC-AAAGCAAGTGAAGAACCANGG	GCTAAAaCAAcaGcAGAACCATGG	5	6316455	+	4	1
DNA	GC-AAAGCAAGTGAAGAACCANGG	agAAAAaCAAGTGAAaAACCAGGG	5	8376214	-	4	1
DNA	GC-AAAGCAAGTGAAGAACCANGG	GCCAAAtaAAaTGAAGAACaAGGG	5	11735854	-	4	1
DNA	GC-AAAGCAAGTGAAGAACCANGG	GaGAcAtCAAGTGAAGAAtCAAGG	5	19763833	-	4	1
DNA	GC-AAAGCAAGTGAAGAACCANGG	GCAAAtGCAAGTGAcaAAtCAAGG	8	25931298	+	4	1
DNA	GC-AAAGCAAGTGAAGAACCANGG	aCTAAAaCAAGTcAAGAACCtTGG	8	27072187	+	4	1
DNA	GC-AAAGCAAGTGAAGAACCANGG	GCTAAAcCAAGTaActAACCATGG	8	38221411	-	4	1
DNA	GC-AAAGCAAGTGAAGAACCANGG	GaTAAAaCAAGgGAAGAtCCAGGG	2	3146179	-	4	1
DNA	GC-AAAGCAAGTGAAGAACCANGG	GCCAAAtCAAaTGAAGAAtaAGGG	2	19183576	+	4	1
DNA	GC-AAAGCAAGTGAAGAACCANGG	GCGAAAaCAAGTGAAcAAatAAGG	2	41511164	+	4	1
DNA	GC-AAAGCAAGTGAAGAACCANGG	GCTAAAGCAtcTGAAGAACtgTGG	7	13181627	+	4	1
DNA	GC-AAAGCAAGTGAAGAACCANGG	GgGAtAGCAAGaGAtGAACCACGG	7	39222542	+	4	1
DNA	GC-AAAGCAAGTGAAGAACCANGG	GCTgAAGaAAcTGAAGAAaCAAGG	1	11218703	-	4	1
DNA	GC-AAAGCAAGTGAAGAACCANGG	GtCAAtGaAAGaGAAGAACCAAGG	1	13074669	-	4	1
DNA	GC-AAAGCAAGTGAAGAACCANGG	GaAgAAGaAAGaGAAGAACCAGGG	1	21080007	+	4	1
DNA	GC-AAAGCAAGTGAAGAACCANGG	GCTAAAGCAtcTGAAGAACtgTGG	1	22646113	-	4	1
DNA	GC-AAAGCAAGTGAAGAACCANGG	tgCAAAGCtAGTGAAGAACCtGGG	3	6026742	+	4	1
DNA	GC-AAAGCAAGTGAAGAACCANGG	GCTAAAGCAtcTGAAGAACtgTGG	3	13134680	-	4	1
DNA	GC-AAAGCAAGTGAAGAACCANGG	GaGAAAcCAcGTGAAGAAtCAAGG	3	21653493	+	4	1
DNA	GC-AAAGCAAGTGAAGAACCANGG	GgAAAAGaAAagGAAGAACCAGGG	3	40990559	-	4	1
DNA	GC-AAAGCAAGTGAAGAACCANGG	aCCAAAtCAAaTGAAGAACaAGGG	4	49806928	+	4	1
DNA	G-CAAAGCAAGTGAAGAACCANGG	GAaAAcGCAAGTcAAGAAtCATGG	scaffold1799	471	-	4	1
DNA	G-CAAAGCAAGTGAAGAACCANGG	tGCAtAGgAAtTGAAGAACCAGGG	scaffold0032	70627	+	4	1
DNA	G-CAAAGCAAGTGAAGAACCANGG	GCtAAAGCAtcTGAAGAACtATGG	scaffold0010	108273	-	4	1
DNA	G-CAAAGCAAGTGAAGAACCANGG	GACtAAcaAAGTGAAcAACCAAGG	scaffold0005	29452	+	4	1
DNA	G-CAAAGCAAGTGAAGAACCANGG	GACtAAaaAAGTGAAcAACCAAGG	scaffold0002	349202	+	4	1
DNA	G-CAAAGCAAGTGAAGAACCANGG	cTCAcAGCAAGTGtAaAACCATGG	6	164208	-	4	1
DNA	G-CAAAGCAAGTGAAGAACCANGG	GACAAgGCAAtTGAAagACCAGGG	6	24271841	-	4	1
DNA	G-CAAAGCAAGTGAAGAACCANGG	aGaAAAaCAAGTGAAaAACCAGGG	5	8376214	-	4	1
DNA	G-CAAAGCAAGTGAAGAACCANGG	GCCAAAtaAAaTGAAGAACaAGGG	5	11735854	-	4	1
DNA	G-CAAAGCAAGTGAAGAACCANGG	GAgAcAtCAAGTGAAGAAtCAAGG	5	19763833	-	4	1
DNA	G-CAAAGCAAGTGAAGAACCANGG	GTCAAAGCAAtTGAgGcAtCAAGG	5	40283592	+	4	1
DNA	G-CAAAGCAAGTGAAGAACCANGG	cTCAAAGCAAtTGAAaAAtCAAGG	5	40362451	+	4	1
DNA	G-CAAAGCAAGTGAAGAACCANGG	cTCAAAGCAAtTGAAaAAtCAAGG	5	40409193	+	4	1
DNA	G-CAAAGCAAGTGAAGAACCANGG	tTCAAAaCAcGTGAAtAACCACGG	8	1802410	+	4	1
DNA	G-CAAAGCAAGTGAAGAACCANGG	GTCAAAGtAAGTGAAGgttCATGG	8	31017859	+	4	1
DNA	G-CAAAGCAAGTGAAGAACCANGG	GTCAAAcCAAcTGAAGcAtCACGG	8	44418222	-	4	1
DNA	G-CAAAGCAAGTGAAGAACCANGG	GAtAAAaCAAGgGAAGAtCCAGGG	2	3146179	-	4	1
DNA	G-CAAAGCAAGTGAAGAACCANGG	GCCAAAtCAAaTGAAGAAtaAGGG	2	19183576	+	4	1
DNA	G-CAAAGCAAGTGAAGAACCANGG	GGgAtAGCAAGaGAtGAACCACGG	7	39222542	+	4	1
DNA	G-CAAAGCAAGTGAAGAACCANGG	GTCAAAaCAAtTGAAaAgCCATGG	1	4689235	+	4	1
DNA	G-CAAAGCAAGTGAAGAACCANGG	cACAAtGCAAGTGttGAACCATGG	1	15447030	+	4	1
DNA	G-CAAAGCAAGTGAAGAACCANGG	GAagAAGaAAGaGAAGAACCAGGG	1	21080007	+	4	1
DNA	G-CAAAGCAAGTGAAGAACCANGG	GACAAgGCAAGTaAAtAACaACGG	1	25956905	-	4	1
DNA	G-CAAAGCAAGTGAAGAACCANGG	GAgAAAcCAcGTGAAGAAtCAAGG	3	21653493	+	4	1
DNA	G-CAAAGCAAGTGAAGAACCANGG	GGaAAAGaAAagGAAGAACCAGGG	3	40990559	-	4	1
DNA	G-CAAAGCAAGTGAAGAACCANGG	GACtAAcaAAGTGAAcAACCAAGG	4	14810251	-	4	1
DNA	G-CAAAGCAAGTGAAGAACCANGG	cTCAcAGCAAGTGtAaAACCATGG	4	18208176	+	4	1
DNA	G-CAAAGCAAGTGAAGAACCANGG	GGCAAtGCAAGaGAtGAgCCATGG	4	20724820	+	4	1
DNA	G-CAAAGCAAGTGAAGAACCANGG	GGCAgAtCAAGTGAAGAtaCATGG	4	22039554	+	4	1
DNA	G-CAAAGCAAGTGAAGAACCANGG	aCCAAAtCAAaTGAAGAACaAGGG	4	49806928	+	4	1
RNA	GCAAAGCAAGTGAAGAACCANGG	cCcAAGgAAaTGAAG-gCCAAGG	scaffold1869	19	-	5	1
RNA	GCAAAGCAAGTGAAGAACCANGG	cCcAAGgAAaTGAAGg-CCAAGG	scaffold1869	19	-	5	1
RNA	GCAAAGCAAGTGAAGAACCANGG	cCAAAGCAAGcagAG-gCCACGG	scaffold1006	1433	-	5	1
RNA	GCAAAGCAAGTGAAGAACCANGG	cCAAAGCAAGcagAGg-CCACGG	scaffold1006	1433	-	5	1
RNA	GCAAAGCAAGTGAAGAACCANGG	atgAAtCAAGTGAcG-ACCACGG	scaffold0948	548	-	5	1
RNA	GCAAAGCAAGTGAAGAACCANGG	atgAAtCAAGTGAcGA-CCACGG	scaffold0948	548	-	5	1
RNA	GCAAAGCAAGTGAAGAACCANGG	GaggAGCAgGTGAAG-tCCAAGG	scaffold0966	3422	-	5	1
RNA	GCAAAGCAAGTGAAGAACCANGG	GaggAGCAgGTGAAGt-CCAAGG	scaffold0966	3422	-	5	1
RNA	GCAAAGCAAGTGAAGAACCANGG	tCcAAGtcAGTGAAG-tCCATGG	scaffold0885	2996	-	5	1
RNA	GCAAAGCAAGTGAAGAACCANGG	tCcAAGtcAGTGAAGt-CCATGG	scaffold0885	2996	-	5	1
RNA	GCAAAGCAAGTGAAGAACCANGG	GaAgAcCAAGgGAcG-ACCACGG	scaffold0849	1048	-	5	1
RNA	GCAAAGCAAGTGAAGAACCANGG	GaAgAcCAAGgGAcGA-CCACGG	scaffold0849	1048	-	5	1
RNA	GCAAAGCAAGTGAAGAACCANGG	GCtAAGaAgGcGAAG-ACgATGG	scaffold0732	4855	-	5	1
RNA	GCAAAGCAAGTGAAGAACCANGG	GCtAAGaAgGcGAAGA-CgATGG	scaffold0732	4855	-	5	1
RNA	GCAAAGCAAGTGAAGAACCANGG	tCAAAGCAAGTGAgc-AgCtTGG	scaffold0660	7749	+	5	1
RNA	GCAAAGCAAGTGAAGAACCANGG	tCAAAGCAAGTGAgcA-gCtTGG	scaffold0660	7749	+	5	1
RNA	GCAAAGCAAGTGAAGAACCANGG	GCAtAGCAAGgGAAG-AtgcTGG	scaffold0594	5180	+	5	1
RNA	GCAAAGCAAGTGAAGAACCANGG	GCAtAGCAAGgGAAGA-tgcTGG	scaffold0594	5180	+	5	1
RNA	GCAAAGCAAGTGAAGAACCANGG	GCcAAGCAAtgGAAG-AgaATGG	scaffold0508	9347	+	5	1
RNA	GCAAAGCAAGTGAAGAACCANGG	GCcAAGCAAtgGAAGA-gaATGG	scaffold0508	9347	+	5	1
RNA	GCAAAGCAAGTGAAGAACCANGG	cgAAAGCAAcTaAAa-ACCATGG	scaffold0505	6733	-	5	1
RNA	GCAAAGCAAGTGAAGAACCANGG	cgAAAGCAAcTaAAaA-CCATGG	scaffold0505	6733	-	5	1
RNA	GCAAAGCAAGTGAAGAACCANGG	tCcAAGtAAGTtAAG-AtCAAGG	scaffold0367	11371	+	5	1
RNA	GCAAAGCAAGTGAAGAACCANGG	tCcAAGtAAGTtAAGA-tCAAGG	scaffold0367	11371	+	5	1
RNA	GCAAAGCAAGTGAAGAACCANGG	GtgAAGCAAaTGAAa-ACgATGG	scaffold0231	9188	+	5	1
RNA	GCAAAGCAAGTGAAGAACCANGG	GtgAAGCAAaTGAAaA-CgATGG	scaffold0231	9188	+	5	1
RNA	GCAAAGCAAGTGAAGAACCANGG	GttAAGCAAGaGAAG-gCaATGG	scaffold0202	17461	-	5	1
RNA	GCAAAGCAAGTGAAGAACCANGG	GttAAGCAAGaGAAGg-CaATGG	scaffold0202	17461	-	5	1
RNA	GCAAAGCAAGTGAAGAACCANGG	aaAgAGCAAGaGAAt-ACCAAGG	scaffold0150	29676	+	5	1
RNA	GCAAAGCAAGTGAAGAACCANGG	aaAgAGCAAGaGAAtA-CCAAGG	scaffold0150	29676	+	5	1
RNA	GCAAAGCAAGTGAAGAACCANGG	tgAAAGtAAGTGAAa-AtCATGG	scaffold0131	12327	+	5	1
RNA	GCAAAGCAAGTGAAGAACCANGG	tgAAAGtAAGTGAAaA-tCATGG	scaffold0131	12327	+	5	1
RNA	GCAAAGCAAGTGAAGAACCANGG	GCAtAGgAAtTGAAG-AaCtAGG	scaffold0125	6405	+	5	1
RNA	GCAAAGCAAGTGAAGAACCANGG	GCAtAGgAAtTGAAGA-aCtAGG	scaffold0125	6405	+	5	1
RNA	GCAAAGCAAGTGAAGAACCANGG	tCcAAGaAAaTGAAG-gCCAGGG	scaffold0111	4091	+	5	1
RNA	GCAAAGCAAGTGAAGAACCANGG	tCcAAGaAAaTGAAGg-CCAGGG	scaffold0111	4091	+	5	1
RNA	GCAAAGCAAGTGAAGAACCANGG	cCAAAcCAAtTGcAG-tCCAAGG	scaffold0103	40577	-	5	1
RNA	GCAAAGCAAGTGAAGAACCANGG	cCAAAcCAAtTGcAGt-CCAAGG	scaffold0103	40577	-	5	1
RNA	GCAAAGCAAGTGAAGAACCANGG	GCAAAcCtgcTGAAG-ACaAAGG	scaffold0096	25081	+	5	1
RNA	GCAAAGCAAGTGAAGAACCANGG	GCAAAcCtgcTGAAGA-CaAAGG	scaffold0096	25081	+	5	1
RNA	GCAAAGCAAGTGAAGAACCANGG	tCAAAGCAAGTGAgc-AgCtTGG	scaffold0082	38976	+	5	1
RNA	GCAAAGCAAGTGAAGAACCANGG	tCAAAGCAAGTGAgcA-gCtTGG	scaffold0082	38976	+	5	1
RNA	GCAAAGCAAGTGAAGAACCANGG	tCAAAtCtAcTGAAG-ACaAAGG	scaffold0063	40234	+	5	1
RNA	GCAAAGCAAGTGAAGAACCANGG	tCAAAtCtAcTGAAGA-CaAAGG	scaffold0063	40234	+	5	1
RNA	GCAAAGCAAGTGAAGAACCANGG	GgAAtGaAAGgaAAG-ACCAAGG	scaffold0048	72433	+	5	1
RNA	GCAAAGCAAGTGAAGAACCANGG	GgAAtGaAAGgaAAGA-CCAAGG	scaffold0048	72433	+	5	1
RNA	GCAAAGCAAGTGAAGAACCANGG	agAAAGCAgGaGAAa-ACCAGGG	scaffold0045	2235	+	5	1
RNA	GCAAAGCAAGTGAAGAACCANGG	agAAAGCAgGaGAAaA-CCAGGG	scaffold0045	2235	+	5	1
RNA	GCAAAGCAAGTGAAGAACCANGG	cCcAAGgAAaTGAAG-gCCAAGG	scaffold0040	26325	+	5	1
RNA	GCAAAGCAAGTGAAGAACCANGG	cCcAAGgAAaTGAAGg-CCAAGG	scaffold0040	26325	+	5	1
RNA	GCAAAGCAAGTGAAGAACCANGG	aaAAAaCAAGaGAAt-ACCAAGG	scaffold0034	55975	+	5	1
RNA	GCAAAGCAAGTGAAGAACCANGG	aaAAAaCAAGaGAAtA-CCAAGG	scaffold0034	55975	+	5	1
RNA	GCAAAGCAAGTGAAGAACCANGG	GCAtAGCAAGgGAAG-AtgtTGG	scaffold0032	1298	+	5	1
RNA	GCAAAGCAAGTGAAGAACCANGG	GCAtAGCAAGgGAAGA-tgtTGG	scaffold0032	1298	+	5	1
RNA	GCAAAGCAAGTGAAGAACCANGG	GCAtAGgAAtTGAAG-AaCcAGG	scaffold0032	70628	+	5	1
RNA	GCAAAGCAAGTGAAGAACCANGG	GCAtAGgAAtTGAAGA-aCcAGG	scaffold0032	70628	+	5	1
RNA	GCAAAGCAAGTGAAGAACCANGG	GCggAGCAAGcGAAG-AatAAGG	scaffold0033	68980	-	5	1
RNA	GCAAAGCAAGTGAAGAACCANGG	GCggAGCAAGcGAAGA-atAAGG	scaffold0033	68980	-	5	1
RNA	GCAAAGCAAGTGAAGAACCANGG	GCAtAGCtAaatAAG-ACCATGG	scaffold0012	94151	+	5	1
RNA	GCAAAGCAAGTGAAGAACCANGG	GCAtAGCtAaatAAGA-CCATGG	scaffold0012	94151	+	5	1
RNA	GCAAAGCAAGTGAAGAACCANGG	GCcAAGgAgGaGtAG-ACCAAGG	scaffold0009	28810	-	5	1
RNA	GCAAAGCAAGTGAAGAACCANGG	GCcAAGgAgGaGtAGA-CCAAGG	scaffold0009	28810	-	5	1
RNA	GCAAAGCAAGTGAAGAACCANGG	cgAAAGCAgccGAAG-ACCATGG	scaffold0002	377053	-	5	1
RNA	GCAAAGCAAGTGAAGAACCANGG	cgAAAGCAgccGAAGA-CCATGG	scaffold0002	377053	-	5	1
RNA	GCAAAGCAAGTGAAGAACCANGG	GCttAtCAtGTGAAG-ACaAAGG	6	29230	+	5	1
RNA	GCAAAGCAAGTGAAGAACCANGG	GCttAtCAtGTGAAGA-CaAAGG	6	29230	+	5	1
RNA	GCAAAGCAAGTGAAGAACCANGG	GaAAAaCAAagGAAG-AaCAGGG	6	1055841	-	5	1
RNA	GCAAAGCAAGTGAAGAACCANGG	GaAAAaCAAagGAAGA-aCAGGG	6	1055841	-	5	1
RNA	GCAAAGCAAGTGAAGAACCANGG	GtAgAGgAAGTGAAG-gCaACGG	6	2541888	-	5	1
RNA	GCAAAGCAAGTGAAGAACCANGG	GtAgAGgAAGTGAAGg-CaACGG	6	2541888	-	5	1
RNA	GCAAAGCAAGTGAAGAACCANGG	GCAAAGaAAGaGAga-ACCtCGG	6	3122846	-	5	1
RNA	GCAAAGCAAGTGAAGAACCANGG	GCAAAGaAAGaGAgaA-CCtCGG	6	3122846	-	5	1
RNA	GCAAAGCAAGTGAAGAACCANGG	aCAAAGaAAGTGAcG-AgaATGG	6	6672185	-	5	1
RNA	GCAAAGCAAGTGAAGAACCANGG	aCAAAGaAAGTGAcGA-gaATGG	6	6672185	-	5	1
RNA	GCAAAGCAAGTGAAGAACCANGG	GacAAGCAAcTGAAG-AagAGGG	6	7581883	+	5	1
RNA	GCAAAGCAAGTGAAGAACCANGG	GacAAGCAAcTGAAGA-agAGGG	6	7581883	+	5	1
RNA	GCAAAGCAAGTGAAGAACCANGG	GCAAAcaAAGacAAc-ACCACGG	6	7562930	+	5	1
RNA	GCAAAGCAAGTGAAGAACCANGG	GCAAAcaAAGacAAcA-CCACGG	6	7562930	+	5	1
RNA	GCAAAGCAAGTGAAGAACCANGG	GCAAAGaAAaTcAAa-ACtAAGG	6	8314596	+	5	1
RNA	GCAAAGCAAGTGAAGAACCANGG	GCAAAGaAAaTcAAaA-CtAAGG	6	8314596	+	5	1
RNA	GCAAAGCAAGTGAAGAACCANGG	cCAAAGaAAGgGAAG-AgaAAGG	6	8703446	+	5	1
RNA	GCAAAGCAAGTGAAGAACCANGG	cCAAAGaAAGgGAAGA-gaAAGG	6	8703446	+	5	1
RNA	GCAAAGCAAGTGAAGAACCANGG	tCAAAGCAAGTGAgc-AgCtTGG	6	9146748	+	5	1
RNA	GCAAAGCAAGTGAAGAACCANGG	tCAAAGCAAGTGAgcA-gCtTGG	6	9146748	+	5	1
RNA	GCAAAGCAAGTGAAGAACCANGG	GCAgcGCAtGaGAAG-ACaAGGG	6	9502277	+	5	1
RNA	GCAAAGCAAGTGAAGAACCANGG	GCAgcGCAtGaGAAGA-CaAGGG	6	9502277	+	5	1
RNA	GCAAAGCAAGTGAAGAACCANGG	GCAAAGaAAcTcAAG-AaaATGG	6	10025452	+	5	1
RNA	GCAAAGCAAGTGAAGAACCANGG	GCAAAGaAAcTcAAGA-aaATGG	6	10025452	+	5	1
RNA	GCAAAGCAAGTGAAGAACCANGG	aCAAAGCAAtTctAG-AgCAAGG	6	10657092	+	5	1
RNA	GCAAAGCAAGTGAAGAACCANGG	aCAAAGCAAtTctAGA-gCAAGG	6	10657092	+	5	1
RNA	GCAAAGCAAGTGAAGAACCANGG	GgAtAagAAtTGAAG-ACCATGG	6	15998683	+	5	1
RNA	GCAAAGCAAGTGAAGAACCANGG	GgAtAagAAtTGAAGA-CCATGG	6	15998683	+	5	1
RNA	GCAAAGCAAGTGAAGAACCANGG	GgAAAaCgAGTGAAG-AagAAGG	6	15838166	-	5	1
RNA	GCAAAGCAAGTGAAGAACCANGG	GgAAAaCgAGTGAAGA-agAAGG	6	15838166	-	5	1
RNA	GCAAAGCAAGTGAAGAACCANGG	ctAAAGaAAGTGAAG-gCaAAGG	6	16205662	-	5	1
RNA	GCAAAGCAAGTGAAGAACCANGG	ctAAAGaAAGTGAAGg-CaAAGG	6	16205662	-	5	1
RNA	GCAAAGCAAGTGAAGAACCANGG	GCAAAaCAttTGAAG-ACttTGG	6	16167677	-	5	1
RNA	GCAAAGCAAGTGAAGAACCANGG	GCAAAaCAttTGAAGA-CttTGG	6	16167677	-	5	1
RNA	GCAAAGCAAGTGAAGAACCANGG	GCAtAGgAAtTGAAG-AaCtAGG	6	16598697	+	5	1
RNA	GCAAAGCAAGTGAAGAACCANGG	GCAtAGgAAtTGAAGA-aCtAGG	6	16598697	+	5	1
RNA	GCAAAGCAAGTGAAGAACCANGG	GtAAAaCAAGTcAAt-AgCAAGG	6	17718947	-	5	1
RNA	GCAAAGCAAGTGAAGAACCANGG	GtAAAaCAAGTcAAtA-gCAAGG	6	17718947	-	5	1
RNA	GCAAAGCAAGTGAAGAACCANGG	GCAtAGCAAGgGAAG-AtgtTGG	6	18380573	-	5	1
RNA	GCAAAGCAAGTGAAGAACCANGG	GCAtAGCAAGgGAAGA-tgtTGG	6	18380573	-	5	1
RNA	GCAAAGCAAGTGAAGAACCANGG	GCAAAGCAttaGAgG-AtCAAGG	6	20387540	-	5	1
RNA	GCAAAGCAAGTGAAGAACCANGG	GCAAAGCAttaGAgGA-tCAAGG	6	20387540	-	5	1
RNA	GCAAAGCAAGTGAAGAACCANGG	cCAAAaCAAGaaAAt-ACCATGG	6	21760177	+	5	1
RNA	GCAAAGCAAGTGAAGAACCANGG	cCAAAaCAAGaaAAtA-CCATGG	6	21760177	+	5	1
RNA	GCAAAGCAAGTGAAGAACCANGG	GtgAAGCAtGTGAAa-AaCATGG	6	22554065	-	5	1
RNA	GCAAAGCAAGTGAAGAACCANGG	GtgAAGCAtGTGAAaA-aCATGG	6	22554065	-	5	1
RNA	GCAAAGCAAGTGAAGAACCANGG	GCAAAGCAAactAAa-AgCAGGG	6	23631145	+	5	1
RNA	GCAAAGCAAGTGAAGAACCANGG	GCAAAGCAAactAAaA-gCAGGG	6	23631145	+	5	1
RNA	GCAAAGCAAGTGAAGAACCANGG	GCAttGgAAGTGtAG-AaCAAGG	6	24259454	-	5	1
RNA	GCAAAGCAAGTGAAGAACCANGG	GCAttGgAAGTGtAGA-aCAAGG	6	24259454	-	5	1
RNA	GCAAAGCAAGTGAAGAACCANGG	GgAAAGCAAGTcAAa-gaCATGG	6	24916239	+	5	1
RNA	GCAAAGCAAGTGAAGAACCANGG	GgAAAGCAAGTcAAag-aCATGG	6	24916239	+	5	1
RNA	GCAAAGCAAGTGAAGAACCANGG	agAAAGCAAGaGAga-ACCAAGG	6	25559015	+	5	1
RNA	GCAAAGCAAGTGAAGAACCANGG	agAAAGCAAGaGAgaA-CCAAGG	6	25559015	+	5	1
RNA	GCAAAGCAAGTGAAGAACCANGG	taAcAGCAAGTGAAc-cCCACGG	6	27159430	-	5	1
RNA	GCAAAGCAAGTGAAGAACCANGG	taAcAGCAAGTGAAcc-CCACGG	6	27159430	-	5	1
RNA	GCAAAGCAAGTGAAGAACCANGG	GacAAGaAAGTaAAG-AaCACGG	6	29255088	-	5	1
RNA	GCAAAGCAAGTGAAGAACCANGG	GacAAGaAAGTaAAGA-aCACGG	6	29255088	-	5	1
RNA	GCAAAGCAAGTGAAGAACCANGG	GgAgAaCAAGTGAAG-AtaATGG	6	29530685	-	5	1
RNA	GCAAAGCAAGTGAAGAACCANGG	GgAgAaCAAGTGAAGA-taATGG	6	29530685	-	5	1
RNA	GCAAAGCAAGTGAAGAACCANGG	aCcAAGaAAGTGAAG-caCAAGG	6	29753553	-	5	1
RNA	GCAAAGCAAGTGAAGAACCANGG	aCcAAGaAAGTGAAGc-aCAAGG	6	29753553	-	5	1
RNA	GCAAAGCAAGTGAAGAACCANGG	aCcAAGaAAGTGAAG-caCACGG	6	29766211	-	5	1
RNA	GCAAAGCAAGTGAAGAACCANGG	aCcAAGaAAGTGAAGc-aCACGG	6	29766211	-	5	1
RNA	GCAAAGCAAGTGAAGAACCANGG	GCAAAaCAAGTatAa-ACaAAGG	6	30127931	-	5	1
RNA	GCAAAGCAAGTGAAGAACCANGG	GCAAAaCAAGTatAaA-CaAAGG	6	30127931	-	5	1
RNA	GCAAAGCAAGTGAAGAACCANGG	GaAAAGCAtGacAAG-AaCAAGG	6	31691947	-	5	1
RNA	GCAAAGCAAGTGAAGAACCANGG	GaAAAGCAtGacAAGA-aCAAGG	6	31691947	-	5	1
RNA	GCAAAGCAAGTGAAGAACCANGG	cgAtAaCAAGTaAAG-ACCAAGG	6	32459771	-	5	1
RNA	GCAAAGCAAGTGAAGAACCANGG	cgAtAaCAAGTaAAGA-CCAAGG	6	32459771	-	5	1
RNA	GCAAAGCAAGTGAAGAACCANGG	GCAAAGCAAGTaAAa-AaagTGG	5	762907	+	5	1
RNA	GCAAAGCAAGTGAAGAACCANGG	GCAAAGCAAGTaAAaA-aagTGG	5	762907	+	5	1
RNA	GCAAAGCAAGTGAAGAACCANGG	GtAAAGgActTGAAG-ACaAGGG	5	3017210	+	5	1
RNA	GCAAAGCAAGTGAAGAACCANGG	GtAAAGgActTGAAGA-CaAGGG	5	3017210	+	5	1
RNA	GCAAAGCAAGTGAAGAACCANGG	tCAAAaCAAGTGcAa-ACCtGGG	5	2717220	-	5	1
RNA	GCAAAGCAAGTGAAGAACCANGG	tCAAAaCAAGTGcAaA-CCtGGG	5	2717220	-	5	1
RNA	GCAAAGCAAGTGAAGAACCANGG	cCAAAcCAAaaGAAG-ACaATGG	5	4059595	-	5	1
RNA	GCAAAGCAAGTGAAGAACCANGG	cCAAAcCAAaaGAAGA-CaATGG	5	4059595	-	5	1
RNA	GCAAAGCAAGTGAAGAACCANGG	GaAtAGgAAGaGAAG-ACgATGG	5	5546561	+	5	1
RNA	GCAAAGCAAGTGAAGAACCANGG	GaAtAGgAAGaGAAGA-CgATGG	5	5546561	+	5	1
RNA	GCAAAGCAAGTGAAGAACCANGG	agAAAGCAAGaGAga-ACCAAGG	5	7507121	+	5	1
RNA	GCAAAGCAAGTGAAGAACCANGG	agAAAGCAAGaGAgaA-CCAAGG	5	7507121	+	5	1
RNA	GCAAAGCAAGTGAAGAACCANGG	GagAAGaAAGTaAtG-ACCATGG	5	7347269	-	5	1
RNA	GCAAAGCAAGTGAAGAACCANGG	GagAAGaAAGTaAtGA-CCATGG	5	7347269	-	5	1
RNA	GCAAAGCAAGTGAAGAACCANGG	GaAAAaCAAGTGAAa-AaCcAGG	5	8376215	-	5	1
RNA	GCAAAGCAAGTGAAGAACCANGG	GaAAAaCAAGTGAAaA-aCcAGG	5	8376215	-	5	1
RNA	GCAAAGCAAGTGAAGAACCANGG	GCAAtGCAAGTaAgG-AatATGG	5	9990395	+	5	1
RNA	GCAAAGCAAGTGAAGAACCANGG	GCAAtGCAAGTaAgGA-atATGG	5	9990395	+	5	1
RNA	GCAAAGCAAGTGAAGAACCANGG	cCAAAtaAAaTGAAG-AaCAAGG	5	11735855	-	5	1
RNA	GCAAAGCAAGTGAAGAACCANGG	cCAAAtaAAaTGAAGA-aCAAGG	5	11735855	-	5	1
RNA	GCAAAGCAAGTGAAGAACCANGG	GCAAgGCcAGTGgAt-cCCAAGG	5	12042850	+	5	1
RNA	GCAAAGCAAGTGAAGAACCANGG	GCAAgGCcAGTGgAtc-CCAAGG	5	12042850	+	5	1
RNA	GCAAAGCAAGTGAAGAACCANGG	agAAAGCAAGaGAga-ACCAAGG	5	11996126	-	5	1
RNA	GCAAAGCAAGTGAAGAACCANGG	agAAAGCAAGaGAgaA-CCAAGG	5	11996126	-	5	1
RNA	GCAAAGCAAGTGAAGAACCANGG	tCAAcaCAAGTGAAG-AtaAAGG	5	12343788	+	5	1
RNA	GCAAAGCAAGTGAAGAACCANGG	tCAAcaCAAGTGAAGA-taAAGG	5	12343788	+	5	1
RNA	GCAAAGCAAGTGAAGAACCANGG	GCAAAGacAGTcAAG-tCaATGG	5	12641514	+	5	1
RNA	GCAAAGCAAGTGAAGAACCANGG	GCAAAGacAGTcAAGt-CaATGG	5	12641514	+	5	1
RNA	GCAAAGCAAGTGAAGAACCANGG	GCAgAGaAAGaGAct-ACCATGG	5	12423160	-	5	1
RNA	GCAAAGCAAGTGAAGAACCANGG	GCAgAGaAAGaGActA-CCATGG	5	12423160	-	5	1
RNA	GCAAAGCAAGTGAAGAACCANGG	GagAAGaAAGTGAtt-ACCAAGG	5	13637830	+	5	1
RNA	GCAAAGCAAGTGAAGAACCANGG	GagAAGaAAGTGAttA-CCAAGG	5	13637830	+	5	1
RNA	GCAAAGCAAGTGAAGAACCANGG	GCAAAtCAAGTGAtG-AaggAGG	5	14417407	+	5	1
RNA	GCAAAGCAAGTGAAGAACCANGG	GCAAAtCAAGTGAtGA-aggAGG	5	14417407	+	5	1
RNA	GCAAAGCAAGTGAAGAACCANGG	GCcAAtCtAGTGAAG-ACttTGG	5	14849183	+	5	1
RNA	GCAAAGCAAGTGAAGAACCANGG	GCcAAtCtAGTGAAGA-CttTGG	5	14849183	+	5	1
RNA	GCAAAGCAAGTGAAGAACCANGG	GaAcAGaAtGTGAAG-ACCgAGG	5	15011459	-	5	1
RNA	GCAAAGCAAGTGAAGAACCANGG	GaAcAGaAtGTGAAGA-CCgAGG	5	15011459	-	5	1
RNA	GCAAAGCAAGTGAAGAACCANGG	GgAAAcaAAGTacAG-ACCATGG	5	17291633	-	5	1
RNA	GCAAAGCAAGTGAAGAACCANGG	GgAAAcaAAGTacAGA-CCATGG	5	17291633	-	5	1
RNA	GCAAAGCAAGTGAAGAACCANGG	tgAAAGCtAGTGAAa-ACCtTGG	5	18900228	+	5	1
RNA	GCAAAGCAAGTGAAGAACCANGG	tgAAAGCtAGTGAAaA-CCtTGG	5	18900228	+	5	1
RNA	GCAAAGCAAGTGAAGAACCANGG	GaAAAcaAAtTaAAG-ACCAAGG	5	20142941	+	5	1
RNA	GCAAAGCAAGTGAAGAACCANGG	GaAAAcaAAtTaAAGA-CCAAGG	5	20142941	+	5	1
RNA	GCAAAGCAAGTGAAGAACCANGG	agAAAGCAAGaGAga-ACCAAGG	5	20348126	-	5	1
RNA	GCAAAGCAAGTGAAGAACCANGG	agAAAGCAAGaGAgaA-CCAAGG	5	20348126	-	5	1
RNA	GCAAAGCAAGTGAAGAACCANGG	agAAAGCAAGaGAga-ACCAAGG	5	20341522	-	5	1
RNA	GCAAAGCAAGTGAAGAACCANGG	agAAAGCAAGaGAgaA-CCAAGG	5	20341522	-	5	1
RNA	GCAAAGCAAGTGAAGAACCANGG	GCAAAGaAAaaGAAG-AatAGGG	5	23128656	+	5	1
RNA	GCAAAGCAAGTGAAGAACCANGG	GCAAAGaAAaaGAAGA-atAGGG	5	23128656	+	5	1
RNA	GCAAAGCAAGTGAAGAACCANGG	GCAtAGCAAGgGAAG-AtatTGG	5	23448074	+	5	1
RNA	GCAAAGCAAGTGAAGAACCANGG	GCAtAGCAAGgGAAGA-tatTGG	5	23448074	+	5	1
RNA	GCAAAGCAAGTGAAGAACCANGG	GCAtAGCAAGgGAAG-AtatTGG	5	23436707	+	5	1
RNA	GCAAAGCAAGTGAAGAACCANGG	GCAtAGCAAGgGAAGA-tatTGG	5	23436707	+	5	1
RNA	GCAAAGCAAGTGAAGAACCANGG	GCAtAGgAAtTGAAG-AaCtAGG	5	23274192	-	5	1
RNA	GCAAAGCAAGTGAAGAACCANGG	GCAtAGgAAtTGAAGA-aCtAGG	5	23274192	-	5	1
RNA	GCAAAGCAAGTGAAGAACCANGG	GCAAAcCtgcTGAAG-ACaAAGG	5	23489959	-	5	1
RNA	GCAAAGCAAGTGAAGAACCANGG	GCAAAcCtgcTGAAGA-CaAAGG	5	23489959	-	5	1
RNA	GCAAAGCAAGTGAAGAACCANGG	GaAcAGCAAGgGgAG-AgCAAGG	5	24093195	-	5	1
RNA	GCAAAGCAAGTGAAGAACCANGG	GaAcAGCAAGgGgAGA-gCAAGG	5	24093195	-	5	1
RNA	GCAAAGCAAGTGAAGAACCANGG	GaAgAcCAAGTGAgG-tCCATGG	5	27597822	+	5	1
RNA	GCAAAGCAAGTGAAGAACCANGG	GaAgAcCAAGTGAgGt-CCATGG	5	27597822	+	5	1
RNA	GCAAAGCAAGTGAAGAACCANGG	tCAAAGagAaTGAAG-gCCATGG	5	28168080	-	5	1
RNA	GCAAAGCAAGTGAAGAACCANGG	tCAAAGagAaTGAAGg-CCATGG	5	28168080	-	5	1
RNA	GCAAAGCAAGTGAAGAACCANGG	aCAAAGCAtGcaAAG-tCCAAGG	5	28837068	-	5	1
RNA	GCAAAGCAAGTGAAGAACCANGG	aCAAAGCAtGcaAAGt-CCAAGG	5	28837068	-	5	1
RNA	GCAAAGCAAGTGAAGAACCANGG	GCAAAtCAtGTatAa-ACCAAGG	5	29536359	-	5	1
RNA	GCAAAGCAAGTGAAGAACCANGG	GCAAAtCAtGTatAaA-CCAAGG	5	29536359	-	5	1
RNA	GCAAAGCAAGTGAAGAACCANGG	GttAAGCAAGaGAAG-AtaAAGG	5	29654921	-	5	1
RNA	GCAAAGCAAGTGAAGAACCANGG	GttAAGCAAGaGAAGA-taAAGG	5	29654921	-	5	1
RNA	GCAAAGCAAGTGAAGAACCANGG	aCAAAGtAgGTGAAG-cCaATGG	5	30216878	-	5	1
RNA	GCAAAGCAAGTGAAGAACCANGG	aCAAAGtAgGTGAAGc-CaATGG	5	30216878	-	5	1
RNA	GCAAAGCAAGTGAAGAACCANGG	GtgAAGaAgGTGAAG-AaCAAGG	5	30373044	-	5	1
RNA	GCAAAGCAAGTGAAGAACCANGG	GtgAAGaAgGTGAAGA-aCAAGG	5	30373044	-	5	1
RNA	GCAAAGCAAGTGAAGAACCANGG	GtAtAGCAAGaGAAG-cCaAGGG	5	31831690	+	5	1
RNA	GCAAAGCAAGTGAAGAACCANGG	GtAtAGCAAGaGAAGc-CaAGGG	5	31831690	+	5	1
RNA	GCAAAGCAAGTGAAGAACCANGG	GtAtAGCAAGaGAAG-cCaAGGG	5	31816660	+	5	1
RNA	GCAAAGCAAGTGAAGAACCANGG	GtAtAGCAAGaGAAGc-CaAGGG	5	31816660	+	5	1
RNA	GCAAAGCAAGTGAAGAACCANGG	tgAAcGCAAtTGAAG-AgCAAGG	5	32626225	-	5	1
RNA	GCAAAGCAAGTGAAGAACCANGG	tgAAcGCAAtTGAAGA-gCAAGG	5	32626225	-	5	1
RNA	GCAAAGCAAGTGAAGAACCANGG	cCAttGCAAaTGAAG-tCCAAGG	5	37149760	-	5	1
RNA	GCAAAGCAAGTGAAGAACCANGG	cCAttGCAAaTGAAGt-CCAAGG	5	37149760	-	5	1
RNA	GCAAAGCAAGTGAAGAACCANGG	GCAAcGaAAtTGAAG-tCCtTGG	5	37831994	+	5	1
RNA	GCAAAGCAAGTGAAGAACCANGG	GCAAcGaAAtTGAAGt-CCtTGG	5	37831994	+	5	1
RNA	GCAAAGCAAGTGAAGAACCANGG	GaAgAGgAAGTGgAG-gCCAAGG	5	39126777	-	5	1
RNA	GCAAAGCAAGTGAAGAACCANGG	GaAgAGgAAGTGgAGg-CCAAGG	5	39126777	-	5	1
RNA	GCAAAGCAAGTGAAGAACCANGG	GgAAAatAcGTGAAG-ACaATGG	8	3213501	+	5	1
RNA	GCAAAGCAAGTGAAGAACCANGG	GgAAAatAcGTGAAGA-CaATGG	8	3213501	+	5	1
RNA	GCAAAGCAAGTGAAGAACCANGG	GCAAAaCAAaTtAAa-AaCATGG	8	4810446	+	5	1
RNA	GCAAAGCAAGTGAAGAACCANGG	GCAAAaCAAaTtAAaA-aCATGG	8	4810446	+	5	1
RNA	GCAAAGCAAGTGAAGAACCANGG	cCAAAGCAAGTattG-cCCATGG	8	5489263	-	5	1
RNA	GCAAAGCAAGTGAAGAACCANGG	cCAAAGCAAGTattGc-CCATGG	8	5489263	-	5	1
RNA	GCAAAGCAAGTGAAGAACCANGG	GtgAAcCAAGTGAAG-AaCtTGG	8	6905011	+	5	1
RNA	GCAAAGCAAGTGAAGAACCANGG	GtgAAcCAAGTGAAGA-aCtTGG	8	6905011	+	5	1
RNA	GCAAAGCAAGTGAAGAACCANGG	GtAAAGCAAGacAAc-AaCATGG	8	6951712	+	5	1
RNA	GCAAAGCAAGTGAAGAACCANGG	GtAAAGCAAGacAAcA-aCATGG	8	6951712	+	5	1
RNA	GCAAAGCAAGTGAAGAACCANGG	GgAAtGCAAGaGAtG-ACCcTGG	8	7152695	+	5	1
RNA	GCAAAGCAAGTGAAGAACCANGG	GgAAtGCAAGaGAtGA-CCcTGG	8	7152695	+	5	1
RNA	GCAAAGCAAGTGAAGAACCANGG	GCgAAGaAAGTaAtG-AaCATGG	8	7170235	+	5	1
[truncated: 2,034 more rows]

## Sheet: CYP72A61 gRNA1
#Bulge type	crRNA	DNA	Chromosome	Position	Direction	Mismatches	Bulge Size
X	GCAATAGTATGAACAACAAANGG	GCAATAGTATGAACAACAAAAGG	4	11016525	-	0	0
RNA	GCAATAGTATGAACAACAAANGG	GgAATAGTATGAAC-ACAAATGG	7	21147910	-	1	1
RNA	GCAATAGTATGAACAACAAANGG	GgAATAGTATGAACA-CAAATGG	7	21147910	-	1	1
RNA	GCAATAGTATGAACAACAAANGG	c-AATAGTATGAACAACAAAAGG	4	11016525	-	1	1
DNA	G-CAATAGTATGAACAACAAANGG	aGCAATAGTATGAACAACAAAAGG	4	11016525	-	1	1
RNA	GCAATAGTATGAACAACAAANGG	tCAATtGT-TGAACAACAAAAGG	2	35797398	+	2	1
RNA	GCAATAGTATGAACAACAAANGG	GCAATA-TATGcACcACAAAGGG	5	22700503	+	2	1
RNA	GCAATAGTATGAACAACAAANGG	GCAATA-TATGcACcACAAAGGG	2	33238353	-	2	1
RNA	GCAATAGTATGAACAACAAANGG	GCAATA-TATGcACcACAAAGGG	2	33246274	-	2	1
RNA	GCAATAGTATGAACAACAAANGG	GCAATA-TATGcACcACAAAGGG	1	33467362	-	2	1
RNA	GCAATAGTATGAACAACAAANGG	GCAATA-TATGcACcACAAAGGG	1	33477414	-	2	1
RNA	GCAATAGTATGAACAACAAANGG	GCAATA-TATGcACcACAAAGGG	1	34506552	-	2	1
RNA	GCAATAGTATGAACAACAAANGG	GCAATAGaA-GAgCAACAAAAGG	2	41477255	+	2	1
RNA	GCAATAGTATGAACAACAAANGG	GgAATAGTATGAA-cACAAATGG	7	21147910	-	2	1
RNA	GCAATAGTATGAACAACAAANGG	GCAAgAaTATGAACAA-AAAGGG	2	7650495	-	2	1
RNA	GCAATAGTATGAACAACAAANGG	GgAATAGTATGAACAc-AAATGG	7	21147910	-	2	1
RNA	GCAATAGTATGAACAACAAANGG	GCAAaAGTATGAtC-ACAAATGG	6	1194006	+	2	1
RNA	GCAATAGTATGAACAACAAANGG	GCAAaAGTATGAtCA-CAAATGG	6	1194006	+	2	1
RNA	GCAATAGTATGAACAACAAANGG	GCAATAG-AgGAgCAACAAAAGG	2	41484261	+	2	1
RNA	GCAATAGTATGAACAACAAANGG	GCAATAG-AaGAgCAACAAAAGG	2	41477255	+	2	1
RNA	GCAATAGTATGAACAACAAANGG	tCAAT-GTAaGAACAACAAAAGG	4	47793842	-	2	1
RNA	GCAATAGTATGAACAACAAANGG	ca-ATAGTATGAACAACAAAAGG	4	11016525	-	2	1
RNA	GCAATAGTATGAACAACAAANGG	caA-TAGTATGAACAACAAAAGG	4	11016525	-	2	1
DNA	GCAATAGTATGAACAA-CAAANGG	GggATAGTATGAACAATCAAAGGG	6	16446052	+	2	1
DNA	GCAATAGTAT-GAACAACAAANGG	cCAATAGTATAGAACAAgAAATGG	5	37627819	-	2	1
DNA	GCAATAGTAT-GAACAACAAANGG	cCAATAGTATAGAACAAgAAATGG	5	37806942	-	2	1
DNA	GCAATAGTAT-GAACAACAAANGG	cCAATAGTATAGAACAAgAAATGG	8	7098303	-	2	1
DNA	GCAATAGTAT-GAACAACAAANGG	cCAATAGTATAGAACAAgAAATGG	8	7094570	-	2	1
DNA	GCAATAGTAT-GAACAACAAANGG	cCAATAGTATAGAACAAgAAATGG	7	1609254	-	2	1
DNA	GCAATAGTAT-GAACAACAAANGG	cCAATAGTATAGAACAAgAAATGG	7	19633345	-	2	1
DNA	GCAATAGTAT-GAACAACAAANGG	cCAATAGTATAGAACAAgAAATGG	1	22362433	+	2	1
DNA	GCAATAGTAT-GAACAACAAANGG	cCAATAGTATAGAACAAgAAATGG	1	41314684	-	2	1
DNA	GCAATAGTAT-GAACAACAAANGG	cCAATAGTATAGAACAAgAAATGG	3	8377206	+	2	1
DNA	GCAATAGT-ATGAACAACAAANGG	GCAcTAGTTATGAAaAACAAAGGG	1	1633326	-	2	1
DNA	GCAATAG-TATGAACAACAAANGG	GCAcTAGTTATGAAaAACAAAGGG	1	1633326	-	2	1
DNA	GC-AATAGTATGAACAACAAANGG	agCAATAGTATGAACAACAAAAGG	4	11016525	-	2	1
RNA	GCAATAGTATGAACAACAAANGG	GCAAgAGT-TGtACAACgAAGGG	6	21983468	-	3	1
RNA	GCAATAGTATGAACAACAAANGG	aCAATcaT-TGAACAACAAAAGG	6	27599520	+	3	1
RNA	GCAATAGTATGAACAACAAANGG	GCAATAGT-cGAAgAACtAACGG	5	2300869	+	3	1
RNA	GCAATAGTATGAACAACAAANGG	GCtATAcT-TGcACAACAAATGG	8	8008616	+	3	1
RNA	GCAATAGTATGAACAACAAANGG	GCAATAGa-gGAgCAACAAAAGG	2	41484261	+	3	1
RNA	GCAATAGTATGAACAACAAANGG	GCAATAGa-aGAgCAACAAAAGG	2	41477255	+	3	1
RNA	GCAATAGTATGAACAACAAANGG	GCAATgGT-TatACAACAAATGG	1	35331381	+	3	1
RNA	GCAATAGTATGAACAACAAANGG	GCAgTtGT-TGAACAACAAgTGG	3	52601156	-	3	1
RNA	GCAATAGTATGAACAACAAANGG	aCAATAGg-TGAAaAACAAAAGG	3	55478143	-	3	1
RNA	GCAATAGTATGAACAACAAANGG	GCAATAGT-TGAAtAAgAcATGG	4	822659	+	3	1
RNA	GCAATAGTATGAACAACAAANGG	GaAATA-TATGgACAACAAtTGG	scaffold0002	342229	-	3	1
RNA	GCAATAGTATGAACAACAAANGG	GaAAaA-TATGAAaAACAAAGGG	5	35612506	+	3	1
RNA	GCAATAGTATGAACAACAAANGG	GgAAaA-TATGAACAtCAAAAGG	8	5909193	+	3	1
RNA	GCAATAGTATGAACAACAAANGG	GCAAaA-aATGAACAAgAAACGG	8	29479233	-	3	1
RNA	GCAATAGTATGAACAACAAANGG	GCAATA-cATtAACAACAcATGG	8	37515163	+	3	1
RNA	GCAATAGTATGAACAACAAANGG	GCAATA-TATGAACAtgAAgCGG	8	45535266	-	3	1
RNA	GCAATAGTATGAACAACAAANGG	GCAATA-gAgGAgCAACAAAAGG	2	41484261	+	3	1
RNA	GCAATAGTATGAACAACAAANGG	GCAATA-gAaGAgCAACAAAAGG	2	41477255	+	3	1
RNA	GCAATAGTATGAACAACAAANGG	GgAATA-TATGgACAtCAAATGG	7	29563861	-	3	1
RNA	GCAATAGTATGAACAACAAANGG	atAATA-TATGAAaAACAAACGG	7	30707087	-	3	1
RNA	GCAATAGTATGAACAACAAANGG	GCAAcA-TATGAACAAgAgAAGG	7	33442728	-	3	1
RNA	GCAATAGTATGAACAACAAANGG	GCAATt-TAgGAACAAtAAAAGG	1	40171821	+	3	1
RNA	GCAATAGTATGAACAACAAANGG	aCAAaA-TATGAAaAACAAATGG	1	51734581	-	3	1
RNA	GCAATAGTATGAACAACAAANGG	GCAATA-TATGAACAtgAAgTGG	3	24564176	+	3	1
RNA	GCAATAGTATGAACAACAAANGG	GCAATAtTAT-cACAAtAAATGG	scaffold0863	3379	-	3	1
RNA	GCAATAGTATGAACAACAAANGG	GtAcTAGTcT-AACAACAAATGG	scaffold0393	8317	+	3	1
RNA	GCAATAGTATGAACAACAAANGG	GCAATAGcAT-AAtAAaAAATGG	6	13791706	-	3	1
RNA	GCAATAGTATGAACAACAAANGG	GCAATAGaAT-AAtAAaAAATGG	6	13805925	-	3	1
RNA	GCAATAGTATGAACAACAAANGG	GCAATAGaAT-AAtAAaAAATGG	6	13784339	-	3	1
RNA	GCAATAGTATGAACAACAAANGG	cCAATAGaAa-AACAACAAATGG	6	15837157	+	3	1
RNA	GCAATAGTATGAACAACAAANGG	GCAATAtTAT-cACAAtAAATGG	5	21612580	-	3	1
RNA	GCAATAGTATGAACAACAAANGG	aCAATAGTAT-AACAAatAATGG	8	13363022	+	3	1
RNA	GCAATAGTATGAACAACAAANGG	GCAATcaTAT-AACAACAAgAGG	2	33021110	-	3	1
RNA	GCAATAGTATGAACAACAAANGG	GCAATAGaAg-AgCAACAAAAGG	2	41477255	+	3	1
RNA	GCAATAGTATGAACAACAAANGG	GCAATAtTAT-cACAAtAAATGG	7	16159190	-	3	1
RNA	GCAATAGTATGAACAACAAANGG	aCAATAGaAT-AAgAACAAAGGG	7	42660393	-	3	1
RNA	GCAATAGTATGAACAACAAANGG	GCAgTAtTAT-AACAAtAAATGG	1	21130250	-	3	1
RNA	GCAATAGTATGAACAACAAANGG	GCAATAtTAT-cACAAtAAATGG	1	21211624	-	3	1
RNA	GCAATAGTATGAACAACAAANGG	GCAATtcTcT-AACAACAAAGGG	3	54788126	-	3	1
RNA	GCAATAGTATGAACAACAAANGG	GCAA-AGTATacACAAtAAAAGG	6	5012063	+	3	1
RNA	GCAATAGTATGAACAACAAANGG	GaAA-AaTATGAAaAACAAAGGG	5	35612506	+	3	1
RNA	GCAATAGTATGAACAACAAANGG	tCAA-AGTATaAACAAtAAATGG	5	41522983	+	3	1
RNA	GCAATAGTATGAACAACAAANGG	GgAA-AaTATGAACAtCAAAAGG	8	5909193	+	3	1
RNA	GCAATAGTATGAACAACAAANGG	GCAA-AaaATGAACAAgAAACGG	8	29479233	-	3	1
RNA	GCAATAGTATGAACAACAAANGG	cgAA-AGTATGAtCAACAAACGG	8	34232671	-	3	1
RNA	GCAATAGTATGAACAACAAANGG	GCAA-AGTAaGtACAACAAgTGG	2	31987483	-	3	1
RNA	GCAATAGTATGAACAACAAANGG	tCAA-AGTATGAACAgCAAgAGG	2	37565745	+	3	1
RNA	GCAATAGTATGAACAACAAANGG	GCAA-AGTATGcACAAtAAgAGG	7	4516236	+	3	1
RNA	GCAATAGTATGAACAACAAANGG	GtAA-AGTATcAACAAaAAAAGG	7	32714647	-	3	1
RNA	GCAATAGTATGAACAACAAANGG	tCAA-AGaATGAAaAACAAACGG	7	41752205	-	3	1
RNA	GCAATAGTATGAACAACAAANGG	aCAA-AaTATGAAaAACAAATGG	1	51734581	-	3	1
RNA	GCAATAGTATGAACAACAAANGG	GCAA-AGgATGAtaAACAAAAGG	3	23148566	+	3	1
RNA	GCAATAGTATGAACAACAAANGG	GCAA-AGgATGAcaAACAAAAGG	3	23139854	+	3	1
RNA	GCAATAGTATGAACAACAAANGG	GaAA-AtTATGAAaAACAAAGGG	3	36143912	-	3	1
RNA	GCAATAGTATGAACAACAAANGG	GgAA-AGTAacAACAACAAAAGG	4	5262721	-	3	1
RNA	GCAATAGTATGAACAACAAANGG	tgAA-cGTATGAACAACAAAGGG	4	8727527	-	3	1
RNA	GCAATAGTATGAACAACAAANGG	agAAT-GTcTGAACAACAAAAGG	scaffold0001	393226	+	3	1
RNA	GCAATAGTATGAACAACAAANGG	GCtAT-GaATGAACAACtAAAGG	5	13744863	+	3	1
RNA	GCAATAGTATGAACAACAAANGG	GCAAT-aTATGcACcACAAAGGG	5	22700503	+	3	1
RNA	GCAATAGTATGAACAACAAANGG	GaAAT-GTATGAAaAAaAAAGGG	5	33978262	+	3	1
RNA	GCAATAGTATGAACAACAAANGG	GgAAT-GgATGAtCAACAAAGGG	8	7157528	-	3	1
RNA	GCAATAGTATGAACAACAAANGG	GCAtT-GTATGgACcACAAACGG	2	12456119	+	3	1
RNA	GCAATAGTATGAACAACAAANGG	tCAAT-GTATGAACcACAcAAGG	2	29827039	-	3	1
RNA	GCAATAGTATGAACAACAAANGG	GCAAT-aTATGcACcACAAAGGG	2	33246274	-	3	1
RNA	GCAATAGTATGAACAACAAANGG	GCAAT-aTATGcACcACAAAGGG	2	33238353	-	3	1
RNA	GCAATAGTATGAACAACAAANGG	GCcAT-GTtTGAACAACAcATGG	1	3442852	+	3	1
RNA	GCAATAGTATGAACAACAAANGG	GCcAT-GTtTGAACAACAcATGG	1	3403944	-	3	1
RNA	GCAATAGTATGAACAACAAANGG	GCAAT-GTcTGAAgAAgAAAAGG	1	7540221	-	3	1
RNA	GCAATAGTATGAACAACAAANGG	GCAAT-aTATGcACcACAAAGGG	1	33467362	-	3	1
RNA	GCAATAGTATGAACAACAAANGG	GCAAT-aTATGcACcACAAAGGG	1	33477414	-	3	1
RNA	GCAATAGTATGAACAACAAANGG	GCAAT-aTATGcACcACAAAGGG	1	34506552	-	3	1
RNA	GCAATAGTATGAACAACAAANGG	GCAAT-tTAgGAACAAtAAAAGG	1	40171821	+	3	1
RNA	GCAATAGTATGAACAACAAANGG	agAAT-GTATGAACAACAgACGG	3	49248290	+	3	1
RNA	GCAATAGTATGAACAACAAANGG	tgAAc-GTATGAACAACAAAGGG	4	8727527	-	3	1
RNA	GCAATAGTATGAACAACAAANGG	cCAATAGaA-aAACAACAAATGG	6	15837157	+	3	1
RNA	GCAATAGTATGAACAACAAANGG	GCAATAGTc-GAAgAACtAACGG	5	2300869	+	3	1
RNA	GCAATAGTATGAACAACAAANGG	GgAATAGTA-GAACAAtAAgAGG	5	8594067	+	3	1
RNA	GCAATAGTATGAACAACAAANGG	GCAATAcTA-GAttAACAAAAGG	5	16560117	-	3	1
RNA	GCAATAGTATGAACAACAAANGG	GCAAaAaTA-GAAgAACAAATGG	5	33243887	-	3	1
RNA	GCAATAGTATGAACAACAAANGG	cCAAatGTA-GAACAACAAAGGG	2	8508310	-	3	1
RNA	GCAATAGTATGAACAACAAANGG	GCAAaAGTA-GAAaAAaAAAAGG	2	30351072	-	3	1
RNA	GCAATAGTATGAACAACAAANGG	tCAATtGTt-GAACAACAAAAGG	2	35797398	+	3	1
RNA	GCAATAGTATGAACAACAAANGG	GCAATAGag-GAgCAACAAAAGG	2	41484261	+	3	1
RNA	GCAATAGTATGAACAACAAANGG	GCAATAGcA-GAgCAACAcAGGG	2	41470373	+	3	1
RNA	GCAATAGTATGAACAACAAANGG	cCAATAGTATcAA-AtCAAATGG	scaffold0125	20952	-	3	1
RNA	GCAATAGTATGAACAACAAANGG	GCAAaAGTATGAt-cACAAATGG	6	1194006	+	3	1
RNA	GCAATAGTATGAACAACAAANGG	cCAAaAGTATGAA-AACAcATGG	6	4453682	-	3	1
RNA	GCAATAGTATGAACAACAAANGG	GCAATAGgATGAA-AAatAAAGG	8	32731079	+	3	1
RNA	GCAATAGTATGAACAACAAANGG	GCAtTAcTATGgA-AACAAATGG	2	17597979	-	3	1
RNA	GCAATAGTATGAACAACAAANGG	tCAATAGTATtAA-AAaAAAAGG	2	43449306	+	3	1
RNA	GCAATAGTATGAACAACAAANGG	GCAtTAGaATGAt-AACAAAAGG	7	40604441	-	3	1
RNA	GCAATAGTATGAACAACAAANGG	GCAAaAGaATGAA-AAtAAAGGG	1	821856	-	3	1
RNA	GCAATAGTATGAACAACAAANGG	aCAATAaTATGAA-AcCAAAGGG	1	46405023	+	3	1
RNA	GCAATAGTATGAACAACAAANGG	cCAAaAGTATGAA-AACAcATGG	3	47196531	+	3	1
RNA	GCAATAGTATGAACAACAAANGG	aCAATAaTATGAA-AAtAAATGG	3	49546341	+	3	1
X	GCAATAGTATGAACAACAAANGG	GCAgaAGTATGAACAgCAAAGGG	scaffold0865	4636	+	3	0
X	GCAATAGTATGAACAACAAANGG	GCAATAaaATaAACAACAAAAGG	5	23920635	-	3	0
X	GCAATAGTATGAACAACAAANGG	GCAATAGcATcAgCAACAAAAGG	2	26513870	+	3	0
X	GCAATAGTATGAACAACAAANGG	cCAATAGTATcAACAtCAAAAGG	2	30396893	-	3	0
X	GCAATAGTATGAACAACAAANGG	GCAgaAGTATGAACAgCAAAGGG	3	6498634	+	3	0
X	GCAATAGTATGAACAACAAANGG	GCAATAGaAaGAACAAaAAAAGG	3	50691979	-	3	0
X	GCAATAGTATGAACAACAAANGG	GCAgcAGTATGAACAgCAAAGGG	4	4996086	+	3	0
RNA	GCAATAGTATGAACAACAAANGG	GCAAaAGTATaAACAA-gAAAGG	scaffold0321	8600	+	3	1
RNA	GCAATAGTATGAACAACAAANGG	GCAAgtGTATcAACAA-AAAGGG	scaffold0016	3189	-	3	1
RNA	GCAATAGTATGAACAACAAANGG	GCAAaAGTATGAtCAc-AAATGG	6	1194006	+	3	1
RNA	GCAATAGTATGAACAACAAANGG	GCAATAGaATttACAA-AAAGGG	6	21035319	-	3	1
RNA	GCAATAGTATGAACAACAAANGG	GCAtcAGTATaAACAA-AAATGG	6	30251247	-	3	1
RNA	GCAATAGTATGAACAACAAANGG	GCAATAGTATtAttAA-AAATGG	5	200918	-	3	1
RNA	GCAATAGTATGAACAACAAANGG	GCAATgGaATcAACAA-AAAAGG	5	20551183	-	3	1
RNA	GCAATAGTATGAACAACAAANGG	GCAAgtGTATcAACAA-AAAGGG	5	23389256	+	3	1
RNA	GCAATAGTATGAACAACAAANGG	GCAATAGTgTGAACcA-AcATGG	5	23673218	-	3	1
RNA	GCAATAGTATGAACAACAAANGG	GCAATAagATGtACAA-AAATGG	5	29229345	-	3	1
RNA	GCAATAGTATGAACAACAAANGG	GCAATAGgATGAAaAA-tAAAGG	8	32731079	+	3	1
RNA	GCAATAGTATGAACAACAAANGG	GCAATAccAaGAACAA-AAATGG	8	41031316	-	3	1
RNA	GCAATAGTATGAACAACAAANGG	GgAATttTATGAACAA-AAAGGG	2	66906	-	3	1
RNA	GCAATAGTATGAACAACAAANGG	aCAAaAaTATGAACAA-AAAGGG	2	20653816	-	3	1
RNA	GCAATAGTATGAACAACAAANGG	tCAATAGTATtAAaAA-AAAAGG	2	43449306	+	3	1
RNA	GCAATAGTATGAACAACAAANGG	GCAATAtTATcAACAA-AAgTGG	7	269152	+	3	1
RNA	GCAATAGTATGAACAACAAANGG	GCAATAaTATtAAtAA-AAAAGG	3	10808784	+	3	1
RNA	GCAATAGTATGAACAACAAANGG	GCAATAaTATtAAtAA-AAAAGG	3	10799625	+	3	1
RNA	GCAATAGTATGAACAACAAANGG	GCAAgAaTATcAACAA-AAAGGG	4	3499414	+	3	1
RNA	GCAATAGTATGAACAACAAANGG	cCAATgGTATGAAC-ACtAAAGG	6	833774	+	3	1
RNA	GCAATAGTATGAACAACAAANGG	cCAATgGTATGAACA-CtAAAGG	6	833774	+	3	1
RNA	GCAATAGTATGAACAACAAANGG	aCAATAGTAccAAC-ACAAACGG	5	10004468	+	3	1
RNA	GCAATAGTATGAACAACAAANGG	aCAATAGTAccAACA-CAAACGG	5	10004468	+	3	1
RNA	GCAATAGTATGAACAACAAANGG	tCAATAtTtTGAAC-ACAAAGGG	2	6282634	+	3	1
RNA	GCAATAGTATGAACAACAAANGG	tCAATAtTtTGAACA-CAAAGGG	2	6282634	+	3	1
RNA	GCAATAGTATGAACAACAAANGG	GCAAgAaTATGAAC-AaAAAGGG	2	7650495	-	3	1
RNA	GCAATAGTATGAACAACAAANGG	GCAAgAaTATGAACA-aAAAGGG	2	7650495	-	3	1
RNA	GCAATAGTATGAACAACAAANGG	GCAATAtTATcAAC-ACAtATGG	7	20513743	+	3	1
RNA	GCAATAGTATGAACAACAAANGG	GCAATAtTATcAACA-CAtATGG	7	20513743	+	3	1
RNA	GCAATAGTATGAACAACAAANGG	GCAgTtGTcTGAAC-ACAAAGGG	7	24490959	+	3	1
RNA	GCAATAGTATGAACAACAAANGG	GCAgTtGTcTGAACA-CAAAGGG	7	24490959	+	3	1
RNA	GCAATAGTATGAACAACAAANGG	aCAATAaTATtAAC-ACAAAGGG	3	33217627	-	3	1
RNA	GCAATAGTATGAACAACAAANGG	aCAATAaTATtAACA-CAAAGGG	3	33217627	-	3	1
RNA	GCAATAGTATGAACAACAAANGG	G-AtTAGTATGAAgAgCAAAGGG	scaffold0744	2513	+	3	1
RNA	GCAATAGTATGAACAACAAANGG	G-AATAGTcTGAAaAtCAAAAGG	scaffold0530	4781	+	3	1
RNA	GCAATAGTATGAACAACAAANGG	G-AATAGcATGAAaAACAAcAGG	scaffold0056	24146	-	3	1
RNA	GCAATAGTATGAACAACAAANGG	G-AATAGcATGAAaAAtAAATGG	6	2461982	+	3	1
RNA	GCAATAGTATGAACAACAAANGG	G-AATAaTtgGAACAACAAATGG	6	15284546	+	3	1
RNA	GCAATAGTATGAACAACAAANGG	G-gATAGTATGAACAAtcAAAGG	6	16446053	+	3	1
RNA	GCAATAGTATGAACAACAAANGG	t-AATAtcATGAACAACAAATGG	5	7391571	-	3	1
RNA	GCAATAGTATGAACAACAAANGG	G-AAaAaTATGAAaAACAAAGGG	5	35612506	+	3	1
RNA	GCAATAGTATGAACAACAAANGG	c-AATAGTATcAACAtCAAAAGG	2	30396893	-	3	1
RNA	GCAATAGTATGAACAACAAANGG	G-AATAGgATGAAaAAgAAATGG	1	50788119	+	3	1
RNA	GCAATAGTATGAACAACAAANGG	G-AAaAtTATGAAaAACAAAGGG	3	36143912	-	3	1
RNA	GCAATAGTATGAACAACAAANGG	G-AATAtTATcAACAAaAAATGG	3	46536120	-	3	1
RNA	GCAATAGTATGAACAACAAANGG	GCAATAtTATc-ACAAtAAATGG	scaffold0863	3379	-	3	1
RNA	GCAATAGTATGAACAACAAANGG	GCAATAtTATcA-CAAtAAATGG	scaffold0863	3379	-	3	1
RNA	GCAATAGTATGAACAACAAANGG	GCAAaAGTATG-AtcACAAATGG	6	1194006	+	3	1
RNA	GCAATAGTATGAACAACAAANGG	GCAAaAGTATGA-tcACAAATGG	6	1194006	+	3	1
RNA	GCAATAGTATGAACAACAAANGG	GCAATAtTATc-ACAAtAAATGG	5	21612580	-	3	1
RNA	GCAATAGTATGAACAACAAANGG	GCAATAtTATcA-CAAtAAATGG	5	21612580	-	3	1
RNA	GCAATAGTATGAACAACAAANGG	GCAATAtTATc-ACAAtAAATGG	7	16159190	-	3	1
RNA	GCAATAGTATGAACAACAAANGG	GCAATAtTATcA-CAAtAAATGG	7	16159190	-	3	1
RNA	GCAATAGTATGAACAACAAANGG	GgAATAGTATG-AacACAAATGG	7	21147910	-	3	1
RNA	GCAATAGTATGAACAACAAANGG	GgAATAGTATGA-acACAAATGG	7	21147910	-	3	1
RNA	GCAATAGTATGAACAACAAANGG	GCAtTAGaATG-AtAACAAAAGG	7	40604441	-	3	1
RNA	GCAATAGTATGAACAACAAANGG	GCAtTAGaATGA-tAACAAAAGG	7	40604441	-	3	1
RNA	GCAATAGTATGAACAACAAANGG	GCAATAGTtTG-ACAAaAcACGG	1	1311502	+	3	1
RNA	GCAATAGTATGAACAACAAANGG	GCAATAGTtTGA-CAAaAcACGG	1	1311502	+	3	1
RNA	GCAATAGTATGAACAACAAANGG	GCAATAtTATc-ACAAtAAATGG	1	21211624	-	3	1
RNA	GCAATAGTATGAACAACAAANGG	GCAATAtTATcA-CAAtAAATGG	1	21211624	-	3	1
RNA	GCAATAGTATGAACAACAAANGG	cCAATAG-AaaAACAACAAATGG	6	15837157	+	3	1
RNA	GCAATAGTATGAACAACAAANGG	aCAATAG-ATGAAgAAgAAATGG	6	30146930	-	3	1
RNA	GCAATAGTATGAACAACAAANGG	GCAATAt-ATGcACcACAAAGGG	5	22700503	+	3	1
RNA	GCAATAGTATGAACAACAAANGG	GgAATgG-ATGAtCAACAAAGGG	8	7157528	-	3	1
RNA	GCAATAGTATGAACAACAAANGG	GCAAaAa-ATGAACAAgAAACGG	8	29479233	-	3	1
RNA	GCAATAGTATGAACAACAAANGG	GCAATAc-ATtAACAACAcATGG	8	37515163	+	3	1
RNA	GCAATAGTATGAACAACAAANGG	GCAATAt-ATGcACcACAAAGGG	2	33246274	-	3	1
RNA	GCAATAGTATGAACAACAAANGG	GCAATAt-ATGcACcACAAAGGG	2	33238353	-	3	1
RNA	GCAATAGTATGAACAACAAANGG	tCAATtG-tTGAACAACAAAAGG	2	35797398	+	3	1
RNA	GCAATAGTATGAACAACAAANGG	GaAAaAG-ATaAACAACAAAAGG	7	11721831	+	3	1
RNA	GCAATAGTATGAACAACAAANGG	GaAATtG-ATGAAgAACAAAAGG	1	12900177	+	3	1
RNA	GCAATAGTATGAACAACAAANGG	GaAATAG-ATGAACAAtgAAAGG	1	32516405	+	3	1
RNA	GCAATAGTATGAACAACAAANGG	GCAATAt-ATGcACcACAAAGGG	1	33477414	-	3	1
RNA	GCAATAGTATGAACAACAAANGG	GCAATAt-ATGcACcACAAAGGG	1	33467362	-	3	1
RNA	GCAATAGTATGAACAACAAANGG	GCAATAt-ATGcACcACAAAGGG	1	34506552	-	3	1
RNA	GCAATAGTATGAACAACAAANGG	GCAtaAG-ATGAACAAgAAAAGG	3	44535427	+	3	1
RNA	GCAATAGTATGAACAACAAANGG	aCAATAG-gTGAAaAACAAAAGG	3	55478143	-	3	1
RNA	GCAATAGTATGAACAACAAANGG	Gg-ATAGTATGAACAAtcAAAGG	6	16446053	+	3	1
RNA	GCAATAGTATGAACAACAAANGG	GgA-TAGTATGAACAAtcAAAGG	6	16446053	+	3	1
RNA	GCAATAGTATGAACAACAAANGG	GC-ATAGTAgGAAtAACAgAAGG	8	4077956	+	3	1
RNA	GCAATAGTATGAACAACAAANGG	GCA-TAGTAgGAAtAACAgAAGG	8	4077956	+	3	1
RNA	GCAATAGTATGAACAACAAANGG	GC-ATtGTATGgACcACAAACGG	2	12456119	+	3	1
RNA	GCAATAGTATGAACAACAAANGG	GCA-TtGTATGgACcACAAACGG	2	12456119	+	3	1
RNA	GCAATAGTATGAACAACAAANGG	GC-tTAGTcTtAACAACAAAAGG	3	34601921	-	3	1
RNA	GCAATAGTATGAACAACAAANGG	GCt-TAGTcTtAACAACAAAAGG	3	34601921	-	3	1
RNA	GCAATAGTATGAACAACAAANGG	GC-ATAagATGAACAAgAAAAGG	3	44535427	+	3	1
RNA	GCAATAGTATGAACAACAAANGG	GCA-TAagATGAACAAgAAAAGG	3	44535427	+	3	1
RNA	GCAATAGTATGAACAACAAANGG	GCAgaAGTATGAACAgC-AAAGG	scaffold0865	4636	+	3	1
RNA	GCAATAGTATGAACAACAAANGG	GCAgaAGTATGAACAgCA-AAGG	scaffold0865	4636	+	3	1
RNA	GCAATAGTATGAACAACAAANGG	GaAATAGTATGAAaAAC-AtTGG	scaffold0567	7446	+	3	1
RNA	GCAATAGTATGAACAACAAANGG	GaAATAGTATGAAaAACA-tTGG	scaffold0567	7446	+	3	1
RNA	GCAATAGTATGAACAACAAANGG	GCAAaAGTATaAACAAg-AAAGG	scaffold0321	8600	+	3	1
RNA	GCAATAGTATGAACAACAAANGG	GCAAaAGTATaAACAAgA-AAGG	scaffold0321	8600	+	3	1
RNA	GCAATAGTATGAACAACAAANGG	GaAATAGTATGAAaAAC-AtGGG	scaffold0059	64388	-	3	1
RNA	GCAATAGTATGAACAACAAANGG	GaAATAGTATGAAaAACA-tGGG	scaffold0059	64388	-	3	1
RNA	GCAATAGTATGAACAACAAANGG	GaAATAGTATGAAaAAC-AtTGG	scaffold0038	109265	-	3	1
RNA	GCAATAGTATGAACAACAAANGG	GaAATAGTATGAAaAACA-tTGG	scaffold0038	109265	-	3	1
RNA	GCAATAGTATGAACAACAAANGG	GCAATAtaATGAAgAAC-AATGG	6	6761113	-	3	1
RNA	GCAATAGTATGAACAACAAANGG	GCAATAtaATGAAgAACA-ATGG	6	6761113	-	3	1
RNA	GCAATAGTATGAACAACAAANGG	GaAATAGTATGAAaAAC-AtTGG	6	16276600	+	3	1
RNA	GCAATAGTATGAACAACAAANGG	GaAATAGTATGAAaAACA-tTGG	6	16276600	+	3	1
RNA	GCAATAGTATGAACAACAAANGG	GaAATAGTATGAAaAAC-AtTGG	6	22827765	+	3	1
RNA	GCAATAGTATGAACAACAAANGG	GaAATAGTATGAAaAACA-tTGG	6	22827765	+	3	1
RNA	GCAATAGTATGAACAACAAANGG	GaAATAGTATGAAaAAC-AtTGG	6	28318159	-	3	1
RNA	GCAATAGTATGAACAACAAANGG	GaAATAGTATGAAaAACA-tTGG	6	28318159	-	3	1
RNA	GCAATAGTATGAACAACAAANGG	GCAATAGgATGAAaAAt-AAAGG	8	32731079	+	3	1
RNA	GCAATAGTATGAACAACAAANGG	GCAATAGgATGAAaAAtA-AAGG	8	32731079	+	3	1
RNA	GCAATAGTATGAACAACAAANGG	GCAATAGaATaAAgAAC-AATGG	8	39438417	-	3	1
RNA	GCAATAGTATGAACAACAAANGG	GCAATAGaATaAAgAACA-ATGG	8	39438417	-	3	1
RNA	GCAATAGTATGAACAACAAANGG	GCAAgAaTATGAACAAa-AAGGG	2	7650495	-	3	1
RNA	GCAATAGTATGAACAACAAANGG	GCAAgAaTATGAACAAaA-AGGG	2	7650495	-	3	1
RNA	GCAATAGTATGAACAACAAANGG	GaAATAGTATGAAaAAC-AtTGG	2	19043240	-	3	1
RNA	GCAATAGTATGAACAACAAANGG	GaAATAGTATGAAaAACA-tTGG	2	19043240	-	3	1
RNA	GCAATAGTATGAACAACAAANGG	GaAATAGTATGAAaAAC-AtTGG	2	39836616	+	3	1
RNA	GCAATAGTATGAACAACAAANGG	GaAATAGTATGAAaAACA-tTGG	2	39836616	+	3	1
RNA	GCAATAGTATGAACAACAAANGG	GCtATAGaATGAAaAAC-AATGG	7	4268200	-	3	1
RNA	GCAATAGTATGAACAACAAANGG	GCtATAGaATGAAaAACA-ATGG	7	4268200	-	3	1
RNA	GCAATAGTATGAACAACAAANGG	GgAATAGTATGAACAca-AATGG	7	21147910	-	3	1
RNA	GCAATAGTATGAACAACAAANGG	GgAATAGTATGAACAcaA-ATGG	7	21147910	-	3	1
RNA	GCAATAGTATGAACAACAAANGG	GCAAcAGcATcAACAAC-AATGG	1	12089294	+	3	1
RNA	GCAATAGTATGAACAACAAANGG	GCAAcAGcATcAACAACA-ATGG	1	12089294	+	3	1
RNA	GCAATAGTATGAACAACAAANGG	GCAAgAGaATGAAgAAC-AAAGG	1	26472725	-	3	1
RNA	GCAATAGTATGAACAACAAANGG	GCAAgAGaATGAAgAACA-AAGG	1	26472725	-	3	1
RNA	GCAATAGTATGAACAACAAANGG	GaAATAGTATGAAaAAC-AtTGG	1	29999261	+	3	1
RNA	GCAATAGTATGAACAACAAANGG	GaAATAGTATGAAaAACA-tTGG	1	29999261	+	3	1
RNA	GCAATAGTATGAACAACAAANGG	GaAATAGTATGAAaAAC-AtTGG	1	40949049	-	3	1
RNA	GCAATAGTATGAACAACAAANGG	GaAATAGTATGAAaAACA-tTGG	1	40949049	-	3	1
RNA	GCAATAGTATGAACAACAAANGG	GCAgaAGTATGAACAgC-AAAGG	3	6498634	+	3	1
RNA	GCAATAGTATGAACAACAAANGG	GCAgaAGTATGAACAgCA-AAGG	3	6498634	+	3	1
RNA	GCAATAGTATGAACAACAAANGG	GaAATAGTATGAAaAAC-AtTGG	3	20931118	+	3	1
RNA	GCAATAGTATGAACAACAAANGG	GaAATAGTATGAAaAACA-tTGG	3	20931118	+	3	1
RNA	GCAATAGTATGAACAACAAANGG	GaAATAGTATGAAaAAC-AtTGG	3	42397896	+	3	1
RNA	GCAATAGTATGAACAACAAANGG	GaAATAGTATGAAaAACA-tTGG	3	42397896	+	3	1
RNA	GCAATAGTATGAACAACAAANGG	GCAgcAGTATGAACAgC-AAAGG	4	4996086	+	3	1
RNA	GCAATAGTATGAACAACAAANGG	GCAgcAGTATGAACAgCA-AAGG	4	4996086	+	3	1
RNA	GCAATAGTATGAACAACAAANGG	GCAATAGT-TcAACtACAAtAGG	4	11004768	-	3	1
RNA	GCAATAGTATGAACAACAAANGG	GCAATAGc-cGAgCAACAAAAGG	4	16408433	-	3	1
RNA	GCAATAGTATGAACAACAAANGG	GgAATtGT-TGAACAAaAAATGG	4	36234708	-	3	1
RNA	GCAATAGTATGAACAACAAANGG	GCAtTAGT-TGAACAACtcATGG	4	37110314	-	3	1
RNA	GCAATAGTATGAACAACAAANGG	GtAAaA-TATGAACAAtAAAAGG	4	39924521	+	3	1
RNA	GCAATAGTATGAACAACAAANGG	tCAATg-TAaGAACAACAAAAGG	4	47793842	-	3	1
RNA	GCAATAGTATGAACAACAAANGG	tCAATA-TATtAACAAtAAATGG	4	52250362	+	3	1
RNA	GCAATAGTATGAACAACAAANGG	GtAcTAGTcT-AACAACAAATGG	4	15084972	-	3	1
RNA	GCAATAGTATGAACAACAAANGG	caAt-AGTATGAACAACAAAAGG	4	11016525	-	3	1
RNA	GCAATAGTATGAACAACAAANGG	GCAA-AGTtTGAACAAaAgATGG	4	25032861	+	3	1
RNA	GCAATAGTATGAACAACAAANGG	GtAA-AaTATGAACAAtAAAAGG	4	39924521	+	3	1
RNA	GCAATAGTATGAACAACAAANGG	tCAA-tGTAaGAACAACAAAAGG	4	47793842	-	3	1
RNA	GCAATAGTATGAACAACAAANGG	cCAAT-GTcTGAACAAgAAAAGG	4	21024693	+	3	1
RNA	GCAATAGTATGAACAACAAANGG	GCAAT-GTATGAACtAacAATGG	4	26022486	+	3	1
RNA	GCAATAGTATGAACAACAAANGG	GCAATAGcc-GAgCAACAAAAGG	4	16408433	-	3	1
RNA	GCAATAGTATGAACAACAAANGG	GCAAaAGgATGAA-AtCAAAAGG	4	13411980	+	3	1
RNA	GCAATAGTATGAACAACAAANGG	GCAATAaTATtAA-AAgAAATGG	4	28176588	+	3	1
RNA	GCAATAGTATGAACAACAAANGG	tCAATAcTATaAACAA-AAAGGG	4	32033493	+	3	1
RNA	GCAATAGTATGAACAACAAANGG	GCAATAGTATaAAgAA-AtACGG	4	47448991	-	3	1
RNA	GCAATAGTATGAACAACAAANGG	aCAATAGaAgGAACAA-AAATGG	4	54425275	+	3	1
RNA	GCAATAGTATGAACAACAAANGG	G-AATtGTATaAACAAtAAAAGG	4	13294552	+	3	1
RNA	GCAATAGTATGAACAACAAANGG	G-AATtGTATaAACAAtAAAAGG	4	13293183	+	3	1
RNA	GCAATAGTATGAACAACAAANGG	G-AATAGcATGAAaAAtAAATGG	4	27125181	+	3	1
RNA	GCAATAGTATGAACAACAAANGG	G-AAgAtTAgGAACAACAAAAGG	4	33397340	+	3	1
RNA	GCAATAGTATGAACAACAAANGG	GCAATAG-ccGAgCAACAAAAGG	4	16408433	-	3	1
RNA	GCAATAGTATGAACAACAAANGG	tCAATAG-AgGAACAACtAATGG	4	17507301	-	3	1
RNA	GCAATAGTATGAACAACAAANGG	GCAAgAG-ATGAACtAgAAAAGG	4	27335058	-	3	1
RNA	GCAATAGTATGAACAACAAANGG	GC-tTAGTcTtAACAACAAAAGG	4	49425426	-	3	1
RNA	GCAATAGTATGAACAACAAANGG	GCt-TAGTcTtAACAACAAAAGG	4	49425426	-	3	1
RNA	GCAATAGTATGAACAACAAANGG	cC-ATAGTATGAAggACAAAAGG	4	55964548	-	3	1
RNA	GCAATAGTATGAACAACAAANGG	cCA-TAGTATGAAggACAAAAGG	4	55964548	-	3	1
RNA	GCAATAGTATGAACAACAAANGG	GCAAgAGaATGAAgAAC-AAAGG	4	13206594	-	3	1
RNA	GCAATAGTATGAACAACAAANGG	GCAAgAGaATGAAgAACA-AAGG	4	13206594	-	3	1
DNA	GCAATAGTATGAACAACAA-ANGG	cCAATgGTgTGAACAACAACAAGG	6	20116556	+	3	1
DNA	GCAATAGTATGAACAACAA-ANGG	GCAATAGTATcAACAAtAtGAGGG	1	17223868	+	3	1
DNA	GCAATAGTATGAACAACAA-ANGG	GCAATAaaAaGAACAACAAGACGG	3	33091652	+	3	1
DNA	GCAATAGTATGAACAACA-AANGG	GCAATAGTAgGAAagACACAAAGG	2	31696043	+	3	1
DNA	GCAATAGTATGAACAACA-AANGG	GCAATAGTATcAACAAtATgAGGG	1	17223868	+	3	1
DNA	GCAATAGTATGAACAAC-AAANGG	GggATAGTATGAACAAtCAAAGGG	6	16446052	+	3	1
DNA	GCAATAGTATGAACAAC-AAANGG	tCAATAcTATGAACAAaTAAAGGG	2	4002512	+	3	1
DNA	GCAATAGTATGAACAAC-AAANGG	GgAATAGgATGAAtAACCAAAAGG	1	13841766	+	3	1
DNA	GCAATAGTATGAACAA-CAAANGG	GCcATAcTATGcACAAGCAAATGG	scaffold0108	36217	+	3	1
DNA	GCAATAGTATGAACAA-CAAANGG	GCcATAcTATGcACAAGCAAATGG	scaffold0064	33813	-	3	1
DNA	GCAATAGTATGAACAA-CAAANGG	GCcATAtTATGcACAAGCAAATGG	scaffold0051	73437	+	3	1
DNA	GCAATAGTATGAACAA-CAAANGG	GCcATAtTATGcACAAGCAAATGG	scaffold0040	34977	+	3	1
DNA	GCAATAGTATGAACAA-CAAANGG	tCAATAcTATGAACAAAtAAAGGG	2	4002512	+	3	1
DNA	GCAATAGTATGAACAA-CAAANGG	GCAATAtTATcAACAAACAAtAGG	2	42362818	+	3	1
DNA	GCAATAGTATGAACAA-CAAANGG	GgAATAGgATGAAtAACCAAAAGG	1	13841766	+	3	1
DNA	GCAATAGTATGAACA-ACAAANGG	GCAATAGaAaGAACtGACAAACGG	scaffold0069	50904	+	3	1
DNA	GCAATAGTATGAACA-ACAAANGG	GCAATAGaAaGAACtGACAAACGG	scaffold0012	118728	+	3	1
DNA	GCAATAGTATGAACA-ACAAANGG	GCAATAGaAaGAACtGACAAACGG	scaffold0006	208851	+	3	1
DNA	GCAATAGTATGAACA-ACAAANGG	GggATAGTATGAACAAtCAAAGGG	6	16446052	+	3	1
DNA	GCAATAGTATGAACA-ACAAANGG	GCAAgAGgAaGAACAGACAAAGGG	5	5258180	+	3	1
DNA	GCAATAGTATGAACA-ACAAANGG	GCAgTAGTAaGAgCAGACAAACGG	8	29634740	+	3	1
DNA	GCAATAGTATGAACA-ACAAANGG	tCAATAcTATGAACAAAtAAAGGG	2	4002512	+	3	1
DNA	GCAATAGTATGAACA-ACAAANGG	atAATAaTATGAACATACAAAGGG	2	4300552	+	3	1
DNA	GCAATAGTATGAACA-ACAAANGG	GCAATAtTATcAACAAACAAtAGG	2	42362818	+	3	1
DNA	GCAATAGTATGAACA-ACAAANGG	GCAATAGaAaGAACtGACAAACGG	1	13590016	+	3	1
DNA	GCAATAGTATGAACA-ACAAANGG	GCAATAGaAaGAACtGACAAACGG	1	20371750	+	3	1
DNA	GCAATAGTATGAACA-ACAAANGG	GCAATAGaAaGAACtGACAAACGG	1	20481008	+	3	1
DNA	GCAATAGTATGAAC-AACAAANGG	GCAATAGaAaGAACTgACAAACGG	scaffold0069	50904	+	3	1
DNA	GCAATAGTATGAAC-AACAAANGG	GCAATAGaAaGAACTgACAAACGG	scaffold0012	118728	+	3	1
DNA	GCAATAGTATGAAC-AACAAANGG	GCAATAGaAaGAACTgACAAACGG	scaffold0006	208851	+	3	1
DNA	GCAATAGTATGAAC-AACAAANGG	GggATAGTATGAACAAtCAAAGGG	6	16446052	+	3	1
DNA	GCAATAGTATGAAC-AACAAANGG	tCAATAcTATGAACAAAtAAAGGG	2	4002512	+	3	1
DNA	GCAATAGTATGAAC-AACAAANGG	GCAATAtTATcAACAAACAAtAGG	2	42362818	+	3	1
DNA	GCAATAGTATGAAC-AACAAANGG	GCAATAGaAaGAACTgACAAACGG	1	13590016	+	3	1
DNA	GCAATAGTATGAAC-AACAAANGG	GCAATAGaAaGAACTgACAAACGG	1	20371750	+	3	1
DNA	GCAATAGTATGAAC-AACAAANGG	GCAATAGaAaGAACTgACAAACGG	1	20481008	+	3	1
DNA	GCAATAGTATGAA-CAACAAANGG	GCAAaAaTAaGAAACAACAAAAGG	6	32549129	-	3	1
DNA	GCAATAGTATGAA-CAACAAANGG	GCAAgAGTATGAAACtAaAAAGGG	5	39833611	-	3	1
DNA	GCAATAGTATGA-ACAACAAANGG	GCAAaAaTAaGAAACAACAAAAGG	6	32549129	-	3	1
DNA	GCAATAGTATGA-ACAACAAANGG	GCAAgAGTATGAAACtAaAAAGGG	5	39833611	-	3	1
DNA	GCAATAGTATGA-ACAACAAANGG	GCAATAGTATtACACAgaAAAAGG	3	34243114	+	3	1
DNA	GCAATAGTATGA-ACAACAAANGG	GCAcTAtTATGAGAtAACAAAGGG	3	37452832	-	3	1
DNA	GCAATAGTATG-AACAACAAANGG	GCAAaAaTAaGAAACAACAAAAGG	6	32549129	-	3	1
DNA	GCAATAGTATG-AACAACAAANGG	cCAATAGTATaGAACAAgAAATGG	5	37627819	-	3	1
DNA	GCAATAGTATG-AACAACAAANGG	cCAATAGTATaGAACAAgAAATGG	5	37806942	-	3	1
DNA	GCAATAGTATG-AACAACAAANGG	GCAAgAGTATGAAACtAaAAAGGG	5	39833611	-	3	1
DNA	GCAATAGTATG-AACAACAAANGG	cCAATAGTATaGAACAAgAAATGG	8	7094570	-	3	1
DNA	GCAATAGTATG-AACAACAAANGG	cCAATAGTATaGAACAAgAAATGG	8	7098303	-	3	1
DNA	GCAATAGTATG-AACAACAAANGG	cCAATAGTATGTAACAttAAAAGG	8	29045396	+	3	1
DNA	GCAATAGTATG-AACAACAAANGG	cCAATAGTATaGAACAAgAAATGG	7	1609254	-	3	1
DNA	GCAATAGTATG-AACAACAAANGG	cCAATAGTATaGAACAAgAAATGG	7	19633345	-	3	1
DNA	GCAATAGTATG-AACAACAAANGG	cCAATAGTATaGAACAAgAAATGG	1	22362433	+	3	1
DNA	GCAATAGTATG-AACAACAAANGG	cCAATAGTATaGAACAAgAAATGG	1	41314684	-	3	1
DNA	GCAATAGTATG-AACAACAAANGG	cCAATAGTATaGAACAAgAAATGG	3	8377206	+	3	1
DNA	GCAATAGTATG-AACAACAAANGG	GCAATtGaATtTAACAACAAATGG	4	28016296	+	3	1
DNA	GCAATAGTAT-GAACAACAAANGG	tCAATAtTATAGAACAAgAAATGG	scaffold0627	3125	-	3	1
DNA	GCAATAGTAT-GAACAACAAANGG	GgAATAGTgTAGtACAACAAATGG	8	24029944	-	3	1
DNA	GCAATAGTAT-GAACAACAAANGG	GgAATAGTgTAGtACAACAAATGG	2	36591832	-	3	1
DNA	GCAATAGTAT-GAACAACAAANGG	cCAATAGTATAGAACAggAAATGG	7	2186771	+	3	1
DNA	GCAATAGTAT-GAACAACAAANGG	GgAATAGTgTAGtACAACAAATGG	1	34009209	-	3	1
DNA	GCAATAGTAT-GAACAACAAANGG	GtAATgGTATTGAACAgCAAATGG	1	42408889	-	3	1
DNA	GCAATAGTAT-GAACAACAAANGG	GCAAaAGTAaCGAACAACAtAGGG	1	46829525	-	3	1
DNA	GCAATAGTAT-GAACAACAAANGG	tCAAgAGTATAGAACAAaAAAAGG	3	26957355	-	3	1
DNA	GCAATAGTAT-GAACAACAAANGG	GCAATtGaATTtAACAACAAATGG	4	28016296	+	3	1
DNA	GCAATAGTA-TGAACAACAAANGG	cCAATAGTATaGAACAAgAAATGG	5	37627819	-	3	1
DNA	GCAATAGTA-TGAACAACAAANGG	cCAATAGTATaGAACAAgAAATGG	5	37806942	-	3	1
DNA	GCAATAGTA-TGAACAACAAANGG	cCAATAGTATaGAACAAgAAATGG	8	7098303	-	3	1
DNA	GCAATAGTA-TGAACAACAAANGG	cCAATAGTATaGAACAAgAAATGG	8	7094570	-	3	1
DNA	GCAATAGTA-TGAACAACAAANGG	cCAATAGTATaGAACAAgAAATGG	7	1609254	-	3	1
DNA	GCAATAGTA-TGAACAACAAANGG	cCAATAGTATaGAACAAgAAATGG	7	19633345	-	3	1
DNA	GCAATAGTA-TGAACAACAAANGG	GCAcTAGTtATGAAaAACAAAGGG	1	1633326	-	3	1
DNA	GCAATAGTA-TGAACAACAAANGG	GCAATAGTAGTaAAaAACcAAGGG	1	11838636	-	3	1
DNA	GCAATAGTA-TGAACAACAAANGG	cCAATAGTATaGAACAAgAAATGG	1	22362433	+	3	1
DNA	GCAATAGTA-TGAACAACAAANGG	cCAATAGTATaGAACAAgAAATGG	1	41314684	-	3	1
DNA	GCAATAGTA-TGAACAACAAANGG	GtAATgGTATTGAACAgCAAATGG	1	42408889	-	3	1
DNA	GCAATAGTA-TGAACAACAAANGG	GCAAaAGTAAcGAACAACAtAGGG	1	46829525	-	3	1
DNA	GCAATAGTA-TGAACAACAAANGG	cCAATAGTATaGAACAAgAAATGG	3	8377206	+	3	1
DNA	GCAATAGTA-TGAACAACAAANGG	GaAATttTAATGAACAACAAATGG	4	3178350	+	3	1
DNA	GCAATAGTA-TGAACAACAAANGG	GCAATtGaATTtAACAACAAATGG	4	28016296	+	3	1
DNA	GCAATAGT-ATGAACAACAAANGG	GgAAcAGTGATGAgCAACAAAGGG	6	21800835	+	3	1
DNA	GCAATAGT-ATGAACAACAAANGG	aaAATAGTTATGAAaAACAAATGG	5	34548457	-	3	1
DNA	GCAATAGT-ATGAACAACAAANGG	GCAATAtTTATGAtCAACgAAGGG	7	3200124	+	3	1
DNA	GCAATAGT-ATGAACAACAAANGG	GgAAcAGTGATGAgCAACAAAGGG	1	19073518	-	3	1
DNA	GCAATAGT-ATGAACAACAAANGG	GgAAcAGTGATGAgCAACAAAGGG	1	19121408	-	3	1
DNA	GCAATAGT-ATGAACAACAAANGG	GCAAaAGTAAcGAACAACAtAGGG	1	46829525	-	3	1
DNA	GCAATAGT-ATGAACAACAAANGG	GaAATttTAATGAACAACAAATGG	4	3178350	+	3	1
DNA	GCAATAG-TATGAACAACAAANGG	GggATAGGTATcAACAACAAAAGG	5	15919578	+	3	1
DNA	GCAATAG-TATGAACAACAAANGG	aaAATAGTTATGAAaAACAAATGG	5	34548457	-	3	1
DNA	GCAATAG-TATGAACAACAAANGG	GaAATAGGTtTGAACcACAAATGG	7	232623	+	3	1
DNA	GCAATAG-TATGAACAACAAANGG	GCAATAtTTATGAtCAACgAAGGG	7	3200124	+	3	1
DNA	GCAATA-GTATGAACAACAAANGG	GggATAGGTATcAACAACAAAAGG	5	15919578	+	3	1
DNA	GCAATA-GTATGAACAACAAANGG	GaAATAGGTtTGAACcACAAATGG	7	232623	+	3	1
DNA	GCAATA-GTATGAACAACAAANGG	GCAATATtTATGAtCAACgAAGGG	7	3200124	+	3	1
DNA	GCAATA-GTATGAACAACAAANGG	GCAcTAGtTATGAAaAACAAAGGG	1	1633326	-	3	1
DNA	GCAATA-GTATGAACAACAAANGG	GacATAAGTATGAACAgCAAAGGG	3	9991567	+	3	1
DNA	GCAAT-AGTATGAACAACAAANGG	GacATAAGTATGAACAgCAAAGGG	3	9991567	+	3	1
DNA	GCAAT-AGTATGAACAACAAANGG	GCAATGAGTtTtAtCAACAAAGGG	3	32074376	-	3	1
DNA	GCAAT-AGTATGAACAACAAANGG	aCAATCAGTATGcAaAACAAAAGG	4	29108064	+	3	1
DNA	GCAA-TAGTATGAACAACAAANGG	agcAATAGTATGAACAACAAAAGG	4	11016525	-	3	1
DNA	GCA-ATAGTATGAACAACAAANGG	cCATATAGTATGAAaAAgAAAAGG	scaffold0020	130711	+	3	1
DNA	GCA-ATAGTATGAACAACAAANGG	agcAATAGTATGAACAACAAAAGG	4	11016525	-	3	1
DNA	GC-AATAGTATGAACAACAAANGG	cCTAATAtcATGAACAACAAATGG	5	7391571	-	3	1
DNA	GC-AATAGTATGAACAACAAANGG	cCCAATAGTATcAACAtCAAAAGG	2	30396893	-	3	1
DNA	G-CAATAGTATGAACAACAAANGG	GGCAgaAGTATGAACAgCAAAGGG	scaffold0865	4635	+	3	1
DNA	G-CAATAGTATGAACAACAAANGG	GGCAATAaaATaAACAACAAAAGG	5	23920635	-	3	1
DNA	G-CAATAGTATGAACAACAAANGG	GTCgAaAGTATGAtCAACAAACGG	8	34232671	-	3	1
DNA	G-CAATAGTATGAACAACAAANGG	GGCAATAGcATcAgCAACAAAAGG	2	26513869	+	3	1
DNA	G-CAATAGTATGAACAACAAANGG	cCCAATAGTATcAACAtCAAAAGG	2	30396893	-	3	1
DNA	G-CAATAGTATGAACAACAAANGG	GACAATtGgATGAAgAACAAATGG	1	30207335	-	3	1
DNA	G-CAATAGTATGAACAACAAANGG	GGCAgaAGTATGAACAgCAAAGGG	3	6498633	+	3	1
DNA	G-CAATAGTATGAACAACAAANGG	GACAtaAGTATGAACAgCAAAGGG	3	9991567	+	3	1
DNA	G-CAATAGTATGAACAACAAANGG	GGCAgcAGTATGAACAgCAAAGGG	4	4996085	+	3	1
RNA	GCAATAGTATGAACAACAAANGG	GCcATctT-TGAAaAACAAAAGG	scaffold0524	76	+	4	1
RNA	GCAATAGTATGAACAACAAANGG	GtAcTAGT-ctAACAACAAATGG	scaffold0393	8317	+	4	1
RNA	GCAATAGTATGAACAACAAANGG	aCAATAtT-TcAACAAaAAATGG	scaffold0105	19825	+	4	1
RNA	GCAATAGTATGAACAACAAANGG	GaAAaAtT-TGAcCAACAAATGG	6	2481479	-	4	1
RNA	GCAATAGTATGAACAACAAANGG	GCAATAaT-TGAAaAAtgAAGGG	6	8744382	-	4	1
RNA	GCAATAGTATGAACAACAAANGG	GtgATgGT-gGAACAACAAAAGG	6	9990802	+	4	1
RNA	GCAATAGTATGAACAACAAANGG	GtgATgGT-gGAACAACAAAAGG	6	9997974	+	4	1
RNA	GCAATAGTATGAACAACAAANGG	cCAATAGa-aaAACAACAAATGG	6	15837157	+	4	1
RNA	GCAATAGTATGAACAACAAANGG	tCAAcAcT-TtAACAACAAAAGG	6	22573382	+	4	1
RNA	GCAATAGTATGAACAACAAANGG	GCtATAGT-TGAAaAACttAGGG	6	23585073	-	4	1
RNA	GCAATAGTATGAACAACAAANGG	GCAATAaT-TGttCAACcAATGG	6	26550033	-	4	1
RNA	GCAATAGTATGAACAACAAANGG	aCAATcaT-TGAACAAaAAAAGG	6	27702165	+	4	1
RNA	GCAATAGTATGAACAACAAANGG	GCAgaAGT-TGtACAAaAAAGGG	6	27965318	-	4	1
RNA	GCAATAGTATGAACAACAAANGG	aCAATAGa-TGAAgAAgAAATGG	6	30146930	-	4	1
RNA	GCAATAGTATGAACAACAAANGG	GaAATAGT-TGgAgAACAAcAGG	6	32590597	-	4	1
RNA	GCAATAGTATGAACAACAAANGG	GaAATAGT-TGgAgAACAAcAGG	6	32601068	-	4	1
RNA	GCAATAGTATGAACAACAAANGG	tCAAgtGT-TGAAtAACAAAAGG	6	34273445	+	4	1
RNA	GCAATAGTATGAACAACAAANGG	GCAcTAcT-TGtAtAACAAAAGG	6	34525373	+	4	1
RNA	GCAATAGTATGAACAACAAANGG	GCAATAaT-TGAtagACAAAGGG	5	1734889	-	4	1
RNA	GCAATAGTATGAACAACAAANGG	GaAAaAGT-TGAgCAAaAAATGG	5	2403327	+	4	1
RNA	GCAATAGTATGAACAACAAANGG	GgAATAGT-gGAACAtCAgATGG	5	3825538	-	4	1
RNA	GCAATAGTATGAACAACAAANGG	GCAAgAGg-cGAACAACAAtTGG	5	6938338	-	4	1
RNA	GCAATAGTATGAACAACAAANGG	GgAATAGT-aGAACAAtAAgAGG	5	8594067	+	4	1
RNA	GCAATAGTATGAACAACAAANGG	GCAAatGc-TGcACAACAAATGG	5	8918504	-	4	1
RNA	GCAATAGTATGAACAACAAANGG	tCAAcAGT-TcAACAcCAAAAGG	5	10391020	+	4	1
RNA	GCAATAGTATGAACAACAAANGG	GCAAgAGT-TtttCAACAAAAGG	5	11933397	+	4	1
RNA	GCAATAGTATGAACAACAAANGG	GCAATAcT-aGAttAACAAAAGG	5	16560117	-	4	1
RNA	GCAATAGTATGAACAACAAANGG	GttAaAGT-TGAACAAgAAAGGG	5	17631232	+	4	1
RNA	GCAATAGTATGAACAACAAANGG	GtAAaAtT-TGAAgAACAAAAGG	5	20847313	+	4	1
RNA	GCAATAGTATGAACAACAAANGG	GtAAaAtT-TGAAaAACAAAAGG	5	20853680	+	4	1
RNA	GCAATAGTATGAACAACAAANGG	aCcAgAGT-TcAACAACAAACGG	5	21636825	-	4	1
RNA	GCAATAGTATGAACAACAAANGG	GCAATAta-TGcACcACAAAGGG	5	22700503	+	4	1
RNA	GCAATAGTATGAACAACAAANGG	GtAAgAGT-TGAAgAAgAAATGG	5	24621758	+	4	1
RNA	GCAATAGTATGAACAACAAANGG	GCAATAtT-TGtACcAtAAAAGG	5	26525569	+	4	1
RNA	GCAATAGTATGAACAACAAANGG	GCAAaAaT-aGAAgAACAAATGG	5	33243887	-	4	1
RNA	GCAATAGTATGAACAACAAANGG	GtAAgAGT-TGAAgAAgAAATGG	5	36495162	-	4	1
RNA	GCAATAGTATGAACAACAAANGG	aCAtaAGT-TGtACAACAAACGG	5	36923924	+	4	1
RNA	GCAATAGTATGAACAACAAANGG	GCAATAcT-TGAACAAgAtcTGG	5	41548417	+	4	1
RNA	GCAATAGTATGAACAACAAANGG	GCAAgAaT-TGAAgAACAcACGG	5	43245425	+	4	1
RNA	GCAATAGTATGAACAACAAANGG	GCAgaAGT-TGAAagACAAATGG	8	6183543	-	4	1
RNA	GCAATAGTATGAACAACAAANGG	GgAATgGa-TGAtCAACAAAGGG	8	7157528	-	4	1
RNA	GCAATAGTATGAACAACAAANGG	GCAcTAGT-TaAACAAtcAATGG	8	9451739	+	4	1
RNA	GCAATAGTATGAACAACAAANGG	tCAATAGT-TGAAgAAtgAAAGG	8	13450185	+	4	1
RNA	GCAATAGTATGAACAACAAANGG	tCAcaAGT-TGAACAAgAAAAGG	8	21127208	-	4	1
RNA	GCAATAGTATGAACAACAAANGG	GCAAaAaa-TGAACAAgAAACGG	8	29479233	-	4	1
RNA	GCAATAGTATGAACAACAAANGG	GCAATAtT-TGAAacACAcAAGG	8	35126108	-	4	1
RNA	GCAATAGTATGAACAACAAANGG	GCAATAca-TtAACAACAcATGG	8	37515163	+	4	1
RNA	GCAATAGTATGAACAACAAANGG	GCAATgGT-gGAACAAgAAgTGG	8	38196732	+	4	1
RNA	GCAATAGTATGAACAACAAANGG	GCAtTAGT-TGAAtcAgAAATGG	8	37920417	-	4	1
RNA	GCAATAGTATGAACAACAAANGG	cCtATAcT-TGAACAAaAAAAGG	8	41266582	-	4	1
RNA	GCAATAGTATGAACAACAAANGG	GCAcTAcT-TGgACAAtAAAGGG	2	7833505	+	4	1
RNA	GCAATAGTATGAACAACAAANGG	cCAAatGT-aGAACAACAAAGGG	2	8508310	-	4	1
RNA	GCAATAGTATGAACAACAAANGG	GCAgTAGT-gGAAaAAgAAAAGG	2	13110978	+	4	1
RNA	GCAATAGTATGAACAACAAANGG	aaAATAtT-TGAcCAACAAAAGG	2	13510123	-	4	1
RNA	GCAATAGTATGAACAACAAANGG	aCAATAGg-TGAAaAAaAAAAGG	2	19473437	+	4	1
RNA	GCAATAGTATGAACAACAAANGG	taAgTAaT-TGAACAACAAATGG	2	25788288	-	4	1
RNA	GCAATAGTATGAACAACAAANGG	GCAAcAtT-TGgAaAACAAATGG	2	26525027	-	4	1
RNA	GCAATAGTATGAACAACAAANGG	GtAATAcT-TGAAtAAaAAATGG	2	28847530	+	4	1
RNA	GCAATAGTATGAACAACAAANGG	GCAAaAGT-aGAAaAAaAAAAGG	2	30351072	-	4	1
RNA	GCAATAGTATGAACAACAAANGG	GCAATAta-TGcACcACAAAGGG	2	33238353	-	4	1
RNA	GCAATAGTATGAACAACAAANGG	GCAATAta-TGcACcACAAAGGG	2	33246274	-	4	1
RNA	GCAATAGTATGAACAACAAANGG	GaAATAGT-TcAACtgCAAAAGG	2	36027509	+	4	1
RNA	GCAATAGTATGAACAACAAANGG	GCAATAGc-aGAgCAACAcAGGG	2	41470373	+	4	1
RNA	GCAATAGTATGAACAACAAANGG	tCtATAaT-TtAACAACAAAAGG	7	350799	-	4	1
RNA	GCAATAGTATGAACAACAAANGG	tCAcTAGT-TcAACAACAcATGG	7	6590320	-	4	1
RNA	GCAATAGTATGAACAACAAANGG	aCAAaAGT-TGAAgcACAAATGG	7	7340946	+	4	1
RNA	GCAATAGTATGAACAACAAANGG	tCAATAGT-TGAAtAAtAAgAGG	7	8167473	-	4	1
RNA	GCAATAGTATGAACAACAAANGG	tCAATAtT-TGAAtAtCAAACGG	7	8829558	-	4	1
RNA	GCAATAGTATGAACAACAAANGG	GaAAaAGa-TaAACAACAAAAGG	7	11721831	+	4	1
RNA	GCAATAGTATGAACAACAAANGG	agAATgGT-TGAAaAACAAAAGG	7	13432843	+	4	1
RNA	GCAATAGTATGAACAACAAANGG	GgAAgAGT-gGAAaAACAAAGGG	7	23026173	+	4	1
RNA	GCAATAGTATGAACAACAAANGG	GgAAgAGT-gGAAaAACAAAGGG	7	23034981	+	4	1
RNA	GCAATAGTATGAACAACAAANGG	aCtATAGT-TGAAgAAaAAAAGG	7	32809793	-	4	1
RNA	GCAATAGTATGAACAACAAANGG	GCcATAtT-TGtACAAtAAATGG	7	37838029	-	4	1
RNA	GCAATAGTATGAACAACAAANGG	tCAgTAGT-TGAAgAACAcAGGG	7	41813860	-	4	1
RNA	GCAATAGTATGAACAACAAANGG	GgAATAcT-TGttCAACAAAAGG	7	42862411	-	4	1
RNA	GCAATAGTATGAACAACAAANGG	GCAATAGT-TtgACAAaAcACGG	1	1311502	+	4	1
RNA	GCAATAGTATGAACAACAAANGG	GCcATgtT-TGAACAACAcATGG	1	3442852	+	4	1
RNA	GCAATAGTATGAACAACAAANGG	GCcATgtT-TGAACAACAcATGG	1	3403944	-	4	1
RNA	GCAATAGTATGAACAACAAANGG	GtAAgAGT-TGAAgAAgAAATGG	1	3919911	-	4	1
RNA	GCAATAGTATGAACAACAAANGG	GCAATccg-gGAACAACAAAAGG	1	4944319	-	4	1
RNA	GCAATAGTATGAACAACAAANGG	GCAtTgGT-cGAACAACAAgTGG	1	6697565	-	4	1
RNA	GCAATAGTATGAACAACAAANGG	aCAATAGT-TGAAgAggAAAGGG	1	9936807	-	4	1
RNA	GCAATAGTATGAACAACAAANGG	GaAATtGa-TGAAgAACAAAAGG	1	12900177	+	4	1
RNA	GCAATAGTATGAACAACAAANGG	GCAcTAcT-TGtAaAACAAAAGG	1	18004318	+	4	1
RNA	GCAATAGTATGAACAACAAANGG	GaAATAGa-TGAACAAtgAAAGG	1	32516405	+	4	1
RNA	GCAATAGTATGAACAACAAANGG	tgAATAtT-TGAcCAACAAAGGG	1	32709544	+	4	1
RNA	GCAATAGTATGAACAACAAANGG	ctgATAaT-TGAACAACAAAAGG	1	33612176	+	4	1
RNA	GCAATAGTATGAACAACAAANGG	GCAATAta-TGcACcACAAAGGG	1	33467362	-	4	1
RNA	GCAATAGTATGAACAACAAANGG	GCAATAta-TGcACcACAAAGGG	1	33477414	-	4	1
RNA	GCAATAGTATGAACAACAAANGG	GaAATAGT-TGgAgAACAAcAGG	1	34594116	-	4	1
RNA	GCAATAGTATGAACAACAAANGG	GCAATAta-TGcACcACAAAGGG	1	34506552	-	4	1
RNA	GCAATAGTATGAACAACAAANGG	aaAATAcT-TGAACAAaAAAAGG	1	36404624	-	4	1
RNA	GCAATAGTATGAACAACAAANGG	GaAAaAtT-TGAcCAACAAATGG	1	44680935	+	4	1
RNA	GCAATAGTATGAACAACAAANGG	GaAATAGT-TGcACAAaAAtTGG	1	45086910	+	4	1
RNA	GCAATAGTATGAACAACAAANGG	GCAcTAGT-TtttCAACAAAAGG	1	46232443	-	4	1
RNA	GCAATAGTATGAACAACAAANGG	GaAATAGT-TtAtCAACtAAAGG	1	49650985	+	4	1
RNA	GCAATAGTATGAACAACAAANGG	GtAAgAGT-TGAAgAAgAAATGG	1	52509082	-	4	1
RNA	GCAATAGTATGAACAACAAANGG	tCcAaAcT-TGAACAACAAAAGG	3	19771319	+	4	1
RNA	GCAATAGTATGAACAACAAANGG	GCAATtGg-TGAACttCAAAGGG	3	19715787	-	4	1
RNA	GCAATAGTATGAACAACAAANGG	GCcATAGT-TGAtCAcCAAtTGG	3	25878720	-	4	1
RNA	GCAATAGTATGAACAACAAANGG	tCAATAcT-TGAAaAAaAAACGG	3	27886595	-	4	1
RNA	GCAATAGTATGAACAACAAANGG	aCAATAaT-TtAAaAACAAAAGG	3	27938573	-	4	1
RNA	GCAATAGTATGAACAACAAANGG	GttAaAGT-TGAACAAgAAAGGG	3	32019032	-	4	1
RNA	GCAATAGTATGAACAACAAANGG	caAATAtT-TGAACAAaAAATGG	3	34453231	-	4	1
RNA	GCAATAGTATGAACAACAAANGG	GgAATAGT-TGtACAgaAAAAGG	3	36724878	-	4	1
RNA	GCAATAGTATGAACAACAAANGG	aCAAgAGT-TGAAgAtCAAAGGG	3	41314446	-	4	1
RNA	GCAATAGTATGAACAACAAANGG	GCcATAcT-TGAACtgCAAAAGG	3	43067531	+	4	1
RNA	GCAATAGTATGAACAACAAANGG	GCAATcGT-gGAAgAACAAgCGG	3	43179608	-	4	1
RNA	GCAATAGTATGAACAACAAANGG	GCAATcGT-gGAAgAACAAgCGG	3	43186774	-	4	1
RNA	GCAATAGTATGAACAACAAANGG	GCAtaAGa-TGAACAAgAAAAGG	3	44535427	+	4	1
RNA	GCAATAGTATGAACAACAAANGG	agAAaAGT-TGAACAACAAcGGG	3	46104127	+	4	1
RNA	GCAATAGTATGAACAACAAANGG	GaAATcGT-TGAACAAtAtAGGG	3	46338676	-	4	1
RNA	GCAATAGTATGAACAACAAANGG	GCcAaAcT-TGgACAACAAAAGG	3	49498705	-	4	1
RNA	GCAATAGTATGAACAACAAANGG	GCAATtcT-ctAACAACAAAGGG	3	54788126	-	4	1
RNA	GCAATAGTATGAACAACAAANGG	GgAATctT-TGAACgACAAAGGG	3	55359540	-	4	1
RNA	GCAATAGTATGAACAACAAANGG	GCAATAtT-TGcACAAgcAACGG	4	1511066	+	4	1
RNA	GCAATAGTATGAACAACAAANGG	GCAAcAaT-TGAAaAAaAAATGG	4	2567463	-	4	1
RNA	GCAATAGTATGAACAACAAANGG	aCAATAaT-TGAAaAAtAAACGG	4	5401737	-	4	1
RNA	GCAATAGTATGAACAACAAANGG	GCAccAGT-cGAACAAgAAATGG	4	6759410	+	4	1
RNA	GCAATAGTATGAACAACAAANGG	GCAAgAGT-TGgAaAACcAAGGG	4	7065020	-	4	1
RNA	GCAATAGTATGAACAACAAANGG	aCAATAtT-TcAACAAaAAATGG	4	8193169	+	4	1
RNA	GCAATAGTATGAACAACAAANGG	aCAATA-TAacAACAtCAAATGG	scaffold0716	4853	+	4	1
RNA	GCAATAGTATGAACAACAAANGG	GaAATA-TATtAACAACAttCGG	scaffold0592	3445	-	4	1
RNA	GCAATAGTATGAACAACAAANGG	GCcATc-TtTGAAaAACAAAAGG	scaffold0524	76	+	4	1
RNA	GCAATAGTATGAACAACAAANGG	aCAATA-TAacAACAtCAAATGG	scaffold0494	12229	-	4	1
RNA	GCAATAGTATGAACAACAAANGG	aCAATA-TAacAACAtCAAATGG	scaffold0454	10932	+	4	1
RNA	GCAATAGTATGAACAACAAANGG	aCAATA-TAacAACAtCAAATGG	scaffold0363	9401	+	4	1
RNA	GCAATAGTATGAACAACAAANGG	GaAATA-TATGcACAACAtgTGG	scaffold0204	29604	-	4	1
RNA	GCAATAGTATGAACAACAAANGG	taAATA-TAaGAAgAACAAAAGG	scaffold0174	33583	+	4	1
RNA	GCAATAGTATGAACAACAAANGG	aCAATA-TtTcAACAAaAAATGG	scaffold0105	19825	+	4	1
RNA	GCAATAGTATGAACAACAAANGG	GtAAcA-TAgaAACAACAAAGGG	scaffold0040	49431	-	4	1
RNA	GCAATAGTATGAACAACAAANGG	tCAATA-TAgGAAgAACAAgTGG	scaffold0012	245126	+	4	1
RNA	GCAATAGTATGAACAACAAANGG	agAATg-TcTGAACAACAAAAGG	scaffold0001	393226	+	4	1
RNA	GCAATAGTATGAACAACAAANGG	GCAATA-aAaGtAaAACAAATGG	6	1330509	-	4	1
RNA	GCAATAGTATGAACAACAAANGG	GaAAaA-TtTGAcCAACAAATGG	6	2481479	-	4	1
RNA	GCAATAGTATGAACAACAAANGG	GaAATA-TATGcACAACAtgTGG	6	4313844	-	4	1
RNA	GCAATAGTATGAACAACAAANGG	aCAATA-TATGAAaAgaAAAAGG	6	7591507	+	4	1
RNA	GCAATAGTATGAACAACAAANGG	GaAATA-TATGcACAACAtgTGG	6	13611315	-	4	1
RNA	GCAATAGTATGAACAACAAANGG	cCAATA-gAaaAACAACAAATGG	6	15837157	+	4	1
RNA	GCAATAGTATGAACAACAAANGG	agAATA-TATGAACAAtAAtCGG	6	24332314	+	4	1
RNA	GCAATAGTATGAACAACAAANGG	aCAATA-TAaaAACAtCAAATGG	6	25656788	+	4	1
RNA	GCAATAGTATGAACAACAAANGG	aCAATA-TAacAACAcCAAATGG	6	25688661	+	4	1
RNA	GCAATAGTATGAACAACAAANGG	aCAATc-atTGAACAACAAAAGG	6	27599520	+	4	1
RNA	GCAATAGTATGAACAACAAANGG	aCAATA-TATtAACAAaAcAGGG	6	28676844	-	4	1
RNA	GCAATAGTATGAACAACAAANGG	cCAAaA-TATtAACAAaAAATGG	6	28980072	-	4	1
RNA	GCAATAGTATGAACAACAAANGG	cCAATc-TATGgACAAgAAAAGG	6	30529856	+	4	1
RNA	GCAATAGTATGAACAACAAANGG	aCAATA-gATGAAgAAgAAATGG	6	30146930	-	4	1
RNA	GCAATAGTATGAACAACAAANGG	aCAATA-TAacAACAtCAAATGG	6	30676690	-	4	1
RNA	GCAATAGTATGAACAACAAANGG	GCAATA-cAcaAACAAaAAAAGG	6	32617080	-	4	1
RNA	GCAATAGTATGAACAACAAANGG	aCAATA-TAacAACAtCAAATGG	6	34963532	+	4	1
RNA	GCAATAGTATGAACAACAAANGG	taAATA-TAaGAACtACAAAAGG	5	630893	-	4	1
RNA	GCAATAGTATGAACAACAAANGG	GCAATA-TATGcAtAtgAAATGG	5	1411232	-	4	1
RNA	GCAATAGTATGAACAACAAANGG	GCAAcc-aATGAACAAtAAAAGG	5	3765550	+	4	1
RNA	GCAATAGTATGAACAACAAANGG	GCAtTA-TAaaAACAAaAAAAGG	5	4952987	-	4	1
RNA	GCAATAGTATGAACAACAAANGG	GaAATA-TATGcACAACAtgTGG	5	6115749	+	4	1
RNA	GCAATAGTATGAACAACAAANGG	tCAAaA-TATGAACAACAtgAGG	5	6472200	-	4	1
RNA	GCAATAGTATGAACAACAAANGG	GCAAaA-TATaAAaAAtAAAGGG	5	12461626	-	4	1
RNA	GCAATAGTATGAACAACAAANGG	tCAAaA-TATGAAaAACAcATGG	5	13120040	-	4	1
RNA	GCAATAGTATGAACAACAAANGG	GCtATg-aATGAACAACtAAAGG	5	13744863	+	4	1
RNA	GCAATAGTATGAACAACAAANGG	GCAcTA-TATGAAgAAgAtATGG	5	14744371	+	4	1
RNA	GCAATAGTATGAACAACAAANGG	GCAATt-TcTGAAgAAaAAATGG	5	18462612	-	4	1
RNA	GCAATAGTATGAACAACAAANGG	GCAAaA-aATaAACAACAgAAGG	5	19695858	+	4	1
RNA	GCAATAGTATGAACAACAAANGG	GCAATA-TgTtAAggACAAAAGG	5	19949987	-	4	1
RNA	GCAATAGTATGAACAACAAANGG	GCAAcA-TATGcACcACAcAGGG	5	19988100	-	4	1
RNA	GCAATAGTATGAACAACAAANGG	GtAAaA-TtTGAAaAACAAAAGG	5	20853680	+	4	1
RNA	GCAATAGTATGAACAACAAANGG	GtAAaA-TtTGAAgAACAAAAGG	5	20847313	+	4	1
RNA	GCAATAGTATGAACAACAAANGG	GCAATA-TtTGtACcAtAAAAGG	5	26525569	+	4	1
RNA	GCAATAGTATGAACAACAAANGG	GaAAgA-TATGAACAtCAAgAGG	5	27689935	+	4	1
RNA	GCAATAGTATGAACAACAAANGG	GaAAgA-TATGAACAtCAAgAGG	5	27486319	-	4	1
RNA	GCAATAGTATGAACAACAAANGG	aCcATA-aATGAAaAACAAAAGG	5	33143678	+	4	1
RNA	GCAATAGTATGAACAACAAANGG	GaAATg-TATGAAaAAaAAAGGG	5	33978262	+	4	1
RNA	GCAATAGTATGAACAACAAANGG	GaAATA-TcTtAACAtCAAAAGG	5	42157725	+	4	1
RNA	GCAATAGTATGAACAACAAANGG	GgAAaA-TATGtACAAaAAAGGG	8	4032782	-	4	1
RNA	GCAATAGTATGAACAACAAANGG	tCAAaA-TATGAAgAcCAAAAGG	8	4255301	-	4	1
RNA	GCAATAGTATGAACAACAAANGG	aCAAaA-aATGAACcACAAAAGG	8	5093053	-	4	1
RNA	GCAATAGTATGAACAACAAANGG	aaAAaA-TATGAACAAaAAAAGG	8	5246709	-	4	1
RNA	GCAATAGTATGAACAACAAANGG	GtAATc-TATGcACAgCAAATGG	8	5387156	-	4	1
RNA	GCAATAGTATGAACAACAAANGG	GgAATg-gATGAtCAACAAAGGG	8	7157528	-	4	1
RNA	GCAATAGTATGAACAACAAANGG	GCtATA-ctTGcACAACAAATGG	8	8008616	+	4	1
RNA	GCAATAGTATGAACAACAAANGG	GCAATt-cATGAAaAACAAgTGG	8	10590418	-	4	1
RNA	GCAATAGTATGAACAACAAANGG	GCAATA-aATcAAgAgCAAAGGG	8	13983226	-	4	1
RNA	GCAATAGTATGAACAACAAANGG	aCAATA-TAacAACAtCAAATGG	8	16413296	-	4	1
RNA	GCAATAGTATGAACAACAAANGG	GCtAgA-TATGtACAAaAAAGGG	8	22607768	-	4	1
RNA	GCAATAGTATGAACAACAAANGG	tCAATt-TAaGAACAAgAAAGGG	8	27349927	-	4	1
RNA	GCAATAGTATGAACAACAAANGG	GCAATA-TtTGAAacACAcAAGG	8	35126108	-	4	1
RNA	GCAATAGTATGAACAACAAANGG	GCAATA-TATGAcCAAaAttTGG	8	36430195	+	4	1
RNA	GCAATAGTATGAACAACAAANGG	tCAATA-TATGAgCAtaAAAGGG	8	36917677	+	4	1
RNA	GCAATAGTATGAACAACAAANGG	tCAgTA-TATGAACAgCAtATGG	8	40080372	-	4	1
RNA	GCAATAGTATGAACAACAAANGG	GaAATA-TATGcACAACAttTGG	2	40555	+	4	1
RNA	GCAATAGTATGAACAACAAANGG	GaAATA-TATGcACAACAtgTGG	2	861274	-	4	1
RNA	GCAATAGTATGAACAACAAANGG	GCcAct-TATGAACAAaAAACGG	2	5245773	-	4	1
RNA	GCAATAGTATGAACAACAAANGG	tCAATc-TAgaAACAACAAACGG	2	7618010	-	4	1
RNA	GCAATAGTATGAACAACAAANGG	GCAgTA-TAcGAACAAgAgAAGG	2	9149491	+	4	1
RNA	GCAATAGTATGAACAACAAANGG	GgtAgA-TATtAACAACAAATGG	2	10092231	+	4	1
RNA	GCAATAGTATGAACAACAAANGG	tCAAaA-TATGcACAAtAAAAGG	2	10861519	-	4	1
RNA	GCAATAGTATGAACAACAAANGG	GCAtTg-TATGgACcACAAACGG	2	12456119	+	4	1
RNA	GCAATAGTATGAACAACAAANGG	aaAATA-TtTGAcCAACAAAAGG	2	13510123	-	4	1
RNA	GCAATAGTATGAACAACAAANGG	cCtATA-TcTaAACAACAAAAGG	2	21465815	-	4	1
RNA	GCAATAGTATGAACAACAAANGG	GCAAcA-TtTGgAaAACAAATGG	2	26525027	-	4	1
RNA	GCAATAGTATGAACAACAAANGG	GaAATc-aATGcACAACAAATGG	2	27659108	+	4	1
RNA	GCAATAGTATGAACAACAAANGG	tCAATg-TATGAACcACAcAAGG	2	29827039	-	4	1
RNA	GCAATAGTATGAACAACAAANGG	aCAATA-TAacAACAtCAAATGG	2	32214901	-	4	1
RNA	GCAATAGTATGAACAACAAANGG	tttATA-TATGAACAAaAAAAGG	2	33213347	+	4	1
RNA	GCAATAGTATGAACAACAAANGG	tCAATt-gtTGAACAACAAAAGG	2	35797398	+	4	1
RNA	GCAATAGTATGAACAACAAANGG	GCAAaA-TATGAtCAAatAAAGG	2	44936003	+	4	1
RNA	GCAATAGTATGAACAACAAANGG	GaAATA-TATGcACAACAtgTGG	7	57485	+	4	1
RNA	GCAATAGTATGAACAACAAANGG	GaAAgA-TATGAACAcCAAgAGG	7	6056151	+	4	1
RNA	GCAATAGTATGAACAACAAANGG	GaAATA-cATGAACtACAAgAGG	7	7399488	+	4	1
RNA	GCAATAGTATGAACAACAAANGG	tCAATA-TtTGAAtAtCAAACGG	7	8829558	-	4	1
RNA	GCAATAGTATGAACAACAAANGG	GaAAaA-gATaAACAACAAAAGG	7	11721831	+	4	1
RNA	GCAATAGTATGAACAACAAANGG	GgAATt-TAgGAACAgCAAATGG	7	11754876	+	4	1
RNA	GCAATAGTATGAACAACAAANGG	aCcATA-TATGcACAACAtAGGG	7	18252506	+	4	1
RNA	GCAATAGTATGAACAACAAANGG	GCAAcA-TcTGcACcACAAAGGG	7	22652042	-	4	1
RNA	GCAATAGTATGAACAACAAANGG	GaAATA-TATGcACAACAtgTGG	7	23963458	+	4	1
RNA	GCAATAGTATGAACAACAAANGG	GCAtTt-TATcAACAtCAAAAGG	7	35386431	-	4	1
RNA	GCAATAGTATGAACAACAAANGG	aCAATA-aAcGAACcACAAATGG	7	36727791	+	4	1
RNA	GCAATAGTATGAACAACAAANGG	GaAAaA-TATGgAgAACAAACGG	7	37679746	-	4	1
RNA	GCAATAGTATGAACAACAAANGG	GCcATA-TtTGtACAAtAAATGG	7	37838029	-	4	1
RNA	GCAATAGTATGAACAACAAANGG	GaAATA-TATGcACAAtAtATGG	7	43423209	-	4	1
RNA	GCAATAGTATGAACAACAAANGG	aCAATt-TATGAAgAAaAAATGG	7	43451518	-	4	1
RNA	GCAATAGTATGAACAACAAANGG	aCAATA-TAaGAAatACAAACGG	7	43472223	-	4	1
RNA	GCAATAGTATGAACAACAAANGG	GCtATA-aATcAACAAaAAAAGG	7	43669981	-	4	1
RNA	GCAATAGTATGAACAACAAANGG	GCAgTt-TgTGAAgAACAAAAGG	1	1421867	+	4	1
RNA	GCAATAGTATGAACAACAAANGG	tCAAgA-TATaAACcACAAAAGG	1	2131730	-	4	1
RNA	GCAATAGTATGAACAACAAANGG	GCcATg-TtTGAACAACAcATGG	1	3442852	+	4	1
RNA	GCAATAGTATGAACAACAAANGG	GCcATg-TtTGAACAACAcATGG	1	3403944	-	4	1
RNA	GCAATAGTATGAACAACAAANGG	GCAcaA-TATcAACAACAAcAGG	1	3888652	-	4	1
RNA	GCAATAGTATGAACAACAAANGG	GCAATc-cggGAACAACAAAAGG	1	4944319	-	4	1
RNA	GCAATAGTATGAACAACAAANGG	GCAATg-TcTGAAgAAgAAAAGG	1	7540221	-	4	1
RNA	GCAATAGTATGAACAACAAANGG	GaAATt-gATGAAgAACAAAAGG	1	12900177	+	4	1
RNA	GCAATAGTATGAACAACAAANGG	GaAATA-TATGAAagACcAATGG	1	16645159	+	4	1
RNA	GCAATAGTATGAACAACAAANGG	ttAATA-TAgGAAtAACAAATGG	1	20767680	-	4	1
RNA	GCAATAGTATGAACAACAAANGG	aCAATA-TAacAACAtCAAATGG	1	21840926	+	4	1
RNA	GCAATAGTATGAACAACAAANGG	aCAATA-TAaGtACAAtAAATGG	1	23722031	-	4	1
RNA	GCAATAGTATGAACAACAAANGG	GgAtTA-cATGAgCAACAAAGGG	1	27983864	+	4	1
RNA	GCAATAGTATGAACAACAAANGG	cCAAaA-TATaAACAAaAAATGG	1	29846717	-	4	1
RNA	GCAATAGTATGAACAACAAANGG	GaAATA-gATGAACAAtgAAAGG	1	32516405	+	4	1
RNA	GCAATAGTATGAACAACAAANGG	tgAATA-TtTGAcCAACAAAGGG	1	32709544	+	4	1
RNA	GCAATAGTATGAACAACAAANGG	tCcAgA-TATGAAgAACAAATGG	1	35732553	+	4	1
RNA	GCAATAGTATGAACAACAAANGG	GaAATA-TATaAAaAAaAAAAGG	1	36980913	-	4	1
RNA	GCAATAGTATGAACAACAAANGG	GCAAaA-TAgaAAaAACAAAAGG	1	39312223	-	4	1
RNA	GCAATAGTATGAACAACAAANGG	GCAATA-TcTGAAgAAgtAATGG	1	41185284	-	4	1
RNA	GCAATAGTATGAACAACAAANGG	aCAATA-TATcAtCAACAcAAGG	1	42977812	+	4	1
RNA	GCAATAGTATGAACAACAAANGG	aCAATA-TATcAACAACAcgAGG	1	42970863	-	4	1
RNA	GCAATAGTATGAACAACAAANGG	GaAAaA-TtTGAcCAACAAATGG	1	44680935	+	4	1
RNA	GCAATAGTATGAACAACAAANGG	GaAATA-TATGcACAACAttTGG	1	47268366	-	4	1
RNA	GCAATAGTATGAACAACAAANGG	GtAtcA-TATGAACAAtAAAAGG	1	48138378	+	4	1
RNA	GCAATAGTATGAACAACAAANGG	GCAAcA-TcTGcACcACAAAGGG	1	49063677	-	4	1
RNA	GCAATAGTATGAACAACAAANGG	caAAaA-TATGAACAAaAAACGG	1	50691238	-	4	1
RNA	GCAATAGTATGAACAACAAANGG	caAATA-TATGgACAAgAAATGG	1	52774956	+	4	1
RNA	GCAATAGTATGAACAACAAANGG	GCAtTA-aATtAACAAaAAATGG	3	2199526	+	4	1
RNA	GCAATAGTATGAACAACAAANGG	GaAAaA-TAgGAACAAtAAAAGG	3	2891719	+	4	1
RNA	GCAATAGTATGAACAACAAANGG	tCAAgA-TATGAACAAaAAgGGG	3	8254691	+	4	1
RNA	GCAATAGTATGAACAACAAANGG	GCttTA-cATGAACAtCAAATGG	3	8387467	+	4	1
RNA	GCAATAGTATGAACAACAAANGG	GCAcTt-TATtAACAACAcATGG	3	14441003	+	4	1
RNA	GCAATAGTATGAACAACAAANGG	cCAAaA-TATGcACAtCAAAGGG	3	16941708	+	4	1
RNA	GCAATAGTATGAACAACAAANGG	GtgATA-TATaAACAgCAAAAGG	3	28429644	-	4	1
RNA	GCAATAGTATGAACAACAAANGG	GtAAcA-TATGcACcACAAAGGG	3	30496491	+	4	1
RNA	GCAATAGTATGAACAACAAANGG	GCAAcA-TATGcgCcACAAAGGG	3	30536875	+	4	1
RNA	GCAATAGTATGAACAACAAANGG	GCAAgA-TATGcACgACAAcGGG	3	30495952	-	4	1
RNA	GCAATAGTATGAACAACAAANGG	agAAcA-aATGAACAACAAAAGG	3	31982673	+	4	1
RNA	GCAATAGTATGAACAACAAANGG	caAATA-TtTGAACAAaAAATGG	3	34453231	-	4	1
RNA	GCAATAGTATGAACAACAAANGG	GaAAat-TATGAAaAACAAAGGG	3	36143912	-	4	1
RNA	GCAATAGTATGAACAACAAANGG	tCAAcA-cAaGAACAACAAATGG	3	38995528	+	4	1
RNA	GCAATAGTATGAACAACAAANGG	GCcAaA-TATGAACAtCAAcAGG	3	40106894	+	4	1
RNA	GCAATAGTATGAACAACAAANGG	GaAATA-TATGcACAACAttTGG	3	41019971	-	4	1
RNA	GCAATAGTATGAACAACAAANGG	aCAATA-TATtAACAAaAAgGGG	3	41487932	-	4	1
RNA	GCAATAGTATGAACAACAAANGG	GaAATA-TATtAACAcCAcAAGG	3	41935720	+	4	1
RNA	GCAATAGTATGAACAACAAANGG	GaAATA-TATtAACAtCAtAAGG	3	42673940	+	4	1
RNA	GCAATAGTATGAACAACAAANGG	GCAAaA-cAgaAACAACAAAAGG	3	43697817	+	4	1
RNA	GCAATAGTATGAACAACAAANGG	GCAtaA-gATGAACAAgAAAAGG	3	44535427	+	4	1
RNA	GCAATAGTATGAACAACAAANGG	tCtATA-TATGAAtAAaAAAAGG	3	44952610	+	4	1
RNA	GCAATAGTATGAACAACAAANGG	tCtATA-TATGAAtAAaAAAAGG	3	44952565	+	4	1
RNA	GCAATAGTATGAACAACAAANGG	tCAATA-TATcAACAggAAAAGG	3	45064183	-	4	1
RNA	GCAATAGTATGAACAACAAANGG	agAATg-TATGAACAACAgACGG	3	49248290	+	4	1
RNA	GCAATAGTATGAACAACAAANGG	GatATA-TAgGcACAACAAATGG	3	52937480	-	4	1
RNA	GCAATAGTATGAACAACAAANGG	GtAAaA-TAgGAAgAACAAATGG	3	54924640	+	4	1
RNA	GCAATAGTATGAACAACAAANGG	atAATA-TATaAACcACAAATGG	3	54821127	-	4	1
RNA	GCAATAGTATGAACAACAAANGG	GCAATA-cATGAAgAgCAtATGG	3	54969559	-	4	1
RNA	GCAATAGTATGAACAACAAANGG	GgAATc-TtTGAACgACAAAGGG	3	55359540	-	4	1
RNA	GCAATAGTATGAACAACAAANGG	aCAATA-ggTGAAaAACAAAAGG	3	55478143	-	4	1
RNA	GCAATAGTATGAACAACAAANGG	tCAATc-TATGAACAtCAAcTGG	4	682642	+	4	1
RNA	GCAATAGTATGAACAACAAANGG	GCAATA-TtTGcACAAgcAACGG	4	1511066	+	4	1
RNA	GCAATAGTATGAACAACAAANGG	aCAATA-TAacAACAtCAAATGG	4	3515166	+	4	1
RNA	GCAATAGTATGAACAACAAANGG	GtAATA-TATGtACAACcAtTGG	4	4511967	-	4	1
RNA	GCAATAGTATGAACAACAAANGG	GgAAaA-TATGAACAcCAAgAGG	4	5263771	+	4	1
RNA	GCAATAGTATGAACAACAAANGG	aCAATA-TtTcAACAAaAAATGG	4	8193169	+	4	1
RNA	GCAATAGTATGAACAACAAANGG	tgAAcg-TATGAACAACAAAGGG	4	8727527	-	4	1
RNA	GCAATAGTATGAACAACAAANGG	GCAgTAtTAT-cACAAtAAATGG	scaffold0780	5782	-	4	1
RNA	GCAATAGTATGAACAACAAANGG	aCAATAGTAT-AtCAAacAAAGG	scaffold0655	536	-	4	1
RNA	GCAATAGTATGAACAACAAANGG	GCAgTAtTAT-cACAAtAAATGG	scaffold0594	2987	-	4	1
RNA	GCAATAGTATGAACAACAAANGG	GCAgTAtTAT-cACAAtAAATGG	scaffold0439	8188	-	4	1
RNA	GCAATAGTATGAACAACAAANGG	GCAgTAtTAT-cACAAtAAATGG	scaffold0439	328	-	4	1
RNA	GCAATAGTATGAACAACAAANGG	GCAgTAtTAT-cACAAtAAATGG	scaffold0387	12019	+	4	1
RNA	GCAATAGTATGAACAACAAANGG	GCAgTAtTAT-cACAAtAAATGG	scaffold0269	11891	+	4	1
RNA	GCAATAGTATGAACAACAAANGG	GtAgTAtTAT-AACAAtAAATGG	scaffold0217	11637	+	4	1
RNA	GCAATAGTATGAACAACAAANGG	GCAgTAtTAT-cACAAtAAATGG	scaffold0207	25339	+	4	1
RNA	GCAATAGTATGAACAACAAANGG	GCAgTAtTAT-cACAAtAAATGG	scaffold0211	5832	-	4	1
RNA	GCAATAGTATGAACAACAAANGG	GCAATAtTAT-cAtAAtAAATGG	scaffold0193	7706	+	4	1
RNA	GCAATAGTATGAACAACAAANGG	GCAgTAtTAT-cACAAtAAATGG	scaffold0185	14000	+	4	1
RNA	GCAATAGTATGAACAACAAANGG	tCAATAtTAT-cACAAtAAATGG	scaffold0183	3319	+	4	1
RNA	GCAATAGTATGAACAACAAANGG	GCAgTAtTAT-cACAAtAAATGG	scaffold0133	36029	+	4	1
RNA	GCAATAGTATGAACAACAAANGG	GCAgTAtTAT-cACAAtAAATGG	scaffold0132	33677	-	4	1
RNA	GCAATAGTATGAACAACAAANGG	GCAgTAtTAT-cACAAtAAATGG	scaffold0132	20476	-	4	1
RNA	GCAATAGTATGAACAACAAANGG	cCAATAGTAT-cAaAtCAAATGG	scaffold0125	20952	-	4	1
RNA	GCAATAGTATGAACAACAAANGG	GCAgTAtTAT-cACAAtAAATGG	scaffold0105	42896	-	4	1
RNA	GCAATAGTATGAACAACAAANGG	GCAgTAtTAT-cACAAtAAACGG	scaffold0084	42705	+	4	1
RNA	GCAATAGTATGAACAACAAANGG	GCAgTAtTAT-cACAAtAAATGG	scaffold0047	3380	+	4	1
RNA	GCAATAGTATGAACAACAAANGG	GCAgTAtTAT-cACAAaAAATGG	scaffold0047	38821	-	4	1
RNA	GCAATAGTATGAACAACAAANGG	GCAgTAtTAT-cACAAtAAATGG	scaffold0047	42684	-	4	1
RNA	GCAATAGTATGAACAACAAANGG	GCAATAtTAT-cAtAAtAAATGG	scaffold0018	2239	-	4	1
RNA	GCAATAGTATGAACAACAAANGG	GCAgTAtTAT-cACAAtAAATGG	scaffold0015	161531	-	4	1
RNA	GCAATAGTATGAACAACAAANGG	GCAAaAGaAa-AACAcCAAACGG	scaffold0004	110382	+	4	1
RNA	GCAATAGTATGAACAACAAANGG	GCAATAtTAa-cACAAtAAATGG	scaffold0004	7705	-	4	1
RNA	GCAATAGTATGAACAACAAANGG	GCAAaAGTAT-gAtcACAAATGG	6	1194006	+	4	1
RNA	GCAATAGTATGAACAACAAANGG	GCAgTAtTAT-cACAAtAAATGG	6	1655647	+	4	1
RNA	GCAATAGTATGAACAACAAANGG	aCtATAcTAT-tACAACAAAAGG	6	2502617	-	4	1
RNA	GCAATAGTATGAACAACAAANGG	GCAgTAtTAT-cACAAtAAATGG	6	3666293	+	4	1
RNA	GCAATAGTATGAACAACAAANGG	GCAgTAtTAT-cACAAtAAATGG	6	4635793	+	4	1
RNA	GCAATAGTATGAACAACAAANGG	GCAATAaTAT-AAaAACtcAGGG	6	5957578	-	4	1
RNA	GCAATAGTATGAACAACAAANGG	GaAATtGTAT-AcCAgCAAAAGG	6	9350991	+	4	1
RNA	GCAATAGTATGAACAACAAANGG	agAtTAGTAT-cACAACAAATGG	6	9564915	+	4	1
RNA	GCAATAGTATGAACAACAAANGG	GCAgTAtTAT-cACAAtAAATGG	6	12859798	+	4	1
RNA	GCAATAGTATGAACAACAAANGG	GCAgTAtTAT-cACAAtAAATGG	6	12722747	-	4	1
RNA	GCAATAGTATGAACAACAAANGG	GCAgTAtTAT-cACAAtAAATGG	6	13918113	+	4	1
RNA	GCAATAGTATGAACAACAAANGG	GCAATAtTAT-cACAtaAAATGG	6	14170216	-	4	1
RNA	GCAATAGTATGAACAACAAANGG	GCAgTAtTAT-cACAAtAAATGG	6	16953875	+	4	1
RNA	GCAATAGTATGAACAACAAANGG	GgAATAGTAT-AACtAacAATGG	6	21547806	+	4	1
RNA	GCAATAGTATGAACAACAAANGG	GCAgTAtTAT-cACAAtAAATGG	6	22380901	+	4	1
RNA	GCAATAGTATGAACAACAAANGG	tCAAcAcTtT-AACAACAAAAGG	6	22573382	+	4	1
RNA	GCAATAGTATGAACAACAAANGG	GCAATtGgAT-AcCAACAAcTGG	6	25115953	-	4	1
RNA	GCAATAGTATGAACAACAAANGG	GCAgTAtTAT-cACAAtAAATGG	6	25792581	+	4	1
RNA	GCAATAGTATGAACAACAAANGG	GCAgTAtTAT-cACAAaAAATGG	6	26038482	+	4	1
RNA	GCAATAGTATGAACAACAAANGG	GCAgTAtTAT-cACAAtAAATGG	6	26030287	+	4	1
RNA	GCAATAGTATGAACAACAAANGG	GCAgTAtTAT-cACAAtAAATGG	6	26869669	+	4	1
RNA	GCAATAGTATGAACAACAAANGG	GCAgTAtTAT-cACAAtAAATGG	6	27346612	+	4	1
RNA	GCAATAGTATGAACAACAAANGG	GCAgTAtTAT-cACAAaAAATGG	6	27377660	+	4	1
RNA	GCAATAGTATGAACAACAAANGG	GCAgTAtTAT-cACAAaAAATGG	6	27468017	+	4	1
RNA	GCAATAGTATGAACAACAAANGG	GCAgTAtTAT-cACAAtAAATGG	6	27407352	+	4	1
RNA	GCAATAGTATGAACAACAAANGG	GCAgTAtTAT-cACAAaAAATGG	6	27498570	+	4	1
RNA	GCAATAGTATGAACAACAAANGG	GCgATAGTgT-tACAAaAAAAGG	6	28935002	-	4	1
RNA	GCAATAGTATGAACAACAAANGG	GCAgTAtTAT-cACAAtAAATGG	6	32306957	-	4	1
RNA	GCAATAGTATGAACAACAAANGG	GCAgTAtTAT-cACAAtAAATGG	6	32967857	-	4	1
RNA	GCAATAGTATGAACAACAAANGG	GCAgTAtTAT-cACAAtAAATGG	6	34813074	-	4	1
RNA	GCAATAGTATGAACAACAAANGG	GCAATAGTAT-tAttAaAAATGG	5	200918	-	4	1
RNA	GCAATAGTATGAACAACAAANGG	GCAATAGTcg-AAgAACtAACGG	5	2300869	+	4	1
RNA	GCAATAGTATGAACAACAAANGG	aaAATAaTcT-AACAACAAAAGG	5	4792889	+	4	1
RNA	GCAATAGTATGAACAACAAANGG	GCAATtGTAT-AAtAACtAcGGG	5	6738368	+	4	1
RNA	GCAATAGTATGAACAACAAANGG	GCAATtGTAT-ActAACAAgGGG	5	6715794	+	4	1
RNA	GCAATAGTATGAACAACAAANGG	GaAATAGTAa-AAaAAgAAATGG	5	7248933	+	4	1
RNA	GCAATAGTATGAACAACAAANGG	GCAgTAtTAT-cACAAtAAATGG	5	6981829	-	4	1
RNA	GCAATAGTATGAACAACAAANGG	GgAATAGTAg-AACAAtAAgAGG	5	8594067	+	4	1
RNA	GCAATAGTATGAACAACAAANGG	GCAgTAtTAT-cACAAtAAATGG	5	9341979	-	4	1
RNA	GCAATAGTATGAACAACAAANGG	GCAAgAGTtT-ttCAACAAAAGG	5	11933397	+	4	1
RNA	GCAATAGTATGAACAACAAANGG	GCAgTAtTAT-cACAAtAAATGG	5	14036066	-	4	1
RNA	GCAATAGTATGAACAACAAANGG	GCAgTAtTAT-cACAAtAAATGG	5	14451826	+	4	1
RNA	GCAATAGTATGAACAACAAANGG	GCAgTAtTAT-cACAAtAAATGG	5	14562867	+	4	1
RNA	GCAATAGTATGAACAACAAANGG	GCAgTAtTAT-cACAAtAAATGG	5	15998110	+	4	1
RNA	GCAATAGTATGAACAACAAANGG	GCAgTAtTAT-cACAAtAAATGG	5	15745993	-	4	1
RNA	GCAATAGTATGAACAACAAANGG	GCAATAcTAg-AttAACAAAAGG	5	16560117	-	4	1
RNA	GCAATAGTATGAACAACAAANGG	GCAATAtTAT-cACAAaAgATGG	5	17451526	+	4	1
RNA	GCAATAGTATGAACAACAAANGG	cCAATAGgAT-AACAAtAtATGG	5	17205206	-	4	1
RNA	GCAATAGTATGAACAACAAANGG	GCAgTAtTAT-cACAAtAAATGG	5	17613086	-	4	1
RNA	GCAATAGTATGAACAACAAANGG	GCAgTAtTAT-cACAAtAAATGG	5	17724942	-	4	1
RNA	GCAATAGTATGAACAACAAANGG	GCtcTAGTAa-tACAACAAAAGG	5	18642780	-	4	1
RNA	GCAATAGTATGAACAACAAANGG	GCAgTAtTAT-cACAAaAAATGG	5	19469996	-	4	1
RNA	GCAATAGTATGAACAACAAANGG	GCAgTAtTAT-cACAAtAAATGG	5	22682140	-	4	1
RNA	GCAATAGTATGAACAACAAANGG	GCAgTAtTAT-cACAAtAAATGG	5	23483016	+	4	1
RNA	GCAATAGTATGAACAACAAANGG	GCAgTAtTAT-cACAAtAAATGG	5	23302301	-	4	1
RNA	GCAATAGTATGAACAACAAANGG	GCAgTAtTAT-cACAAtAAATGG	5	23367960	-	4	1
RNA	GCAATAGTATGAACAACAAANGG	GCAgTAtTAT-cACAAtAAATGG	5	24573096	-	4	1
RNA	GCAATAGTATGAACAACAAANGG	GCAgTAtTAT-cACAAtAAATGG	5	24821690	+	4	1
RNA	GCAATAGTATGAACAACAAANGG	GCAgTAtTAT-cACAAtAAATGG	5	24813937	-	4	1
RNA	GCAATAGTATGAACAACAAANGG	GCAgTAtTAT-cACAAtAAATGG	5	27047051	+	4	1
RNA	GCAATAGTATGAACAACAAANGG	GCAgTAtTAT-cACAAtAAATGG	5	27466186	-	4	1
RNA	GCAATAGTATGAACAACAAANGG	GCAATAtTAa-AACcAtAAATGG	5	29700001	+	4	1
RNA	GCAATAGTATGAACAACAAANGG	GCAgTAtTAT-cACAAtAAATGG	5	31354558	-	4	1
RNA	GCAATAGTATGAACAACAAANGG	GCAgTAtTAT-cACAAtAAATGG	5	31839504	-	4	1
RNA	GCAATAGTATGAACAACAAANGG	cCAATAGTAT-AAaAtaAAAGGG	5	32976817	-	4	1
RNA	GCAATAGTATGAACAACAAANGG	GCAAaAaTAg-AAgAACAAATGG	5	33243887	-	4	1
RNA	GCAATAGTATGAACAACAAANGG	GCAATAtTAT-cACAAaAgATGG	5	34777920	-	4	1
RNA	GCAATAGTATGAACAACAAANGG	GCAgTAtTAT-cACAAtAAATGG	5	35221527	-	4	1
RNA	GCAATAGTATGAACAACAAANGG	GCAgTAtTAT-cACAAtAAATGG	5	36587331	+	4	1
RNA	GCAATAGTATGAACAACAAANGG	GCAgTAtTAT-cACAAtAAATGG	5	36693722	-	4	1
RNA	GCAATAGTATGAACAACAAANGG	aaAATAGTAT-AAaAACtAAAGG	5	37517470	+	4	1
RNA	GCAATAGTATGAACAACAAANGG	GCAgTAtTAT-cACAAtAAATGG	5	37734781	+	4	1
RNA	GCAATAGTATGAACAACAAANGG	tCAATAaTAT-ttCAACAAAAGG	5	38633229	-	4	1
RNA	GCAATAGTATGAACAACAAANGG	GCAgTAtTAT-cACAAtAAATGG	5	39495701	+	4	1
RNA	GCAATAGTATGAACAACAAANGG	GCAcaAGTAa-AAaAACAAATGG	5	41695846	-	4	1
RNA	GCAATAGTATGAACAACAAANGG	GCAgTAtTAT-cACAAtAAATGG	8	246722	+	4	1
RNA	GCAATAGTATGAACAACAAANGG	GCAgTAtTAT-cACAAtAAATGG	8	809842	+	4	1
RNA	GCAATAGTATGAACAACAAANGG	GCAgTAtTAT-cACAAtAAATGG	8	3354571	-	4	1
RNA	GCAATAGTATGAACAACAAANGG	GCAgTAtTAT-cACAAtAAATGG	8	9346012	+	4	1
RNA	GCAATAGTATGAACAACAAANGG	GCAAaAGTAT-AtaAAtAAAGGG	8	10419362	+	4	1
RNA	GCAATAGTATGAACAACAAANGG	GCAAaAGTcT-AAaAAaAAATGG	8	13276334	-	4	1
RNA	GCAATAGTATGAACAACAAANGG	GCAgTAtTAT-cACAAtAAATGG	8	13694506	-	4	1
RNA	GCAATAGTATGAACAACAAANGG	GaAATAGTAT-tACAcCAtAAGG	8	15965960	+	4	1
RNA	GCAATAGTATGAACAACAAANGG	GCAgTAtTAT-cACAAtAAATGG	8	15786646	-	4	1
RNA	GCAATAGTATGAACAACAAANGG	GCAgTAtTAT-cACAAtAAATGG	8	17264277	+	4	1
RNA	GCAATAGTATGAACAACAAANGG	GCAgTAtTAT-cACAAtAAATGG	8	19934033	+	4	1
RNA	GCAATAGTATGAACAACAAANGG	GCAgTAtTAT-cACAAtAAATGG	8	22667973	+	4	1
RNA	GCAATAGTATGAACAACAAANGG	GCAgTAtTAT-cACAAtAAATGG	8	29081305	+	4	1
RNA	GCAATAGTATGAACAACAAANGG	GCAgTAtTAT-cACAAtAAATGG	8	32083632	-	4	1
RNA	GCAATAGTATGAACAACAAANGG	GCAgTAtTAT-cACAAtAAATGG	8	36082835	+	4	1
RNA	GCAATAGTATGAACAACAAANGG	GCAgTAtTAT-cACAAtAAATGG	8	36297840	+	4	1
RNA	GCAATAGTATGAACAACAAANGG	GCAATgGTAc-AAaAAaAAAAGG	8	36931859	+	4	1
RNA	GCAATAGTATGAACAACAAANGG	GCAATAcatT-AACAACAcATGG	8	37515163	+	4	1
RNA	GCAATAGTATGAACAACAAANGG	GCAAaAtTAa-AACAAgAAATGG	8	38343156	+	4	1
RNA	GCAATAGTATGAACAACAAANGG	GaAATAGcAT-AtaAACAAAAGG	8	39188798	+	4	1
RNA	GCAATAGTATGAACAACAAANGG	GCAgTAtTAT-cACAAtAAATGG	8	44486028	+	4	1
RNA	GCAATAGTATGAACAACAAANGG	GtAATAaTAT-AgaAACAAATGG	8	44332274	-	4	1
RNA	GCAATAGTATGAACAACAAANGG	GCAgTAGTAT-cACAgtAAATGG	2	32666	+	4	1
RNA	GCAATAGTATGAACAACAAANGG	GaAAaAGaAT-AAaAACAAACGG	2	1491063	+	4	1
RNA	GCAATAGTATGAACAACAAANGG	GCAgTAtTAT-cACAAtAAATGG	2	4214764	+	4	1
RNA	GCAATAGTATGAACAACAAANGG	cCAAatGTAg-AACAACAAAGGG	2	8508310	-	4	1
RNA	GCAATAGTATGAACAACAAANGG	aCAATAaTAT-AtaAACAAATGG	2	9794552	+	4	1
RNA	GCAATAGTATGAACAACAAANGG	GCAgTAtTAT-cACAAtAAATGG	2	9768684	-	4	1
RNA	GCAATAGTATGAACAACAAANGG	GCAgTAtTAT-cACAAtAAATGG	2	10271855	+	4	1
RNA	GCAATAGTATGAACAACAAANGG	GCAgTAtTAT-cACAAtAAATGG	2	9903494	-	4	1
RNA	GCAATAGTATGAACAACAAANGG	GCAgTAtTAT-cACAAtAAATGG	2	11401093	-	4	1
RNA	GCAATAGTATGAACAACAAANGG	GCAgTAaTAa-AtCAACAAAAGG	2	11677734	-	4	1
RNA	GCAATAGTATGAACAACAAANGG	GCAgTAaTAa-AtCAACAAAAGG	2	11695212	-	4	1
RNA	GCAATAGTATGAACAACAAANGG	GCAATAGcAa-AgCAACAAtGGG	2	20493913	+	4	1
RNA	GCAATAGTATGAACAACAAANGG	GCAgTAtTAT-cACAAtAAATGG	2	21126863	-	4	1
RNA	GCAATAGTATGAACAACAAANGG	GCAgTAtTAT-cACAAtAAATGG	2	24333670	-	4	1
RNA	GCAATAGTATGAACAACAAANGG	GCAgTAtTAT-cACAAaAAATGG	2	24420866	-	4	1
RNA	GCAATAGTATGAACAACAAANGG	GCAATAtTAT-cAtAAtAAATGG	2	24810295	-	4	1
RNA	GCAATAGTATGAACAACAAANGG	GCAgTAtTAT-cACAAtAAATGG	2	27226307	+	4	1
RNA	GCAATAGTATGAACAACAAANGG	GgAAcAacAT-AACAACAAAAGG	2	29917646	-	4	1
RNA	GCAATAGTATGAACAACAAANGG	GCAAaAGTAg-AAaAAaAAAAGG	2	30351072	-	4	1
RNA	GCAATAGTATGAACAACAAANGG	GCAgTAtTAT-cACAAtAAATGG	2	34796138	-	4	1
RNA	GCAATAGTATGAACAACAAANGG	GCAgTAtTAT-cACAAtAAATGG	2	35257873	+	4	1
RNA	GCAATAGTATGAACAACAAANGG	GCAgTAtTAT-cACAAtAAATGG	2	35268498	+	4	1
RNA	GCAATAGTATGAACAACAAANGG	tCAATtGTtg-AACAACAAAAGG	2	35797398	+	4	1
RNA	GCAATAGTATGAACAACAAANGG	GCAgTAtTAT-cACAAtAAATGG	2	39176015	-	4	1
RNA	GCAATAGTATGAACAACAAANGG	GCAtTgGcAT-AcCAACAAATGG	2	39324974	-	4	1
RNA	GCAATAGTATGAACAACAAANGG	GCAgTAtTAT-cACAAtAAATGG	2	40245477	+	4	1
RNA	GCAATAGTATGAACAACAAANGG	GCAATAGcAg-AgCAACAcAGGG	2	41470373	+	4	1
RNA	GCAATAGTATGAACAACAAANGG	GCAATAGagg-AgCAACAAAAGG	2	41484261	+	4	1
RNA	GCAATAGTATGAACAACAAANGG	GCAgTAtTAT-cACAAtAAATGG	2	43350271	+	4	1
RNA	GCAATAGTATGAACAACAAANGG	tCAATAGTAT-tAaAAaAAAAGG	2	43449306	+	4	1
RNA	GCAATAGTATGAACAACAAANGG	tCtATAaTtT-AACAACAAAAGG	7	350799	-	4	1
RNA	GCAATAGTATGAACAACAAANGG	GCAgTAtTAT-cACAAtAAATGG	7	462971	-	4	1
RNA	GCAATAGTATGAACAACAAANGG	GCAgTAtTAT-cACAAtAAATGG	7	1992451	+	4	1
RNA	GCAATAGTATGAACAACAAANGG	atAATAtTAT-AAgAACAAAAGG	7	2119504	+	4	1
RNA	GCAATAGTATGAACAACAAANGG	GCAATAaTAT-AtaAACAtAGGG	7	2310196	-	4	1
RNA	GCAATAGTATGAACAACAAANGG	GCAgTAtTAT-cACAAtAAATGG	7	2711598	-	4	1
RNA	GCAATAGTATGAACAACAAANGG	GCAgTAtTAT-cACAAtAAATGG	7	4420819	-	4	1
RNA	GCAATAGTATGAACAACAAANGG	GCAgTAtTAT-cACAAtAAATGG	7	8008051	-	4	1
RNA	GCAATAGTATGAACAACAAANGG	GCAgTAtTAT-cACAAtAAATGG	7	8622258	+	4	1
RNA	GCAATAGTATGAACAACAAANGG	GCAgTAtTAT-cACAAtAAATGG	7	9090129	+	4	1
RNA	GCAATAGTATGAACAACAAANGG	GCAgTAtTAT-cACAAtAAATGG	7	11010082	+	4	1
RNA	GCAATAGTATGAACAACAAANGG	GaAATAGTAT-AACtAacAATGG	7	14702994	-	4	1
RNA	GCAATAGTATGAACAACAAANGG	GaAATAGTAT-AACtAacAATGG	7	14701590	-	4	1
RNA	GCAATAGTATGAACAACAAANGG	GCAgTAtTAT-cACAAtAAATGG	7	17956099	-	4	1
RNA	GCAATAGTATGAACAACAAANGG	cCAATAGTgT-AACAAaAtATGG	7	18862776	+	4	1
RNA	GCAATAGTATGAACAACAAANGG	GtAgTAGTAa-AACAACAtATGG	7	19359979	-	4	1
RNA	GCAATAGTATGAACAACAAANGG	GgAATAGTAT-gAacACAAATGG	7	21147910	-	4	1
RNA	GCAATAGTATGAACAACAAANGG	GCAgTAtTAT-cACAAtAAATGG	7	22094036	+	4	1
RNA	GCAATAGTATGAACAACAAANGG	GCAgTAGcAc-cACAACAAAAGG	7	21846768	-	4	1
RNA	GCAATAGTATGAACAACAAANGG	aCAATAaTAT-AACAAatAATGG	7	22608470	+	4	1
RNA	GCAATAGTATGAACAACAAANGG	GCAgTAtTAT-cACAAtAAATGG	7	24738996	+	4	1
RNA	GCAATAGTATGAACAACAAANGG	GaAATAGTAa-cAtAACAAATGG	7	25829563	-	4	1
RNA	GCAATAGTATGAACAACAAANGG	GCAgTAtTAT-cACAAtAAATGG	7	26396079	-	4	1
RNA	GCAATAGTATGAACAACAAANGG	GCAgTAtTAT-cACAAtAAATGG	7	26691727	-	4	1
RNA	GCAATAGTATGAACAACAAANGG	GCAtaAacAT-AACAACAAATGG	7	27931234	+	4	1
RNA	GCAATAGTATGAACAACAAANGG	GtAATAGTAT-AACAAtAggGGG	7	31461504	-	4	1
RNA	GCAATAGTATGAACAACAAANGG	GtAATttTAT-AtCAACAAAGGG	7	33106463	-	4	1
RNA	GCAATAGTATGAACAACAAANGG	GtAATAtcAT-AACAgCAAATGG	7	35567315	+	4	1
RNA	GCAATAGTATGAACAACAAANGG	aCAATtGaAT-tACAACAAAAGG	7	38465354	+	4	1
RNA	GCAATAGTATGAACAACAAANGG	GtcATcGTAT-AACAAaAAAAGG	7	38544664	+	4	1
RNA	GCAATAGTATGAACAACAAANGG	GCAtTAGaAT-gAtAACAAAAGG	7	40604441	-	4	1
RNA	GCAATAGTATGAACAACAAANGG	tCAATtGTAT-AtCtACAAAAGG	7	41502267	-	4	1
RNA	GCAATAGTATGAACAACAAANGG	GCAgTAtTAT-cACAAtAAATGG	7	42870743	+	4	1
RNA	GCAATAGTATGAACAACAAANGG	GCAATAGTAa-cACAgaAAAAGG	7	45751894	+	4	1
RNA	GCAATAGTATGAACAACAAANGG	GCAATAGTtT-gACAAaAcACGG	1	1311502	+	4	1
RNA	GCAATAGTATGAACAACAAANGG	GCAgTAtTAT-cACAAtAAATGG	1	3176456	+	4	1
RNA	GCAATAGTATGAACAACAAANGG	aCAATtaTAT-AACAtCAAAGGG	1	4865148	-	4	1
RNA	GCAATAGTATGAACAACAAANGG	GCAgTAtTAT-cACAAtAAATGG	1	5838059	+	4	1
RNA	GCAATAGTATGAACAACAAANGG	GCAgTAtTAT-cACAAtAAATGG	1	5645651	-	4	1
RNA	GCAATAGTATGAACAACAAANGG	GCAgTAtTAT-cACAAtAAATGG	1	7512129	+	4	1
RNA	GCAATAGTATGAACAACAAANGG	GCAgTAtTAT-cACAAtAAATGG	1	7695418	-	4	1
RNA	GCAATAGTATGAACAACAAANGG	GCAgTAtTAT-cACAAtAAATGG	1	12735383	+	4	1
RNA	GCAATAGTATGAACAACAAANGG	tCAATtGTAc-AACAACAAgAGG	1	12684162	-	4	1
RNA	GCAATAGTATGAACAACAAANGG	GCAAgAaTAT-AAgAAaAAATGG	1	17463094	-	4	1
RNA	GCAATAGTATGAACAACAAANGG	GCAgTAaTAT-AcCAAgAAATGG	1	17800729	+	4	1
RNA	GCAATAGTATGAACAACAAANGG	GCAgTAtTAT-cACAAtAAATGG	1	21868518	+	4	1
RNA	GCAATAGTATGAACAACAAANGG	GCAgTAtTAT-cACAAtAAATGG	1	22126345	+	4	1
RNA	GCAATAGTATGAACAACAAANGG	aCAATAaTAT-AACAAatAATGG	1	22766282	+	4	1
RNA	GCAATAGTATGAACAACAAANGG	aCAATAaTAT-AACAAatAATGG	1	27689940	-	4	1
RNA	GCAATAGTATGAACAACAAANGG	agAtTAGTgT-AACAACAAAAGG	1	30228297	-	4	1
RNA	GCAATAGTATGAACAACAAANGG	aCAATAaTAT-AACAAatAATGG	1	30551030	+	4	1
RNA	GCAATAGTATGAACAACAAANGG	cCAAaAGTAT-AAaAACAcATGG	1	30727407	+	4	1
RNA	GCAATAGTATGAACAACAAANGG	GtAATAtTAT-AACAAaAtAAGG	1	32710162	-	4	1
RNA	GCAATAGTATGAACAACAAANGG	tCtgcAGTAT-AACAACAAATGG	1	33586962	-	4	1
RNA	GCAATAGTATGAACAACAAANGG	GCcATgGTAT-AAaAACAAgAGG	1	34640086	-	4	1
RNA	GCAATAGTATGAACAACAAANGG	GCAATgGTta-tACAACAAATGG	1	35331381	+	4	1
RNA	GCAATAGTATGAACAACAAANGG	GCAgTAtTAT-cACAAtAAATGG	1	35396443	-	4	1
RNA	GCAATAGTATGAACAACAAANGG	GCAgTAtTAT-cACAAtAAATGG	1	35643985	-	4	1
RNA	GCAATAGTATGAACAACAAANGG	GCAAattgAT-AACAACAAAGGG	1	36785607	+	4	1
RNA	GCAATAGTATGAACAACAAANGG	cCAAaAGTgT-AAaAACAAATGG	1	37200017	+	4	1
RNA	GCAATAGTATGAACAACAAANGG	GCAgTAtTAT-cACAAtAAATGG	1	38099940	+	4	1
RNA	GCAATAGTATGAACAACAAANGG	aCAcTAGTAT-AACAgaAAAGGG	1	37936464	-	4	1
RNA	GCAATAGTATGAACAACAAANGG	GCAAaAGTAT-AAaAgaAAAAGG	1	37850501	-	4	1
RNA	GCAATAGTATGAACAACAAANGG	GtcATAacAT-AACAACAAAAGG	1	40528712	+	4	1
RNA	GCAATAGTATGAACAACAAANGG	GaAATAGTAa-AAtAAtAAATGG	1	42201195	+	4	1
RNA	GCAATAGTATGAACAACAAANGG	GaAATAGTAa-AAtAAtAAATGG	1	42210063	+	4	1
RNA	GCAATAGTATGAACAACAAANGG	GCAATAaTAT-AAaAACtgAAGG	1	42522423	-	4	1
RNA	GCAATAGTATGAACAACAAANGG	GaAATAGgAa-AACtACAAAAGG	1	44459459	-	4	1
RNA	GCAATAGTATGAACAACAAANGG	GCAATAaTAa-AAaAAaAAATGG	1	44957464	+	4	1
RNA	GCAATAGTATGAACAACAAANGG	GCAcTAGTtT-ttCAACAAAAGG	1	46232443	-	4	1
RNA	GCAATAGTATGAACAACAAANGG	cCAAaAGTAa-AcCAACAAAAGG	1	47383214	-	4	1
RNA	GCAATAGTATGAACAACAAANGG	GCAgTAtTAT-cACAAtAAATGG	1	47613879	-	4	1
RNA	GCAATAGTATGAACAACAAANGG	GaAATAGTtT-AtCAACtAAAGG	1	49650985	+	4	1
RNA	GCAATAGTATGAACAACAAANGG	GCAAaAGaAa-AAaAACAAAGGG	1	50479194	+	4	1
RNA	GCAATAGTATGAACAACAAANGG	GCAgTAtTAT-cACAAtAAATGG	1	51651820	-	4	1
RNA	GCAATAGTATGAACAACAAANGG	GCAATAGTAc-ctCAACgAATGG	3	782550	+	4	1
RNA	GCAATAGTATGAACAACAAANGG	GCAgTAtTAT-cACAAaAAATGG	3	1789772	-	4	1
RNA	GCAATAGTATGAACAACAAANGG	cCAcTAGTcT-AACtACAAATGG	3	2405802	+	4	1
RNA	GCAATAGTATGAACAACAAANGG	GCAgTAtTAT-cACAAtAAATGG	3	4748632	+	4	1
RNA	GCAATAGTATGAACAACAAANGG	GCAgTAtTAT-cACAAtAAATGG	3	5198014	+	4	1
RNA	GCAATAGTATGAACAACAAANGG	GCAgTAtTAT-cACAAtAAATGG	3	5515586	+	4	1
RNA	GCAATAGTATGAACAACAAANGG	GCAgTAtTAT-cACAAtAAATGG	3	5542922	-	4	1
RNA	GCAATAGTATGAACAACAAANGG	GCAgTAtTAT-cACAAtAAATGG	3	5623297	-	4	1
RNA	GCAATAGTATGAACAACAAANGG	GCAgTAtTAT-cACAAtAAATGG	3	5871597	-	4	1
RNA	GCAATAGTATGAACAACAAANGG	GCAgTAtTAT-cACAAaAAATGG	3	6496243	-	4	1
RNA	GCAATAGTATGAACAACAAANGG	aCAATAGTAT-AtCAAacAAAGG	3	8504428	+	4	1
RNA	GCAATAGTATGAACAACAAANGG	GCAgTAtTAT-cACAAtAAATGG	3	8779576	+	4	1
RNA	GCAATAGTATGAACAACAAANGG	GCAgTAtTAT-cACAAaAAATGG	3	9987788	-	4	1
RNA	GCAATAGTATGAACAACAAANGG	GCAAgAGTAT-AcCAgCgAAAGG	3	10356129	-	4	1
RNA	GCAATAGTATGAACAACAAANGG	GCAgTAtTAT-cACAAaAAATGG	3	10632724	-	4	1
RNA	GCAATAGTATGAACAACAAANGG	GCAgTAtTAT-cACAAtAAATGG	3	11278286	-	4	1
RNA	GCAATAGTATGAACAACAAANGG	GCAAaAGTAT-AcCttCAAACGG	3	11516134	-	4	1
RNA	GCAATAGTATGAACAACAAANGG	GCAgTAtTAT-cACAAaAAATGG	3	12243460	-	4	1
RNA	GCAATAGTATGAACAACAAANGG	GCAgTAtTAT-cACAAtAAATGG	3	12292090	-	4	1
RNA	GCAATAGTATGAACAACAAANGG	tCAAaAGTgT-AAaAACAAATGG	3	13582544	+	4	1
RNA	GCAATAGTATGAACAACAAANGG	GCAgTAtTAT-cACAAtAAATGG	3	13389162	-	4	1
RNA	GCAATAGTATGAACAACAAANGG	GCAgTAtTAT-cACAAtAAATGG	3	13378568	-	4	1
RNA	GCAATAGTATGAACAACAAANGG	GCAgTAtTAT-cACAAtAAATGG	3	16425058	-	4	1
RNA	GCAATAGTATGAACAACAAANGG	GCAgTAtTAT-cACAAtAAATGG	3	17021853	+	4	1
RNA	GCAATAGTATGAACAACAAANGG	GCAgTAtTAT-cACAAtAAATGG	3	17011047	+	4	1
RNA	GCAATAGTATGAACAACAAANGG	GCAgTAtTAT-cACAAtAAATGG	3	17250662	-	4	1
RNA	GCAATAGTATGAACAACAAANGG	cCAATgGTAc-AACAACAAgTGG	3	17470258	-	4	1
RNA	GCAATAGTATGAACAACAAANGG	GCAATAtTAT-cACAAtAgATGG	3	19783335	+	4	1
RNA	GCAATAGTATGAACAACAAANGG	GCAgTAtTAT-cACAAtAAATGG	3	23762207	+	4	1
RNA	GCAATAGTATGAACAACAAANGG	GCAgTAtTAT-cACAAtAAATGG	3	24664783	+	4	1
RNA	GCAATAGTATGAACAACAAANGG	GCAgTAtTAT-cACAAtAAATGG	3	24389419	-	4	1
RNA	GCAATAGTATGAACAACAAANGG	ttAcTAGTAT-AAaAACAAAAGG	3	25228636	-	4	1
RNA	GCAATAGTATGAACAACAAANGG	aCAATAaTtT-AAaAACAAAAGG	3	27938573	-	4	1
RNA	GCAATAGTATGAACAACAAANGG	GCAgTAtTAT-cACAAtAAATGG	3	28320139	-	4	1
RNA	GCAATAGTATGAACAACAAANGG	aCAATAtTAT-AACAgCAtATGG	3	31607301	-	4	1
RNA	GCAATAGTATGAACAACAAANGG	tCAATAaTgT-AACtACAAAGGG	3	33785283	+	4	1
RNA	GCAATAGTATGAACAACAAANGG	GCAActGTAc-AAaAACAAAAGG	3	34973704	-	4	1
RNA	GCAATAGTATGAACAACAAANGG	GCAgTAtTAT-cACAAtAAATGG	3	38199565	+	4	1
RNA	GCAATAGTATGAACAACAAANGG	GCAgTAtTAT-cACAAtAAATGG	3	39376997	+	4	1
RNA	GCAATAGTATGAACAACAAANGG	GCAgTAtTAT-cACAAtAAATGG	3	41688562	+	4	1
RNA	GCAATAGTATGAACAACAAANGG	aCAATAcTAT-AACAAaAtATGG	3	48769415	+	4	1
RNA	GCAATAGTATGAACAACAAANGG	GtAATAGTAT-AAaAAaAtAAGG	3	51419521	+	4	1
RNA	GCAATAGTATGAACAACAAANGG	GCAATccTAc-AACAAaAAAGGG	3	53453235	+	4	1
RNA	GCAATAGTATGAACAACAAANGG	aaAATAGTAT-AACAAgAgATGG	3	54283265	+	4	1
RNA	GCAATAGTATGAACAACAAANGG	GCAgTAtTAT-cACAAtAAATGG	4	455489	+	4	1
RNA	GCAATAGTATGAACAACAAANGG	GCAgTAtTAT-cACAAaAAATGG	4	3377857	+	4	1
RNA	GCAATAGTATGAACAACAAANGG	GCAgTAtTAT-cACAAaAAATGG	4	4998615	+	4	1
RNA	GCAATAGTATGAACAACAAANGG	GCAgTAtTAT-cACAAaAAATGG	4	4993700	-	4	1
RNA	GCAATAGTATGAACAACAAANGG	tatATAGTAT-AACAtCAAAAGG	4	6185863	-	4	1
RNA	GCAATAGTATGAACAACAAANGG	agAATAGTAT-AAtAAtAAATGG	4	6725422	+	4	1
RNA	GCAATAGTATGAACAACAAANGG	GgAA-AGctTGAAgAACAAAAGG	scaffold1200	511	+	4	1
RNA	GCAATAGTATGAACAACAAANGG	cagA-AGTATGAACAgCAAAGGG	scaffold0865	4637	+	4	1
RNA	GCAATAGTATGAACAACAAANGG	GCAA-AGgATaAcCtACAAAAGG	scaffold0264	14055	-	4	1
RNA	GCAATAGTATGAACAACAAANGG	cCAA-AGTtTGcACcACAAATGG	scaffold0118	12942	+	4	1
RNA	GCAATAGTATGAACAACAAANGG	GgAA-AtTATGActAACAAAAGG	scaffold0029	85530	-	4	1
RNA	GCAATAGTATGAACAACAAANGG	GCAA-AGcAgGAACAACAttTGG	scaffold0003	133205	+	4	1
RNA	GCAATAGTATGAACAACAAANGG	agAA-tGTcTGAACAACAAAAGG	scaffold0001	393226	+	4	1
RNA	GCAATAGTATGAACAACAAANGG	GaAA-AaTtTGAcCAACAAATGG	6	2481479	-	4	1
RNA	GCAATAGTATGAACAACAAANGG	GtAA-AGgATGAAaAtCAAAGGG	6	3628712	+	4	1
RNA	GCAATAGTATGAACAACAAANGG	GCAg-AGgAgGAAgAACAAAAGG	6	13079928	-	4	1
RNA	GCAATAGTATGAACAACAAANGG	GaAA-AtTATGgAaAACAAAGGG	6	15652701	+	4	1
RNA	GCAATAGTATGAACAACAAANGG	GgAA-AtTATGgAaAACAAAGGG	6	15670534	+	4	1
RNA	GCAATAGTATGAACAACAAANGG	GaAA-AtTATGgAaAACAAAGGG	6	15887899	-	4	1
RNA	GCAATAGTATGAACAACAAANGG	GaAA-AtTATGgAaAACAAAGGG	6	15888330	-	4	1
RNA	GCAATAGTATGAACAACAAANGG	GgAt-AGTATGAACAAtcAAAGG	6	16446053	+	4	1
RNA	GCAATAGTATGAACAACAAANGG	GCAc-AtTATtAAgAACAAAGGG	6	20990414	-	4	1
RNA	GCAATAGTATGAACAACAAANGG	GaAA-AGTgTGAAaAAtAAAGGG	6	28105870	+	4	1
RNA	GCAATAGTATGAACAACAAANGG	cCAA-AaTATtAACAAaAAATGG	6	28980072	-	4	1
RNA	GCAATAGTATGAACAACAAANGG	GCAc-AtTATtAAgAACAAAGGG	6	31129722	-	4	1
RNA	GCAATAGTATGAACAACAAANGG	tCAA-AGcATaAACcACAAAAGG	5	1451585	+	4	1
RNA	GCAATAGTATGAACAACAAANGG	GCAA-ccaATGAACAAtAAAAGG	5	3765550	+	4	1
RNA	GCAATAGTATGAACAACAAANGG	GCAA-AtTATtAtaAACAAAAGG	5	5516851	+	4	1
RNA	GCAATAGTATGAACAACAAANGG	GtAA-AGTATaAAaAACgAAAGG	5	6515960	+	4	1
RNA	GCAATAGTATGAACAACAAANGG	tCAA-AaTATGAACAACAtgAGG	5	6472200	-	4	1
RNA	GCAATAGTATGAACAACAAANGG	GCAA-AGTtTGAAgAAatAAAGG	5	7248189	+	4	1
RNA	GCAATAGTATGAACAACAAANGG	GCAA-AtgcTGcACAACAAATGG	5	8918504	-	4	1
RNA	GCAATAGTATGAACAACAAANGG	GaAA-AtTATGAACAAatAAAGG	5	9158653	-	4	1
RNA	GCAATAGTATGAACAACAAANGG	aCAA-AGTgTaAACAAaAAATGG	5	10164036	-	4	1
RNA	GCAATAGTATGAACAACAAANGG	GCAA-AaTATaAAaAAtAAAGGG	5	12461626	-	4	1
RNA	GCAATAGTATGAACAACAAANGG	tCAA-AaTATGAAaAACAcATGG	5	13120040	-	4	1
RNA	GCAATAGTATGAACAACAAANGG	GCtA-tGaATGAACAACtAAAGG	5	13744863	+	4	1
RNA	GCAATAGTATGAACAACAAANGG	aCtA-AcaATGAACAACAAAGGG	5	14097585	-	4	1
RNA	GCAATAGTATGAACAACAAANGG	GtAA-AGTATGAAacACAAtAGG	5	14926250	-	4	1
RNA	GCAATAGTATGAACAACAAANGG	GatA-gGTATcAACAACAAAAGG	5	15919580	+	4	1
RNA	GCAATAGTATGAACAACAAANGG	GCAA-AGcATGgAaAtCAAATGG	5	16026239	-	4	1
RNA	GCAATAGTATGAACAACAAANGG	GCtA-AGcATGAtCAtCAAAAGG	5	16180266	-	4	1
RNA	GCAATAGTATGAACAACAAANGG	GCAA-AtTcTGAtCAACcAAGGG	5	18571709	+	4	1
RNA	GCAATAGTATGAACAACAAANGG	GCAA-AaaATaAACAACAgAAGG	5	19695858	+	4	1
RNA	GCAATAGTATGAACAACAAANGG	GtAA-AaTtTGAAgAACAAAAGG	5	20847313	+	4	1
RNA	GCAATAGTATGAACAACAAANGG	GtAA-AaTtTGAAaAACAAAAGG	5	20853680	+	4	1
RNA	GCAATAGTATGAACAACAAANGG	GCAA-taTATGcACcACAAAGGG	5	22700503	+	4	1
RNA	GCAATAGTATGAACAACAAANGG	GCtA-AGagTGgACAACAAAGGG	5	27623707	-	4	1
RNA	GCAATAGTATGAACAACAAANGG	GCtA-AGTtTGAAaAACtAAAGG	5	29201750	+	4	1
RNA	GCAATAGTATGAACAACAAANGG	tCAA-AGTATaAACtAtAAATGG	5	33080741	+	4	1
RNA	GCAATAGTATGAACAACAAANGG	GaAA-tGTATGAAaAAaAAAGGG	5	33978262	+	4	1
RNA	GCAATAGTATGAACAACAAANGG	GCAA-AGcATtAAtAAaAAAGGG	5	34857605	-	4	1
RNA	GCAATAGTATGAACAACAAANGG	tCAA-AGTAcaAACAAtAAATGG	5	41468448	+	4	1
RNA	GCAATAGTATGAACAACAAANGG	tCAA-AGTATaAAtAAtAAATGG	5	41514019	+	4	1
RNA	GCAATAGTATGAACAACAAANGG	taAA-AGTAgGgACAACAAATGG	5	42094451	+	4	1
RNA	GCAATAGTATGAACAACAAANGG	GCAc-AtTATtAAgAACAAAGGG	8	602291	+	4	1
RNA	GCAATAGTATGAACAACAAANGG	GCAA-AGTATGgcaAtCAAAGGG	8	2187669	+	4	1
RNA	GCAATAGTATGAACAACAAANGG	GCAt-AGTAgGAAtAACAgAAGG	8	4077956	+	4	1
RNA	GCAATAGTATGAACAACAAANGG	GgAA-AaTATGtACAAaAAAGGG	8	4032782	-	4	1
RNA	GCAATAGTATGAACAACAAANGG	tCAA-AaTATGAAgAcCAAAAGG	8	4255301	-	4	1
RNA	GCAATAGTATGAACAACAAANGG	aCAA-AaaATGAACcACAAAAGG	8	5093053	-	4	1
RNA	GCAATAGTATGAACAACAAANGG	aaAA-AaTATGAACAAaAAAAGG	8	5246709	-	4	1
RNA	GCAATAGTATGAACAACAAANGG	GCAc-AtTATtAAgAACAAAGGG	8	7263736	+	4	1
RNA	GCAATAGTATGAACAACAAANGG	GgAA-tGgATGAtCAACAAAGGG	8	7157528	-	4	1
RNA	GCAATAGTATGAACAACAAANGG	GaAA-AGaATGAAgAAgAAAAGG	8	9310129	+	4	1
RNA	GCAATAGTATGAACAACAAANGG	GCAA-AtTATcAcaAACAAAAGG	8	10273162	-	4	1
RNA	GCAATAGTATGAACAACAAANGG	GCAA-AtTATcAcaAACAAAAGG	8	10265465	-	4	1
RNA	GCAATAGTATGAACAACAAANGG	GaAA-AtTATGgAaAACAAAGGG	8	21581205	+	4	1
RNA	GCAATAGTATGAACAACAAANGG	GaAA-AGgAaGAAaAACAAAGGG	8	23489368	+	4	1
RNA	GCAATAGTATGAACAACAAANGG	GCAA-AGaATGgcaAACAAATGG	8	26204771	-	4	1
RNA	GCAATAGTATGAACAACAAANGG	GCAA-AtcATGAAgAAgAAATGG	8	27863003	+	4	1
RNA	GCAATAGTATGAACAACAAANGG	GCAA-AtcATGAAgAAgAAATGG	8	27969864	+	4	1
RNA	GCAATAGTATGAACAACAAANGG	GCAA-AGaATGgcaAACAAATGG	8	29627816	-	4	1
RNA	GCAATAGTATGAACAACAAANGG	tCAA-AGTATGcAttACAAACGG	8	35027729	-	4	1
RNA	GCAATAGTATGAACAACAAANGG	GCAA-AtgATcAACAACcAAAGG	8	37876792	+	4	1
RNA	GCAATAGTATGAACAACAAANGG	GCAA-AGcATGgAtcACAAATGG	8	40501040	+	4	1
RNA	GCAATAGTATGAACAACAAANGG	cCAA-AGgATaAACAAgAAAAGG	8	40328974	-	4	1
RNA	GCAATAGTATGAACAACAAANGG	GCAA-AGTgTGgAgAAgAAAAGG	8	42420770	+	4	1
RNA	GCAATAGTATGAACAACAAANGG	aaAA-AGTATGtACAAaAAAGGG	8	42607820	-	4	1
RNA	GCAATAGTATGAACAACAAANGG	GCAA-AGTATGggCAtCAcAAGG	8	44771168	+	4	1
RNA	GCAATAGTATGAACAACAAANGG	GCAA-AGTgTGcAaAAaAAAAGG	2	1999010	+	4	1
RNA	GCAATAGTATGAACAACAAANGG	aCcA-AGcATGAcCAACAAAGGG	2	1676999	-	4	1
RNA	GCAATAGTATGAACAACAAANGG	GCAc-AtTATtAAgAACAAAGGG	2	2554033	-	4	1
RNA	GCAATAGTATGAACAACAAANGG	GCcA-ctTATGAACAAaAAACGG	2	5245773	-	4	1
RNA	GCAATAGTATGAACAACAAANGG	GCAA-AGTAgGAACtgaAAAAGG	2	5993314	+	4	1
RNA	GCAATAGTATGAACAACAAANGG	GCcA-AGTtTGAACtgCAAAAGG	2	7896782	+	4	1
RNA	GCAATAGTATGAACAACAAANGG	GCAg-AGTtTGAACAAaAgATGG	2	7690016	-	4	1
RNA	GCAATAGTATGAACAACAAANGG	tCAA-AaTATGcACAAtAAAAGG	2	10861519	-	4	1
RNA	GCAATAGTATGAACAACAAANGG	tgAA-AGTATaAAaAACAAACGG	2	11921259	-	4	1
RNA	GCAATAGTATGAACAACAAANGG	GCAt-tGTATGgACcACAAACGG	2	12456119	+	4	1
RNA	GCAATAGTATGAACAACAAANGG	GCAA-AGgATGAAaAAatAAGGG	2	14653684	+	4	1
RNA	GCAATAGTATGAACAACAAANGG	GCAA-AGTATagcgAACAAACGG	2	19153995	+	4	1
RNA	GCAATAGTATGAACAACAAANGG	GaAA-AGaATGcAaAACAAAAGG	2	20219394	+	4	1
RNA	GCAATAGTATGAACAACAAANGG	GCAA-AtTATtAggAACAAAGGG	2	22576088	+	4	1
RNA	GCAATAGTATGAACAACAAANGG	tCAA-tGTATGAACcACAcAAGG	2	29827039	-	4	1
RNA	GCAATAGTATGAACAACAAANGG	ctAA-AGTATGAAgAcCAAAAGG	2	30436733	+	4	1
RNA	GCAATAGTATGAACAACAAANGG	GCAA-taTATGcACcACAAAGGG	2	33238353	-	4	1
RNA	GCAATAGTATGAACAACAAANGG	GCAA-taTATGcACcACAAAGGG	2	33246274	-	4	1
RNA	GCAATAGTATGAACAACAAANGG	GCAA-AGTATaAACAcCAggAGG	2	35936505	-	4	1
RNA	GCAATAGTATGAACAACAAANGG	GCAA-AGTATGgcaAtCAAAGGG	2	36649701	-	4	1
RNA	GCAATAGTATGAACAACAAANGG	GCAA-AcTAacAAgAACAAAGGG	2	38508030	-	4	1
RNA	GCAATAGTATGAACAACAAANGG	GCAg-AGagaGAACAACAAAGGG	2	40813884	-	4	1
RNA	GCAATAGTATGAACAACAAANGG	GCAc-AtTATtAAgAACAAAGGG	2	41826068	+	4	1
RNA	GCAATAGTATGAACAACAAANGG	GCAA-AaTATGAtCAAatAAAGG	2	44936003	+	4	1
RNA	GCAATAGTATGAACAACAAANGG	GaAA-AagATaAACAACAAAAGG	7	11721831	+	4	1
RNA	GCAATAGTATGAACAACAAANGG	GCAc-AtTATtAAgAACAAAGGG	7	13754092	-	4	1
RNA	GCAATAGTATGAACAACAAANGG	GCAg-AGTtTGAACAAaAgATGG	7	16433494	+	4	1
RNA	GCAATAGTATGAACAACAAANGG	GCAc-AtTATtAAgAACAAAGGG	7	18667345	-	4	1
RNA	GCAATAGTATGAACAACAAANGG	GagA-AGTtgGAACAACAAATGG	7	22124322	+	4	1
RNA	GCAATAGTATGAACAACAAANGG	tCAA-AGTtTGAACctCAAACGG	7	22156827	-	4	1
RNA	GCAATAGTATGAACAACAAANGG	tCAA-AGTtTGAACctCAAACGG	7	22215535	-	4	1
RNA	GCAATAGTATGAACAACAAANGG	GgAA-AtTATGAACAttAAAAGG	7	28018005	+	4	1
RNA	GCAATAGTATGAACAACAAANGG	GCAA-caTATGAACAAgAgAAGG	7	33442728	-	4	1
RNA	GCAATAGTATGAACAACAAANGG	tCAA-AGcAaGAAaAACAAAGGG	7	34023241	+	4	1
RNA	GCAATAGTATGAACAACAAANGG	GCAc-AtTATtAAgAACAAAGGG	7	35478081	+	4	1
RNA	GCAATAGTATGAACAACAAANGG	aCAA-AGcATGAAgAAtAAAAGG	7	37388107	+	4	1
RNA	GCAATAGTATGAACAACAAANGG	GaAA-AaTATGgAgAACAAACGG	7	37679746	-	4	1
RNA	GCAATAGTATGAACAACAAANGG	GCAA-AGTAacAAaAAaAAAAGG	7	37694806	-	4	1
RNA	GCAATAGTATGAACAACAAANGG	GCAA-AGTgTGAtCcACAAcAGG	7	40115501	-	4	1
RNA	GCAATAGTATGAACAACAAANGG	GagA-AGTtgGAACAACAAATGG	7	40557523	+	4	1
RNA	GCAATAGTATGAACAACAAANGG	GaAA-AGTATaAAaAAaAAAGGG	7	42391083	+	4	1
RNA	GCAATAGTATGAACAACAAANGG	cgAA-AGTATaAAaAACAAATGG	7	42295233	-	4	1
RNA	GCAATAGTATGAACAACAAANGG	GCcA-tGTtTGAACAACAcATGG	1	3442852	+	4	1
RNA	GCAATAGTATGAACAACAAANGG	GCcA-tGTtTGAACAACAcATGG	1	3403944	-	4	1
RNA	GCAATAGTATGAACAACAAANGG	GCAc-AaTATcAACAACAAcAGG	1	3888652	-	4	1
RNA	GCAATAGTATGAACAACAAANGG	GCAg-AGTtTGAACAAaAgATGG	1	6190121	+	4	1
RNA	GCAATAGTATGAACAACAAANGG	GCAA-tGTcTGAAgAAgAAAAGG	1	7540221	-	4	1
RNA	GCAATAGTATGAACAACAAANGG	aCAA-AGaATGAACAAgtAAGGG	1	14583862	-	4	1
RNA	GCAATAGTATGAACAACAAANGG	aCAA-AGggTcAACAACAAAGGG	1	19984590	+	4	1
RNA	GCAATAGTATGAACAACAAANGG	GaAA-AGTATGtACAAgAgAGGG	1	23928736	-	4	1
RNA	GCAATAGTATGAACAACAAANGG	GCAA-AtTAgGAACAAtAgAGGG	1	24288373	-	4	1
RNA	GCAATAGTATGAACAACAAANGG	tCAA-cGgATGtACAACAAAAGG	1	26665607	+	4	1
RNA	GCAATAGTATGAACAACAAANGG	tgAA-AGTATGAAaAACAAtTGG	1	28832492	-	4	1
RNA	GCAATAGTATGAACAACAAANGG	GCAA-AGcATGgAtcACAAATGG	1	29498439	-	4	1
RNA	GCAATAGTATGAACAACAAANGG	aCAA-AGTAcaAACAACAcACGG	1	30058024	+	4	1
RNA	GCAATAGTATGAACAACAAANGG	cCAA-AaTATaAACAAaAAATGG	1	29846717	-	4	1
RNA	GCAATAGTATGAACAACAAANGG	GCAA-gGaAaGAAaAACAAACGG	1	31891595	+	4	1
RNA	GCAATAGTATGAACAACAAANGG	GCAA-taTATGcACcACAAAGGG	1	33467362	-	4	1
RNA	GCAATAGTATGAACAACAAANGG	GCAA-taTATGcACcACAAAGGG	1	33477414	-	4	1
RNA	GCAATAGTATGAACAACAAANGG	GCAA-taTATGcACcACAAAGGG	1	34506552	-	4	1
RNA	GCAATAGTATGAACAACAAANGG	GCAA-AtTgatAACAACAAAGGG	1	36785607	+	4	1
RNA	GCAATAGTATGAACAACAAANGG	GCAA-AGTgTGAgaAACAAgAGG	1	37462014	+	4	1
RNA	GCAATAGTATGAACAACAAANGG	GCAA-AaTAgaAAaAACAAAAGG	1	39312223	-	4	1
RNA	GCAATAGTATGAACAACAAANGG	GCAA-ttTAgGAACAAtAAAAGG	1	40171821	+	4	1
RNA	GCAATAGTATGAACAACAAANGG	GCAA-AGaATGAAagAaAAAAGG	1	41626262	+	4	1
RNA	GCAATAGTATGAACAACAAANGG	GCAA-AcTcaGAACAACAtATGG	1	42280950	+	4	1
RNA	GCAATAGTATGAACAACAAANGG	GaAA-AaTtTGAcCAACAAATGG	1	44680935	+	4	1
RNA	GCAATAGTATGAACAACAAANGG	tCAA-AGatTcAACAACAAAAGG	1	44907387	-	4	1
RNA	GCAATAGTATGAACAACAAANGG	tCAA-AGTAatAACAtCAAATGG	1	45000325	-	4	1
RNA	GCAATAGTATGAACAACAAANGG	GtAA-AGTATattCAACAAATGG	1	47901310	+	4	1
RNA	GCAATAGTATGAACAACAAANGG	caAA-AaTATGAACAAaAAACGG	1	50691238	-	4	1
RNA	GCAATAGTATGAACAACAAANGG	GCAA-AtTATtAtaAACAAAAGG	1	51724991	-	4	1
RNA	GCAATAGTATGAACAACAAANGG	GCAA-AtTATtAtaAACAAAAGG	1	51728842	-	4	1
RNA	GCAATAGTATGAACAACAAANGG	tCAA-gGTATGtAgAACAAATGG	1	52243075	+	4	1
RNA	GCAATAGTATGAACAACAAANGG	GaAA-AaTAgGAACAAtAAAAGG	3	2891719	+	4	1
RNA	GCAATAGTATGAACAACAAANGG	cagA-AGTATGAACAgCAAAGGG	3	6498635	+	4	1
RNA	GCAATAGTATGAACAACAAANGG	GCAA-AGTtTGtACAAtAAgAGG	3	7969220	+	4	1
RNA	GCAATAGTATGAACAACAAANGG	catA-AGTATGAACAgCAAAGGG	3	9991569	+	4	1
RNA	GCAATAGTATGAACAACAAANGG	aaAA-AGaATGAAaAACAAAGGG	3	10965415	+	4	1
RNA	GCAATAGTATGAACAACAAANGG	aaAA-AGaATGAAaAACAAAGGG	3	10961906	+	4	1
RNA	GCAATAGTATGAACAACAAANGG	cCAA-AaTATGcACAtCAAAGGG	3	16941708	+	4	1
RNA	GCAATAGTATGAACAACAAANGG	tCAA-AtaATGAAaAACAAAGGG	3	21462189	+	4	1
RNA	GCAATAGTATGAACAACAAANGG	tCAA-AGgATGAtaAACAAAAGG	3	23016870	+	4	1
RNA	GCAATAGTATGAACAACAAANGG	GCAA-AGgATtAtaAACAAAAGG	3	23145728	+	4	1
RNA	GCAATAGTATGAACAACAAANGG	GCAc-AtTATtAAgAACAAAGGG	3	24927954	+	4	1
RNA	GCAATAGTATGAACAACAAANGG	GaAA-AtTATGgAaAACAAAGGG	3	32963325	+	4	1
RNA	GCAATAGTATGAACAACAAANGG	taAA-AtTAaGAACAACAAAGGG	3	34412752	+	4	1
RNA	GCAATAGTATGAACAACAAANGG	GCtt-AGTcTtAACAACAAAAGG	3	34601921	-	4	1
RNA	GCAATAGTATGAACAACAAANGG	GCcA-AaTATGAACAtCAAcAGG	3	40106894	+	4	1
RNA	GCAATAGTATGAACAACAAANGG	tCAA-gGTATccACAACAAATGG	3	43147093	-	4	1
RNA	GCAATAGTATGAACAACAAANGG	GCAA-AacAgaAACAACAAAAGG	3	43697817	+	4	1
RNA	GCAATAGTATGAACAACAAANGG	GCAt-AagATGAACAAgAAAAGG	3	44535427	+	4	1
RNA	GCAATAGTATGAACAACAAANGG	GCAA-AGgAgtAtCAACAAATGG	3	48730281	+	4	1
RNA	GCAATAGTATGAACAACAAANGG	agAA-tGTATGAACAACAgACGG	3	49248290	+	4	1
RNA	GCAATAGTATGAACAACAAANGG	tCAA-AGgAcGAAaAACAAATGG	3	54110492	+	4	1
RNA	GCAATAGTATGAACAACAAANGG	GtAA-AaTAgGAAgAACAAATGG	3	54924640	+	4	1
RNA	GCAATAGTATGAACAACAAANGG	GgAA-AaTATGAACAcCAAgAGG	4	5263771	+	4	1
RNA	GCAATAGTATGAACAACAAANGG	tCAAT-GTATGAACAAgAgtGGG	scaffold1482	1661	+	4	1
RNA	GCAATAGTATGAACAACAAANGG	GCcAT-cTtTGAAaAACAAAAGG	scaffold0524	76	+	4	1
RNA	GCAATAGTATGAACAACAAANGG	GCAAT-GcATGAAgAgCAtATGG	scaffold0479	565	+	4	1
RNA	GCAATAGTATGAACAACAAANGG	GCAAT-GaAgaAACAACAAgAGG	scaffold0422	12793	-	4	1
RNA	GCAATAGTATGAACAACAAANGG	GCAAT-GaATGAACcACttATGG	scaffold0372	7239	-	4	1
RNA	GCAATAGTATGAACAACAAANGG	GaAAT-aTATGgACAACAAtTGG	scaffold0002	342229	-	4	1
RNA	GCAATAGTATGAACAACAAANGG	aCAAT-GcATGAAaAAaAAAAGG	6	743390	-	4	1
RNA	GCAATAGTATGAACAACAAANGG	GCAAa-GTATacACAAtAAAAGG	6	5012063	+	4	1
RNA	GCAATAGTATGAACAACAAANGG	GCcAT-GTATGAACAtgcAAAGG	6	6481622	+	4	1
RNA	GCAATAGTATGAACAACAAANGG	GCcAT-GTATGAACAtgcAAAGG	6	6493043	+	4	1
RNA	GCAATAGTATGAACAACAAANGG	tCAAT-GTtccAACAACAAATGG	6	10306523	-	4	1
RNA	GCAATAGTATGAACAACAAANGG	GCAAT-GTAgtAttAACAAAGGG	6	13628239	+	4	1
RNA	GCAATAGTATGAACAACAAANGG	cCAAT-GTtTGcACAAaAAAGGG	6	17943712	+	4	1
RNA	GCAATAGTATGAACAACAAANGG	aCAAT-catTGAACAACAAAAGG	6	27599520	+	4	1
RNA	GCAATAGTATGAACAACAAANGG	cCAAT-cTATGgACAAgAAAAGG	6	30529856	+	4	1
RNA	GCAATAGTATGAACAACAAANGG	GCAgT-GTATcAgCAAaAAAAGG	6	32931685	+	4	1
RNA	GCAATAGTATGAACAACAAANGG	GCAAc-caATGAACAAtAAAAGG	5	3765550	+	4	1
RNA	GCAATAGTATGAACAACAAANGG	GCcAT-GTATaAAtAAaAAATGG	5	6825349	+	4	1
RNA	GCAATAGTATGAACAACAAANGG	GtAAT-GTATaAACAAaAcAAGG	5	7991091	-	4	1
RNA	GCAATAGTATGAACAACAAANGG	GCAtT-GTtTaAgCAACAAAAGG	5	11712845	-	4	1
RNA	GCAATAGTATGAACAACAAANGG	GatAg-GTATcAACAACAAAAGG	5	15919580	+	4	1
RNA	GCAATAGTATGAACAACAAANGG	GCAAT-tTcTGAAgAAaAAATGG	5	18462612	-	4	1
RNA	GCAATAGTATGAACAACAAANGG	GgAtT-GTATGAACAAtcAACGG	5	24204238	+	4	1
RNA	GCAATAGTATGAACAACAAANGG	GCAAT-GcATGAAgAgCAgATGG	5	33814465	+	4	1
RNA	GCAATAGTATGAACAACAAANGG	GgAAT-GaATGAAaAAgAAATGG	5	33820891	-	4	1
RNA	GCAATAGTATGAACAACAAANGG	GaAAa-aTATGAAaAACAAAGGG	5	35612506	+	4	1
RNA	GCAATAGTATGAACAACAAANGG	GCttT-GaATGtACAACAAAAGG	5	40779904	+	4	1
RNA	GCAATAGTATGAACAACAAANGG	tCAAa-GTATaAACAAtAAATGG	5	41522983	+	4	1
RNA	GCAATAGTATGAACAACAAANGG	GCAAT-GTATtAACAcaAcATGG	5	43496038	-	4	1
RNA	GCAATAGTATGAACAACAAANGG	GCAAT-GTATtAACggtAAAAGG	8	1896773	+	4	1
RNA	GCAATAGTATGAACAACAAANGG	GtAAT-cTATGcACAgCAAATGG	8	5387156	-	4	1
RNA	GCAATAGTATGAACAACAAANGG	GgAAa-aTATGAACAtCAAAAGG	8	5909193	+	4	1
RNA	GCAATAGTATGAACAACAAANGG	GgAAT-GgAaGAtCAACAAAGGG	8	7150320	-	4	1
RNA	GCAATAGTATGAACAACAAANGG	GtAAT-GTATtAAaAtCAAATGG	8	8291352	+	4	1
RNA	GCAATAGTATGAACAACAAANGG	GCAAT-tcATGAAaAACAAgTGG	8	10590418	-	4	1
RNA	GCAATAGTATGAACAACAAANGG	aCAAT-GaAgGAACAAgAAAAGG	8	16895525	-	4	1
RNA	GCAATAGTATGAACAACAAANGG	GgAgT-GTtgGAACAACAAAAGG	8	24597572	-	4	1
RNA	GCAATAGTATGAACAACAAANGG	tCAAT-tTAaGAACAAgAAAGGG	8	27349927	-	4	1
RNA	GCAATAGTATGAACAACAAANGG	GCAAa-aaATGAACAAgAAACGG	8	29479233	-	4	1
RNA	GCAATAGTATGAACAACAAANGG	cgAAa-GTATGAtCAACAAACGG	8	34232671	-	4	1
RNA	GCAATAGTATGAACAACAAANGG	GCAAT-acATtAACAACAcATGG	8	37515163	+	4	1
RNA	GCAATAGTATGAACAACAAANGG	GCAAT-aTATGAACAtgAAgCGG	8	45535266	-	4	1
RNA	GCAATAGTATGAACAACAAANGG	GCcAc-tTATGAACAAaAAACGG	2	5245773	-	4	1
RNA	GCAATAGTATGAACAACAAANGG	cCAtT-GTATGAACAtaAAAAGG	2	6361082	-	4	1
RNA	GCAATAGTATGAACAACAAANGG	aCAAT-GTATaAAaAAtAAACGG	2	7011863	+	4	1
RNA	GCAATAGTATGAACAACAAANGG	tCAAT-cTAgaAACAACAAACGG	2	7618010	-	4	1
RNA	GCAATAGTATGAACAACAAANGG	GCcAT-GaATGAAaAgCAAAAGG	2	17190360	+	4	1
RNA	GCAATAGTATGAACAACAAANGG	GgAtT-GTATGAACAAtcAATGG	2	18965482	+	4	1
RNA	GCAATAGTATGAACAACAAANGG	GaAAT-caATGcACAACAAATGG	2	27659108	+	4	1
RNA	GCAATAGTATGAACAACAAANGG	GCAAa-GTAaGtACAACAAgTGG	2	31987483	-	4	1
RNA	GCAATAGTATGAACAACAAANGG	GCAtT-GTtaGAACAACAAcCGG	2	34344175	+	4	1
RNA	GCAATAGTATGAACAACAAANGG	tCAAT-tgtTGAACAACAAAAGG	2	35797398	+	4	1
RNA	GCAATAGTATGAACAACAAANGG	tatAT-GTAaGAACAACAAATGG	2	35881891	-	4	1
RNA	GCAATAGTATGAACAACAAANGG	tCAAa-GTATGAACAgCAAgAGG	2	37565745	+	4	1
RNA	GCAATAGTATGAACAACAAANGG	GCAAT-agAaGAgCAACAAAAGG	2	41477255	+	4	1
RNA	GCAATAGTATGAACAACAAANGG	GCAAT-agAgGAgCAACAAAAGG	2	41484261	+	4	1
RNA	GCAATAGTATGAACAACAAANGG	GCAAT-GgAaGActAACAAAAGG	2	42050617	+	4	1
RNA	GCAATAGTATGAACAACAAANGG	GCAAa-GTATGcACAAtAAgAGG	7	4516236	+	4	1
RNA	GCAATAGTATGAACAACAAANGG	GCAAT-GcATGAAgAgCAtATGG	7	4837863	-	4	1
RNA	GCAATAGTATGAACAACAAANGG	GaAAT-GTATGgAgAAtAAAGGG	7	6057049	-	4	1
RNA	GCAATAGTATGAACAACAAANGG	GgAAT-tTAgGAACAgCAAATGG	7	11754876	+	4	1
RNA	GCAATAGTATGAACAACAAANGG	tCAAT-GTATGAAaAgaAAAAGG	7	15109578	+	4	1
RNA	GCAATAGTATGAACAACAAANGG	ttAAT-GTATGcACAACAcATGG	7	15318434	+	4	1
RNA	GCAATAGTATGAACAACAAANGG	GgAtT-GTATGAACAAtcAATGG	7	24419198	+	4	1
RNA	GCAATAGTATGAACAACAAANGG	GgAAT-aTATGgACAtCAAATGG	7	29563861	-	4	1
RNA	GCAATAGTATGAACAACAAANGG	atAAT-aTATGAAaAACAAACGG	7	30707087	-	4	1
RNA	GCAATAGTATGAACAACAAANGG	tCAAT-GTATGAcaAACAAcTGG	7	32474864	+	4	1
RNA	GCAATAGTATGAACAACAAANGG	GtAAa-GTATcAACAAaAAAAGG	7	32714647	-	4	1
RNA	GCAATAGTATGAACAACAAANGG	GCAAc-aTATGAACAAgAgAAGG	7	33442728	-	4	1
RNA	GCAATAGTATGAACAACAAANGG	GCAtT-tTATcAACAtCAAAAGG	7	35386431	-	4	1
RNA	GCAATAGTATGAACAACAAANGG	GCAAT-GTAatAAaAAaAAAGGG	7	40957567	-	4	1
RNA	GCAATAGTATGAACAACAAANGG	tCAAT-GaAaGAACAACcAAAGG	7	41863959	+	4	1
RNA	GCAATAGTATGAACAACAAANGG	tCAAa-GaATGAAaAACAAACGG	7	41752205	-	4	1
RNA	GCAATAGTATGAACAACAAANGG	aCAAT-tTATGAAgAAaAAATGG	7	43451518	-	4	1
RNA	GCAATAGTATGAACAACAAANGG	GCAgT-tTgTGAAgAACAAAAGG	1	1421867	+	4	1
RNA	GCAATAGTATGAACAACAAANGG	GCAAT-ccggGAACAACAAAAGG	1	4944319	-	4	1
RNA	GCAATAGTATGAACAACAAANGG	GaAAT-tgATGAAgAACAAAAGG	1	12900177	+	4	1
RNA	GCAATAGTATGAACAACAAANGG	aCAAT-GaAgGAACAAgAAAAGG	1	15809478	+	4	1
RNA	GCAATAGTATGAACAACAAANGG	cCctT-GTATGAAaAACAAAAGG	1	15873132	+	4	1
RNA	GCAATAGTATGAACAACAAANGG	GaAAT-GTATGAgaAgCAAAGGG	1	21866133	-	4	1
RNA	GCAATAGTATGAACAACAAANGG	tCAAc-GgATGtACAACAAAAGG	1	26665607	+	4	1
RNA	GCAATAGTATGAACAACAAANGG	GaAAT-GaATaAACAAaAAAAGG	1	30011981	+	4	1
RNA	GCAATAGTATGAACAACAAANGG	GCAAT-GTgTGAACAAaAtcTGG	1	29830003	-	4	1
RNA	GCAATAGTATGAACAACAAANGG	GgAAT-GTATtAAgAAaAAATGG	1	30242065	+	4	1
RNA	GCAATAGTATGAACAACAAANGG	GCAAg-GaAaGAAaAACAAACGG	1	31891595	+	4	1
RNA	GCAATAGTATGAACAACAAANGG	GCAAT-GgtTatACAACAAATGG	1	35331381	+	4	1
RNA	GCAATAGTATGAACAACAAANGG	GaAAT-GTATatAaAACAAAAGG	1	45766948	-	4	1
RNA	GCAATAGTATGAACAACAAANGG	aCAAa-aTATGAAaAACAAATGG	1	51734581	-	4	1
RNA	GCAATAGTATGAACAACAAANGG	tCAAg-GTATGtAgAACAAATGG	1	52243075	+	4	1
RNA	GCAATAGTATGAACAACAAANGG	GCcAT-GTAgaAACAACAAcAGG	3	1601576	+	4	1
RNA	GCAATAGTATGAACAACAAANGG	GCAAT-GcATGAAgAgCAtATGG	3	13563836	-	4	1
RNA	GCAATAGTATGAACAACAAANGG	GCAcT-tTATtAACAACAcATGG	3	14441003	+	4	1
RNA	GCAATAGTATGAACAACAAANGG	GCAAa-GgATGAcaAACAAAAGG	3	23139854	+	4	1
RNA	GCAATAGTATGAACAACAAANGG	GCAAa-GgATGAtaAACAAAAGG	3	23148566	+	4	1
RNA	GCAATAGTATGAACAACAAANGG	GCAAT-GgATttACAtCAAATGG	3	24143868	-	4	1
RNA	GCAATAGTATGAACAACAAANGG	GCAAT-aTATGAACAtgAAgTGG	3	24564176	+	4	1
RNA	GCAATAGTATGAACAACAAANGG	ttgAT-GgATGAACAACAAATGG	3	27979614	+	4	1
RNA	GCAATAGTATGAACAACAAANGG	GaAAa-tTATGAAaAACAAAGGG	3	36143912	-	4	1
RNA	GCAATAGTATGAACAACAAANGG	GgAgT-GTtgGAACAACAAAAGG	3	42586161	+	4	1
RNA	GCAATAGTATGAACAACAAANGG	tCAAg-GTATccACAACAAATGG	3	43147093	-	4	1
RNA	GCAATAGTATGAACAACAAANGG	aaAAT-GTgTGAAaAACAAAAGG	3	45702484	+	4	1
RNA	GCAATAGTATGAACAACAAANGG	GCAAT-GTAgtAAaAAaAAAAGG	3	47009541	+	4	1
RNA	GCAATAGTATGAACAACAAANGG	GCAAT-GaATGAAgtgCAAAAGG	3	48503323	+	4	1
RNA	GCAATAGTATGAACAACAAANGG	tCAAT-GcAaGgACAACAAATGG	3	49290069	+	4	1
RNA	GCAATAGTATGAACAACAAANGG	aCAAT-GaAgGAACAAgAAAAGG	3	52401358	-	4	1
RNA	GCAATAGTATGAACAACAAANGG	GtAAT-GaATGAAtAAgAAAAGG	3	55179560	+	4	1
RNA	GCAATAGTATGAACAACAAANGG	GgAAT-cTtTGAACgACAAAGGG	3	55359540	-	4	1
RNA	GCAATAGTATGAACAACAAANGG	ttAAT-GTATGtACAAgAAAAGG	4	42882	-	4	1
RNA	GCAATAGTATGAACAACAAANGG	tCAAT-cTATGAACAtCAAcTGG	4	682642	+	4	1
RNA	GCAATAGTATGAACAACAAANGG	GgAgT-GTtgGAACAACAAAAGG	4	2000095	+	4	1
RNA	GCAATAGTATGAACAACAAANGG	GaAAT-GTATaAAgAAaAAACGG	4	3142828	+	4	1
RNA	GCAATAGTATGAACAACAAANGG	GgAAa-GTAacAACAACAAAAGG	4	5262721	-	4	1
RNA	GCAATAGTATGAACAACAAANGG	GCcATAagA-GAACAACtAATGG	scaffold1787	869	-	4	1
RNA	GCAATAGTATGAACAACAAANGG	GCAATAtTA-tcACAAtAAATGG	scaffold0863	3379	-	4	1
RNA	GCAATAGTATGAACAACAAANGG	GtAcTAGTc-tAACAACAAATGG	scaffold0393	8317	+	4	1
RNA	GCAATAGTATGAACAACAAANGG	GaAATAGTA-GAttAACAcAAGG	scaffold0152	483	-	4	1
RNA	GCAATAGTATGAACAACAAANGG	GaAATAGTA-GAttAACAcAAGG	scaffold0152	8978	-	4	1
RNA	GCAATAGTATGAACAACAAANGG	GaAATAGTA-GAttAACAcAAGG	scaffold0152	4731	-	4	1
RNA	GCAATAGTATGAACAACAAANGG	GCAAaAcTA-GcACAACAAgCGG	scaffold0137	5463	-	4	1
RNA	GCAATAGTATGAACAACAAANGG	GCcATAagA-GAACAACtAATGG	scaffold0060	22732	-	4	1
RNA	GCAATAGTATGAACAACAAANGG	GCcATAagA-GAACAACtAATGG	scaffold0060	16804	-	4	1
RNA	GCAATAGTATGAACAACAAANGG	GCcATAagA-GAACAACtAAAGG	scaffold0060	10312	-	4	1
RNA	GCAATAGTATGAACAACAAANGG	GCAAgAGTA-GAggAAaAAAGGG	scaffold0009	69895	-	4	1
RNA	GCAATAGTATGAACAACAAANGG	GCAAaAGaA-aAACAcCAAACGG	scaffold0004	110382	+	4	1
RNA	GCAATAGTATGAACAACAAANGG	GCAATAtTA-acACAAtAAATGG	scaffold0004	7705	-	4	1
RNA	GCAATAGTATGAACAACAAANGG	GCAATAaaA-GtAaAACAAATGG	6	1330509	-	4	1
RNA	GCAATAGTATGAACAACAAANGG	tCAcaAGTA-GAACAAtAAAAGG	6	2646179	+	4	1
RNA	GCAATAGTATGAACAACAAANGG	GCAATAcTA-GtACAcaAAATGG	6	3167653	+	4	1
RNA	GCAATAGTATGAACAACAAANGG	GCAAaAGcA-GAACAACctAAGG	6	5494632	+	4	1
RNA	GCAATAGTATGAACAACAAANGG	GtgATgGTg-GAACAACAAAAGG	6	9997974	+	4	1
RNA	GCAATAGTATGAACAACAAANGG	GtgATgGTg-GAACAACAAAAGG	6	9990802	+	4	1
RNA	GCAATAGTATGAACAACAAANGG	GCAATAGcA-tAAtAAaAAATGG	6	13791706	-	4	1
RNA	GCAATAGTATGAACAACAAANGG	GCAATAGaA-tAAtAAaAAATGG	6	13805925	-	4	1
RNA	GCAATAGTATGAACAACAAANGG	GCAATAGaA-tAAtAAaAAATGG	6	13784339	-	4	1
RNA	GCAATAGTATGAACAACAAANGG	GtAATAGTA-GAggAAaAAATGG	6	19963942	+	4	1
RNA	GCAATAGTATGAACAACAAANGG	GCcATAagA-GAACAACgAATGG	6	21155808	+	4	1
RNA	GCAATAGTATGAACAACAAANGG	GCAAgAGTt-GtACAACgAAGGG	6	21983468	-	4	1
RNA	GCAATAGTATGAACAACAAANGG	aCAATcaTt-GAACAACAAAAGG	6	27599520	+	4	1
RNA	GCAATAGTATGAACAACAAANGG	cCAAaAGTA-GAtCAAtAAAAGG	6	33123977	+	4	1
RNA	GCAATAGTATGAACAACAAANGG	GgAATcGaA-GAACAtCAAATGG	6	34865444	+	4	1
RNA	GCAATAGTATGAACAACAAANGG	tCAATAGcA-GAAgAAaAAAAGG	6	34796371	-	4	1
RNA	GCAATAGTATGAACAACAAANGG	GaAATAGaA-GAACAAgcAATGG	5	1516638	-	4	1
RNA	GCAATAGTATGAACAACAAANGG	GgAATAGTg-GAACAtCAgATGG	5	3825538	-	4	1
RNA	GCAATAGTATGAACAACAAANGG	GaAATAGTA-aAAaAAgAAATGG	5	7248933	+	4	1
RNA	GCAATAGTATGAACAACAAANGG	GCAAgAGgc-GAACAACAAtTGG	5	6938338	-	4	1
RNA	GCAATAGTATGAACAACAAANGG	GCtcTAGTA-atACAACAAAAGG	5	18642780	-	4	1
RNA	GCAATAGTATGAACAACAAANGG	GaAATAGTA-GAttAACAcAAGG	5	21196727	-	4	1
RNA	GCAATAGTATGAACAACAAANGG	GCAATAtTA-tcACAAtAAATGG	5	21612580	-	4	1
RNA	GCAATAGTATGAACAACAAANGG	GCAATAtTA-aAACcAtAAATGG	5	29700001	+	4	1
RNA	GCAATAGTATGAACAACAAANGG	cagATAGTA-GAACAcCAAAAGG	5	30273486	+	4	1
RNA	GCAATAGTATGAACAACAAANGG	tCAgaAGTA-GAACAACAgAAGG	5	38880324	-	4	1
RNA	GCAATAGTATGAACAACAAANGG	GCAtTtGTA-GAAtAAgAAATGG	5	39330530	-	4	1
RNA	GCAATAGTATGAACAACAAANGG	GCAcaAGTA-aAAaAACAAATGG	5	41695846	-	4	1
RNA	GCAATAGTATGAACAACAAANGG	aCtgTAGTA-GAcCAACAAACGG	8	3438368	-	4	1
RNA	GCAATAGTATGAACAACAAANGG	tCtATAGTA-GAAaAACAAtTGG	8	6389117	+	4	1
RNA	GCAATAGTATGAACAACAAANGG	GgAATgGaA-GAtCAACAAAGGG	8	7150320	-	4	1
RNA	GCAATAGTATGAACAACAAANGG	GCtATAcTt-GcACAACAAATGG	8	8008616	+	4	1
RNA	GCAATAGTATGAACAACAAANGG	aCAATAGTA-tAACAAatAATGG	8	13363022	+	4	1
RNA	GCAATAGTATGAACAACAAANGG	GCAATAGcA-GAAagAaAAAAGG	8	25151070	-	4	1
RNA	GCAATAGTATGAACAACAAANGG	GtAATAGTA-GAAaAtaAAAGGG	8	30180058	+	4	1
RNA	GCAATAGTATGAACAACAAANGG	GCAATgGTA-cAAaAAaAAAAGG	8	36931859	+	4	1
RNA	GCAATAGTATGAACAACAAANGG	GCAATgGTg-GAACAAgAAgTGG	8	38196732	+	4	1
RNA	GCAATAGTATGAACAACAAANGG	GCAAaAtTA-aAACAAgAAATGG	8	38343156	+	4	1
RNA	GCAATAGTATGAACAACAAANGG	GtAATAGTA-GAtCAAgAgAAGG	2	4926889	-	4	1
RNA	GCAATAGTATGAACAACAAANGG	GCAAaAGTA-GAAaAgaAAATGG	2	8931580	-	4	1
RNA	GCAATAGTATGAACAACAAANGG	GCcATAacA-GAACAAtAAATGG	2	10935848	-	4	1
RNA	GCAATAGTATGAACAACAAANGG	GCAgTAaTA-aAtCAACAAAAGG	2	11677734	-	4	1
RNA	GCAATAGTATGAACAACAAANGG	GCAgTAaTA-aAtCAACAAAAGG	2	11695212	-	4	1
RNA	GCAATAGTATGAACAACAAANGG	GCAgTAGTg-GAAaAAgAAAAGG	2	13110978	+	4	1
RNA	GCAATAGTATGAACAACAAANGG	aCAATAcTA-GAAgAAaAAAAGG	2	14460589	+	4	1
RNA	GCAATAGTATGAACAACAAANGG	GCAATAGTA-GAAaAAggtATGG	2	17332870	+	4	1
RNA	GCAATAGTATGAACAACAAANGG	GaAATAaTA-GgACAAtAAAAGG	2	18015402	+	4	1
RNA	GCAATAGTATGAACAACAAANGG	GCAATAGcA-aAgCAACAAtGGG	2	20493913	+	4	1
RNA	GCAATAGTATGAACAACAAANGG	caAATAGTA-GAAaAACAAtAGG	2	23502074	+	4	1
RNA	GCAATAGTATGAACAACAAANGG	GCAATcaTA-tAACAACAAgAGG	2	33021110	-	4	1
RNA	GCAATAGTATGAACAACAAANGG	GCAtTgtTA-GAACAACAAcCGG	2	34344175	+	4	1
RNA	GCAATAGTATGAACAACAAANGG	GCAATgGaA-GActAACAAAAGG	2	42050617	+	4	1
RNA	GCAATAGTATGAACAACAAANGG	GCAATAtTA-tcACAAtAAATGG	7	16159190	-	4	1
RNA	GCAATAGTATGAACAACAAANGG	GtAgTAGTA-aAACAACAtATGG	7	19359979	-	4	1
RNA	GCAATAGTATGAACAACAAANGG	GCAgTAGcA-ccACAACAAAAGG	7	21846768	-	4	1
RNA	GCAATAGTATGAACAACAAANGG	GgAAgAGTg-GAAaAACAAAGGG	7	23026173	+	4	1
RNA	GCAATAGTATGAACAACAAANGG	GgAAgAGTg-GAAaAACAAAGGG	7	23034981	+	4	1
RNA	GCAATAGTATGAACAACAAANGG	GaAATAGTA-acAtAACAAATGG	7	25829563	-	4	1
RNA	GCAATAGTATGAACAACAAANGG	GaAATtGTA-GAACAAaAAtGGG	7	28862700	+	4	1
RNA	GCAATAGTATGAACAACAAANGG	aCAATAGaA-tAAgAACAAAGGG	7	42660393	-	4	1
RNA	GCAATAGTATGAACAACAAANGG	GCAATAGTA-acACAgaAAAAGG	7	45751894	+	4	1
RNA	GCAATAGTATGAACAACAAANGG	tCAAcAGTA-GAAgAAgAAAAGG	1	3495104	+	4	1
RNA	GCAATAGTATGAACAACAAANGG	GCAATccgg-GAACAACAAAAGG	1	4944319	-	4	1
RNA	GCAATAGTATGAACAACAAANGG	GCAtTgGTc-GAACAACAAgTGG	1	6697565	-	4	1
RNA	GCAATAGTATGAACAACAAANGG	atAATAGgA-GAACAAgAAATGG	1	7211424	-	4	1
RNA	GCAATAGTATGAACAACAAANGG	aCAAcAGTA-GAACcACAAcAGG	1	12692829	+	4	1
RNA	GCAATAGTATGAACAACAAANGG	tCAATtGTA-cAACAACAAgAGG	1	12684162	-	4	1
RNA	GCAATAGTATGAACAACAAANGG	GCcATAGTA-GAACAAtgtAAGG	1	14667815	+	4	1
RNA	GCAATAGTATGAACAACAAANGG	GCAATAtTA-tcACAAtAAATGG	1	21211624	-	4	1
RNA	GCAATAGTATGAACAACAAANGG	GCAgTAtTA-tAACAAtAAATGG	1	21130250	-	4	1
RNA	GCAATAGTATGAACAACAAANGG	GtAATtGTA-GAACttCAAAAGG	1	25288074	-	4	1
RNA	GCAATAGTATGAACAACAAANGG	GCAATgGTt-atACAACAAATGG	1	35331381	+	4	1
RNA	GCAATAGTATGAACAACAAANGG	tCAATAtTA-GAACAAacAATGG	1	39719614	+	4	1
RNA	GCAATAGTATGAACAACAAANGG	GaAATAGTA-aAAtAAtAAATGG	1	42201195	+	4	1
RNA	GCAATAGTATGAACAACAAANGG	GaAATAGTA-aAAtAAtAAATGG	1	42210063	+	4	1
RNA	GCAATAGTATGAACAACAAANGG	GaAATAGgA-aAACtACAAAAGG	1	44459459	-	4	1
RNA	GCAATAGTATGAACAACAAANGG	GCAATAaTA-aAAaAAaAAATGG	1	44957464	+	4	1
RNA	GCAATAGTATGAACAACAAANGG	agAAaAGTA-GAAaAACAAAGGG	1	46087046	+	4	1
RNA	GCAATAGTATGAACAACAAANGG	cCAAaAGTA-aAcCAACAAAAGG	1	47383214	-	4	1
RNA	GCAATAGTATGAACAACAAANGG	GCAAaAGaA-aAAaAACAAAGGG	1	50479194	+	4	1
RNA	GCAATAGTATGAACAACAAANGG	GCAATgaTA-GAAaAAgAAAGGG	1	51883774	+	4	1
RNA	GCAATAGTATGAACAACAAANGG	GCAATAGTA-cctCAACgAATGG	3	782550	+	4	1
RNA	GCAATAGTATGAACAACAAANGG	GCAAaAcTA-GcACAACAAgCGG	3	3899132	-	4	1
RNA	GCAATAGTATGAACAACAAANGG	atAATAaTA-GAACAAtAAAAGG	3	9327793	-	4	1
RNA	GCAATAGTATGAACAACAAANGG	GaAAcAGaA-GAACAAgAAAAGG	3	17716183	+	4	1
RNA	GCAATAGTATGAACAACAAANGG	cCAATgGTA-cAACAACAAgTGG	3	17470258	-	4	1
RNA	GCAATAGTATGAACAACAAANGG	GaAAcAGaA-GAACAAgAAAAGG	3	19017412	+	4	1
RNA	GCAATAGTATGAACAACAAANGG	GaAATAGcA-GAAttACAAAAGG	3	25810541	+	4	1
RNA	GCAATAGTATGAACAACAAANGG	GCAtTtGTA-GAACAACAttCGG	3	33987379	-	4	1
RNA	GCAATAGTATGAACAACAAANGG	GCAActGTA-cAAaAACAAAAGG	3	34973704	-	4	1
RNA	GCAATAGTATGAACAACAAANGG	taAATAGaA-GAAaAACAAACGG	3	37187771	-	4	1
RNA	GCAATAGTATGAACAACAAANGG	tCAAcAcaA-GAACAACAAATGG	3	38995528	+	4	1
RNA	GCAATAGTATGAACAACAAANGG	GCAATcGTg-GAAgAACAAgCGG	3	43179608	-	4	1
RNA	GCAATAGTATGAACAACAAANGG	GCAATcGTg-GAAgAACAAgCGG	3	43186774	-	4	1
RNA	GCAATAGTATGAACAACAAANGG	cCAATAaTA-GAcCAcCAAAAGG	3	49509040	-	4	1
RNA	GCAATAGTATGAACAACAAANGG	GCAgTtGTt-GAACAACAAgTGG	3	52601156	-	4	1
RNA	GCAATAGTATGAACAACAAANGG	GCAATccTA-cAACAAaAAAGGG	3	53453235	+	4	1
RNA	GCAATAGTATGAACAACAAANGG	GCAATtcTc-tAACAACAAAGGG	3	54788126	-	4	1
RNA	GCAATAGTATGAACAACAAANGG	GaAATccTA-GAAaAACAAAAGG	3	55207867	+	4	1
RNA	GCAATAGTATGAACAACAAANGG	aCAATAGgt-GAAaAACAAAAGG	3	55478143	-	4	1
RNA	GCAATAGTATGAACAACAAANGG	GCAATAGTt-GAAtAAgAcATGG	4	822659	+	4	1
RNA	GCAATAGTATGAACAACAAANGG	GCAccAGTc-GAACAAgAAATGG	4	6759410	+	4	1
RNA	GCAATAGTATGAACAACAAANGG	GCAATAtTATcAc-AAtAAATGG	scaffold0863	3379	-	4	1
RNA	GCAATAGTATGAACAACAAANGG	GtAATAtTATtAA-AAaAAAGGG	scaffold0597	6902	+	4	1
RNA	GCAATAGTATGAACAACAAANGG	GaAATAGTATGAA-AAacAtTGG	scaffold0567	7446	+	4	1
RNA	GCAATAGTATGAACAACAAANGG	GCtAaAGTAatAA-AACAAAAGG	scaffold0304	10310	-	4	1
RNA	GCAATAGTATGAACAACAAANGG	GCAATAtTATcAt-AAtAAATGG	scaffold0193	7706	+	4	1
RNA	GCAATAGTATGAACAACAAANGG	GCcATAaTgTGAA-AAaAAATGG	scaffold0182	4271	-	4	1
RNA	GCAATAGTATGAACAACAAANGG	GgAcTtGTATGAA-AAaAAAAGG	scaffold0166	29310	+	4	1
RNA	GCAATAGTATGAACAACAAANGG	GCAActGTtTcAA-AACAAAAGG	scaffold0102	24415	+	4	1
RNA	GCAATAGTATGAACAACAAANGG	GaAATAGTATGAA-AAacAtGGG	scaffold0059	64388	-	4	1
RNA	GCAATAGTATGAACAACAAANGG	GCtAaAaTAaGAA-AACAAAAGG	scaffold0040	38111	+	4	1
RNA	GCAATAGTATGAACAACAAANGG	GaAATAGTATGAA-AAacAtTGG	scaffold0038	109265	-	4	1
RNA	GCAATAGTATGAACAACAAANGG	GCAATAtTATcAt-AAtAAATGG	scaffold0018	2239	-	4	1
RNA	GCAATAGTATGAACAACAAANGG	tgtATAGaATGAA-AACAAAAGG	scaffold0014	78456	+	4	1
RNA	GCAATAGTATGAACAACAAANGG	cCAATgGTATGAA-cACtAAAGG	6	833774	+	4	1
RNA	GCAATAGTATGAACAACAAANGG	GCAATAaaAgtAA-AACAAATGG	6	1330509	-	4	1
RNA	GCAATAGTATGAACAACAAANGG	aCAAaAGTAacAA-AACAAAAGG	6	1744006	+	4	1
RNA	GCAATAGTATGAACAACAAANGG	GCAAaAGTcTGtA-AAtAAAGGG	6	3830081	+	4	1
RNA	GCAATAGTATGAACAACAAANGG	tttATAGTgTGAA-AACAAAAGG	6	4484826	-	4	1
RNA	GCAATAGTATGAACAACAAANGG	GCAATAaTATaAA-AACtcAGGG	6	5957578	-	4	1
RNA	GCAATAGTATGAACAACAAANGG	GaAcTAaTATGAA-AAtAAATGG	6	7238428	-	4	1
RNA	GCAATAGTATGAACAACAAANGG	atcATAGaATGAA-AACAAAAGG	6	9940103	-	4	1
RNA	GCAATAGTATGAACAACAAANGG	aaAATAGaATGAA-AAaAAAAGG	6	12981682	-	4	1
RNA	GCAATAGTATGAACAACAAANGG	GCAATAGcATaAt-AAaAAATGG	6	13791706	-	4	1
RNA	GCAATAGTATGAACAACAAANGG	GCAATAGaATaAt-AAaAAATGG	6	13805925	-	4	1
RNA	GCAATAGTATGAACAACAAANGG	GCAATAGaATaAt-AAaAAATGG	6	13784339	-	4	1
RNA	GCAATAGTATGAACAACAAANGG	GaAATAGTATGAA-AAacAtTGG	6	16276600	+	4	1
RNA	GCAATAGTATGAACAACAAANGG	GCcATAaTgTGAA-AAaAAATGG	6	22004642	-	4	1
RNA	GCAATAGTATGAACAACAAANGG	aCAgcAGaATGAA-AACAAAAGG	6	22495072	+	4	1
RNA	GCAATAGTATGAACAACAAANGG	GaAATAGTATGAA-AAacAtTGG	6	22827765	+	4	1
RNA	GCAATAGTATGAACAACAAANGG	GtAATAtTATtAA-AAaAAAAGG	6	23667096	+	4	1
RNA	GCAATAGTATGAACAACAAANGG	GgAATtGTATGAA-AAggAAAGG	6	27375274	-	4	1
RNA	GCAATAGTATGAACAACAAANGG	GgAATtGTATGAA-AAggAAAGG	6	27465631	-	4	1
RNA	GCAATAGTATGAACAACAAANGG	GaAATAGTATGAA-AAacAtTGG	6	28318159	-	4	1
RNA	GCAATAGTATGAACAACAAANGG	GCctTAaTATcAA-AACAAACGG	6	28893001	-	4	1
RNA	GCAATAGTATGAACAACAAANGG	tgtATAGaATGAA-AACAAAAGG	6	29484054	-	4	1
X	GCAATAGTATGAACAACAAANGG	GaAATAGTATGAAaAACAtgGGG	scaffold0059	64387	-	4	0
X	GCAATAGTATGAACAACAAANGG	GaAATAGTATGAAaAACAttGGG	scaffold0038	109264	-	4	0
X	GCAATAGTATGAACAACAAANGG	aCAATAGTATGAAtgAtAAAAGG	scaffold0004	114322	-	4	0
X	GCAATAGTATGAACAACAAANGG	aCAATAGTATGAAtgAtAAAAGG	6	14859992	+	4	0
X	GCAATAGTATGAACAACAAANGG	GgAATAaTtgGAACAACAAATGG	6	15284545	+	4	0
X	GCAATAGTATGAACAACAAANGG	GaAATAGTATGAAaAACAttGGG	6	16276600	+	4	0
X	GCAATAGTATGAACAACAAANGG	GggATAGTATGAACAAtcAAAGG	6	16446052	+	4	0
X	GCAATAGTATGAACAACAAANGG	GaAATAGTATGAAaAACAttGGG	6	22827765	+	4	0
X	GCAATAGTATGAACAACAAANGG	GaAATAGTATGAAaAACAttGGG	6	28318158	-	4	0
X	GCAATAGTATGAACAACAAANGG	GaAATtGTggGAACAACAAAAGG	6	30811994	-	4	0
X	GCAATAGTATGAACAACAAANGG	GCAATAGaAgGAAaAAaAAAAGG	5	4506938	-	4	0
X	GCAATAGTATGAACAACAAANGG	ctAATAtcATGAACAACAAATGG	5	7391571	-	4	0
X	GCAATAGTATGAACAACAAANGG	GaAATAcTATGcAaAACAAATGG	5	17591060	-	4	0
X	GCAATAGTATGAACAACAAANGG	GaAATAtTtTGAACAAtAAATGG	5	43241941	-	4	0
X	GCAATAGTATGAACAACAAANGG	GCAATAGTAaaAACAAaAAcTGG	8	961972	-	4	0
X	GCAATAGTATGAACAACAAANGG	GCAATAGcAgGAtCAAgAAAAGG	8	2396782	+	4	0
X	GCAATAGTATGAACAACAAANGG	GCAATtGgAgGAACAAgAAAAGG	8	3025223	+	4	0
X	GCAATAGTATGAACAACAAANGG	aCAATAGatTaAACAACAAAGGG	8	9861149	-	4	0
X	GCAATAGTATGAACAACAAANGG	GCAtcAGaATaAACAACAAAAGG	8	22372626	+	4	0
X	GCAATAGTATGAACAACAAANGG	GCAATgGTAaGAAaAgCAAAGGG	8	30929504	-	4	0
X	GCAATAGTATGAACAACAAANGG	tCgAaAGTATGAtCAACAAACGG	8	34232671	-	4	0
X	GCAATAGTATGAACAACAAANGG	GCAATAGTAaGAACAAgcAcAGG	8	45329734	-	4	0
X	GCAATAGTATGAACAACAAANGG	tCAATAcTATGAACAAatAAAGG	2	4002512	+	4	0
X	GCAATAGTATGAACAACAAANGG	GCtATtGTtTGAACAACtAAAGG	2	4667753	-	4	0
X	GCAATAGTATGAACAACAAANGG	GCtATtGTtTGAACAACtAAAGG	2	4664313	-	4	0
X	GCAATAGTATGAACAACAAANGG	GCAAgAaTATGAACAAaAAgGGG	2	7650494	-	4	0
X	GCAATAGTATGAACAACAAANGG	GCAATAtgAaGAACAAaAAAAGG	2	8733789	+	4	0
X	GCAATAGTATGAACAACAAANGG	GaAATAGTATGAAaAACAttGGG	2	19043239	-	4	0
X	GCAATAGTATGAACAACAAANGG	GaAATAGTATGAAaAACAttGGG	2	39836616	+	4	0
X	GCAATAGTATGAACAACAAANGG	GaAtTAtcATGAACAACAAAAGG	7	10601138	-	4	0
X	GCAATAGTATGAACAACAAANGG	GCAATAGaAaGAAaAAgAAAAGG	7	42289949	+	4	0
X	GCAATAGTATGAACAACAAANGG	GCAATtaaATGAACAcCAAAAGG	7	47101207	-	4	0
X	GCAATAGTATGAACAACAAANGG	GaAAgAGTATGtACAAtAAAAGG	1	3861601	-	4	0
X	GCAATAGTATGAACAACAAANGG	GaAtTcGTATGAACAAaAAAAGG	1	5689421	+	4	0
X	GCAATAGTATGAACAACAAANGG	GCAATAGTATcAACAAtAtgAGG	1	17223868	+	4	0
X	GCAATAGTATGAACAACAAANGG	GCAATAcTATGAgCgAaAAACGG	1	27971779	-	4	0
X	GCAATAGTATGAACAACAAANGG	GaAATAGTATGAAaAACAttGGG	1	29999261	+	4	0
X	GCAATAGTATGAACAACAAANGG	aCAATtGgATGAAgAACAAATGG	1	30207335	-	4	0
X	GCAATAGTATGAACAACAAANGG	GCAATAGTcTGctCcACAAAAGG	1	33250688	+	4	0
X	GCAATAGTATGAACAACAAANGG	GCAATAGTcTGctCcACAAAAGG	1	33270860	+	4	0
X	GCAATAGTATGAACAACAAANGG	cCAtTAGTtTGAAaAACAAAAGG	1	35145410	-	4	0
X	GCAATAGTATGAACAACAAANGG	GaAATAGTATGAAaAACAttGGG	1	40949048	-	4	0
X	GCAATAGTATGAACAACAAANGG	GCAgTAGTAgtAACAAgAAAAGG	1	42675001	+	4	0
X	GCAATAGTATGAACAACAAANGG	GtAATtGTAaGtACAACAAATGG	1	45187126	-	4	0
X	GCAATAGTATGAACAACAAANGG	aCAAaAaTATGAACAAaAAACGG	1	50691238	-	4	0
X	GCAATAGTATGAACAACAAANGG	aCAATAGTATcAACAAgtAATGG	3	1162905	+	4	0
X	GCAATAGTATGAACAACAAANGG	aCAtaAGTATGAACAgCAAAGGG	3	9991568	+	4	0
X	GCAATAGTATGAACAACAAANGG	GCAtcAGaATaAACAACAAAAGG	3	12179596	+	4	0
X	GCAATAGTATGAACAACAAANGG	GaAATAcTAcGAcCAACAAAAGG	3	13779302	+	4	0
X	GCAATAGTATGAACAACAAANGG	GaAATAGTATGAAaAACAttGGG	3	20931118	+	4	0
X	GCAATAGTATGAACAACAAANGG	GCAATAGctTaAAaAACAAATGG	3	37850383	-	4	0
X	GCAATAGTATGAACAACAAANGG	GaAATAGTATGAAaAACAttGGG	3	42397896	+	4	0
X	GCAATAGTATGAACAACAAANGG	GtAATAGTATtAAtAACtAAAGG	3	44025736	-	4	0
X	GCAATAGTATGAACAACAAANGG	GgAATAtTATcAACAAaAAATGG	3	46536120	-	4	0
X	GCAATAGTATGAACAACAAANGG	tCAAcAtTATGAAtAACAAATGG	3	47045827	+	4	0
X	GCAATAGTATGAACAACAAANGG	GCAATtGTATGctCAACAcATGG	4	17069466	-	4	0
X	GCAATAGTATGAACAACAAANGG	GCAATcccATGAACAACAtACGG	4	20982243	-	4	0
X	GCAATAGTATGAACAACAAANGG	GgAAgAtTAgGAACAACAAAAGG	4	33397339	+	4	0
X	GCAATAGTATGAACAACAAANGG	GCtATtGTATGAAaAACcAACGG	4	39166279	-	4	0
X	GCAATAGTATGAACAACAAANGG	GtAATAaaATGAAgAACAAAAGG	4	45248006	-	4	0
X	GCAATAGTATGAACAACAAANGG	GCAATAGTATaAACtACttACGG	4	45792050	-	4	0
X	GCAATAGTATGAACAACAAANGG	GCAATAccATGAACAAgAcATGG	4	53791527	+	4	0
X	GCAATAGTATGAACAACAAANGG	aCcATAGTATGAAggACAAAAGG	4	55964548	-	4	0
DNA	GCAATAGTATGAACAACAA-ANGG	GCAATAaaAaGAACAAaAAGACGG	scaffold0294	1759	+	4	1
DNA	GCAATAGTATGAACAACAA-ANGG	tCAATAGTATGAAggACcATATGG	6	6056636	-	4	1
DNA	GCAATAGTATGAACAACAA-ANGG	GtAtTAGTATGAACAACAgTgAGG	6	15177555	-	4	1
DNA	GCAATAGTATGAACAACAA-ANGG	GggATAGTATGAACAAtcAAAGGG	6	16446052	+	4	1
DNA	GCAATAGTATGAACAACAA-ANGG	GaAATtGTggGAACAACAAAAGGG	6	30811993	-	4	1
DNA	GCAATAGTATGAACAACAA-ANGG	GCAATAaaAaGAACAAaAAGAAGG	5	1094043	+	4	1
DNA	GCAATAGTATGAACAACAA-ANGG	GCAATAaTgTcAACAAaAAAATGG	5	39256729	+	4	1
DNA	GCAATAGTATGAACAACAA-ANGG	tCAATAGaATGAAaAACgATACGG	8	10148449	+	4	1
DNA	GCAATAGTATGAACAACAA-ANGG	cCAATAtTtTcAACAACAAAAAGG	2	3200335	+	4	1
DNA	GCAATAGTATGAACAACAA-ANGG	tCAATAcTATGAACAAatAAAGGG	2	4002512	+	4	1
DNA	GCAATAGTATGAACAACAA-ANGG	GCAccAGaATGgACAACAATATGG	2	28630108	+	4	1
DNA	GCAATAGTATGAACAACAA-ANGG	GCAATAGTAgGAAagACAcAAAGG	2	31696043	+	4	1
DNA	GCAATAGTATGAACAACAA-ANGG	GaAATAcTtTGAAaAACAATAAGG	2	37529610	-	4	1
DNA	GCAATAGTATGAACAACAA-ANGG	GtAATAGTATGAACttCtAGAAGG	2	45427942	-	4	1
DNA	GCAATAGTATGAACAACAA-ANGG	tCAATAaTgTGAACAAtAAGAAGG	7	22381451	-	4	1
DNA	GCAATAGTATGAACAACAA-ANGG	GCAATAGTAacAAaAAtAAAAAGG	7	31040527	-	4	1
DNA	GCAATAGTATGAACAACAA-ANGG	aCAATAtTATGgACAAaAAGAAGG	7	38574087	-	4	1
DNA	GCAATAGTATGAACAACAA-ANGG	GCcATtGTcTGAACAAtAAAATGG	1	11942988	+	4	1
DNA	GCAATAGTATGAACAACAA-ANGG	GgAATAGgATGAAtAACcAAAAGG	1	13841766	+	4	1
DNA	GCAATAGTATGAACAACAA-ANGG	GCAATAaaATGAAgAAaAAGAAGG	1	48453015	+	4	1
DNA	GCAATAGTATGAACAACAA-ANGG	GaAATAGgAacAACAACAACAAGG	3	2288122	+	4	1
DNA	GCAATAGTATGAACAACAA-ANGG	GaAATAGTATcAgaAACAAAAAGG	3	6559119	-	4	1
DNA	GCAATAGTATGAACAACAA-ANGG	taAATAcTATGAACAAgAAGAAGG	3	22920708	+	4	1
DNA	GCAATAGTATGAACAACAA-ANGG	GCAAaAcTATGtACAAgAAAACGG	3	41232621	+	4	1
DNA	GCAATAGTATGAACAACAA-ANGG	GtAATAGTATtAAaAAaAAAAAGG	4	564079	+	4	1
DNA	GCAATAGTATGAACAACAA-ANGG	GCAATAccATtAACAACAAAtTGG	4	17933767	+	4	1
DNA	GCAATAGTATGAACAACAA-ANGG	GCAAaAtTtTcAACAACAATAAGG	4	38551706	-	4	1
DNA	GCAATAGTATGAACAACAA-ANGG	aCAATtaTATcAACAACAAAAAGG	4	41463029	+	4	1
DNA	GCAATAGTATGAACAACAA-ANGG	GCAATgGgATtAAaAACAATATGG	4	41826096	+	4	1
DNA	GCAATAGTATGAACAACAA-ANGG	cCAAgAGTATGtACAAgAACAAGG	4	46219454	-	4	1
DNA	GCAATAGTATGAACAACA-AANGG	GtAtTAGTATGAACAACAGtgAGG	6	15177555	-	4	1
DNA	GCAATAGTATGAACAACA-AANGG	GggATAGTATGAACAAtcAAAGGG	6	16446052	+	4	1
DNA	GCAATAGTATGAACAACA-AANGG	cCAATgGTgTGAACAACAAcAAGG	6	20116556	+	4	1
DNA	GCAATAGTATGAACAACA-AANGG	GCAATAcTAaaAAaAACATAAGGG	6	20489454	+	4	1
DNA	GCAATAGTATGAACAACA-AANGG	GaAATtGTggGAACAACAAAAGGG	6	30811993	-	4	1
DNA	GCAATAGTATGAACAACA-AANGG	GCAtTAGTATtAAaAAaACAAAGG	5	25880724	-	4	1
DNA	GCAATAGTATGAACAACA-AANGG	tCAAaAGTATaAcCAACATAAAGG	5	28474172	-	4	1
DNA	GCAATAGTATGAACAACA-AANGG	cCAATcGaAaGAACAACAGAAAGG	5	36904312	-	4	1
DNA	GCAATAGTATGAACAACA-AANGG	GCAATAaTgTcAACAAaAAAATGG	5	39256729	+	4	1
DNA	GCAATAGTATGAACAACA-AANGG	cCAATAtTtTcAACAACAAAAAGG	2	3200335	+	4	1
DNA	GCAATAGTATGAACAACA-AANGG	tCAATAcTATGAACAAatAAAGGG	2	4002512	+	4	1
DNA	GCAATAGTATGAACAACA-AANGG	GaAAgAGgATGAACAAgATAAGGG	7	1825966	+	4	1
DNA	GCAATAGTATGAACAACA-AANGG	GCAAaAGTAaGAAaAAaACAAAGG	7	15465531	+	4	1
DNA	GCAATAGTATGAACAACA-AANGG	GCAATAGTAacAAaAAtAAAAAGG	7	31040527	-	4	1
DNA	GCAATAGTATGAACAACA-AANGG	GCcATtGTcTGAACAAtAAAATGG	1	11942988	+	4	1
DNA	GCAATAGTATGAACAACA-AANGG	GgAATAGgATGAAtAACcAAAAGG	1	13841766	+	4	1
DNA	GCAATAGTATGAACAACA-AANGG	GgAAgAtTgTGAACAACAGAAAGG	1	45325979	-	4	1
DNA	GCAATAGTATGAACAACA-AANGG	GaAATAGTATcAgaAACAAAAAGG	3	6559119	-	4	1
DNA	GCAATAGTATGAACAACA-AANGG	GaAATAaTATGAACAcaATAATGG	3	11098539	+	4	1
DNA	GCAATAGTATGAACAACA-AANGG	GCAAgAGaATGAAtAgCACAAGGG	3	26484842	+	4	1
DNA	GCAATAGTATGAACAACA-AANGG	GCAgTgGaATaAACAACAGAAGGG	3	29202942	+	4	1
DNA	GCAATAGTATGAACAACA-AANGG	GCAATAaaAaGAACAACAAgACGG	3	33091652	+	4	1
DNA	GCAATAGTATGAACAACA-AANGG	GCAATAGTATatAaAAaATAAAGG	3	36676704	+	4	1
DNA	GCAATAGTATGAACAACA-AANGG	GgAAcAGTgTGAACAAaACAAAGG	3	36322423	-	4	1
DNA	GCAATAGTATGAACAACA-AANGG	GCAATAGTATatAaAAaATAAAGG	3	36686786	+	4	1
DNA	GCAATAGTATGAACAACA-AANGG	GCAAaAcTATGtACAAgAAAACGG	3	41232621	+	4	1
DNA	GCAATAGTATGAACAACA-AANGG	tCAATAGcATcAACAAaAGAAGGG	3	50275564	-	4	1
DNA	GCAATAGTATGAACAACA-AANGG	GtAATAGTATtAAaAAaAAAAAGG	4	564079	+	4	1
DNA	GCAATAGTATGAACAACA-AANGG	GCAATAccATtAACAACAAAtTGG	4	17933767	+	4	1
DNA	GCAATAGTATGAACAACA-AANGG	GCAATcccATGAACAACATAcGGG	4	20982242	-	4	1
DNA	GCAATAGTATGAACAACA-AANGG	aCAATtaTATcAACAACAAAAAGG	4	41463029	+	4	1
DNA	GCAATAGTATGAACAACA-AANGG	GCAAcAGTAaGcAaAACACAAAGG	4	44868867	-	4	1
DNA	GCAATAGTATGAACAACA-AANGG	GCAATgaaATaAACAACAGAAGGG	4	50502435	-	4	1
DNA	GCAATAGTATGAACAAC-AAANGG	GCcATAcTATGcACAAgCAAATGG	scaffold0108	36217	+	4	1
DNA	GCAATAGTATGAACAAC-AAANGG	GCcATAcTATGcACAAgCAAATGG	scaffold0064	33813	-	4	1
DNA	GCAATAGTATGAACAAC-AAANGG	GCcATAtTATGcACAAgCAAATGG	scaffold0051	73437	+	4	1
DNA	GCAATAGTATGAACAAC-AAANGG	GCcATAtTATGcACAAgCAAATGG	scaffold0040	34977	+	4	1
DNA	GCAATAGTATGAACAAC-AAANGG	tCAATAGTATGAAggACCAtATGG	6	6056636	-	4	1
DNA	GCAATAGTATGAACAAC-AAANGG	cCAATAaaATGAACAAaGAAAAGG	6	10101716	-	4	1
DNA	GCAATAGTATGAACAAC-AAANGG	GCAATtGTATGAAgAttGAAAAGG	6	10500764	-	4	1
DNA	GCAATAGTATGAACAAC-AAANGG	cCAATgGTgTGAACAACAAcAAGG	6	20116556	+	4	1
DNA	GCAATAGTATGAACAAC-AAANGG	GaAATtGTggGAACAACAAAAGGG	6	30811993	-	4	1
DNA	GCAATAGTATGAACAAC-AAANGG	agAATAGTATaAACAACGAAgAGG	6	31697890	+	4	1
DNA	GCAATAGTATGAACAAC-AAANGG	GCAATAaTgTcAACAAaAAAATGG	5	39256729	+	4	1
DNA	GCAATAGTATGAACAAC-AAANGG	tCAATAaTATcAAaAACGAAAAGG	5	42195040	-	4	1
DNA	GCAATAGTATGAACAAC-AAANGG	tCAATAGaATGAAaAACGAtACGG	8	10148449	+	4	1
DNA	GCAATAGTATGAACAAC-AAANGG	atAATAGTATtAAtAACCAAATGG	8	41630782	+	4	1
DNA	GCAATAGTATGAACAAC-AAANGG	cCAATAtTtTcAACAACAAAAAGG	2	3200335	+	4	1
DNA	GCAATAGTATGAACAAC-AAANGG	GCAATAGTAgGAAagACAcAAAGG	2	31696043	+	4	1
DNA	GCAATAGTATGAACAAC-AAANGG	GCAATAtTATcAACAAaCAAtAGG	2	42362818	+	4	1
DNA	GCAATAGTATGAACAAC-AAANGG	GtAATAGTATGAACttCTAgAAGG	2	45427942	-	4	1
DNA	GCAATAGTATGAACAAC-AAANGG	GCAAaAagATcAACAACCAAAAGG	7	1414157	-	4	1
DNA	GCAATAGTATGAACAAC-AAANGG	GCAATAGTAacAAaAAtAAAAAGG	7	31040527	-	4	1
DNA	GCAATAGTATGAACAAC-AAANGG	aCAATAGTATtAtCAAaTAAAGGG	7	32280549	+	4	1
DNA	GCAATAGTATGAACAAC-AAANGG	GCcATtGTcTGAACAAtAAAATGG	1	11942988	+	4	1
DNA	GCAATAGTATGAACAAC-AAANGG	GCAATAGTATcAACAAtAtgAGGG	1	17223868	+	4	1
DNA	GCAATAGTATGAACAAC-AAANGG	GaAATAGTATcAgaAACAAAAAGG	3	6559119	-	4	1
DNA	GCAATAGTATGAACAAC-AAANGG	GCcATAaTtgGAACAACCAAATGG	3	12023214	-	4	1
DNA	GCAATAGTATGAACAAC-AAANGG	GCcATAaTtgGAACAACCAAATGG	3	13049148	+	4	1
DNA	GCAATAGTATGAACAAC-AAANGG	GCcATAaTtgGAACAACCAAATGG	3	13041071	+	4	1
DNA	GCAATAGTATGAACAAC-AAANGG	GCAATAaaAaGAACAACAAgACGG	3	33091652	+	4	1
DNA	GCAATAGTATGAACAAC-AAANGG	GCAAaAcTATGtACAAgAAAACGG	3	41232621	+	4	1
DNA	GCAATAGTATGAACAAC-AAANGG	GtAATAGTATtAAaAAaAAAAAGG	4	564079	+	4	1
DNA	GCAATAGTATGAACAAC-AAANGG	GCAATAccATtAACAACAAAtTGG	4	17933767	+	4	1
DNA	GCAATAGTATGAACAAC-AAANGG	cCAtTAGTATcAACAAtTAAAAGG	4	31374234	+	4	1
DNA	GCAATAGTATGAACAAC-AAANGG	aCAATtaTATcAACAACAAAAAGG	4	41463029	+	4	1
DNA	GCAATAGTATGAACAA-CAAANGG	aCAATAtTATGcACAAGCgAACGG	scaffold1900	577	-	4	1
DNA	GCAATAGTATGAACAA-CAAANGG	tCcATAcTATGcACAAGCAAATGG	scaffold0304	19193	-	4	1
DNA	GCAATAGTATGAACAA-CAAANGG	aCcATAtTATGcACAAGCAAATGG	scaffold0241	18713	+	4	1
DNA	GCAATAGTATGAACAA-CAAANGG	GCAATAGaAaGAACtgACAAACGG	scaffold0069	50904	+	4	1
DNA	GCAATAGTATGAACAA-CAAANGG	aCcATAtTATGcACAAGCAAATGG	scaffold0023	68145	+	4	1
DNA	GCAATAGTATGAACAA-CAAANGG	aCcATAcTATGcACAAGCAAACGG	scaffold0023	7498	+	4	1
DNA	GCAATAGTATGAACAA-CAAANGG	aCcATAtTATGcACAAGCAAATGG	scaffold0023	77323	+	4	1
DNA	GCAATAGTATGAACAA-CAAANGG	GgcATgGTATaAACAAACAAATGG	scaffold0019	5579	+	4	1
DNA	GCAATAGTATGAACAA-CAAANGG	GCcATAaTATGccCAAGCAAATGG	scaffold0013	113466	+	4	1
DNA	GCAATAGTATGAACAA-CAAANGG	GCAATAGaAaGAACtgACAAACGG	scaffold0012	118728	+	4	1
DNA	GCAATAGTATGAACAA-CAAANGG	GCAATAGaAaGAACtgACAAACGG	scaffold0006	208851	+	4	1
DNA	GCAATAGTATGAACAA-CAAANGG	aCcATAtTATGcACAAGCAAATGG	scaffold0001	122942	-	4	1
DNA	GCAATAGTATGAACAA-CAAANGG	tCAATAGTATGAAggACCAtATGG	6	6056636	-	4	1
DNA	GCAATAGTATGAACAA-CAAANGG	GCAAcAGgAaGtACAAACAAAAGG	6	6946850	+	4	1
DNA	GCAATAGTATGAACAA-CAAANGG	cCAATAaaATGAACAAAgAAAAGG	6	10101716	-	4	1
DNA	GCAATAGTATGAACAA-CAAANGG	GCAATtGTATGAAgAtTgAAAAGG	6	10500764	-	4	1
DNA	GCAATAGTATGAACAA-CAAANGG	GgAcTAGTATGtACAAACAAtTGG	6	32527366	-	4	1
DNA	GCAATAGTATGAACAA-CAAANGG	GCAAgAGgAaGAACAgACAAAGGG	5	5258180	+	4	1
DNA	GCAATAGTATGAACAA-CAAANGG	GCAATAtTtTaAACAtGCAAAAGG	5	6037320	-	4	1
DNA	GCAATAGTATGAACAA-CAAANGG	GCAATAGcAatgACAATCAAATGG	5	33009261	+	4	1
DNA	GCAATAGTATGAACAA-CAAANGG	GCAATAaTgTcAACAAAaAAATGG	5	39256729	+	4	1
DNA	GCAATAGTATGAACAA-CAAANGG	GCAtTAGTtTtAACtAGCAAATGG	5	40921672	+	4	1
DNA	GCAATAGTATGAACAA-CAAANGG	GCcATtGaATaAACAAACAAAAGG	8	5572260	+	4	1
DNA	GCAATAGTATGAACAA-CAAANGG	GggATAGTATGAAtgATCAAAGGG	8	7901015	-	4	1
DNA	GCAATAGTATGAACAA-CAAANGG	GCAgTAGTAaGAgCAgACAAACGG	8	29634740	+	4	1
DNA	GCAATAGTATGAACAA-CAAANGG	atAATAGTATtAAtAACCAAATGG	8	41630782	+	4	1
DNA	GCAATAGTATGAACAA-CAAANGG	cCAtTtGTATGAAtAATCAAAAGG	2	1865033	-	4	1
DNA	GCAATAGTATGAACAA-CAAANGG	atAATAaTATGAACAtACAAAGGG	2	4300552	+	4	1
DNA	GCAATAGTATGAACAA-CAAANGG	GggATtGTATGAACAATCAAtGGG	2	18965481	+	4	1
DNA	GCAATAGTATGAACAA-CAAANGG	GCAAaAagATcAACAACCAAAAGG	7	1414157	-	4	1
DNA	GCAATAGTATGAACAA-CAAANGG	aCcATAcTATGcACAAGCAAATGG	7	14338814	-	4	1
DNA	GCAATAGTATGAACAA-CAAANGG	GCAATAGTAacAAaAATaAAAAGG	7	31040527	-	4	1
DNA	GCAATAGTATGAACAA-CAAANGG	aCAATAGTATtAtCAAAtAAAGGG	7	32280549	+	4	1
DNA	GCAATAGTATGAACAA-CAAANGG	GCgcTtGTtTGAACAAGCAAACGG	7	32534884	-	4	1
DNA	GCAATAGTATGAACAA-CAAANGG	GCAtTgGTcTGAACAAGCcAAGGG	7	38643727	-	4	1
DNA	GCAATAGTATGAACAA-CAAANGG	GCcATtGTcTGAACAATaAAATGG	1	11942988	+	4	1
DNA	GCAATAGTATGAACAA-CAAANGG	GCAATAGTAgtAAaAAACcAAGGG	1	11838636	-	4	1
DNA	GCAATAGTATGAACAA-CAAANGG	GCAATAGaAaGAACtgACAAACGG	1	13590016	+	4	1
DNA	GCAATAGTATGAACAA-CAAANGG	GCAATAGTATcAACAATatgAGGG	1	17223868	+	4	1
DNA	GCAATAGTATGAACAA-CAAANGG	GCAATAGaAaGAACtgACAAACGG	1	20371750	+	4	1
DNA	GCAATAGTATGAACAA-CAAANGG	GCAATAGaAaGAACtgACAAACGG	1	20481008	+	4	1
DNA	GCAATAGTATGAACAA-CAAANGG	aCcATAcTATGcACAAGCAAATGG	1	22690392	-	4	1
DNA	GCAATAGTATGAACAA-CAAANGG	cCAtTtGTATtAACAAACAAAAGG	1	28296203	-	4	1
DNA	GCAATAGTATGAACAA-CAAANGG	GCcATAaTtgGAACAACCAAATGG	3	12023214	-	4	1
DNA	GCAATAGTATGAACAA-CAAANGG	GCAATAGaAatgACAATCAAATGG	3	12742562	+	4	1
DNA	GCAATAGTATGAACAA-CAAANGG	GCcATAaTtgGAACAACCAAATGG	3	13041071	+	4	1
DNA	GCAATAGTATGAACAA-CAAANGG	GCcATAaTtgGAACAACCAAATGG	3	13049148	+	4	1
DNA	GCAATAGTATGAACAA-CAAANGG	GCAAgtGcATaAACAATCAAAGGG	3	40164592	-	4	1
DNA	GCAATAGTATGAACAA-CAAANGG	GCAAaAcTATGtACAAGaAAACGG	3	41232621	+	4	1
DNA	GCAATAGTATGAACAA-CAAANGG	GggATAGTgTtAACAATCAAATGG	3	47492333	+	4	1
DNA	GCAATAGTATGAACAA-CAAANGG	aCAATtGTATGcAtAAACAAATGG	3	53288482	+	4	1
DNA	GCAATAGTATGAACAA-CAAANGG	aCAATtGTATGcAtAAACAAATGG	3	55288186	-	4	1
DNA	GCAATAGTATGAACAA-CAAANGG	GtAATAGTATtAAaAAAaAAAAGG	4	564079	+	4	1
DNA	GCAATAGTATGAACAA-CAAANGG	GgAATAaTATGtACAAGCAtAAGG	4	10594023	-	4	1
DNA	GCAATAGTATGAACAA-CAAANGG	aCcATAcTATGcACAAGCAAATGG	4	14563399	-	4	1
DNA	GCAATAGTATGAACAA-CAAANGG	cCAtTAGTATcAACAATtAAAAGG	4	31374234	+	4	1
DNA	GCAATAGTATGAACAA-CAAANGG	GCcAaAtTATGAAtAATCAAATGG	4	40278070	+	4	1
DNA	GCAATAGTATGAACAA-CAAANGG	GCAAataTATtAACAAACAAAAGG	4	42630128	+	4	1
DNA	GCAATAGTATGAACAA-CAAANGG	GaAAaAGTATGtAaAAGCAAAAGG	4	51526791	+	4	1
DNA	GCAATAGTATGAACAA-CAAANGG	GtAATtaTATGAtCAAACAAAAGG	4	55048275	+	4	1
DNA	GCAATAGTATGAACA-ACAAANGG	GCcATAcTATGcACAAgCAAATGG	scaffold0108	36217	+	4	1
DNA	GCAATAGTATGAACA-ACAAANGG	GCcATAcTATGcACAAgCAAATGG	scaffold0064	33813	-	4	1
DNA	GCAATAGTATGAACA-ACAAANGG	GCcATAtTATGcACAAgCAAATGG	scaffold0051	73437	+	4	1
DNA	GCAATAGTATGAACA-ACAAANGG	GCcATAtTATGcACAAgCAAATGG	scaffold0040	34977	+	4	1
DNA	GCAATAGTATGAACA-ACAAANGG	GgcATgGTATaAACAAACAAATGG	scaffold0019	5579	+	4	1
DNA	GCAATAGTATGAACA-ACAAANGG	GCAATAGaAaGAACtGAtAAACGG	scaffold0006	171069	+	4	1
DNA	GCAATAGTATGAACA-ACAAANGG	GCAAcAGgAaGtACAAACAAAAGG	6	6946850	+	4	1
DNA	GCAATAGTATGAACA-ACAAANGG	tCAgTAGgATGAACATAgAAAGGG	6	8984911	-	4	1
DNA	GCAATAGTATGAACA-ACAAANGG	GgAATcaaATGAACATACAAAAGG	6	9883163	-	4	1
DNA	GCAATAGTATGAACA-ACAAANGG	cCAATAaaATGAACAAAgAAAAGG	6	10101716	-	4	1
DNA	GCAATAGTATGAACA-ACAAANGG	GCAATtGTATGAAgATtgAAAAGG	6	10500764	-	4	1
DNA	GCAATAGTATGAACA-ACAAANGG	tCAgTAGgATGAACATAgAAAGGG	6	14716189	-	4	1
DNA	GCAATAGTATGAACA-ACAAANGG	GgAcTAGTATGtACAAACAAtTGG	6	32527366	-	4	1
DNA	GCAATAGTATGAACA-ACAAANGG	GCAATAtTtTaAACATgCAAAAGG	5	6037320	-	4	1
DNA	GCAATAGTATGAACA-ACAAANGG	GCAAaAGTATGAAaATAgAgAAGG	5	7140317	-	4	1
DNA	GCAATAGTATGAACA-ACAAANGG	GCtAaAGcATGAgCACACAAATGG	5	10658933	-	4	1
DNA	GCAATAGTATGAACA-ACAAANGG	caAATAGaAgGAACACACAAATGG	5	15707347	-	4	1
DNA	GCAATAGTATGAACA-ACAAANGG	GCAATAaTgTcAACAAAaAAATGG	5	39256729	+	4	1
DNA	GCAATAGTATGAACA-ACAAANGG	GCAAgAGTATGAAacTAaAAAGGG	5	39833611	-	4	1
DNA	GCAATAGTATGAACA-ACAAANGG	GCcATtGaATaAACAAACAAAAGG	8	5572260	+	4	1
DNA	GCAATAGTATGAACA-ACAAANGG	caAATAaTcTGAACACACAAAAGG	8	11493271	+	4	1
DNA	GCAATAGTATGAACA-ACAAANGG	GCAATAGaAaGAgCgGACAAACGG	8	43974818	+	4	1
DNA	GCAATAGTATGAACA-ACAAANGG	GaAATAGaATGtACACAaAAATGG	2	416757	+	4	1
DNA	GCAATAGTATGAACA-ACAAANGG	aCAATAGTATtAtCAAAtAAAGGG	7	32280549	+	4	1
DNA	GCAATAGTATGAACA-ACAAANGG	aaAATAGaATGAcCATACAAATGG	1	1006635	+	4	1
DNA	GCAATAGTATGAACA-ACAAANGG	GCAATAGTAgtAAaAAACcAAGGG	1	11838636	-	4	1
DNA	GCAATAGTATGAACA-ACAAANGG	GCAATAGaAaGAACtGAtAAACGG	1	13673455	+	4	1
DNA	GCAATAGTATGAACA-ACAAANGG	GgAATAGgATGAAtAAcCAAAAGG	1	13841766	+	4	1
DNA	GCAATAGTATGAACA-ACAAANGG	cCAtTtGTATtAACAAACAAAAGG	1	28296203	-	4	1
DNA	GCAATAGTATGAACA-ACAAANGG	GCAtTAaTcTGAACATAaAAATGG	1	29746817	+	4	1
DNA	GCAATAGTATGAACA-ACAAANGG	GCAgTAGaAaGAACgGACAAACGG	1	44507185	+	4	1
DNA	GCAATAGTATGAACA-ACAAANGG	GCAgTAGaAaGAgCAGACAAACGG	1	45652541	+	4	1
DNA	GCAATAGTATGAACA-ACAAANGG	GaAATAaTATGAACACAatAATGG	3	11098539	+	4	1
DNA	GCAATAGTATGAACA-ACAAANGG	aCcAgAGTAaGAACATACAAAAGG	3	41244001	+	4	1
DNA	GCAATAGTATGAACA-ACAAANGG	caAATAcTATGAACATAtAAAAGG	3	44465912	+	4	1
DNA	GCAATAGTATGAACA-ACAAANGG	aCAATtGTATGcAtAAACAAATGG	3	53288482	+	4	1
DNA	GCAATAGTATGAACA-ACAAANGG	aCAATtGTATGcAtAAACAAATGG	3	55288186	-	4	1
DNA	GCAATAGTATGAACA-ACAAANGG	GtAATAGTATtAAaAAAaAAAAGG	4	564079	+	4	1
DNA	GCAATAGTATGAACA-ACAAANGG	GCAATtGTATGAAaACACtAgAGG	4	8126702	+	4	1
DNA	GCAATAGTATGAACA-ACAAANGG	GCAATAGaAaGAgCgGACAAACGG	4	33731849	+	4	1
[truncated: 3,093 more rows]

## Sheet: CYP72A61 gRNA2
#Bulge type	crRNA	DNA	Chromosome	Position	Direction	Mismatches	Bulge Size
[truncated: 3,721 more rows]
